# Supplementary material for: miR-344d-3p regulates osteogenic and adipogenic differentiation of mouse mandibular bone marrow mesenchymal stem cells
Source: PeerJ journal article supplement (doi:10.7717/peerj.14838), 2023-02-14

>mmu-miR-344d-3p MIMAT0014808

GAUAUAACCACUGCCAGACUGA

GTTATAT

GTTATA

TTATAT

Two 6-binding sites were manually predicted (green)

3‘ UTR of Dnmt3a

Mus musculus DNA methyltransferase 3A (Dnmt3a), transcript variant 1, mRNA

NCBI Reference Sequence: NM_007872.4

gggacatgggggcaaactgaagtagtgatgataaaaaagttaaacaaacaaacaaacaaaaaacaaaacaaaacaataaaacaccaagaacgagaggacggagaaaagttcagcacccagaagagaaaaaggaatttaaagcaaaccacagaggaggaaaacgccggagggcttggccttgcaaaagggttggacatcatctcctgagttttcaatgttaaccttcagtcctatctaaaaagcaaaataggcccctccccttcttcccctccggtcctaggaggcgaactttttgttttctactctttttcagaggggttttctgtttgtttgggtttttgtttcttgctgtgactgaaacaagagagttattgcagcaaaatcagtaacaacaaaaagtagaaatgccttggagaggaaagggagagagggaaaattctataaaaacttaaaatattggtttttttttttttccttttctatatatctctttggttgtctctagcctgatcagataggagcacaaacaggaagagaatagagaccctcggaggcagagtctcctctcccaccccccgagcagtctcaacagcaccattcctggtcatgcaaaacagaacccaactagcagcagggcgctgagagaacaccacaccagacacttttctacagtatttcaggtgcctaccacacaggaaaccttgaagaaaaccagtttctagaagccgctgttacctcttgtttacagtttatatatatatgatagatatgagatatatatatataaaaggtactgttaactactgtacatcccgacttcataatggtgctttcaaaacagcgagatgagcaaagacatcagcttccgcctggccctctgtgcaaagggtttcagcccaggatggggagaggggagcagctggagggggttttaacaaactgaaggatgacccatatcaccccccacccctgccccatgcctagcttcacctgccaaaaaggggctcagctgaggtggtcggaccctggggaagctgagtgtggaatttatccagactcgcgtgcaataaccttagaatatgaatctaaaatgactgcctcagaaaaatggcttgagaaaacattgtccctgattttgaattcgtcagccacgttgaaggccccttgtgggatcagaaatattccagagtgagggaaagtgacccgccattaaccccacctggagcaaataaaaaaacatacaaaatgtactggtgctttctgtctaagttgccttttgtgtgttcttttataaggccccaccatcccctctgcacatggcagctccggtcctggaatgtgatgtttttggtcatctctaaagactgcagtttcatacttgggaggctgatgacacctttattataattattcttatggttctggctataattgttttaagattttctttcagaaaacaaaaacccaacacccttccctttaggtttcaaaccaaggtgcgggggggtggcaggtgcttttttaaggaccagtggctctggtgccctggctcccacccctcaggccaggtgagccactgggcaacaagctaggcagccagggagtttgaggcccaccctccgggccagtcactcttctcttcttcttcccttcctcgtgagtccggtgtgtcagggctggagggaggccggggcagcctccctccttgtgtgtgtggttggagtggcgtgtgtttcttttctagtgtttgctctgatggctgtgctctcacttgagtcagcttcacctgggccatgtgctcgcactttgttccgctccccagccagggcaggcagcctggcattggcagcgggaagggaaggtgtgcttggccccagggtgagggcttgcctggatggatggagtgtagatatgtggcatatagagatatatattttataatgggaggggggacggcacctcctgggaccagcagagactgggaggtgtgctgtcaagcacatggtcccaagaccgcatccctagaaagatggggcctatgataggccctatataaatacatagatagggtcatgtataagaaatatacacagagggggttggagggagtgggctctgtgttgagcctgggtccttcccgcagacagccccacaaacagtatatcagtctaacacatgcacaggaatctatttctgtctggatgcacaccagggagcccccagcacacttctctgcaggatcaggacgatggagtcggctacacagctctctctcgtacatctgttgccctgatgacaggtagactcgatcccagaagttgctaggtgctgaagtcaggaaaaggaggaggtttgatccaagcaggtgcttcctctagcaggtctgtgttgtattccctttgcctctggtgatgtcagcttctgttagcagcctgtggttactgacctgcaactctcggcaccagtcaagtcagccctcagcccctacctattctccccaaccaaagtcgaactgaaatctctcttggccatggggcttccattgggaaaataaaatgttaaaaaaaaaattaaaatgggacagtgaacctcacttttggagtaaagcaaatcagtaattagtgctaaaactagtcagaggctttggccccttgctcactgctcgggactaagcttggctggtggcttggtacactgcttgggctgtgtagtcctgcccacctctgctcattttctctggatagagttttaagatcgcagctagtttcccctgccatggcaggtatgactatggggctggagcatccaggagagggggatgcttgccctcttggagtccctgtactaaatgtaacgtcctcccttgctccagcagggctccattctgacctggagtccaccagcaccatgcaggaggactggaggggaggaaggctgctttaggcagtccaaggtgctccctccccctctagcaatggcaaggtcttcccagctcctgtcaggactgtcttcaaaggccatctctgcccaccgcatatgtgacgaagctagcctttcccaggagcctagtgccgcctcagctgggcctggtgctcccgtgcctggggttagtgtgagggctcaggaggaggagttcccaagggactgagtagaggcttccaggtggctgaccagtactgacctgacacggtccctgatggactcctcatggggcgggcatcgggtggccttctctagctttccttccagccccatctgtaggcttagtcttaccatagtgtgagggcaccaggcgagttagcccccaatatcttttggggaggggtgtctttgggactgtgccaatctggctattcatccgtctctaccccaagtgcggcttctagggtcacctctgaggagagctgctgggatgctggggtagctgaggggaggttgtggggagtttgcagtgcatctaggaactagctcactgcaggtggggctgaagctggattcagtcatgggaggttccctgtgggctttcctttccaaagactaggcttgttttccctagaaactaaggtgctggggactgggtgacagccacctctcagcaggtgccgtgtaagtgtgaagatttgtgaagatctgtggcccttgcccaggggaggtagctggtgctagcaccagggtcacagaactaaggcctcctgaggaggcacacataccagcggggtcccaagctggtgctaattcctctcataggacccagtaagcccgggagcctgcagtcggctgtttctctgctgtggaataccctgttagaaagctgaggtcccctaaagagcctcctggaccgagtcacttttgtggccgggctgagtatggcagcaggtagaaagatccgcaggcataaagatccctgtggcttttggcaaatgactgaagtgtggatgcaggagcaatgagtggaggccaacatcaacagcatctaccctccccaatagtgtctctgttctgggggtgctgtggtcctcacttgctggcttaggattggagttaggctgagccactttgaaggagtgtgtttacaggaagatacaaattgttggtttctctattctttactgtacagtgtgtccagagagtagaagaaaattcctgggcctgtctggttggtgcagagcttttatggcactacaaggtcttcaggaactgtcactgtaagagccctggctgtgagctggggctacgtgaccactgcagctgagtttccaagcaggcctgtgtttggatctgagtttgacgcttggcggctcccagggcttgggatgagtggcagtgctgacttgttcacttggcagagccaccctgtgaggaggtggacttagtggccctttccaattgatcctgtcccatccaggcagtatcagcactaggagcagtgctgggtcagaagtccgaaggaaaggactcggttgatcggggtcattgtgagcttgtgtatgtttgtgtagagaaagctgaactttgggaggaaaggccttgtccttgcaggcttccaagacaccgctaaggttagcctttggttggagacaagtctctagcccagacactggagtaggcgctgagaccaagaggcaggccaagatggagatctatggaaggccctttgctggtagggattcaaagcttctccaggggaccccagaactctattaactggctcccctaccgggacaagcttcgtttgtgggctcatagagtggccatagagtgggtttaacccagcaccaagcctgagggcatgagcagtggtctaaagtctcacatagtcccattttacagactaatttgattgcccggccgtagaattctacagaaacaacaatcactgaaattccttagaatacgcagagggaggaggtgactcaacacggtgctaaacacattttattaaaaatatatattgttaaattaagtctgctgtctggacaatgatgttctgttttgttttcttgtagtggagtttaaaagagactattattttactctgatatattattattaaaaaggcattttaactttgtacttgaaaactaagtgagcgatttcacgtgttttagctgagacatcgaagtagcgggtgcttacttgtgggaaatcatgtattcatactacaacataaactccgtagctgatttggtaataacttttactgttacagacgaattcgctttgaccccggtggcagagcgctttgactccacattccacgcagctaagtgcaggaccttccagaaccttccccggtcccccctggtcctctttcggttcctcttcctagctctctcttttcctaattcttttttttaagaattgtcgtttgtttttcctggtcccggcttccttctaccactgtattttttgttagggttgcttctctatttattgacagtaataatgtacatttcacagtctggttctgggacagccaggaggggtgtggggggctgcatacagcttgctgcactctccggtgtcctgttgtatctctgtgtacgtgatgcttgtgacatagctgttgaagaaatattaaaaggtcaatgcgtacagcaggtgtagagagtccgtcagttccgcttcatcactttttttttttttttttgtgcccagaagaatataataaagctcctttctaatgtacttgtgctggagaacacttgaataaatggactgtttttgtgcaaaaagaaaaacggaaaaaaaaaaaaaagcaccgtcataatgtccttttgtcctgcgactcctttcccctgatgtggccactcacagtcctccagtgggctgaagtgggtgcagtttacgttgggagggtctgggaaatggatttctaaagtatctctcatatgggtgttaactaggggttgggacccaagggcagagggagtttggttcaagatcaaaaacaggttagactaaggtgaagttgtctcgtttacttcccaaaccagcagattctcgagaccagagcaggcaacagactggcatcctggttagctggcagtaggaccagcagggacttatggatgccagagtccagaaggaagaagtcagcaaaggagagaggcagctggggctgggggaatcctggaagaaccttgcgtttaaaggagatatttgcaaacacttgacaggtgacccaagggctgggatcagtggccaatagggctactgctggtctgagcataggctgcctggcagggccttgcagcctgaggagttgtccaccgtgtctctgccatacctatctagaagggccgtctgtatgcggggtctgtctgtcctgcatatctccgggagtagccagcaggcttggctggggttccactcctaaggactgtccacccgtttcttccagcaaactttctggacggttggatagggagagaccgtgtggcggtccttgagcagactgggaaagtttggctaaacaggttttctcatgggcactttttcttgctttttctttgacaaggttgtaaatgtgtatttggcttttactctactttttttcttgatgtttttcaatgttgatgtggaatcttactttcaaatggctgcatggcattttcttgttgaatgtttgtttatatatattttattttcgctataaatagagcttcaataaacatctttatgttttggcttccc

Website prediction Results：http://www.mirdb.org/cgi-bin/search.cgi


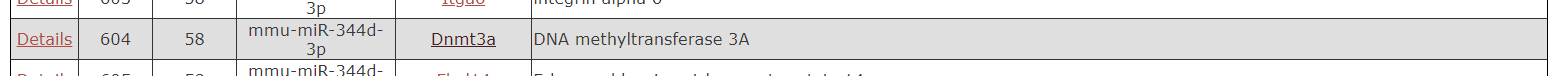


https://www.ncbi.nlm.nih.gov/gene?cmd=Retrieve&dopt=full_report&list_uids=13435


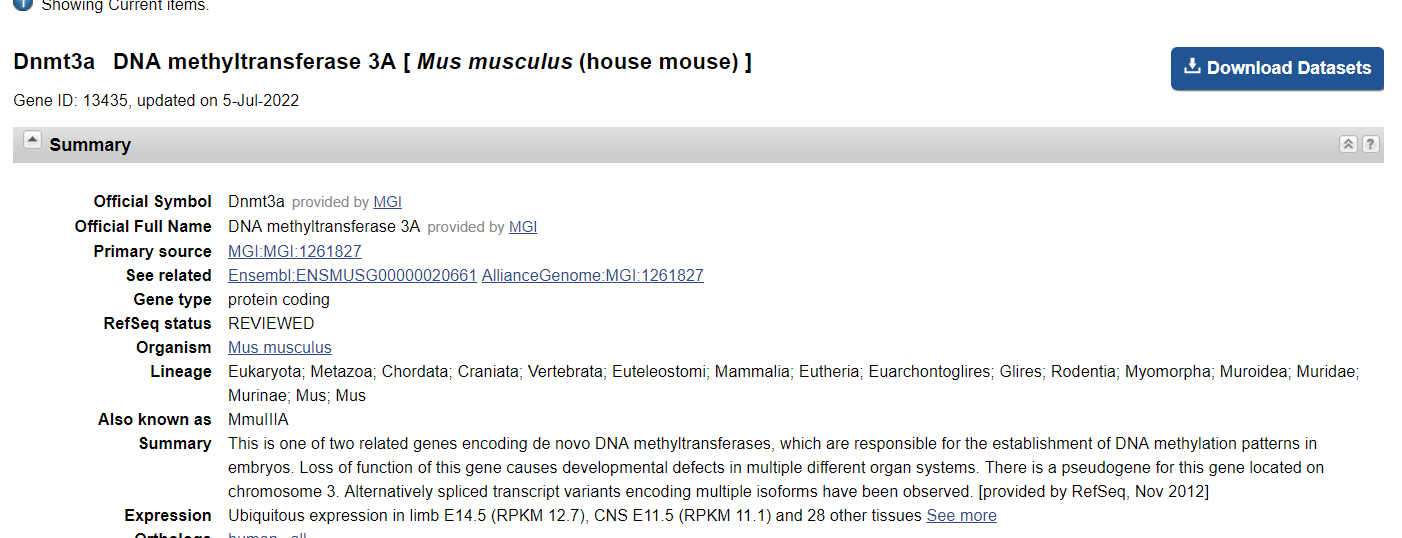

Supplement: Figure_5.zip [file Figure_5.zip]
