# Supplementary material for: miR-344d-3p regulates osteogenic and adipogenic differentiation of mouse mandibular bone marrow mesenchymal stem cells
Source: PeerJ journal article supplement (doi:10.7717/peerj.14838), 2023-02-14
Supplement: Figure_2.zip [file Figure_2.zip]

## Sheet: Sheet1
Pre-miRNA Index	miRNA_Index	miR_name	Ohe1(norm)	Ohe2(norm)	Ohe3(norm)	She1(norm)	She2(norm)	She3(norm)	COUNT(Ohe1)	COUNT(She1)	count	av	FC	absFC	FTSET	TTEST	X	Y	ABS	2	1.30103
168	290	mmu-miR-218-2-3p_R+1	0	0	0	9.97709	8.99674	7.59914	3	0	1		0		#DIV/0!	0.00601299	#NUM!	2.22091	#NUM!
317	539	mmu-miR-496a-5p	0	0	0	4.15712	4.90731	12.9185	3	0	1		0		#DIV/0!	0.120509	#NUM!	0.918979	#NUM!
345	585	mmu-miR-666-3p_R+2	0	0	0	12.4714	6.54308	12.1586	3	0	1		0		#DIV/0!	0.0326835	#NUM!	1.48567	#NUM!
421	687	mmu-miR-880-3p	23.7488	6.79897	9.81729	0	0	0	0	3	1		#DIV/0!		#DIV/0!	0.123292	#DIV/0!	0.909064	#DIV/0!
479	767	mmu-miR-3070-2-3p	0	0	0	4.15712	4.08943	6.83923	3	0	1		0		#DIV/0!	0.0309307	#NUM!	1.50961	#NUM!
481	770	mmu-miR-3074-5p	0	0	0	9.97709	4.49837	1.89979	3	0	1		0		#DIV/0!	0.148876	#NUM!	0.827175	#NUM!
481	771	mmu-miR-3074-1-3p_R+1	0	0	0	4.98855	4.08943	4.55948	3	0	1		0		#DIV/0!	0.00324646	#NUM!	2.48859	#NUM!
482	772	mmu-miR-3074-5p	0	0	0	9.97709	4.49837	1.89979	3	0	1		0		#DIV/0!	0.148876	#NUM!	0.827175	#NUM!
492	786	mmu-miR-3109-3p_R-1	0	0	0	19.9542	4.08943	5.3194	3	0	1		0		#DIV/0!	0.194723	#NUM!	0.710584	#NUM!
503	801	mmu-mir-3473h-p3	0	0	0	12.0557	2.04471	1.89979	3	0	1		0		#DIV/0!	0.253491	#NUM!	0.596037	#NUM!
524	825	mmu-mir-5123-p5	0	0	0	4.15712	5.7252	3.79957	3	0	1		0		#DIV/0!	0.0164009	#NUM!	1.78513	#NUM!
540	847	mmu-miR-6418-3p_1ss22GT	0	0	0	8.31424	13.9041	12.9185	3	0	1		0		#DIV/0!	0.0209557	#NUM!	1.6787	#NUM!
614	929	mmu-miR-7651-5p	0	0	0	4.15712	4.08943	4.55948	3	0	1		0		#DIV/0!	0.00117915	#NUM!	2.92843	#NUM!
69	67	bta-miR-342_R-1	0	0	0	4.98855	5.7252	4.55948	3	0	1		0		#DIV/0!	0.00444065	#NUM!	2.35255	#NUM!
81	64	hsa-mir-636-p3_1ss19CG	0	0	0	2.07856	2.45366	3.03966	3	0	1		0		#DIV/0!	0.0120557	#NUM!	1.91881	#NUM!
244	190	efu-mir-9298-p5_1ss16GA	504.206	190.371	17.453	0	0	0	0	3	1		#DIV/0!		#DIV/0!	0.237634	#DIV/0!	0.624091	#DIV/0!
43	44	ola-miR-192-5p_R+3	0	0	0	5.81997	23.7187	12.9185	3	0	1		0		#DIV/0!	0.112777	#NUM!	0.947778	#NUM!
30	30	PC-5p-39826_23	65.766	6.79897	8.72648	0	0	0	0	3	1		#DIV/0!		#DIV/0!	0.296241	#DIV/0!	0.528355	#DIV/0!
396	655	mmu-miR-714	158.934	20.3969	0	0	0	6.83923	1	2	0	31.0284	26.221	26.221	0.00416126	0.368531	4.71265	0.433526	4.71265
215	372	mmu-miR-344d-3p	0	0	2.54522	18.0142	23.9913	19.5045	2	0	1		0.041379	-24.1668	0.364788	0.000585669	-4.59496	3.23235	4.59496
216	373	mmu-miR-344d-3p	0	0	2.54522	18.0142	23.9913	19.5045	2	0	1		0.041379	-24.1668	0.364788	0.000585669	-4.59496	3.23235	4.59496
218	375	mmu-miR-344d-3p	0	0	2.54522	18.0142	23.9913	19.5045	2	0	1		0.041379	-24.1668	0.364788	0.000585669	-4.59496	3.23235	4.59496
147	114	hsa-miR-1469_L-2R-1_1ss10GC	53.8916	0	0	0	0	2.27974	2	2	0	9.36188	23.6393	23.6393	0.00357259	0.439314	4.56312	0.357224	4.56312
131	103	hsa-miR-1268a_R+1_1ss10TG	44.7574	0	0	0	0	1.89979	2	2	0	7.7762	23.5592	23.5592	0.00359689	0.439373	4.55822	0.357167	4.55822
132	103	hsa-miR-1268a_R+1_1ss10TG	44.7574	0	0	0	0	1.89979	2	2	0	7.7762	23.5592	23.5592	0.00359689	0.439373	4.55822	0.357167	4.55822
191	195	hsa-miR-1469_L-3_1ss10GC	421.998	42.7364	0	17.4599	0	3.79957	1	1	0	80.999	21.8601	21.8601	0.00312033	0.385252	4.45023	0.414255	4.45023
526	828	mmu-miR-5126_L+1R-5	1823.18	661.442	91.6281	42.4026	20.4471	60.0332	0	0	2		20.9651	20.9651	0.00100961	0.249649	4.38992	0.602671	4.38992
470	754	mmu-miR-2137_L-2R-1_1ss16AG	1819.53	810.048	81.8108	37.4141	53.1626	57.7535	0	0	2		18.2794	18.2794	0.000298829	0.232008	4.19215	0.634497	4.19215
3	3	hsa-miR-1248_R-4	283.159	202.998	38.1784	7.48282	13.9041	7.59914	0	0	2		18.0892	18.0892	0.0017291	0.149086	4.17706	0.826562	4.17706
210	210	PC-3p-33741_31	10.961	6.79897	40.36	0	0	3.79957	0	2	1		15.2964	15.2964	0.0283513	0.227344	3.93512	0.643317	3.93512
144	111	hsa-miR-1469_L-3R-1_1ss10GC	200.038	14.5692	0	4.98855	0	9.11897	1	1	0	38.1191	15.2123	15.2123	0.00334714	0.408323	3.92716	0.388996	3.92716
5	6	cgr-miR-2424	9.13416	5.82769	51.2681	0	0	4.55948	0	2	1		14.5257	14.5257	0.0213624	0.294574	3.86054	0.530805	3.86054
273	212	bta-miR-11987_L-1R-2_1ss8TA	215.566	92.7573	59.4492	17.4599	4.08943	5.3194	0	0	2		13.6878	13.6878	0.0160265	0.137934	3.77481	0.860327	3.77481
274	212	bta-miR-11987_L-1R-2_1ss8TA	215.566	92.7573	59.4492	17.4599	4.08943	5.3194	0	0	2		13.6878	13.6878	0.0160265	0.137934	3.77481	0.860327	3.77481
534	840	mmu-mir-6236-p3_1ss7AG	9.13416	20.3969	27.2703	4.15712	0	0	0	2	1		13.6636	13.6636	0.12859	0.0325565	3.77227	1.48736	3.77227
146	113	hsa-miR-1469_L-4_1ss10GC	570.885	59.2481	0	26.6056	8.17885	14.4384	1	0	1		12.8017	12.8017	0.00178046	0.397187	3.67826	0.401005	3.67826
537	843	mmu-miR-6240_R-6_1ss1CA	1057.74	375.886	233.433	27.437	8.17885	102.588	0	0	2		12.0623	12.0623	0.0253163	0.181578	3.59243	0.740937	3.59243
12	9	dre-miR-27b-3p_L-3R+1	49.3245	6.79897	0	0	5.7252	0	1	2	0	10.3081	9.80288	9.80288	0.0301191	0.390105	3.29321	0.408819	3.29321
513	813	mmu-mir-5098-p3	0	29.6241	17.9984	4.98855	0	0	1	2	0	8.7685	9.54636	9.54636	0.0717963	0.180704	3.25495	0.743033	3.25495
259	202	pal-miR-9995-3p_L+1_2	9.13416	9.22717	3.27243	0	0	2.27974	0	2	1		9.48957	9.48957	0.259142	0.0378094	3.24634	1.4224	3.24634
260	202	pal-miR-9995-3p_L+1_2	9.13416	9.22717	3.27243	0	0	2.27974	0	2	1		9.48957	9.48957	0.259142	0.0378094	3.24634	1.4224	3.24634
261	203	pal-miR-9995-3p_L+1_1	9.13416	9.22717	3.27243	0	0	2.27974	0	2	1		9.48957	9.48957	0.259142	0.0378094	3.24634	1.4224	3.24634
262	203	pal-miR-9995-3p_L+1_1	9.13416	9.22717	3.27243	0	0	2.27974	0	2	1		9.48957	9.48957	0.259142	0.0378094	3.24634	1.4224	3.24634
271	211	bta-miR-11987_L-1_1ss8TA	150.714	89.3579	52.9043	17.4599	3.68048	10.2588	0	0	2		9.33067	9.33067	0.03814	0.0897747	3.22198	1.04685	3.22198
272	211	bta-miR-11987_L-1_1ss8TA	150.714	89.3579	52.9043	17.4599	3.68048	10.2588	0	0	2		9.33067	9.33067	0.03814	0.0897747	3.22198	1.04685	3.22198
480	768	mmu-miR-3072-5p	0	0	5.45405	5.81997	13.0862	28.1168	2	0	1		0.115987	-8.62166	0.142437	0.111706	-3.10797	0.951924	3.10797
280	478	mmu-miR-466n-3p	23.7488	8.74153	9.81729	0	4.90731	0	0	2	1		8.62135	8.62135	0.205551	0.0709556	3.10791	1.14901	3.10791
537	844	mmu-mir-6240-p3_1ss17GT	6750.15	2044.55	2016.91	477.238	259.27	529.66	0	0	2		8.53884	8.53884	0.00552354	0.180137	3.09404	0.744396	3.09404
30	31	tni-miR-128_R+1_1ss22TA	0	4.85641	0	19.9542	5.7252	11.3987	2	0	1		0.130978	-7.63488	0.265729	0.0728848	-2.93261	1.13736	2.93261
269	459	mmu-miR-465b-3p	4.26261	3.56136	1.81802	0	0	1.26652	0	2	1		7.61296	7.61296	0.504619	0.0293315	2.92846	1.53267	2.92846
271	462	mmu-miR-465b-3p	4.26261	3.56136	1.81802	0	0	1.26652	0	2	1		7.61296	7.61296	0.504619	0.0293315	2.92846	1.53267	2.92846
272	464	mmu-miR-465b-3p	4.26261	3.56136	1.81802	0	0	1.26652	0	2	1		7.61296	7.61296	0.504619	0.0293315	2.92846	1.53267	2.92846
378	631	mmu-mir-690-p3	1934.62	990.707	633.943	281.299	53.7078	138.811	0	0	2		7.51189	7.51189	0.0568901	0.0592543	2.90918	1.22728	2.90918
613	928	mmu-miR-7649-3p	0	4.85641	0	19.9542	6.54308	8.35906	2	0	1		0.139326	-7.17739	0.258624	0.0904725	-2.84346	1.04348	2.84346
55	45	ggo-mir-380-p5_1ss7AT	0	2.4282	0	8.31424	4.49837	4.55948	2	0	1		0.139776	-7.1543	0.582983	0.0293044	-2.83881	1.53307	2.83881
56	45	ggo-mir-380-p5_1ss7AT	0	2.4282	0	8.31424	4.49837	4.55948	2	0	1		0.139776	-7.1543	0.582983	0.0293044	-2.83881	1.53307	2.83881
148	260	mmu-miR-196b-5p	40.1903	26.2246	0	143.836	133.315	191.498	1	0	1		0.141715	-7.0564	0.604437	0.00332785	-2.81893	2.47784	2.81893
128	131	hsa-miR-573_L-1	0	15.5405	13.0897	4.15712	0	0	1	2	0	5.46456	6.88703	6.88703	0.152457	0.179408	2.78388	0.746159	2.78388
275	213	bta-miR-11987_L-1R-1_1ss8TA	44.7574	28.1672	38.7238	11.2242	3.27154	1.89979	0	0	2		6.80967	6.80967	0.528804	0.00493782	2.76758	2.30647	2.76758
276	213	bta-miR-11987_L-1R-1_1ss8TA	44.7574	28.1672	38.7238	11.2242	3.27154	1.89979	0	0	2		6.80967	6.80967	0.528804	0.00493782	2.76758	2.30647	2.76758
129	102	hsa-miR-1268a_R+2_1ss10TG	23.7488	0	3.81784	4.15712	0	0	1	2	0	5.2873	6.63119	6.63119	0.0684158	0.356448	2.72927	0.448004	2.72927
130	102	hsa-miR-1268a_R+2_1ss10TG	23.7488	0	3.81784	4.15712	0	0	1	2	0	5.2873	6.63119	6.63119	0.0684158	0.356448	2.72927	0.448004	2.72927
355	598	mmu-miR-669p-3p_R-2	0	0	25.0886	0	0	3.79957	2	2	0	4.8147	6.60302	6.60302	0.0448432	0.486415	2.72313	0.312993	2.72313
6	7	bta-mir-2887-1-p5	252.103	85.4727	154.895	35.7512	8.17885	33.4362	0	0	2		6.36544	6.36544	0.0646223	0.0479897	2.67026	1.31885	2.67026
501	798	mmu-miR-3473e_R-3	116.004	44.6789	16.9076	11.1549	8.38333	9.30895	0	0	2		6.15624	6.15624	0.00152275	0.234911	2.62205	0.629096	2.62205
502	799	mmu-miR-3473b_R-2	116.004	44.6789	16.9076	11.1549	8.38333	9.30895	0	0	2		6.15624	6.15624	0.00152275	0.234911	2.62205	0.629096	2.62205
161	124	bta-mir-2904-2-p3_1ss16TC	42.0171	19.9113	38.7238	3.74141	0	13.2985	0	1	1		5.90685	5.90685	0.496976	0.0246967	2.56239	1.60736	2.56239
496	791	mmu-miR-3470a_L-1R+3	81.294	23.7964	32.7243	0	8.17885	15.1983	0	1	1		5.89528	5.89528	0.113973	0.106803	2.55956	0.971416	2.55956
58	56	xla-miR-212-5p_R+3	12.7878	0	0	40.7398	16.3577	18.2379	2	0	1		0.169745	-5.89118	0.456971	0.0795527	-2.55856	1.09934	2.55856
417	681	mmu-miR-876-5p	12.7878	7.77025	8.72648	4.98855	0	0	0	2	1		5.87036	5.87036	0.922191	0.0232644	2.55345	1.63331	2.55345
333	333	PC-3p-45071_18	9.13416	0	14.1805	0	4.08943	0	1	2	0	4.56735	5.70121	5.70121	0.194779	0.216241	2.51127	0.665062	2.51127
8	9	rno-miR-6328_R+1_1ss17CT	0	0	6.54486	12.4714	6.54308	17.478	2	0	1		0.179348	-5.57574	0.645462	0.0600826	-2.47916	1.22125	2.47916
34	34	PC-5p-30497_36	0	0	5.45405	21.617	4.08943	4.55948	2	0	1		0.180204	-5.54926	0.180861	0.243114	-2.4723	0.61419	2.4723
527	829	mmu-miR-5128_L-5_1ss14CA	14.6147	4.37077	0	1.45499	1.02236	0.949893	1	0	1		5.53956	5.53956	0.00264763	0.353781	2.46977	0.451266	2.46977
63	66	hsa-miR-339-5p_R+2	0	0	14.7259	0	0	2.6597	2	2	0	2.89761	5.53669	5.53669	0.0631812	0.465255	2.46902	0.332309	2.46902
99	78	bta-mir-1246-p5_1ss3CT	0	2.91384	15.2713	3.3257	0	0	1	2	0	3.58515	5.46808	5.46808	0.106213	0.361355	2.45103	0.442066	2.45103
100	79	bta-mir-1246-p3_1ss3CT	0	2.91384	15.2713	3.3257	0	0	1	2	0	3.58515	5.46808	5.46808	0.106213	0.361355	2.45103	0.442066	2.45103
278	215	bta-miR-11987_L-2_1ss8TA	28.3159	9.22717	18.5438	4.98855	0	5.3194	0	1	1		5.44113	5.44113	0.177647	0.0573926	2.44391	1.24114	2.44391
132	132	PC-5p-19082_73	49.3245	45.6502	22.907	10.8085	5.7252	6.07931	0	0	2		5.213	5.213	0.0756964	0.0195995	2.38211	1.70776	2.38211
531	835	mmu-miR-5620-5p_L-3R+1	0	6.79897	0	5.81997	10.6325	18.2379	2	0	1		0.19599	-5.10231	0.564315	0.0948417	-2.35115	1.023	2.35115
507	807	mmu-mir-3535-p3	573.625	474.956	82.9016	23.2799	58.8878	139.824	0	0	2		5.09696	5.09696	0.100557	0.11997	2.34964	0.920926	2.34964
197	201	hsa-miR-4443_R+1	0	7.77025	13.0897	4.15712	0	0	1	2	0	4.16952	5.01789	5.01789	0.234664	0.240758	2.32708	0.618418	2.32708
274	467	mmu-miR-466i-5p_L-1R-1	9.74311	26.0627	20.8163	2.07856	3.27154	6.01599	0	0	2		4.98167	4.98167	0.110941	0.0381047	2.31663	1.41902	2.31663
44	36	pal-miR-339b-5p_R+1	0	2.91384	3.81784	12.8871	6.54308	14.0584	1	0	1		0.201014	-4.97477	0.391592	0.0266302	-2.31463	1.57463	2.31463
47	48	fru-miR-199_R+1_1ss23CA	4.56708	23.3107	2.72703	26.6056	51.5268	72.9518	0	0	2		0.202568	-4.93661	0.388572	0.0545547	-2.30352	1.26317	2.30352
48	50	ola-miR-199a-5p_R+2	4.56708	23.3107	2.72703	26.6056	51.5268	72.9518	0	0	2		0.202568	-4.93661	0.388572	0.0545547	-2.30352	1.26317	2.30352
182	182	PC-3p-18285_78	45.6708	8.74153	75.2659	14.9656	6.54308	5.3194	0	0	2		4.83367	4.83367	0.0484544	0.214522	2.27312	0.668529	2.27312
135	138	cja-miR-582	5.4805	4.37077	0	0	2.04471	0	1	2	0	1.98266	4.81792	4.81792	0.284738	0.223137	2.26841	0.651429	2.26841
136	139	hsa-miR-582-3p	5.4805	4.37077	0	0	2.04471	0	1	2	0	1.98266	4.81792	4.81792	0.284738	0.223137	2.26841	0.651429	2.26841
525	827	mmu-miR-5125_L+1	0	0	15.2713	25.7742	18.8114	28.8767	2	0	1		0.20788	-4.81046	0.509448	0.0302283	-2.26618	1.51959	2.26618
99	178	mmu-miR-133b-3p_R-1	0	0	19.6346	0	4.08943	0	2	2	0	3.954	4.8013	4.8013	0.0831514	0.481556	2.26343	0.317353	2.26343
499	796	mmu-miR-3473a_1ss18AC	145.233	39.3369	24.1796	25.0813	9.13305	9.62558	0	0	2		4.76163	4.76163	0.0371152	0.284674	2.25146	0.545652	2.25146
504	802	mmu-mir-3473f-p3_1ss18GC	145.233	39.3369	24.1796	25.0813	9.13305	9.62558	0	0	2		4.76163	4.76163	0.0371152	0.284674	2.25146	0.545652	2.25146
146	149	hsa-miR-608	9.13416	8.74153	5.45405	0	4.90731	0	0	2	1		4.75408	4.75408	0.674431	0.0377965	2.24917	1.42255	2.24917
447	725	mmu-mir-1934-p3_1ss8TA	70.3331	35.9374	31.6335	8.10639	7.56544	13.4885	0	0	2		4.72917	4.72917	0.0465641	0.0943851	2.24159	1.0251	2.24159
23	23	PC-3p-32800_32	14.6147	9.71281	16.3622	0	4.08943	4.55948	0	1	1		4.70459	4.70459	0.69217	0.0122571	2.23407	1.91161	2.23407
88	93	rno-miR-465-3p_L-1R+1	10.961	7.77025	11.9989	0	6.54308	0	0	2	1		4.69659	4.69659	0.507822	0.0331219	2.23161	1.47989	2.23161
93	74	rno-miR-878	5.4805	3.39948	0	0	0	1.89979	1	2	0	1.79663	4.6742	4.6742	0.271667	0.247137	2.22472	0.607063	2.22472
94	74	rno-miR-878	5.4805	3.39948	0	0	0	1.89979	1	2	0	1.79663	4.6742	4.6742	0.271667	0.247137	2.22472	0.607063	2.22472
146	257	mmu-miR-194-2-3p_R+1	0	6.79897	9.81729	33.257	21.265	22.7974	1	0	1		0.214904	-4.65324	0.745031	0.0131176	-2.21824	1.88215	2.21824
583	895	mmu-miR-7033-5p_L-2R-3_1ss20CT	16.4415	23.3107	7.63567	4.98855	0	5.3194	0	1	1		4.59722	4.59722	0.251534	0.0634749	2.20076	1.1974	2.20076
596	909	mmu-miR-7063-5p	0	4.85641	0	14.1342	4.08943	3.79957	2	0	1		0.220513	-4.53488	0.37002	0.203036	-2.18106	0.692428	2.18106
158	275	mmu-miR-204-5p	0	16.5118	5.45405	0	56.4341	41.7953	1	1	0	20.0325	0.223618	-4.47192	0.152464	0.22196	-2.16089	0.653725	2.16089
32	33	ccr-miR-132a_R+2	0	11.6554	10.9081	34.9198	36.8048	28.8767	1	0	1		0.224286	-4.4586	0.574498	0.00431217	-2.15659	2.3653	2.15659
4	4	ssc-mir-1285-p5	113.264	85.4727	272.703	58.1997	4.08943	44.075	0	0	2		4.43231	4.43231	0.143276	0.114791	2.14806	0.940092	2.14806
71	57	eca-mir-615-p5_1ss15CG	0	0	7.63567	0	0	33.8162	2	2	0	6.90864	0.225799	-4.42871	0.0970239	0.492165	-2.14689	0.307889	2.14689
564	873	mmu-miR-6955-5p	9.13416	0	7.63567	0	0	3.79957	1	2	0	3.42823	4.41361	4.41361	0.334077	0.235445	2.14196	0.62811	2.14196
536	842	mmu-miR-6239_R-2_1ss6TG	0	5.82769	52.3589	0	4.90731	8.35906	1	1	0	11.9088	4.38602	4.38602	0.0419583	0.462194	2.13291	0.335175	2.13291
484	776	mmu-miR-3082-3p_L-1R+1	0	7.77025	0	17.4599	16.3577	0	2	1	0	6.93131	0.229769	-4.35219	0.347797	0.234682	-2.12174	0.62952	2.12174
320	320	PC-3p-19170_73	0	4.85641	6.54486	15.7971	13.9041	19.7578	1	0	1		0.23052	-4.33802	0.87188	0.00829887	-2.11704	2.08098	2.11704
56	56	PC-5p-50778_14	0	0	16.3622	0	0	3.79957	2	2	0	3.36029	4.30632	4.30632	0.102331	0.496103	2.10645	0.304428	2.10645
95	75	bta-mir-1246-p3	5.4805	8.74153	15.2713	2.90999	2.04471	1.89979	0	0	2		4.30278	4.30278	0.0237233	0.118203	2.10527	0.927372	2.10527
96	75	bta-mir-1246-p3	5.4805	8.74153	15.2713	2.90999	2.04471	1.89979	0	0	2		4.30278	4.30278	0.0237233	0.118203	2.10527	0.927372	2.10527
392	651	mmu-mir-712-p5_2	4.56708	0	0	15.7971	0	3.79957	2	1	0	4.02729	0.233054	-4.29084	0.185555	0.372884	-2.10126	0.428426	2.10126
393	652	mmu-mir-712-p5_1	4.56708	0	0	15.7971	0	3.79957	2	1	0	4.02729	0.233054	-4.29084	0.185555	0.372884	-2.10126	0.428426	2.10126
11	8	dno-miR-24b-3p_R-1_1ss20CA	0	4.85641	0	7.48282	5.7252	7.59914	2	0	1		0.233401	-4.28448	0.245964	0.0370797	-2.09912	1.43086	2.09912
426	692	mmu-mir-1187-p5	27.4025	118.496	70.9027	2.07856	14.7219	34.956	0	0	2		4.18887	4.18887	0.233977	0.120824	2.06656	0.917846	2.06656
63	51	hsa-miR-562	6.39391	3.39948	3.81784	0	3.27154	0	0	2	1		4.16049	4.16049	0.848639	0.0745193	2.05676	1.12773	2.05676
64	51	hsa-miR-562	6.39391	3.39948	3.81784	0	3.27154	0	0	2	1		4.16049	4.16049	0.848639	0.0745193	2.05676	1.12773	2.05676
157	121	bta-miR-2478_L-2R+1	0	4.85641	0	7.06711	7.36097	5.69936	2	0	1		0.241283	-4.14451	0.181858	0.0400152	-2.0512	1.39777	2.0512
14	15	oga-miR-28b_R+3	0	0	8.72648	14.1342	9.81463	12.1586	2	0	1		0.241681	-4.13769	0.311114	0.0448624	-2.04883	1.34812	2.04883
618	934	mmu-miR-7658-3p	0	5.82769	9.81729	0	0	3.79957	1	2	0	3.24076	4.11756	4.11756	0.329735	0.274273	2.04179	0.561818	2.04179
549	858	mmu-miR-6901-5p_L+2	0	5.82769	14.1805	0	4.90731	0	1	2	0	4.15259	4.07723	4.07723	0.272894	0.319145	2.02759	0.496011	2.02759
223	175	pal-miR-9226-5p_L-3_1ss15GA	0	0	3.27243	5.81997	4.08943	3.41961	2	0	1		0.245512	-4.07312	0.601197	0.0619749	-2.02614	1.20778	2.02614
224	175	pal-miR-9226-5p_L-3_1ss15GA	0	0	3.27243	5.81997	4.08943	3.41961	2	0	1		0.245512	-4.07312	0.601197	0.0619749	-2.02614	1.20778	2.02614
193	197	bta-miR-2478_L+2	9.13416	32.0523	41.4508	141.342	97.3284	95.7492	0	0	2		0.247106	-4.04684	0.584155	0.00913015	-2.0168	2.03952	2.0168
129	132	hsa-miR-576-3p	9.13416	10.6841	6.54486	6.6514	0	0	0	2	1		3.96355	3.96355	0.457453	0.0598809	1.98679	1.22271	1.98679
457	738	mmu-mir-1954-p3_1ss18AG	741.694	264.674	251.432	56.5369	139.858	121.206	0	0	2		3.96031	3.96031	0.0478467	0.188857	1.98561	0.723868	1.98561
497	793	mmu-mir-3470b-p5_1ss12TC	741.694	264.674	251.432	56.5369	139.858	121.206	0	0	2		3.96031	3.96031	0.0478467	0.188857	1.98561	0.723868	1.98561
233	181	pal-miR-9226-5p_1ss4AG	0	21.8538	31.0881	69.4239	77.2902	60.0332	1	0	1		0.256071	-3.90517	0.453031	0.00809202	-1.96539	2.09194	1.96539
234	181	pal-miR-9226-5p_1ss4AG	0	21.8538	31.0881	69.4239	77.2902	60.0332	1	0	1		0.256071	-3.90517	0.453031	0.00809202	-1.96539	2.09194	1.96539
160	123	bta-mir-2904-2-p3_1ss15TC	63.9391	33.5092	59.9946	4.98855	2.45366	33.0563	0	0	2		3.88763	3.88763	0.973997	0.0465213	1.95889	1.33235	1.95889
162	125	bta-mir-2904-2-p5_1ss15TC	63.9391	33.5092	59.9946	4.98855	2.45366	33.0563	0	0	2		3.88763	3.88763	0.973997	0.0465213	1.95889	1.33235	1.95889
305	519	mmu-miR-483-5p	14.6147	22.3395	20.7254	0	5.7252	9.11897	0	1	1		3.88567	3.88567	0.877429	0.015863	1.95816	1.79961	1.95816
191	327	mmu-miR-300-5p_L-1R+2	0	0	11.9989	0	12.2683	34.1961	2	1	0	9.74389	0.258239	-3.87239	0.275724	0.346287	-1.95322	0.460564	1.95322
76	79	hsa-miR-422a	23.7488	10.6841	14.1805	0	7.36097	5.3194	0	1	1		3.83376	3.83376	0.479894	0.0555646	1.93876	1.2552	1.93876
9	11	hsa-mir-8485-p3	0	17.4831	22.907	0	0	10.6388	1	2	0	8.50481	3.79649	3.79649	0.416816	0.270807	1.92467	0.567341	1.92467
117	123	hsa-miR-549a-3p	0	2.4282	0	3.3257	2.04471	3.79957	2	0	1		0.264799	-3.77645	0.590894	0.0802094	-1.91703	1.09577	1.91703
118	123	hsa-miR-549a-3p	0	2.4282	0	3.3257	2.04471	3.79957	2	0	1		0.264799	-3.77645	0.590894	0.0802094	-1.91703	1.09577	1.91703
18	17	dre-miR-34a_L+1	0	0	18.5438	9.97709	21.265	38.7556	2	0	1		0.26492	-3.77473	0.705636	0.174668	-1.91637	0.757788	1.91637
400	659	mmu-miR-741-3p	14.6147	9.71281	6.54486	0	8.17885	0	0	2	1		3.77465	3.77465	0.851478	0.103346	1.91634	0.985707	1.91634
459	741	rno-miR-1956-3p_L+3R+2	12.7878	0	0	39.9084	0	8.35906	2	1	0	10.1759	0.264937	-3.77448	0.219136	0.410385	-1.91628	0.386808	1.91628
207	357	mmu-miR-335-3p	259.41	130.152	58.9038	6.6514	58.8878	53.9539	0	0	2		3.75307	3.75307	0.149021	0.146635	1.90807	0.833762	1.90807
495	790	mmu-miR-3154	0	0	14.1805	0	0	3.79957	2	2	0	2.99668	3.73214	3.73214	0.133969	0.518514	1.9	0.285239	1.9
471	755	mmu-miR-3057-5p	9.13416	16.5118	25.0886	88.131	47.4374	52.4341	0	0	2		0.269861	-3.70561	0.229219	0.0283012	-1.88971	1.5482	1.88971
238	238	PC-3p-12475_127	0	16.5118	18.5438	49.054	41.7122	36.4759	1	0	1		0.275503	-3.62973	0.55694	0.0112886	-1.85986	1.94736	1.85986
214	170	pal-miR-9226-5p_1ss15GA	4.56708	0	11.4535	21.617	13.4951	22.7974	1	0	1		0.276648	-3.6147	0.871031	0.0344664	-1.85387	1.4626	1.85387
215	170	pal-miR-9226-5p_1ss15GA	4.56708	0	11.4535	21.617	13.4951	22.7974	1	0	1		0.276648	-3.6147	0.871031	0.0344664	-1.85387	1.4626	1.85387
65	68	cja-miR-345_R+2	23.7488	0	7.63567	4.98855	0	3.79957	1	1	0	6.69544	3.57124	3.57124	0.0882993	0.35214	1.83643	0.453285	1.83643
148	115	eca-mir-1543-p5_1ss6AG	91.3416	63.1333	139.624	30.7627	13.0862	38.7556	0	0	2		3.56032	3.56032	0.206786	0.0403761	1.83201	1.39388	1.83201
84	82	efu-miR-2683_L+1R-5_1ss11GA	0	10.6841	10.9081	0	0	6.07931	1	2	0	4.61192	3.55175	3.55175	0.481377	0.278819	1.82853	0.554677	1.82853
33	31	bta-miR-134_R-2	0	14.5692	6.54486	25.7742	34.3512	14.4384	1	0	1		0.283168	-3.53147	0.695996	0.0671448	-1.82027	1.17299	1.82027
139	142	hsa-miR-586	14.6147	0	0	4.15712	0	0	2	2	0	3.12863	3.51557	3.51557	0.149709	0.529132	1.81376	0.276436	1.81376
62	60	ola-miR-222_R+6	197.298	63.1333	122.171	423.195	444.112	474.946	0	0	2		0.285045	-3.50822	0.260704	0.00154286	-1.81074	2.81167	1.81074
341	578	mmu-miR-653-5p_1ss12AT	23.7488	13.5979	7.63567	4.98855	4.08943	3.79957	0	0	2		3.49309	3.49309	0.0115153	0.149931	1.8045	0.824109	1.8045
265	206	hsa-miR-10395-3p_L+3	89.5148	79.1594	29.4519	24.9427	9.81463	22.0375	0	0	2		3.48845	3.48845	0.117675	0.0692856	1.80259	1.15936	1.80259
203	203	PC-3p-25501_49	23.7488	10.6841	9.81729	7.48282	0	5.3194	0	1	1		3.45645	3.45645	0.391507	0.105289	1.78929	0.977616	1.78929
8	6	sha-mir-24-1-p5_1ss1GT	0	4.85641	14.1805	29.9313	17.1756	18.2379	1	0	1		0.291331	-3.43253	0.981964	0.0571695	-1.77927	1.24284	1.77927
102	183	mmu-miR-135a-2-3p_L+1	18.2683	0	7.63567	0	0	7.59914	1	2	0	5.58386	3.40881	3.40881	0.372211	0.357417	1.76927	0.446825	1.76927
274	274	PC-3p-42543_20	0	0	15.2713	0	0	4.55948	2	2	0	3.30514	3.34936	3.34936	0.16369	0.538334	1.74388	0.268948	1.74388
216	171	pal-miR-9226-5p_1ss4AT	0	5.34205	20.18	34.0884	22.0829	29.2567	1	0	1		0.298755	-3.34723	0.500507	0.0457326	-1.74297	1.33977	1.74297
217	171	pal-miR-9226-5p_1ss4AT	0	5.34205	20.18	34.0884	22.0829	29.2567	1	0	1		0.298755	-3.34723	0.500507	0.0457326	-1.74297	1.33977	1.74297
149	116	gga-miR-1623_L-2R+1	18.2683	14.5692	2.72703	0	10.6325	0	0	2	1		3.34489	3.34489	0.727534	0.230183	1.74196	0.637927	1.74196
150	116	gga-miR-1623_L-2R+1	18.2683	14.5692	2.72703	0	10.6325	0	0	2	1		3.34489	3.34489	0.727534	0.230183	1.74196	0.637927	1.74196
294	502	mmu-mir-467f-p3_1ss1GT	0	0	1.36351	0	0	4.55948	2	2	0	0.987166	0.29905	-3.34393	0.164179	0.538652	-1.74154	0.268691	1.74154
200	204	hsa-miR-7704_R-1_1ss16CT	0	0	7.63567	9.97709	4.08943	11.3987	2	0	1		0.299847	-3.33504	0.871827	0.15434	-1.7377	0.811522	1.7377
105	113	ggo-miR-516a	6.39391	8.74153	0	2.49427	2.04471	0	1	1	0	3.27907	3.33454	3.33454	0.158971	0.264257	1.73749	0.577974	1.73749
106	113	ggo-miR-516a	6.39391	8.74153	0	2.49427	2.04471	0	1	1	0	3.27907	3.33454	3.33454	0.158971	0.264257	1.73749	0.577974	1.73749
159	162	ggo-miR-641_R+2	0	7.77025	8.72648	4.98855	0	0	1	2	0	3.58088	3.30692	3.30692	0.531704	0.300035	1.72549	0.522829	1.72549
198	340	mmu-miR-323-5p	0	0	7.63567	9.97709	10.6325	4.55948	2	0	1		0.303375	-3.29625	0.727475	0.140961	-1.72083	0.850902	1.72083
196	200	ssc-miR-4332_L-2_1ss20CA	21.922	0	0	6.6514	0	0	2	2	0	4.76223	3.29585	3.29585	0.168597	0.541519	1.72065	0.266386	1.72065
83	149	mmu-miR-122-5p	9.13416	28.1672	0	59.0311	40.0764	22.7974	1	0	1		0.305987	-3.26811	0.772057	0.102276	-1.70846	0.990227	1.70846
251	251	PC-3p-19249_72	0	0	27.2703	52.3797	11.4504	25.0772	2	0	1		0.306727	-3.26023	0.726652	0.244743	-1.70497	0.61129	1.70497
141	249	mmu-miR-191-3p	9.13416	23.3107	14.1805	59.8626	67.0666	25.0772	0	0	2		0.306734	-3.26016	0.185797	0.0612814	-1.70494	1.21267	1.70494
143	143	PC-3p-23837_54	0	0	11.9989	22.4485	6.54308	9.87888	2	0	1		0.30869	-3.2395	0.811063	0.226976	-1.69577	0.64402	1.69577
75	73	hsa-miR-483-3p	0	0	5.45405	4.15712	6.54308	6.83923	2	0	1		0.310959	-3.21585	0.358069	0.115098	-1.6852	0.938934	1.6852
45	46	bta-miR-197	14.6147	6.79897	6.54486	4.15712	0	4.55948	0	1	1		3.2075	3.2075	0.464822	0.101153	1.68145	0.995019	1.68145
342	342	PC-3p-11657_138	56.6318	38.8512	94.9005	12.4714	8.17885	38.7556	0	0	2		3.20479	3.20479	0.500801	0.0842407	1.68023	1.07448	1.68023
37	30	hsa-miR-320d_R+1	0	2.4282	3.27243	5.40426	4.08943	8.73901	1	0	1		0.31266	-3.19836	0.668821	0.0694805	-1.67733	1.15814	1.67733
38	30	hsa-miR-320d_R+1	0	2.4282	3.27243	5.40426	4.08943	8.73901	1	0	1		0.31266	-3.19836	0.668821	0.0694805	-1.67733	1.15814	1.67733
427	695	mmu-miR-1188-3p_L-2_1ss25CA	0	0	5.45405	8.31424	0	9.11897	2	1	0	3.81454	0.312854	-3.19638	0.56014	0.309713	-1.67644	0.50904	1.67644
101	80	bta-mir-1246-p3_1ss18GA	5.4805	9.22717	13.0897	4.15712	0	4.55948	0	1	1		3.18902	3.18902	0.611281	0.0733413	1.67311	1.13465	1.67311
102	80	bta-mir-1246-p3_1ss18GA	5.4805	9.22717	13.0897	4.15712	0	4.55948	0	1	1		3.18902	3.18902	0.611281	0.0733413	1.67311	1.13465	1.67311
436	706	mmu-miR-1231-5p_L-1	0	7.77025	5.45405	4.15712	0	0	1	2	0	2.8969	3.18112	3.18112	0.531533	0.323745	1.66953	0.489797	1.66953
538	845	mmu-miR-6395_R-3_1ss18GT	0	0	2.72703	2.49427	2.8626	3.03966	2	0	1		0.32478	-3.07901	0.0605636	0.110029	-1.62246	0.958493	1.62246
465	747	mmu-miR-1969	0	0	9.81729	24.1113	0	6.07931	2	1	0	6.66799	0.325177	-3.07525	0.339296	0.440857	-1.6207	0.355703	1.6207
36	35	gga-miR-146c-5p_R-3	0	22.3395	0	30.7627	29.4439	8.35906	2	0	1		0.325811	-3.06926	0.974377	0.212518	-1.61789	0.672604	1.61789
277	214	bta-miR-11987_L-2R-1_1ss8TA	12.7878	9.71281	16.3622	3.3257	3.68048	5.69936	0	0	2		3.05873	3.05873	0.257887	0.013312	1.61293	1.87576	1.61293
194	333	mmu-miR-302c-5p_L-2R+2	9.13416	9.71281	8.72648	9.14567	0	0	0	2	1		3.01492	3.01492	0.0174672	0.180464	1.59212	0.743609	1.59212
251	432	mmu-miR-412-3p_L+1	0	0	7.63567	19.1228	0	3.79957	2	1	0	5.093	0.333111	-3.00201	0.318806	0.468886	-1.58593	0.328933	1.58593
311	530	mmu-miR-488-3p_R+1	14.6147	6.79897	13.0897	5.81997	5.7252	0	0	1	1		2.98855	2.98855	0.785873	0.0672838	1.57945	1.17209	1.57945
66	121	mmu-miR-92b-5p_R-1	0	4.85641	0	5.81997	4.08943	4.55948	2	0	1		0.335645	-2.97934	0.184884	0.132416	-1.57499	0.878058	1.57499
100	180	mmu-miR-134-3p_R+1	0	36.9087	20.7254	39.9084	73.6097	57.7535	1	0	1		0.336507	-2.97171	0.907419	0.0587326	-1.57129	1.23112	1.57129
625	943	mmu-miR-7687-3p_1ss21AT	0	5.82769	7.63567	0	0	4.55948	1	2	0	3.00381	2.95282	2.95282	0.606479	0.342751	1.5621	0.465022	1.5621
567	878	mmu-miR-6970-3p_R+2	0	6.79897	5.45405	4.15712	0	0	1	2	0	2.73502	2.94748	2.94748	0.615308	0.340834	1.55948	0.467456	1.55948
18	14	oni-miR-27e_R-2_1ss18CA	4.56708	3.39948	0	5.81997	11.8593	5.69936	1	0	1		0.340762	-2.9346	0.624294	0.104209	-1.55316	0.982096	1.55316
19	14	oni-miR-27e_R-2_1ss18CA	4.56708	3.39948	0	5.81997	11.8593	5.69936	1	0	1		0.340762	-2.9346	0.624294	0.104209	-1.55316	0.982096	1.55316
187	191	hsa-miR-892b	10.961	9.71281	13.0897	4.15712	7.36097	0	0	1	1		2.93135	2.93135	0.352599	0.0342408	1.55156	1.46546	1.55156
244	419	mmu-miR-381-5p	0	0	10.9081	9.97709	17.9935	3.79957	2	0	1		0.343344	-2.91253	0.87835	0.273761	-1.54227	0.562629	1.54227
271	461	mmu-miR-465c-5p	12.7878	4.85641	6.54486	8.31424	0	0	0	2	1		2.90936	2.90936	0.862048	0.223225	1.5407	0.651257	1.5407
172	172	PC-5p-43351_19	0	7.77025	5.45405	0	0	4.55948	1	2	0	2.96396	2.90039	2.90039	0.606683	0.354329	1.53625	0.450593	1.53625
140	109	hsa-miR-1290_1ss13TG	0	0	5.45405	15.7971	0	0	2	2	0	3.54185	0.345257	-2.89639	0.213013	0.569492	-1.53426	0.244513	1.53426
141	109	hsa-miR-1290_1ss13TG	0	0	5.45405	15.7971	0	0	2	2	0	3.54185	0.345257	-2.89639	0.213013	0.569492	-1.53426	0.244513	1.53426
115	115	PC-3p-56157_11	0	0	11.9989	4.15712	0	0	2	2	0	2.69267	2.88635	2.88635	0.214339	0.570306	1.52925	0.243892	1.52925
326	326	PC-3p-54966_12	0	0	13.0897	0	0	4.55948	2	2	0	2.94153	2.87088	2.87088	0.216405	0.571574	1.52149	0.242928	1.52149
132	233	mmu-miR-182-3p_L-1R+1	32.883	23.3107	21.8162	10.8085	8.99674	7.59914	0	0	2		2.84662	2.84662	0.134005	0.009309	1.50925	2.0311	1.50925
62	114	mmu-miR-33-3p_R-1	23.7488	18.4543	18.5438	9.97709	0	11.3987	0	1	1		2.84185	2.84185	0.384697	0.0302501	1.50683	1.51927	1.50683
401	660	mmu-miR-743a-3p	16.4415	0	0	5.81997	0	0	2	2	0	3.71024	2.82501	2.82501	0.2227	0.575422	1.49826	0.240014	1.49826
374	627	mmu-miR-682	25.5757	13.5979	17.453	4.98855	8.99674	6.07931	0	0	2		2.82221	2.82221	0.206075	0.030797	1.49683	1.51149	1.49683
52	43	hsa-miR-378g	0	2.4282	0	4.15712	0	2.6597	2	1	0	1.54084	0.356207	-2.80735	0.61434	0.373177	-1.48921	0.428085	1.48921
53	43	hsa-miR-378g	0	2.4282	0	4.15712	0	2.6597	2	1	0	1.54084	0.356207	-2.80735	0.61434	0.373177	-1.48921	0.428085	1.48921
370	622	mmu-miR-677-3p_L-5R-3	18.2683	11.6554	31.6335	9.14567	0	12.9185	0	1	1		2.78991	2.78991	0.597498	0.133883	1.48022	0.873275	1.48022
191	146	hsa-mir-4485-p5_1ss18CT	71.2465	43.7077	0	0	35.987	5.3194	1	1	0	26.0434	2.78296	2.78296	0.45238	0.356622	1.47662	0.447792	1.47662
87	91	rno-miR-463-3p	9.13416	8.74153	6.54486	4.98855	0	3.79957	0	1	1		2.77882	2.77882	0.445784	0.0378996	1.47447	1.42137	1.47447
534	839	mmu-mir-6236-p5	622.95	331.207	1220.62	323.424	95.6926	364.759	0	0	2		2.77439	2.77439	0.185336	0.166855	1.47217	0.777661	1.47217
287	223	pma-let-7d_R-3	4.56708	2.91384	2.72703	0	3.68048	0	0	2	1		2.77353	2.77353	0.370206	0.184632	1.47173	0.733693	1.47173
360	605	mmu-mir-669f-p5	28.6813	14.0836	69.7028	4.65598	0	36.0545	0	1	1		2.76262	2.76262	0.632459	0.300554	1.46604	0.522077	1.46604
148	151	hsa-miR-612_L-1	25.5757	14.5692	9.81729	12.4714	5.7252	0	0	1	1		2.74569	2.74569	0.747193	0.146975	1.45717	0.832756	1.45717
140	247	mmu-miR-190b-5p	10.961	27.1959	17.453	49.8855	66.2487	36.4759	0	0	2		0.364392	-2.7443	0.461931	0.0301109	-1.45644	1.52128	1.45644
101	108	rno-miR-509-3p_R-1	0	5.82769	0	5.81997	4.08943	6.07931	2	0	1		0.364488	-2.74358	0.187381	0.172274	-1.45606	0.76378	1.45606
72	58	hsa-miR-620	18.2683	4.37077	4.90865	4.57283	2.45366	3.03966	0	0	2		2.73667	2.73667	0.0379055	0.32786	1.45242	0.484312	1.45242
73	58	hsa-miR-620	18.2683	4.37077	4.90865	4.57283	2.45366	3.03966	0	0	2		2.73667	2.73667	0.0379055	0.32786	1.45242	0.484312	1.45242
520	821	mmu-miR-5114_R+2	10.961	22.3395	46.9048	16.6285	8.99674	3.79957	0	0	2		2.72577	2.72577	0.219662	0.206596	1.44667	0.684878	1.44667
91	89	pol-let-7a-5p_R+2_2	0	6.79897	11.9989	19.9542	12.2683	18.9979	1	0	1		0.367	-2.72479	0.652839	0.0630904	-1.44615	1.20004	1.44615
210	214	pol-let-7a-5p_R+2_1	0	6.79897	11.9989	19.9542	12.2683	18.9979	1	0	1		0.367	-2.72479	0.652839	0.0630904	-1.44615	1.20004	1.44615
190	325	mmu-miR-299b-5p_L+1R+1	6.39391	3.88512	0	4.15712	12.2683	11.3987	1	0	1		0.369429	-2.70688	0.687091	0.139116	-1.43663	0.856622	1.43663
183	140	hsa-miR-4448_1ss6CG	0	5.34205	0	6.23568	3.27154	4.93944	2	0	1		0.369777	-2.70433	0.376782	0.199478	-1.43527	0.700106	1.43527
184	140	hsa-miR-4448_1ss6CG	0	5.34205	0	6.23568	3.27154	4.93944	2	0	1		0.369777	-2.70433	0.376782	0.199478	-1.43527	0.700106	1.43527
36	37	gga-miR-146a-5p_R-1_2ss20GA21TA	10.961	10.6841	0	20.7856	23.7187	13.6785	1	0	1		0.372019	-2.68803	0.811182	0.0599067	-1.42655	1.22252	1.42655
153	153	PC-5p-49666_15	0	0	10.9081	0	4.08943	0	2	2	0	2.49959	2.66739	2.66739	0.246458	0.589761	1.41543	0.229324	1.41543
23	40	mmu-miR-10b-3p_L+1R-1	0	15.5405	11.9989	12.4714	43.3479	17.478	1	0	1		0.375722	-2.66154	0.389131	0.225746	-1.41226	0.64638	1.41226
175	301	mmu-miR-222-5p_L-1R+2	62.1123	26.2246	9.81729	113.074	85.0601	63.0729	0	0	2		0.375772	-2.66119	0.935037	0.0620809	-1.41207	1.20704	1.41207
116	116	PC-3p-37852_25	0	5.82769	0	5.81997	5.7252	3.79957	2	0	1		0.379784	-2.63308	0.205989	0.196841	-1.39675	0.705884	1.39675
40	41	xtr-miR-181b_R+4	0	0	16.3622	13.3028	10.6325	18.2379	2	0	1		0.387975	-2.57749	0.285957	0.217975	-1.36597	0.661593	1.36597
27	27	PC-5p-9753_172	82.2075	76.7312	64.3578	35.7512	22.0829	28.8767	0	0	2		2.57518	2.57518	0.716778	0.00230384	1.36468	2.63755	1.36468
191	147	hsa-mir-4485-p3_1ss15CT	90.4282	43.7077	0	0	42.53	9.87888	1	1	0	31.0908	2.55941	2.55941	0.390016	0.402195	1.35581	0.395563	1.35581
182	312	mmu-miR-297a-5p	4.11037	0	4.90865	1.24714	0	2.27974	1	1	0	2.09098	2.55722	2.55722	0.316258	0.33132	1.35458	0.479752	1.35458
575	887	mmu-miR-7012-5p	0	4.85641	7.63567	0	4.90731	0	1	2	0	2.8999	2.5456	2.5456	0.699156	0.412501	1.34801	0.384575	1.34801
368	618	mmu-miR-675-3p_L-1	0	14.5692	0	0	5.7252	0	2	2	0	3.3824	2.54475	2.54475	0.267531	0.60227	1.34753	0.220209	1.34753
17	18	cli-miR-30e-5p_R+1_1ss24TA	0	2.91384	0	0	2.45366	4.93944	2	1	0	1.71782	0.39413	-2.53723	0.633871	0.435628	-1.34326	0.360884	1.34326
18	18	cli-miR-30e-5p_R+1_1ss24TA	0	2.91384	0	0	2.45366	4.93944	2	1	0	1.71782	0.39413	-2.53723	0.633871	0.435628	-1.34326	0.360884	1.34326
375	628	mmu-miR-683	45.6708	19.4256	23.9978	11.6399	13.9041	9.87888	0	0	2		2.51516	2.51516	0.0405852	0.15513	1.33065	0.809304	1.33065
184	314	mmu-mir-297a-3-p5	5.38916	0.485641	6.98119	1.74599	0	3.37816	0	1	1		2.5089	2.5089	0.398727	0.303451	1.32705	0.517912	1.32705
185	316	mmu-mir-297a-4-p5	5.38916	0.485641	6.98119	1.74599	0	3.37816	0	1	1		2.5089	2.5089	0.398727	0.303451	1.32705	0.517912	1.32705
186	318	mmu-mir-297a-2-p5	5.38916	0.485641	6.98119	1.74599	0	3.37816	0	1	1		2.5089	2.5089	0.398727	0.303451	1.32705	0.517912	1.32705
273	465	mmu-mir-466f-2-p5	5.38916	0.485641	6.98119	1.74599	0	3.37816	0	1	1		2.5089	2.5089	0.398727	0.303451	1.32705	0.517912	1.32705
277	471	mmu-mir-466f-1-p5	5.38916	0.485641	6.98119	1.74599	0	3.37816	0	1	1		2.5089	2.5089	0.398727	0.303451	1.32705	0.517912	1.32705
278	473	mmu-mir-466f-3-p5	5.38916	0.485641	6.98119	1.74599	0	3.37816	0	1	1		2.5089	2.5089	0.398727	0.303451	1.32705	0.517912	1.32705
292	498	mmu-miR-466m-5p	5.38916	0.485641	6.98119	1.74599	0	3.37816	0	1	1		2.5089	2.5089	0.398727	0.303451	1.32705	0.517912	1.32705
232	401	rno-miR-374-3p_2ss8CG19TC	52.9781	43.7077	22.907	20.7856	16.3577	10.6388	0	0	2		2.50288	2.50288	0.196775	0.062877	1.32359	1.20151	1.32359
29	30	pma-miR-125-5p_R+2	417.431	403.082	424.871	979.418	1246.46	862.882	0	0	2		0.403199	-2.48017	0.00632431	0.0321385	-1.31044	1.49297	1.31044
27	26	dre-miR-107a-3p_R-2_1ss20AT	9.13416	11.1697	0	16.2128	21.674	12.1586	1	0	1		0.40571	-2.46482	0.78365	0.0875476	-1.30148	1.05776	1.30148
573	885	mmu-miR-7009-5p	0	0	13.0897	0	0	5.3194	2	2	0	3.06819	2.46075	2.46075	0.283475	0.611621	1.2991	0.213517	1.2991
241	188	pal-miR-9226-5p_L-3_1ss4AT	0	9.71281	16.9076	25.7742	17.1756	22.4175	1	0	1		0.407243	-2.45553	0.413771	0.0786894	-1.29604	1.10408	1.29604
103	111	hsa-miR-512-3p	25.5757	5.82769	13.0897	9.97709	8.17885	0	0	1	1		2.45061	2.45061	0.441683	0.250189	1.29314	0.601732	1.29314
10	12	efu-mir-9277-p5	18.2683	5.82769	5.45405	8.31424	0	3.79957	0	1	1		2.43937	2.43937	0.491399	0.29675	1.28651	0.52761	1.28651
3	3	gmo-miR-10d-5p_L-1R+3	20.0952	5.82769	0	0	10.6325	0	1	2	0	6.09256	2.43807	2.43807	0.521306	0.503545	1.28574	0.297962	1.28574
58	47	hsa-miR-514a-3p	34.7098	20.3969	21.8162	10.8085	4.90731	15.9582	0	0	2		2.42858	2.42858	0.659254	0.0534033	1.28011	1.27243	1.28011
275	469	mmu-mir-466k-p5	46.0362	48.7259	88.1738	12.7485	14.4493	48.9511	0	0	2		2.40234	2.40234	0.857081	0.119388	1.26444	0.92304	1.26444
283	482	mmu-miR-466i-5p_L-2	46.0362	48.7259	88.1738	12.7485	14.4493	48.9511	0	0	2		2.40234	2.40234	0.857081	0.119388	1.26444	0.92304	1.26444
1	1	hsa-miR-302a-5p_L-3R+2	12.7878	11.6554	13.0897	9.14567	6.54308	0	0	1	1		2.39235	2.39235	0.0502116	0.0574244	1.25843	1.2409	1.25843
173	176	rno-miR-743a-3p	23.7488	16.5118	13.0897	7.48282	6.54308	8.35906	0	0	2		2.38331	2.38331	0.0541871	0.0316659	1.25297	1.49941	1.25297
3	2	oni-miR-10c_L-1R+3_1ss16GA	14.6147	7.77025	0	4.15712	28.626	20.5177	1	0	1		0.419973	-2.3811	0.512089	0.284355	-1.25163	0.54614	1.25163
585	897	mmu-miR-7036b-5p	0	4.85641	0	6.6514	4.90731	0	2	1	0	2.73585	0.420151	-2.3801	0.795879	0.433104	-1.25102	0.363408	1.25102
179	183	rno-miR-880-3p	0	6.79897	0	6.6514	5.7252	3.79957	2	0	1		0.420308	-2.37921	0.241535	0.265558	-1.25048	0.575841	1.25048
451	730	mmu-mir-1946a-p3_1ss8TC	0	7.77025	11.9989	8.31424	0	0	1	2	0	4.68057	2.37775	2.37775	0.767039	0.441615	1.24959	0.354956	1.24959
419	684	mmu-miR-878-5p	32.883	16.5118	14.1805	13.3028	7.36097	6.07931	0	0	2		2.37726	2.37726	0.250229	0.12273	1.2493	0.911049	1.2493
23	18	xtr-miR-93b_L+2R+1	0	12.6267	0	0	0	5.3194	2	2	0	2.99101	2.3737	2.3737	0.301457	0.622066	1.24714	0.206163	1.24714
20	15	oni-miR-27e_R-1_1ss20GA	0	13.5979	7.63567	11.6399	19.6293	18.9979	1	0	1		0.422416	-2.36733	0.596121	0.108404	-1.24326	0.964957	1.24326
35	34	gmo-miR-145-5p_R+1	23.7488	9.71281	18.5438	39.9084	26.1723	56.9936	0	0	2		0.422553	-2.36657	0.348707	0.0731904	-1.2428	1.13555	1.2428
450	729	mmu-miR-1945_R-1	12.7878	8.74153	16.3622	51.5483	11.4504	26.597	0	0	2		0.422917	-2.36453	0.0684887	0.220965	-1.24155	0.655677	1.24155
343	581	mmu-miR-664-5p_R+1	358.059	380.742	537.769	162.959	162.759	215.056	0	0	2		2.36064	2.36064	0.173213	0.0142778	1.23918	1.84534	1.23918
432	701	mmu-miR-1195_R-5_1ss1TC	98.649	318.58	266.158	133.028	53.1626	103.348	0	0	2		2.36026	2.36026	0.219841	0.135223	1.23895	0.868949	1.23895
119	212	mmu-miR-149-3p	21.922	16.5118	56.7221	9.14567	11.4504	19.7578	0	0	2		2.35804	2.35804	0.12282	0.232807	1.23759	0.633005	1.23759
435	705	mmu-miR-1199-5p	0	6.79897	0	4.15712	6.54308	5.3194	2	0	1		0.424415	-2.35618	0.169142	0.264208	-1.23645	0.578053	1.23645
31	31	PC-3p-12923_121	89.5148	38.8512	55.6313	32.4256	27.8081	18.2379	0	0	2		2.34476	2.34476	0.145777	0.0854428	1.22944	1.06832	1.22944
622	939	mmu-miR-7676-3p_1ss22AT	0	0	16.3622	20.7856	8.99674	8.35906	2	0	1		0.428987	-2.33107	0.708606	0.345054	-1.221	0.462113	1.221
368	617	mmu-miR-675-5p	21.922	21.3682	14.1805	9.14567	5.7252	9.87888	0	0	2		2.32207	2.32207	0.41715	0.0176661	1.21541	1.75286	1.21541
442	717	mmu-miR-1843a-3p	21.922	18.4543	69.8119	64.8511	98.9641	91.9496	0	0	2		0.430818	-2.32116	0.565211	0.068196	-1.21485	1.16624	1.21485
331	562	mmu-miR-542-5p	0	6.79897	5.45405	9.97709	13.9041	4.55948	1	0	1		0.430828	-2.32111	0.741221	0.189208	-1.21482	0.723061	1.21482
521	822	mmu-miR-5116_L+1	0	0	9.81729	10.8085	7.36097	4.55948	2	0	1		0.431929	-2.3152	0.46739	0.313741	-1.21114	0.503428	1.21114
289	493	mmu-miR-466p-5p_L-2R+4	0	0.809401	0	1.8707	0	0	2	2	0	0.446684	0.432672	-2.31122	0.315371	0.630082	-1.20866	0.200603	1.20866
99	106	hsa-miR-509-3p_R+1	0	4.85641	6.54486	2.49427	2.45366	0	1	1	0	2.72487	2.30425	2.30425	0.300401	0.369272	1.2043	0.432654	1.2043
100	106	hsa-miR-509-3p_R+1	0	4.85641	6.54486	2.49427	2.45366	0	1	1	0	2.72487	2.30425	2.30425	0.300401	0.369272	1.2043	0.432654	1.2043
182	139	hsa-miR-4448_R-2_1ss6CG	0	2.4282	2.72703	3.74141	2.04471	6.07931	1	0	1		0.434474	-2.30163	0.705598	0.198749	-1.20266	0.701696	1.20266
443	719	mmu-miR-1843b-3p_L+1R+1	25.5757	31.081	75.2659	103.097	100.6	97.269	0	0	2		0.438331	-2.28138	0.0227801	0.0682306	-1.18991	1.16602	1.18991
53	56	ola-miR-222_R+7	42.0171	14.5692	26.1794	52.3797	72.7918	63.0729	0	0	2		0.439672	-2.27442	0.708941	0.0237735	-1.1855	1.62391	1.1855
96	173	mmu-miR-132-3p	548.05	565.286	889.01	1617.12	1592.42	1319.97	0	0	2		0.442066	-2.2621	0.848601	0.00449604	-1.17767	2.34717	1.17767
24	19	hsa-miR-95-3p	20.0952	11.6554	15.2713	6.6514	6.54308	7.59914	0	0	2		2.26136	2.26136	0.0369565	0.0674977	1.17719	1.17071	1.17719
48	46	bta-miR-185_L+1	9.13416	5.82769	0	6.6514	0	0	1	2	0	3.60221	2.24943	2.24943	0.816219	0.46947	1.16956	0.328392	1.16956
189	323	mmu-miR-299a-5p	271.285	425.421	494.137	526.292	1273.45	878.461	0	0	2		0.444643	-2.249	0.170539	0.0929357	-1.16928	1.03182	1.16928
50	48	cfa-miR-194_R+2	204.605	166.089	119.989	340.053	408.943	354.12	0	0	2		0.444816	-2.24812	0.849379	0.00318694	-1.16872	2.49663	1.16872
2	2	dre-miR-7a_R+3	21.922	7.77025	0	19.1228	22.9008	24.3173	1	0	1		0.447571	-2.23428	0.110296	0.137916	-1.15981	0.860386	1.15981
296	504	mmu-miR-467d-5p_L+1R-1	42.0171	22.3395	58.9038	76.491	102.236	95.7492	0	0	2		0.449075	-2.2268	0.697386	0.0182999	-1.15497	1.73755	1.15497
370	621	mmu-miR-677-5p	76.727	33.0236	45.814	20.7856	13.0862	36.4759	0	0	2		2.21137	2.21137	0.439259	0.125192	1.14494	0.902422	1.14494
541	849	mmu-miR-6516-3p_L-3R+2	0	0	35.9967	0	4.90731	11.3987	2	1	0	8.71713	2.20757	2.20757	0.140727	0.625802	1.14246	0.203563	1.14246
133	104	ppy-mir-1268-p5_1ss8GA_2	0	2.4282	3.81784	7.06711	3.27154	3.41961	1	0	1		0.453985	-2.20272	0.893702	0.207899	-1.13928	0.682148	1.13928
134	104	ppy-mir-1268-p5_1ss8GA_2	0	2.4282	3.81784	7.06711	3.27154	3.41961	1	0	1		0.453985	-2.20272	0.893702	0.207899	-1.13928	0.682148	1.13928
135	105	ppy-mir-1268-p5_1ss8GA_1	0	2.4282	3.81784	7.06711	3.27154	3.41961	1	0	1		0.453985	-2.20272	0.893702	0.207899	-1.13928	0.682148	1.13928
516	817	mmu-miR-5103_R+1	0	8.74153	21.8162	29.9313	21.265	15.9582	1	0	1		0.455036	-2.19763	0.584277	0.180741	-1.13595	0.742943	1.13595
379	633	mmu-miR-692	8.22075	3.88512	5.99946	4.15712	4.08943	0	0	1	1		2.1955	2.1955	0.906649	0.151851	1.13455	0.818581	1.13455
380	635	mmu-miR-692	8.22075	3.88512	5.99946	4.15712	4.08943	0	0	1	1		2.1955	2.1955	0.906649	0.151851	1.13455	0.818581	1.13455
154	119	bta-miR-2478_L-2	506.946	405.996	397.6	1315.73	971.648	587.794	0	0	2		0.455814	-2.19388	0.054333	0.0706917	-1.13348	1.15063	1.13348
155	119	bta-miR-2478_L-2	506.946	405.996	397.6	1315.73	971.648	587.794	0	0	2		0.455814	-2.19388	0.054333	0.0706917	-1.13348	1.15063	1.13348
228	393	mmu-miR-365-3p	1795.78	1484.6	1860.38	3302	4462.79	3491.43	0	0	2		0.456704	-2.1896	0.188556	0.00570815	-1.13067	2.2435	1.13067
229	395	mmu-miR-365-3p	1795.78	1484.6	1860.38	3302	4462.79	3491.43	0	0	2		0.456704	-2.1896	0.188556	0.00570815	-1.13067	2.2435	1.13067
163	281	mmu-miR-212-5p	80.3806	97.1281	66.5394	264.393	156.216	111.707	0	0	2		0.458464	-2.18119	0.0733116	0.105988	-1.12512	0.974744	1.12512
165	285	mmu-miR-215-5p_R+1	29.2293	10.6841	16.3622	44.8969	42.53	34.956	0	0	2		0.459832	-2.17471	0.459941	0.0243456	-1.12082	1.61358	1.12082
136	136	PC-3p-32430_33	0	5.82769	6.54486	11.6399	11.4504	3.79957	1	0	1		0.460119	-2.17335	0.78348	0.2177	-1.11992	0.662142	1.11992
202	158	hsa-mir-7705-p3_1ss5TA	0	0	9.81729	9.14567	0	12.1586	2	1	0	5.18693	0.460813	-2.17008	0.889699	0.478752	-1.11775	0.319889	1.11775
199	155	oni-miR-7550	144.32	130.637	305.972	639.365	348.828	270.529	0	0	2		0.461523	-2.16674	0.402344	0.146271	-1.11553	0.834841	1.11553
74	59	hsa-miR-626	10.0476	9.71281	3.81784	2.90999	5.31626	2.6597	0	0	2		2.16593	2.16593	0.298214	0.125955	1.11499	0.899783	1.11499
75	59	hsa-miR-626	10.0476	9.71281	3.81784	2.90999	5.31626	2.6597	0	0	2		2.16593	2.16593	0.298214	0.125955	1.11499	0.899783	1.11499
391	650	mmu-mir-709-p3_1ss3GT	76.727	324.408	231.252	84.8053	60.5235	146.663	0	0	2		2.16577	2.16577	0.223876	0.212871	1.11488	0.671883	1.11488
338	573	mmu-miR-598-3p_R+1	120.571	135.008	128.716	174.599	344.33	312.325	0	0	2		0.462307	-2.16306	0.0128009	0.102587	-1.11308	0.988908	1.11308
231	398	mmu-mir-370-p5	0	11.6554	19.6346	26.6056	15.5398	25.0772	1	0	1		0.465468	-2.14838	0.538844	0.146963	-1.10325	0.832793	1.10325
127	127	PC-3p-52210_13	0	0	6.54486	8.31424	5.7252	0	2	1	0	3.43072	0.466177	-2.14511	0.881936	0.489362	-1.10105	0.31037	1.10105
372	625	mmu-miR-679-3p_L-2R+1	29.2293	17.4831	27.2703	49.054	65.4308	44.075	0	0	2		0.466591	-2.1432	0.481627	0.0189745	-1.09977	1.72183	1.09977
363	363	PC-3p-29221_39	9.13416	10.6841	11.9989	9.14567	5.7252	0	0	1	1		2.13956	2.13956	0.175679	0.113219	1.09732	0.946082	1.09732
185	141	hsa-mir-4454-p3_1ss20AT	0	0	4.36324	0	2.04471	0	2	2	0	1.06799	2.13391	2.13391	0.360128	0.655537	1.0935	0.183403	1.0935
176	180	cpo-miR-769-3p	12.7878	7.77025	7.63567	8.31424	4.90731	0	0	1	1		2.13241	2.13241	0.66097	0.165852	1.09248	0.780278	1.09248
171	296	mmu-miR-219a-1-3p	10.961	14.5692	9.81729	16.6285	34.3512	24.3173	0	0	2		0.469441	-2.13019	0.144511	0.0667828	-1.09098	1.17534	1.09098
152	155	hsa-miR-629-5p	0	0	8.72648	6.6514	7.36097	4.55948	2	0	1		0.469877	-2.12822	0.154249	0.339398	-1.08965	0.469291	1.08965
253	253	PC-5p-32576_33	0	6.79897	14.1805	0	0	9.87888	1	2	0	5.14306	2.12367	2.12367	0.785474	0.52015	1.08656	0.283872	1.08656
72	75	hsa-miR-372-3p	40.1903	18.4543	18.5438	16.6285	10.6325	9.11897	0	0	2		2.12173	2.12173	0.182752	0.147382	1.08524	0.831556	1.08524
190	190	PC-3p-42057_21	0	5.82769	0	4.98855	7.36097	0	2	1	0	3.02953	0.471896	-2.11911	0.890094	0.496808	-1.08346	0.303811	1.08346
147	259	mmu-miR-195a-3p_R+2	9.13416	12.6267	0	20.7856	13.9041	11.3987	1	0	1		0.472154	-2.11795	0.714431	0.159218	-1.08267	0.798008	1.08267
142	250	mmu-miR-192-5p	1076	937.286	688.301	2278.1	1989.1	1451.44	0	0	2		0.472419	-2.11677	0.35968	0.0197705	-1.08186	1.70398	1.08186
163	282	mmu-miR-212-3p	94.9953	40.7938	101.445	160.465	207.743	133.745	0	0	2		0.472623	-2.11585	0.882856	0.0380918	-1.08124	1.41917	1.08124
514	814	mmu-miR-5099_L+2R-1	45780.4	30641	35387	22246.4	15125.2	15614.7	0	0	2		2.11014	2.11014	0.417574	0.0175232	1.07734	1.75639	1.07734
156	156	PC-3p-43508_19	0	0	5.45405	0	11.4504	0	2	2	0	2.81741	0.47632	-2.09943	0.36985	0.661009	-1.07	0.179793	1.07
175	178	cja-miR-767	16.4415	27.1959	8.72648	9.14567	8.99674	6.83923	0	0	2		2.09609	2.09609	0.0379892	0.228818	1.0677	0.64051	1.0677
322	547	mmu-miR-503-5p	416.518	853.756	551.95	241.113	274.81	363.239	0	0	2		2.07268	2.07268	0.147129	0.0792623	1.0515	1.10093	1.0515
255	438	mmu-miR-429-3p	9.13416	16.5118	0	7.48282	4.90731	0	1	1	0	6.33935	2.06987	2.06987	0.348777	0.447824	1.04954	0.348893	1.04954
146	256	mmu-miR-194-5p_R+1	1196.58	1176.71	907.554	2711.69	2182.53	1896.37	0	0	2		0.483145	-2.06977	0.264358	0.0103118	-1.04947	1.98666	1.04947
240	240	PC-3p-49048_15	0	0	5.45405	11.2242	0	0	2	2	0	2.77971	0.485918	-2.05796	0.382029	0.667838	-1.04122	0.175329	1.04122
91	96	hsa-miR-492	34.7098	18.4543	8.72648	14.9656	9.81463	5.3194	0	0	2		2.05619	2.05619	0.238185	0.259666	1.03997	0.585585	1.03997
258	444	mmu-miR-434-3p	3061.77	4177.48	3513.5	5064.21	10226	6772.35	0	0	2		0.487375	-2.05181	0.0871253	0.0721021	-1.0369	1.14205	1.0369
266	454	mmu-miR-452-5p_L+3R-3	74.9001	43.7077	33.8151	34.9198	21.265	18.2379	0	0	2		2.04807	2.04807	0.293192	0.124361	1.03426	0.905314	1.03426
190	194	ppy-miR-1268_2ss10TG17CG	9.13416	12.6267	0	0	0	10.6388	1	2	0	5.39994	2.04542	2.04542	0.940397	0.513093	1.0324	0.289804	1.0324
587	900	mmu-miR-7039-5p_R+2	0	7.77025	0	0	0	3.79957	2	2	0	1.9283	2.04503	2.04503	0.385939	0.670026	1.03212	0.173909	1.03212
252	252	PC-3p-28021_42	0	0	15.2713	14.9656	4.08943	12.1586	2	0	1		0.489251	-2.04394	0.581663	0.428977	-1.03135	0.367566	1.03135
92	97	chi-miR-493-3p	10.0476	6.79897	5.45405	2.90999	6.13414	1.89979	0	0	2		2.03772	2.03772	0.934446	0.112654	1.02695	0.948255	1.02695
93	98	bta-miR-493	10.0476	6.79897	5.45405	2.90999	6.13414	1.89979	0	0	2		2.03772	2.03772	0.934446	0.112654	1.02695	0.948255	1.02695
112	87	cgr-miR-1260_L-1R+1	22.8354	16.0261	22.907	10.3928	13.9041	6.07931	0	0	2		2.03345	2.03345	0.991629	0.0311897	1.02393	1.50599	1.02393
247	194	cja-miR-9933_L-4	45.6708	12.141	45.2686	10.8085	17.1756	22.7974	0	0	2		2.02988	2.02988	0.177115	0.208489	1.02139	0.680916	1.02139
109	85	cgr-miR-1260_R+1_1	232.008	272.93	430.87	138.848	154.58	167.941	0	0	2		2.02833	2.02833	0.0377361	0.11826	1.02029	0.927161	1.02029
110	86	cgr-miR-1260_R+1_2	232.008	272.93	430.87	138.848	154.58	167.941	0	0	2		2.02833	2.02833	0.0377361	0.11826	1.02029	0.927161	1.02029
111	86	cgr-miR-1260_R+1_2	232.008	272.93	430.87	138.848	154.58	167.941	0	0	2		2.02833	2.02833	0.0377361	0.11826	1.02029	0.927161	1.02029
115	204	mmu-miR-146a-3p_L+1R-1	21.922	23.3107	21.8162	9.97709	14.7219	8.35906	0	0	2		2.02822	2.02822	0.119599	0.00452371	1.02021	2.3445	1.02021
419	685	mmu-miR-878-3p	27.4025	15.5405	14.1805	12.4714	7.36097	8.35906	0	0	2		2.02628	2.02628	0.243627	0.0977299	1.01883	1.00997	1.01883
152	267	mmu-miR-200a-5p	31.0562	20.3969	18.5438	14.9656	8.99674	10.6388	0	0	2		2.02296	2.02296	0.345042	0.0512268	1.01647	1.2905	1.01647
485	778	mmu-miR-3084-3p_R+1	0	4.85641	0	0	9.81463	0	2	2	0	2.44517	0.494813	-2.02097	0.393368	0.674173	-1.01504	0.171228	1.01504
28	27	sha-miR-125a_R+1	937.165	898.435	938.097	1888.16	2083.97	1607.98	0	0	2		0.497068	-2.0118	0.0177434	0.0203394	-1.00848	1.69166	1.00848
447	724	mmu-miR-1934-5p	51.1513	36.9087	85.0832	34.0884	15.5398	36.4759	0	0	2		2.01086	2.01086	0.35315	0.139191	1.00781	0.856388	1.00781
143	252	mmu-miR-193a-3p_R-2	10.961	0	6.54486	0	4.90731	3.79957	1	1	0	4.36879	2.01058	2.01058	0.357703	0.45082	1.00761	0.345997	1.00761
279	475	mmu-miR-466d-5p_L-1R+1	0	0	3.81784	0	0	1.89979	2	2	0	0.952937	2.00961	2.00961	0.39694	0.676164	1.00692	0.169948	1.00692
280	477	mmu-miR-466d-5p_L-1R+1	0	0	3.81784	0	0	1.89979	2	2	0	0.952937	2.00961	2.00961	0.39694	0.676164	1.00692	0.169948	1.00692
456	736	mmu-miR-1953_R+1	0	0	7.63567	0	0	3.79957	2	2	0	1.90587	2.00961	2.00961	0.39694	0.676164	1.00692	0.169948	1.00692
172	175	rno-miR-741-3p_L+2R-1	20.0952	11.6554	5.45405	7.48282	5.7252	5.3194	0	0	2		2.00808	2.00808	0.0477995	0.278692	1.00582	0.554875	1.00582
84	150	mmu-miR-125b-5p	181715	189488	191707	357953	457200	314978	0	0	2		0.498093	-2.00766	0.0102949	0.0455483	-1.00551	1.34153	1.00551
86	154	mmu-miR-125b-5p	181715	189488	191707	357953	457200	314978	0	0	2		0.498093	-2.00766	0.0102949	0.0455483	-1.00551	1.34153	1.00551
229	394	mmu-miR-365-1-5p	25.5757	30.1097	17.453	0	13.0862	23.5573	0	1	1		1.99594	1.99594	0.455821	0.191814	0.99707	0.71712	0.99707
500	797	mmu-miR-3473g_R+2	10.961	11.6554	28.3611	9.97709	5.7252	9.87888	0	0	2		1.99277	1.99277	0.114435	0.221936	0.994776	0.653772	0.994776
29	51	mmu-miR-18a-5p	469.496	236.993	335.97	184.576	134.951	203.657	0	0	2		1.99253	1.99253	0.169162	0.0698108	0.994598	1.15608	0.994598
50	53	ccr-miR-214_L-1R+7	0	4.85641	5.45405	0	0	20.5177	1	2	0	5.13802	0.502516	-1.98999	0.119889	0.654769	-0.992759	0.183912	0.992759
610	925	mmu-miR-7219-3p	18.2683	8.74153	9.81729	41.5712	17.9935	13.6785	0	0	2		0.502807	-1.98884	0.215502	0.256475	-0.991924	0.590956	0.991924
123	127	hsa-miR-555	49.3245	17.4831	22.907	18.2913	14.7219	12.1586	0	0	2		1.98607	1.98607	0.0633128	0.211585	0.989916	0.674516	0.989916
58	58	PC-3p-28062_42	0	8.74153	7.63567	18.2913	4.08943	9.87888	1	0	1		0.507668	-1.96979	0.615225	0.345504	-0.978042	0.461546	0.978042
455	735	mmu-miR-1949_L-1	29.2293	10.6841	25.0886	9.97709	4.08943	18.9979	0	0	2		1.96592	1.96592	0.746089	0.208037	0.975208	0.68186	0.975208
371	623	mmu-miR-678	42.0171	27.1959	25.0886	14.9656	17.1756	15.9582	0	0	2		1.96056	1.96056	0.0283808	0.0996521	0.971263	1.00151	0.971263
12	20	mmu-let-7a-1-3p	60.8944	54.068	67.6302	23.8342	31.6249	37.9957	0	0	2		1.95381	1.95381	0.955125	0.00632045	0.966288	2.19925	0.966288
281	281	PC-3p-26030_47	0	0	14.1805	14.1342	8.17885	5.3194	2	0	1		0.513184	-1.94862	0.46357	0.452475	-0.962453	0.344406	0.962453
110	116	hsa-miR-520a-3p	16.4415	14.5692	6.54486	7.48282	5.7252	6.07931	0	0	2		1.94716	1.94716	0.0606286	0.119411	0.961373	0.922956	0.961373
632	951	mmu-miR-8111_L-1R+2	0	6.79897	0	9.14567	4.08943	0	2	1	0	3.33901	0.513707	-1.94663	0.846691	0.571264	-0.960981	0.243163	0.960981
633	952	mmu-miR-8112_R+2	343.445	236.021	579.22	203.699	131.68	259.891	0	0	2		1.94649	1.94649	0.236363	0.156839	0.960876	0.804546	0.960876
314	533	mmu-miR-493-5p_R+3	122.398	171.917	124.352	234.462	371.32	208.976	0	0	2		0.513854	-1.94608	0.187037	0.0672094	-0.960569	1.17257	0.960569
620	936	mmu-miR-7667-5p	0	0	7.63567	8.31424	6.54308	0	2	1	0	3.74883	0.513933	-1.94578	0.99339	0.538992	-0.960348	0.268418	0.960348
312	531	mmu-miR-490-3p	54.805	13.5979	22.907	18.2913	18.8114	9.87888	0	0	2		1.94353	1.94353	0.102154	0.312892	0.958676	0.504605	0.958676
65	52	hsa-miR-569	10.961	8.74153	16.3622	8.31424	5.7252	4.55948	0	0	2		1.93907	1.93907	0.387645	0.0820299	0.955367	1.08603	0.955367
405	666	mmu-miR-760-3p_R+2	73.0733	115.582	137.442	89.7938	26.9902	51.6742	0	0	2		1.93578	1.93578	0.966103	0.116221	0.952914	0.934716	0.952914
535	841	mmu-miR-6238_L-1R-2_1ss12TC	180.856	270.016	440.687	254.416	49.0731	157.302	0	0	2		1.93485	1.93485	0.75414	0.211286	0.952218	0.675128	0.952218
212	212	PC-3p-40666_22	0	0	6.54486	5.81997	0	6.83923	2	1	0	3.20068	0.517004	-1.93422	0.976192	0.540465	-0.951751	0.267232	0.951751
51	54	oni-miR-218a_R+2	23.7488	87.4153	16.3622	50.7169	92.4211	103.348	0	0	2		0.517377	-1.93283	0.671546	0.225176	-0.950713	0.647478	0.950713
26	21	aca-miR-125a-3p_R-2	0	4.37077	5.99946	3.3257	2.04471	0	1	1	0	2.62344	1.93099	1.93099	0.452409	0.459041	0.949342	0.338148	0.949342
27	21	aca-miR-125a-3p_R-2	0	4.37077	5.99946	3.3257	2.04471	0	1	1	0	2.62344	1.93099	1.93099	0.452409	0.459041	0.949342	0.338148	0.949342
59	62	cpo-miR-328-3p_1ss21GT	0	6.79897	5.45405	9.97709	0	13.6785	1	1	0	5.98476	0.517977	-1.93059	0.411407	0.453568	-0.949041	0.343358	0.949041
472	757	mmu-miR-3058-5p_R-1_1ss22GT	0	7.77025	9.81729	0	0	9.11897	1	2	0	4.45109	1.92868	1.92868	0.983607	0.544144	0.947611	0.264286	0.947611
72	70	cpo-miR-424-5p_R-1	23.7488	15.5405	5.45405	5.81997	10.6325	6.83923	0	0	2		1.921	1.921	0.142288	0.26264	0.941857	0.580639	0.941857
86	68	hsa-miR-645	38.3635	31.081	32.7243	19.1228	21.265	12.9185	0	0	2		1.91664	1.91664	0.874127	0.00814405	0.938576	2.08916	0.938576
598	911	mmu-miR-7069-5p_R+1	0	0	6.54486	4.15712	0	8.35906	2	1	0	3.17684	0.522912	-1.91237	0.899511	0.573695	-0.935359	0.241319	0.935359
237	408	mmu-miR-377-5p	107.783	119.468	127.625	161.296	258.452	256.091	0	0	2		0.525089	-1.90444	0.0627258	0.0301976	-0.929367	1.52003	0.929367
167	288	mmu-miR-217-5p_1ss19CT	58.4586	35.9374	27.2703	24.1113	25.3544	14.4384	0	0	2		1.90389	1.90389	0.242209	0.124087	0.928949	0.906272	0.928949
43	34	hsa-miR-339-5p_1ss23GT	255.757	260.303	581.947	611.513	774.129	704.82	0	0	2		0.525246	-1.90387	0.319849	0.0484134	-0.928934	1.31503	0.928934
311	529	mmu-miR-488-5p_1ss11AG	51.1513	26.2246	31.6335	21.617	21.265	14.4384	0	0	2		1.90175	1.90175	0.173942	0.0953011	0.927331	1.0209	0.927331
219	376	mmu-miR-344-5p_L-2R-2	0	3.88512	0	0	2.04471	0	2	2	0	0.988306	1.90008	1.90008	0.43381	0.696606	0.926062	0.157013	0.926062
220	378	mmu-miR-344-5p_L-2R-2	0	3.88512	0	0	2.04471	0	2	2	0	0.988306	1.90008	1.90008	0.43381	0.696606	0.926062	0.157013	0.926062
522	823	mmu-miR-5121_L-1R-2	124.225	80.6163	129.806	42.4026	65.4308	68.3923	0	0	2		1.89897	1.89897	0.436329	0.0398343	0.925217	1.39974	0.925217
92	164	mmu-miR-129-5p	414.691	253.504	540.496	1100.39	532.852	660.745	0	0	2		0.526895	-1.89791	0.378624	0.130973	-0.924411	0.88282	0.924411
93	166	mmu-miR-129-5p	414.691	253.504	540.496	1100.39	532.852	660.745	0	0	2		0.526895	-1.89791	0.378624	0.130973	-0.924411	0.88282	0.924411
177	306	mmu-miR-224-3p_L-1R+1	0	6.79897	6.54486	14.9656	5.7252	4.55948	1	0	1		0.528462	-1.89228	0.627296	0.374377	-0.920129	0.426691	0.920129
220	173	pal-miR-9226-5p_L-1_1ss4AG	0	3.88512	3.27243	0	0	3.79957	1	2	0	1.82619	1.88378	1.88378	0.951045	0.556967	0.91363	0.25417	0.91363
221	173	pal-miR-9226-5p_L-1_1ss4AG	0	3.88512	3.27243	0	0	3.79957	1	2	0	1.82619	1.88378	1.88378	0.951045	0.556967	0.91363	0.25417	0.91363
211	364	mmu-miR-340-5p	10866	10443.2	9066.81	6885.03	3978.19	5263.93	0	0	2		1.88353	1.88353	0.588691	0.00900912	0.913442	2.04532	0.913442
217	374	mmu-miR-344b-3p	12.7878	61.1907	7.63567	45.7283	53.1626	54.7138	0	0	2		0.531326	-1.88208	0.0514934	0.237289	-0.91233	0.624722	0.91233
543	851	mmu-miR-6539_R-3	10.961	0	0	9.97709	10.6325	0	2	1	0	5.26177	0.531839	-1.88027	0.939854	0.556469	-0.910938	0.254559	0.910938
102	109	hsa-miR-511-5p	14.6147	9.71281	7.63567	7.48282	5.7252	3.79957	0	0	2		1.87935	1.87935	0.41809	0.0987611	0.910231	1.00541	0.910231
17	19	cli-miR-30e-3p_R+1_1ss22CT	6.69839	28.1672	4.72684	16.2128	30.807	27.3569	0	0	2		0.532322	-1.87856	0.512109	0.253601	-0.909628	0.595849	0.909628
18	19	cli-miR-30e-3p_R+1_1ss22CT	6.69839	28.1672	4.72684	16.2128	30.807	27.3569	0	0	2		0.532322	-1.87856	0.512109	0.253601	-0.909628	0.595849	0.909628
20	21	ola-miR-30e_R+4	6.69839	28.1672	4.72684	16.2128	30.807	27.3569	0	0	2		0.532322	-1.87856	0.512109	0.253601	-0.909628	0.595849	0.909628
4	4	cgr-miR-15b-5p_L+2	12.7878	15.5405	5.45405	8.31424	36.8048	18.2379	0	0	2		0.533206	-1.87545	0.230036	0.328966	-0.907234	0.482849	0.907234
96	172	mmu-miR-132-5p_L-1R+1	102.303	103.927	87.2648	196.216	212.65	139.824	0	0	2		0.5349	-1.86951	0.109373	0.0199399	-0.902659	1.70028	0.902659
593	906	mmu-miR-7059-5p	12.7878	10.6841	21.8162	48.2226	9.81463	26.597	0	0	2		0.535104	-1.8688	0.172417	0.322479	-0.902109	0.491499	0.902109
83	83	PC-3p-55117_12	0	0	7.63567	0	4.08943	0	2	2	0	1.95418	1.86717	1.86717	0.445798	0.703212	0.900856	0.152913	0.900856
484	775	mmu-miR-3082-5p_L-1R+1	2.1922	0	0	0	4.08943	0	2	2	0	1.04694	0.536065	-1.86545	0.44644	0.703566	-0.89952	0.152695	0.89952
67	65	cpo-miR-302c-5p_L-2R+1	10.961	6.79897	11.9989	9.14567	0	6.83923	0	1	1		1.86169	1.86169	0.501599	0.2214	0.896611	0.654823	0.896611
183	313	mmu-miR-297a-3p_L+1R-1	5.93721	2.91384	5.72675	5.1964	5.7252	16.1482	0	0	2		0.538527	-1.85692	0.139028	0.322976	-0.89291	0.49083	0.89291
184	315	mmu-miR-297a-3p_L+1R-1	5.93721	2.91384	5.72675	5.1964	5.7252	16.1482	0	0	2		0.538527	-1.85692	0.139028	0.322976	-0.89291	0.49083	0.89291
185	317	mmu-miR-297a-3p_L+1R-1	5.93721	2.91384	5.72675	5.1964	5.7252	16.1482	0	0	2		0.538527	-1.85692	0.139028	0.322976	-0.89291	0.49083	0.89291
187	321	mmu-miR-297a-3p_L+1R-1	5.93721	2.91384	5.72675	5.1964	5.7252	16.1482	0	0	2		0.538527	-1.85692	0.139028	0.322976	-0.89291	0.49083	0.89291
99	105	hsa-miR-509-3-5p	21.0086	10.1985	9.27189	4.98855	7.36097	9.49893	0	0	2		1.85271	1.85271	0.213579	0.194248	0.88964	0.711643	0.88964
100	107	ggo-miR-509	21.0086	10.1985	9.27189	4.98855	7.36097	9.49893	0	0	2		1.85271	1.85271	0.213579	0.194248	0.88964	0.711643	0.88964
60	49	hsa-miR-558	9.13416	3.39948	5.99946	3.74141	2.8626	3.41961	0	0	2		1.84894	1.84894	0.0468279	0.227227	0.8867	0.643539	0.8867
61	49	hsa-miR-558	9.13416	3.39948	5.99946	3.74141	2.8626	3.41961	0	0	2		1.84894	1.84894	0.0468279	0.227227	0.8867	0.643539	0.8867
125	221	mmu-miR-155-5p	1468.77	811.991	667.576	2101.01	1571.98	1772.12	0	0	2		0.541466	-1.84684	0.562464	0.0458425	-0.885057	1.33873	0.885057
137	137	PC-5p-2088_1248	264.891	163.175	284.701	598.626	344.33	373.118	0	0	2		0.541586	-1.84643	0.35962	0.0861725	-0.884736	1.06463	0.884736
14	12	ssc-miR-30a-3p_L-1R+1	14.6147	14.5692	14.1805	26.6056	24.5366	28.8767	0	0	2		0.541927	-1.84527	0.0238738	0.00969022	-0.883829	2.01367	0.883829
134	137	cja-miR-581	36.5367	21.3682	23.9978	18.2913	15.5398	10.6388	0	0	2		1.84175	1.84175	0.372244	0.073927	0.881079	1.1312	0.881079
351	351	PC-3p-25687_48	0	11.6554	45.814	14.9656	4.08943	12.1586	1	0	1		1.84116	1.84116	0.106479	0.56915	0.880615	0.244773	0.880615
124	219	mmu-miR-154-5p	76.727	122.381	154.895	71.5025	336.151	243.932	0	0	2		0.543295	-1.84062	0.15744	0.286903	-0.880192	0.542265	0.880192
204	208	pal-miR-9993b-3p_1ss1AC	0	17.4831	0	11.6399	10.6325	9.87888	2	0	1		0.543774	-1.839	0.0152085	0.490063	-0.878921	0.309748	0.878921
278	474	mmu-miR-466f-3p_L-1R+2	80.3806	25.2533	153.986	42.4026	7.36097	91.5697	0	0	2		1.83693	1.83693	0.600382	0.426368	0.8773	0.370215	0.8773
97	76	bta-mir-1246-p3_1ss20GA	0	0	3.81784	2.07856	0	0	2	2	0	0.982733	1.83677	1.83677	0.457277	0.709522	0.87717	0.149034	0.87717
239	186	pal-mir-9226-p3_1ss18CA	0	0	3.81784	2.07856	0	0	2	2	0	0.982733	1.83677	1.83677	0.457277	0.709522	0.87717	0.149034	0.87717
187	320	mmu-miR-297b-5p	9.13416	10.6841	9.81729	6.6514	5.7252	3.79957	0	0	2		1.83205	1.83205	0.443688	0.00922698	0.873459	2.03494	0.873459
86	90	cpo-miR-454-3p_R-2	9.13416	0	0	4.98855	0	0	2	2	0	2.35378	1.83103	1.83103	0.459489	0.710737	0.872653	0.148291	0.872653
147	150	hsa-miR-610	23.7488	8.74153	13.0897	12.4714	6.54308	6.07931	0	0	2		1.81639	1.81639	0.351267	0.23667	0.861074	0.625856	0.861074
256	439	mmu-miR-431-5p_R-1	425.652	674.069	457.049	701.722	1141.77	984.089	0	0	2		0.550567	-1.81631	0.53817	0.0481442	-0.861011	1.31746	0.861011
212	366	mmu-miR-341-5p	0	14.5692	5.45405	0	5.7252	5.3194	1	1	0	5.17798	1.81295	1.81295	0.317024	0.553461	0.858337	0.256913	0.858337
233	233	PC-3p-55303_12	0	0	5.45405	4.15712	5.7252	0	2	1	0	2.55606	0.5519	-1.81192	0.93773	0.585861	-0.857522	0.232205	0.857522
80	83	cpo-miR-432-3p_L-1	12.7878	7.77025	8.72648	6.6514	5.7252	3.79957	0	0	2		1.81035	1.81035	0.459404	0.0672503	0.856271	1.17231	0.856271
87	85	pal-miR-9226-5p_L-3_1ss4AG	0	24.282	22.907	39.0769	30.2618	15.9582	1	0	1		0.553233	-1.80756	0.84508	0.287515	-0.854042	0.54134	0.854042
632	950	mmu-mir-8111-p5_1ss13AC	10.961	11.6554	20.7254	4.98855	10.6325	8.35906	0	0	2		1.8074	1.8074	0.427274	0.142963	0.853919	0.844776	0.853919
324	551	mmu-miR-505-3p_R+2	27.4025	15.5405	28.3611	40.7398	53.1626	34.956	0	0	2		0.553352	-1.80717	0.741579	0.0471841	-0.853731	1.3262	0.853731
188	144	hsa-miR-4454_L-2	259.41	191.828	119.989	107.254	139.449	69.9121	0	0	2		1.80417	1.80417	0.398894	0.13229	0.851334	0.878472	0.851334
189	144	hsa-miR-4454_L-2	259.41	191.828	119.989	107.254	139.449	69.9121	0	0	2		1.80417	1.80417	0.398894	0.13229	0.851334	0.878472	0.851334
161	278	mmu-miR-208b-3p	10.961	0	0	0	0	6.07931	2	2	0	2.84005	1.803	1.803	0.470499	0.716772	0.850399	0.144619	0.850399
211	215	ccr-let-7j_R+3_1ss10TA	9.13416	6.79897	0	9.14567	8.17885	11.3987	1	0	1		0.554712	-1.80274	0.21623	0.215611	-0.850189	0.666329	0.850189
159	276	mmu-miR-205-5p	58.4586	14.5692	56.7221	23.2799	22.9008	25.8371	0	0	2		1.80164	1.80164	0.00822511	0.311718	0.84931	0.506238	0.84931
304	518	mmu-miR-471-5p	25.5757	16.5118	13.0897	12.4714	9.81463	8.35906	0	0	2		1.80052	1.80052	0.189146	0.104964	0.848417	0.97896	0.848417
559	868	mmu-miR-6944-3p	21.922	32.0523	81.8108	69.8397	83.4243	91.1897	0	0	2		0.555463	-1.8003	0.204102	0.137242	-0.848237	0.862514	0.848237
475	761	mmu-miR-3062-5p	23.7488	17.4831	18.5438	19.9542	6.54308	6.83923	0	0	2		1.7931	1.7931	0.321762	0.14193	0.842456	0.847925	0.842456
72	132	mmu-miR-99a-3p_R+2	42.0171	54.3917	46.9048	58.1997	109.597	88.91	0	0	2		0.558279	-1.79122	0.109791	0.0696126	-0.840942	1.15731	0.840942
151	151	PC-3p-49134_15	9.13416	0	8.72648	9.97709	0	0	1	2	0	4.63962	1.79017	1.79017	0.890384	0.587787	0.840093	0.23078	0.840093
205	160	hsa-mir-7977-p5_1ss5AG	6.39391	7.28461	6.54486	14.1342	10.6325	11.3987	0	0	2		0.559191	-1.7883	0.125681	0.00839798	-0.838587	2.07583	0.838587
326	553	mmu-miR-511-5p_L+1	118.744	116.554	98.1729	220.327	227.372	148.183	0	0	2		0.559625	-1.78691	0.124614	0.0286389	-0.837469	1.54304	0.837469
88	157	mmu-miR-126a-5p	31.0562	42.7364	14.1805	33.257	86.6959	37.2358	0	0	2		0.559666	-1.78678	0.377344	0.293216	-0.837363	0.532813	0.837363
11	18	mmu-let-7c-1-3p	78.5538	56.3343	34.9059	15.7971	53.1626	26.597	0	0	2		1.77689	1.77689	0.874035	0.214615	0.829358	0.66834	0.829358
89	160	mmu-miR-127-3p	59151	90065.9	58743.4	134206	136270	98385.3	0	0	2		0.563789	-1.77371	0.831391	0.0290114	-0.826772	1.53743	0.826772
34	58	mmu-miR-20b-5p	16.4415	0	5.45405	5.81997	6.54308	0	1	1	0	5.70977	1.77105	1.77105	0.310068	0.578368	0.824602	0.237796	0.824602
158	161	hsa-miR-640	0	7.77025	7.63567	4.15712	0	4.55948	1	1	0	4.02042	1.76742	1.76742	0.487252	0.492177	0.821646	0.307879	0.821646
25	43	mmu-miR-15b-5p	5995.66	3692.81	4531.23	7471.18	11685.1	5974.44	0	0	2		0.565829	-1.76732	0.268289	0.118859	-0.821563	0.924967	0.821563
251	431	mmu-miR-412-5p	12.7878	52.4492	41.4508	70.6711	43.3479	74.4716	0	0	2		0.566011	-1.76675	0.814881	0.150463	-0.821097	0.82257	0.821097
560	869	mmu-miR-6945-3p_R+1	10.961	5.82769	16.3622	14.9656	0	3.79957	0	1	1		1.76661	1.76661	0.628786	0.426608	0.820985	0.369971	0.820985
25	44	mmu-miR-15b-3p_R-1	400.076	221.452	247.614	191.228	179.935	120.826	0	0	2		1.76659	1.76659	0.266332	0.103469	0.820967	0.985189	0.820967
234	403	mmu-miR-376a-5p	9.13416	56.3343	23.9978	29.0999	70.3382	58.5134	0	0	2		0.566417	-1.76548	0.872766	0.286082	-0.820065	0.543509	0.820065
293	500	mmu-miR-466g_1ss21AT	29.2293	0	14.1805	29.9313	4.08943	42.5552	1	0	1		0.566887	-1.76402	0.714416	0.477409	-0.818868	0.321109	0.818868
511	811	mmu-miR-3968_L-3_1ss14AT	792.845	437.077	919.553	1538.14	1379.77	868.582	0	0	2		0.56767	-1.76159	0.676349	0.0929341	-0.816877	1.03182	0.816877
74	136	mmu-miR-100-3p	10.961	19.4256	0	11.6399	22.0829	19.7578	1	0	1		0.56818	-1.76001	0.481277	0.298809	-0.81558	0.524606	0.81558
27	28	bta-miR-105a	12.7878	6.79897	10.9081	0	8.99674	8.35906	0	1	1		1.75704	1.75704	0.542487	0.2666	0.81315	0.574139	0.81315
439	711	mmu-miR-1291_R-4	0	0	15.2713	0	4.90731	3.79957	2	1	0	3.99637	1.75394	1.75394	0.157043	0.701033	0.810599	0.154261	0.810599
203	207	pal-miR-9993a-3p	2214.12	2037.75	1054.81	1396.79	929.118	702.161	0	0	2		1.7525	1.7525	0.486582	0.140901	0.809411	0.851087	0.809411
416	680	mmu-miR-875-3p	29.2293	14.5692	18.5438	14.9656	13.0862	7.59914	0	0	2		1.74869	1.74869	0.406214	0.143804	0.806271	0.842229	0.806271
454	733	mmu-miR-1948-5p_L-1R+2	0	5.82769	5.45405	4.98855	4.08943	10.6388	1	0	1		0.57219	-1.74767	0.915543	0.369599	-0.805434	0.432269	0.805434
288	224	gmo-let-7f-5p_R+3	0	7.77025	5.45405	6.6514	6.54308	9.87888	1	0	1		0.573141	-1.74477	0.368339	0.267375	-0.803037	0.572879	0.803037
69	55	hsa-miR-606	23.7488	15.5405	15.2713	9.97709	11.4504	9.87888	0	0	2		1.7428	1.7428	0.0645972	0.0518595	0.801405	1.28517	0.801405
78	76	hsa-miR-675-5p	10.961	7.77025	6.54486	5.81997	4.90731	3.79957	0	0	2		1.73996	1.73996	0.329097	0.0676154	0.799052	1.16995	0.799052
248	195	cja-miR-9933_L-3	154.367	129.18	303.791	98.1081	112.868	127.286	0	0	2		1.73634	1.73634	0.0466695	0.265622	0.796051	0.575736	0.796051
249	195	cja-miR-9933_L-3	154.367	129.18	303.791	98.1081	112.868	127.286	0	0	2		1.73634	1.73634	0.0466695	0.265622	0.796051	0.575736	0.796051
169	172	cfa-miR-660	10.961	6.79897	9.81729	8.31424	0	7.59914	0	1	1		1.73296	1.73296	0.357656	0.255977	0.793238	0.591799	0.793238
28	22	sha-mir-125b-p5_1ss19GA	16.4415	0	5.45405	11.6399	6.54308	19.7578	1	0	1		0.577098	-1.73281	0.775515	0.435566	-0.793113	0.360946	0.793113
179	308	mmu-miR-293-3p	9.13416	4.85641	9.81729	9.97709	0	3.79957	0	1	1		1.72813	1.72813	0.443708	0.367698	0.789211	0.434509	0.789211
399	658	mmu-miR-719	31.0562	24.282	25.0886	13.3028	19.6293	13.6785	0	0	2		1.72551	1.72551	0.958324	0.0189741	0.787022	1.72184	0.787022
382	637	mmu-miR-695	0	0	6.54486	7.48282	0	3.79957	2	1	0	2.97121	0.580095	-1.72385	0.990129	0.634112	-0.785638	0.197834	0.785638
185	189	hsa-miR-891b	0	0	6.54486	0	0	3.79957	2	2	0	1.72407	1.72253	1.72253	0.504147	0.735141	0.784526	0.133629	0.784526
161	161	PC-3p-57976_11	0	0	6.54486	0	0	3.79957	2	2	0	1.72407	1.72253	1.72253	0.504147	0.735141	0.784526	0.133629	0.784526
335	568	mmu-miR-574-5p	5615.68	6792.17	9480.23	2716.26	2770.18	7233.05	0	0	2		1.72083	1.72083	0.73731	0.180018	0.783104	0.744683	0.783104
414	677	mmu-miR-873a-5p_L+1R-2	14.6147	0	17.453	0	5.7252	12.9185	1	1	0	8.45189	1.72002	1.72002	0.646582	0.533387	0.782426	0.272958	0.782426
114	202	mmu-miR-146b-3p	31.0562	28.1672	40.36	89.7938	37.6227	43.3151	0	0	2		0.583274	-1.71446	0.0944432	0.233826	-0.777755	0.631108	0.777755
87	69	hsa-miR-646	27.4025	13.5979	13.6351	12.0557	11.8593	7.9791	0	0	2		1.71303	1.71303	0.154014	0.188186	0.776551	0.725413	0.776551
88	69	hsa-miR-646	27.4025	13.5979	13.6351	12.0557	11.8593	7.9791	0	0	2		1.71303	1.71303	0.154014	0.188186	0.776551	0.725413	0.776551
506	805	mmu-miR-3474	0	4.85641	0	8.31424	0	0	2	2	0	2.19511	0.584107	-1.71202	0.508777	0.737661	-0.775696	0.132143	0.775696
424	690	mmu-miR-883b-3p	5.4805	4.37077	0	2.49427	3.27154	0	1	1	0	2.60285	1.70856	1.70856	0.516308	0.521845	0.772784	0.282459	0.772784
259	445	mmu-miR-448-3p	25.5757	15.5405	6.54486	9.14567	7.36097	11.3987	0	0	2		1.70795	1.70795	0.0864405	0.306271	0.772268	0.513894	0.772268
342	580	mmu-miR-654-3p	31.0562	16.5118	10.9081	19.9542	9.81463	4.55948	0	0	2		1.70344	1.70344	0.723056	0.344402	0.768447	0.462934	0.768447
24	25	xla-miR-93-5p_R+2	32.883	20.3969	16.3622	47.3912	29.4439	41.7953	0	0	2		0.587051	-1.70343	0.936013	0.0879914	-0.768443	1.05556	0.768443
383	638	mmu-miR-697	52.9781	34.9661	30.5427	30.7627	23.7187	15.1983	0	0	2		1.70045	1.70045	0.601521	0.11842	0.765919	0.926574	0.765919
30	53	mmu-miR-18b-5p	20.0952	13.5979	11.9989	14.9656	8.17885	3.79957	0	0	2		1.69581	1.69581	0.734879	0.200723	0.761974	0.697404	0.761974
184	188	cfa-miR-889_R-1	27.4025	18.4543	15.2713	14.1342	8.99674	12.9185	0	0	2		1.69567	1.69567	0.308263	0.101662	0.761858	0.992841	0.761858
39	68	mmu-miR-23b-5p	652.179	219.51	238.887	205.362	211.014	240.893	0	0	2		1.68968	1.68968	0.0121312	0.396345	0.756752	0.401927	0.756752
5	8	mmu-let-7i-3p	157.108	189.4	347.968	369.984	515.268	288.007	0	0	2		0.59192	-1.68942	0.881341	0.146874	-0.756525	0.833056	0.756525
529	831	mmu-miR-5132-5p_L-1R+2	9.13416	33.0236	53.4497	31.5941	0	25.0772	0	1	1		1.68705	1.68705	0.722531	0.463375	0.754504	0.334068	0.754504
37	36	hsa-miR-147a_R+2	27.4025	15.5405	8.72648	14.9656	6.54308	9.11897	0	0	2		1.68702	1.68702	0.345098	0.30722	0.754475	0.512551	0.754475
586	898	mmu-miR-7036a-5p	0	5.82769	0	0	9.81463	0	2	2	0	2.60705	0.593776	-1.68414	0.521333	0.744485	-0.75201	0.128144	0.75201
340	576	mmu-miR-652-5p	31.0562	6.79897	39.2692	4.98855	8.99674	31.9164	0	0	2		1.68021	1.68021	0.850943	0.463724	0.748638	0.33374	0.748638
332	564	mmu-miR-543-5p_L+1	14.6147	44.6789	33.8151	27.437	50.7089	78.2712	0	0	2		0.595259	-1.67994	0.527128	0.285213	-0.74841	0.54483	0.74841
248	426	mmu-miR-409-3p	1435.89	1707.51	1100.63	2476.81	2312.16	2333.7	0	0	2		0.595848	-1.67828	0.159511	0.00632064	-0.746984	2.19924	0.746984
296	505	mmu-miR-467d-3p	20.5519	9.46999	43.6324	34.2963	25.9679	63.2629	0	0	2		0.596261	-1.67712	0.884338	0.333638	-0.745985	0.476724	0.745985
298	509	mmu-miR-467d-3p	20.5519	9.46999	43.6324	34.2963	25.9679	63.2629	0	0	2		0.596261	-1.67712	0.884338	0.333638	-0.745985	0.476724	0.745985
300	513	mmu-miR-467d-3p	20.5519	9.46999	43.6324	34.2963	25.9679	63.2629	0	0	2		0.596261	-1.67712	0.884338	0.333638	-0.745985	0.476724	0.745985
301	515	mmu-miR-467d-3p	20.5519	9.46999	43.6324	34.2963	25.9679	63.2629	0	0	2		0.596261	-1.67712	0.884338	0.333638	-0.745985	0.476724	0.745985
190	145	hsa-miR-4454_L-3R+1	18.2683	27.1959	31.6335	42.4026	57.252	29.6367	0	0	2		0.59631	-1.67698	0.390452	0.122118	-0.745865	0.91322	0.745865
483	773	mmu-miR-3076-5p_R-1	0	0	5.45405	9.14567	0	0	2	2	0	2.43329	0.596353	-1.67686	0.524679	0.746301	-0.74576	0.127086	0.74576
165	165	PC-3p-46980_16	0	0	5.45405	9.14567	0	0	2	2	0	2.43329	0.596353	-1.67686	0.524679	0.746301	-0.74576	0.127086	0.74576
77	139	mmu-miR-101c_L+2R+1	18.8773	15.2167	15.2713	5.26569	9.542	14.6917	0	0	2		1.67344	1.67344	0.32994	0.0905451	0.742815	1.04313	0.742815
143	146	hsa-miR-600	12.7878	4.85641	6.54486	5.81997	4.08943	4.55948	0	0	2		1.6718	1.6718	0.0877245	0.259308	0.741403	0.586184	0.741403
602	916	mmu-miR-7081-3p	0	0	7.63567	6.6514	0	6.07931	2	1	0	3.3944	0.599784	-1.66727	0.822945	0.635688	-0.737486	0.196756	0.737486
138	107	cgr-miR-1285_L+1R-6	0	9.71281	22.907	15.7971	0	3.79957	1	1	0	8.70274	1.66456	1.66456	0.679261	0.623262	0.735143	0.205329	0.735143
302	516	mmu-miR-468-3p	20.0952	23.3107	18.5438	15.7971	13.0862	8.35906	0	0	2		1.66342	1.66342	0.58878	0.0334319	0.734155	1.47584	0.734155
112	118	hsa-miR-541-5p	11.8744	8.74153	4.90865	5.81997	5.7252	3.79957	0	0	2		1.66341	1.66341	0.192981	0.184562	0.734143	0.733858	0.734143
113	119	dno-miR-541-5p	11.8744	8.74153	4.90865	5.81997	5.7252	3.79957	0	0	2		1.66341	1.66341	0.192981	0.184562	0.734143	0.733858	0.734143
175	302	mmu-miR-222-3p_R+2	13765.2	8840.6	11391.3	18136.7	22135.3	16266.7	0	0	2		0.601307	-1.66304	0.805885	0.0284529	-0.733826	1.54587	0.733826
204	351	mmu-miR-329-3p	414.691	553.63	508.318	389.938	1149.13	913.417	0	0	2		0.602099	-1.66086	0.0643602	0.226909	-0.731927	0.644148	0.731927
208	212	chi-let-7a-5p_R+2	29.2293	39.8225	40.36	59.8626	66.2487	55.4737	0	0	2		0.602538	-1.65965	0.853952	0.00735812	-0.730876	2.13323	0.730876
430	699	mmu-miR-1193-3p	275.852	234.079	173.439	315.941	525.082	292.567	0	0	2		0.602836	-1.65883	0.278497	0.132725	-0.730163	0.877047	0.730163
246	193	cja-miR-9933_L-4_1ss12AT	36.5367	30.5954	64.3578	27.8527	25.3544	26.217	0	0	2		1.65554	1.65554	0.00986365	0.236871	0.7273	0.625488	0.7273
454	734	mmu-miR-1948-3p	32.883	16.5118	0	24.9427	4.90731	0	1	1	0	13.2075	1.65476	1.65476	0.784871	0.621031	0.726625	0.206887	0.726625
162	165	hsa-miR-649	0	5.82769	5.45405	0	0	6.83923	1	2	0	3.02016	1.64956	1.64956	0.811295	0.64283	0.722084	0.191904	0.722084
486	779	mmu-miR-3091-3p	10.961	0	0	6.6514	0	0	2	2	0	2.9354	1.64792	1.64792	0.538263	0.753666	0.72065	0.122821	0.72065
94	99	hsa-miR-500a-3p	22.8354	11.1697	13.6351	10.8085	9.81463	8.35906	0	0	2		1.64378	1.64378	0.0771996	0.160942	0.717014	0.793329	0.717014
95	100	cja-miR-502b_R-1	22.8354	11.1697	13.6351	10.8085	9.81463	8.35906	0	0	2		1.64378	1.64378	0.0771996	0.160942	0.717014	0.793329	0.717014
505	803	mmu-miR-3473d_L-1R+1	0	0	23.9978	10.8085	0	3.79957	2	1	0	6.43432	1.64278	1.64278	0.270814	0.734407	0.716136	0.134063	0.716136
114	114	PC-3p-22436_59	10.961	12.6267	13.0897	4.98855	8.99674	8.35906	0	0	2		1.64146	1.64146	0.425443	0.0270497	0.714981	1.56784	0.714981
52	94	mmu-miR-29b-3p	1674.29	1345.22	1081.54	785.28	810.933	905.058	0	0	2		1.63959	1.63959	0.086302	0.0383166	0.713333	1.41661	0.713333
53	96	mmu-miR-29b-3p	1674.29	1345.22	1081.54	785.28	810.933	905.058	0	0	2		1.63959	1.63959	0.086302	0.0383166	0.713333	1.41661	0.713333
91	72	hsa-miR-875-3p	12.7878	0	5.45405	5.81997	0	5.3194	1	1	0	4.89687	1.6376	1.6376	0.40338	0.598569	0.711587	0.222886	0.711587
178	307	mmu-miR-290a-5p	0	6.79897	0	4.15712	0	0	2	2	0	1.82601	1.6355	1.6355	0.544239	0.756902	0.709731	0.120961	0.709731
407	668	mmu-miR-762	0	6.79897	0	4.15712	0	0	2	2	0	1.82601	1.6355	1.6355	0.544239	0.756902	0.709731	0.120961	0.709731
74	72	rno-miR-450a-5p	21.922	18.4543	13.0897	10.8085	8.99674	12.9185	0	0	2		1.63386	1.63386	0.325732	0.069521	0.708283	1.15788	0.708283
446	723	mmu-miR-1933-3p	12.7878	4.85641	0	10.8085	0	0	1	2	0	4.74213	1.63244	1.63244	0.966149	0.682956	0.707028	0.165608	0.707028
161	164	hsa-miR-647	16.4415	11.6554	9.81729	9.97709	4.90731	8.35906	0	0	2		1.63118	1.63118	0.728894	0.119538	0.705912	0.922495	0.705912
70	68	hsa-miR-371a-5p	0	10.6841	5.45405	5.81997	4.08943	0	1	1	0	4.34126	1.62857	1.62857	0.476697	0.588456	0.703605	0.230286	0.703605
174	300	mmu-miR-221-3p_R-1	46566	30852.7	35907.3	66411.7	66071.2	52042.7	0	0	2		0.614148	-1.62827	0.978058	0.0230911	-0.703343	1.63655	0.703343
85	152	mmu-miR-125a-5p	41690.1	43720.3	52332.7	73191.1	75637.2	75218.6	0	0	2		0.614796	-1.62656	0.101762	0.00100855	-0.701821	2.9963	0.701821
81	84	dno-miR-433-3p_L+2	0	5.82769	6.54486	6.6514	7.36097	6.07931	1	0	1		0.615805	-1.62389	0.0620021	0.288745	-0.699455	0.539486	0.699455
507	806	mmu-miR-3535	352.579	264.188	1906.74	173.768	300.982	1080.6	0	0	2		1.62247	1.62247	0.440449	0.621468	0.698191	0.206581	0.698191
110	195	mmu-miR-143-5p	4729.67	2919.67	3966.19	7215.93	7107.42	4509.33	0	0	2		0.616775	-1.62134	0.520351	0.0794663	-0.697184	1.09982	0.697184
188	192	hsa-miR-892a	25.5757	7.77025	9.81729	11.6399	8.17885	6.83923	0	0	2		1.61914	1.61914	0.121446	0.396851	0.695232	0.401372	0.695232
255	199	pal-miR-9993a-3p_L+2_1ss13GA	0	4.85641	0	4.98855	2.8626	0	2	1	0	2.11793	0.61856	-1.61666	0.887109	0.669411	-0.693014	0.174307	0.693014
263	204	pal-miR-9995-3p_L+2	0	4.85641	0	4.98855	2.8626	0	2	1	0	2.11793	0.61856	-1.61666	0.887109	0.669411	-0.693014	0.174307	0.693014
92	165	mmu-miR-129-2-3p	243.882	196.684	203.436	280.19	458.016	301.686	0	0	2		0.619298	-1.61473	0.129371	0.0850228	-0.691295	1.07046	0.691295
93	167	mmu-miR-129-1-3p_1ss20TC	243.882	196.684	203.436	280.19	458.016	301.686	0	0	2		0.619298	-1.61473	0.129371	0.0850228	-0.691295	1.07046	0.691295
607	921	mmu-miR-7115-5p	12.7878	37.88	110.172	31.5941	16.3577	51.6742	0	0	2		1.61443	1.61443	0.218628	0.545517	0.691029	0.263192	0.691029
233	402	mmu-miR-375-3p	25.5757	6.79897	5.45405	30.7627	19.6293	10.6388	0	0	2		0.61983	-1.61335	0.890798	0.425274	-0.690056	0.371331	0.690056
528	830	mmu-miR-5129-5p	0	25.2533	26.1794	9.97709	8.99674	12.9185	1	0	1		1.6127	1.6127	0.0370567	0.527817	0.689476	0.277516	0.689476
145	255	mmu-miR-194-5p	429.306	498.753	380.693	826.02	711.969	568.036	0	0	2		0.621432	-1.60919	0.347998	0.031795	-0.686332	1.49764	0.686332
57	46	hsa-miR-483-3p_L-1R+2	18.2683	2.4282	6.54486	5.81997	7.36097	3.79957	0	0	2		1.60427	1.60427	0.0901914	0.520056	0.68192	0.28395	0.68192
157	160	hsa-miR-639	20.0952	10.6841	11.9989	9.97709	11.4504	5.3194	0	0	2		1.59937	1.59937	0.565613	0.198874	0.677503	0.701422	0.677503
47	84	mmu-miR-27a-5p	1026.68	780.91	884.647	636.871	538.169	508.383	0	0	2		1.59926	1.59926	0.458129	0.0143198	0.677408	1.84406	0.677408
273	466	mmu-miR-466f-3p_L-1R+1	115.09	84.9871	303.427	64.0197	66.2487	184.659	0	0	2		1.5988	1.5988	0.507308	0.47138	0.676985	0.326629	0.676985
274	468	mmu-miR-466i-3p_R-1	115.09	84.9871	303.427	64.0197	66.2487	184.659	0	0	2		1.5988	1.5988	0.507308	0.47138	0.676985	0.326629	0.676985
437	707	mmu-miR-1247-5p	8003.35	16989.6	8641.4	6056.93	6855.52	8135.64	0	0	2		1.59798	1.59798	0.0838038	0.229026	0.676249	0.640115	0.676249
141	144	mml-miR-590-3p_1ss14AG	12.7878	8.74153	13.0897	7.48282	7.36097	6.83923	0	0	2		1.5966	1.5966	0.0388822	0.0886412	0.675002	1.05236	0.675002
402	662	mmu-miR-743b-3p	34.7098	14.5692	26.1794	14.9656	19.6293	12.9185	0	0	2		1.58815	1.58815	0.20747	0.20534	0.667348	0.687526	0.667348
61	59	pma-miR-221_R+3_1ss22CT	135.186	97.1281	114.535	226.979	150.491	173.26	0	0	2		0.629798	-1.58781	0.380993	0.0542823	-0.667039	1.26534	0.667039
390	649	mmu-miR-708-3p	294.12	507.009	529.043	283.516	296.892	258.371	0	0	2		1.58584	1.58584	0.0444399	0.157551	0.66525	0.802578	0.66525
138	141	hsa-miR-585-3p	31.0562	19.4256	17.453	15.7971	17.1756	9.87888	0	0	2		1.58535	1.58535	0.435197	0.15636	0.664802	0.805876	0.664802
10	16	cpo-let-7f-2-3p_1ss22CT	168.678	127.885	187.619	92.011	114.231	99.5488	0	0	2		1.58338	1.58338	0.241035	0.0340477	0.663004	1.46791	0.663004
31	54	mmu-miR-19b-3p	563.578	355.489	698.664	153.814	311.614	557.397	0	0	2		1.58163	1.58163	0.8389	0.267604	0.661412	0.572508	0.661412
32	56	mmu-miR-19b-3p	563.578	355.489	698.664	153.814	311.614	557.397	0	0	2		1.58163	1.58163	0.8389	0.267604	0.661412	0.572508	0.661412
430	698	mmu-miR-1193-5p_L+1	20.0952	36.9087	19.6346	58.1997	39.2585	23.5573	0	0	2		0.633294	-1.57905	0.487119	0.268272	-0.659053	0.571425	0.659053
56	54	ssc-miR-206	0	13.5979	6.54486	8.31424	8.99674	14.4384	1	0	1		0.634432	-1.57621	0.391704	0.426811	-0.656463	0.369764	0.656463
154	270	mmu-miR-200b-5p	0	0	6.54486	4.15712	0	0	2	2	0	1.78366	1.57437	1.57437	0.574936	0.773486	0.654778	0.111548	0.654778
17	16	dre-miR-30a-5p_R+2_2ss10TC13CT	10.0476	13.5979	6.54486	18.707	14.7219	14.0584	0	0	2		0.635756	-1.57293	0.674026	0.0824167	-0.653456	1.08399	0.653456
213	169	efu-miR-9226_1ss22GA	16.4415	30.5954	106.899	96.4452	82.1975	63.4528	0	0	2		0.635849	-1.5727	0.207325	0.378059	-0.653244	0.422441	0.653244
227	177	pal-miR-9226-5p	16.4415	30.5954	106.899	96.4452	82.1975	63.4528	0	0	2		0.635849	-1.5727	0.207325	0.378059	-0.653244	0.422441	0.653244
178	182	ptr-miR-877_R+4	0	0	10.9081	4.98855	0	12.1586	2	1	0	4.67588	0.636146	-1.57197	0.970038	0.702506	-0.652571	0.15335	0.652571
234	404	mmu-miR-376a-3p	40.1903	62.162	13.0897	19.1228	17.9935	36.4759	0	0	2		1.56867	1.56867	0.301692	0.41627	0.649545	0.380625	0.649545
76	60	hsa-miR-632	0	5.34205	0	2.49427	2.45366	3.41961	2	0	1		0.638425	-1.56636	0.0608494	0.606802	-0.647412	0.216953	0.647412
77	60	hsa-miR-632	0	5.34205	0	2.49427	2.45366	3.41961	2	0	1		0.638425	-1.56636	0.0608494	0.606802	-0.647412	0.216953	0.647412
20	20	PC-3p-18847_74	10.961	10.6841	8.72648	26.6056	5.7252	15.1983	0	0	2		0.63901	-1.56492	0.0267826	0.443735	-0.646088	0.352876	0.646088
198	341	mmu-miR-323-3p	94.9953	98.0994	65.4486	162.959	139.041	101.828	0	0	2		0.640231	-1.56194	0.509967	0.0784924	-0.643336	1.10517	0.643336
270	210	bta-miR-11980_R-2_1ss4CG	21.922	24.7677	9.81729	20.3699	13.9041	53.9539	0	0	2		0.640466	-1.56136	0.239947	0.469013	-0.642806	0.328815	0.642806
180	184	rno-miR-881-3p_L-1R+1	31.0562	18.4543	10.9081	15.7971	13.0862	9.87888	0	0	2		1.5587	1.5587	0.15618	0.303599	0.640345	0.5177	0.640345
52	55	xtr-miR-221_R+2	336.137	287.499	305.427	443.981	472.738	531.18	0	0	2		0.641663	-1.55845	0.469125	0.00413381	-0.640112	2.38365	0.640112
317	540	mmu-miR-496a-3p_L-2R+1	151.627	227.28	135.26	167.948	388.496	244.692	0	0	2		0.641798	-1.55812	0.322491	0.246808	-0.639809	0.60764	0.639809
270	460	mmu-miR-465d-5p_R-1	16.4415	8.74153	8.72648	9.14567	6.54308	6.07931	0	0	2		1.55776	1.55776	0.242468	0.213806	0.639477	0.66998	0.639477
556	865	mmu-miR-6933-5p	18.2683	4.85641	41.4508	67.3454	17.1756	15.9582	0	0	2		0.642676	-1.55599	0.570004	0.582204	-0.637837	0.234925	0.637837
558	867	mmu-miR-6940-3p_R-1	0	0	7.63567	0	4.90731	0	2	2	0	2.0905	1.55598	1.55598	0.584613	0.778702	0.637822	0.108629	0.637822
142	145	hsa-miR-591	21.922	28.1672	26.1794	21.617	12.2683	15.1983	0	0	2		1.55385	1.55385	0.616139	0.0524225	0.635848	1.28048	0.635848
322	548	mmu-miR-503-3p_L+1	195.471	388.512	143.987	374.972	459.652	294.847	0	0	2		0.644524	-1.55153	0.580257	0.204336	-0.633695	0.689655	0.633695
56	59	hsa-miR-300	21.922	15.5405	20.7254	14.9656	8.17885	14.4384	0	0	2		1.54826	1.54826	0.893364	0.0790393	0.630644	1.10216	0.630644
133	136	hsa-miR-580-3p	23.7488	15.5405	21.8162	13.3028	15.5398	10.6388	0	0	2		1.5477	1.5477	0.492728	0.0649697	0.630129	1.18729	0.630129
62	65	bta-miR-339a_R+1_1ss22CA	129.705	113.154	260.158	205.778	303.844	267.87	0	0	2		0.646975	-1.54566	0.550291	0.169137	-0.628218	0.77176	0.628218
64	67	ssc-miR-339-5p_R+1_1ss22CA	129.705	113.154	260.158	205.778	303.844	267.87	0	0	2		0.646975	-1.54566	0.550291	0.169137	-0.628218	0.77176	0.628218
17	13	oni-miR-27c	0	4.85641	10.9081	14.1342	4.90731	5.3194	1	0	1		0.647123	-1.5453	0.952695	0.54695	-0.627889	0.262052	0.627889
1	1	gga-miR-7_R+3	29.2293	16.9974	33.8151	46.5598	30.2618	46.3548	0	0	2		0.649815	-1.5389	0.927241	0.122891	-0.621898	0.910481	0.621898
2	1	gga-miR-7_R+3	29.2293	16.9974	33.8151	46.5598	30.2618	46.3548	0	0	2		0.649815	-1.5389	0.927241	0.122891	-0.621898	0.910481	0.621898
381	636	mmu-miR-694	47.4976	21.3682	21.8162	29.0999	14.7219	15.1983	0	0	2		1.53646	1.53646	0.459296	0.343847	0.619611	0.463635	0.619611
158	122	efu-miR-2683_L+1R-4_1ss11GA	27.4025	38.3656	33.8151	26.6056	19.2203	18.9979	0	0	2		1.53622	1.53622	0.763829	0.0457197	0.61938	1.3399	0.61938
159	122	efu-miR-2683_L+1R-4_1ss11GA	27.4025	38.3656	33.8151	26.6056	19.2203	18.9979	0	0	2		1.53622	1.53622	0.763829	0.0457197	0.61938	1.3399	0.61938
4	6	mmu-let-7d-3p	61584.4	73707.6	99299.7	52635.8	44376	55767.8	0	0	2		1.53549	1.53549	0.170881	0.0788566	0.6187	1.10316	0.6187
294	501	mmu-mir-467f-p5_1ss12GT	0	2.91384	0	0	0	1.89979	2	2	0	0.802271	1.53378	1.53378	0.596576	0.785143	0.617087	0.105051	0.617087
88	86	pal-miR-9993a-3p_L+1_2	0	5.82769	0	0	0	3.79957	2	2	0	1.60454	1.53378	1.53378	0.596576	0.785143	0.617087	0.105051	0.617087
256	200	pal-miR-9993a-3p_L+1_1	0	5.82769	0	0	0	3.79957	2	2	0	1.60454	1.53378	1.53378	0.596576	0.785143	0.617087	0.105051	0.617087
257	200	pal-miR-9993a-3p_L+1_1	0	5.82769	0	0	0	3.79957	2	2	0	1.60454	1.53378	1.53378	0.596576	0.785143	0.617087	0.105051	0.617087
226	390	mmu-miR-362-3p_R-1	436.613	514.779	525.771	273.539	295.257	394.395	0	0	2		1.53361	1.53361	0.725563	0.0212681	0.616935	1.67227	0.616935
17	28	mmu-miR-7a-1-3p	164.415	101.985	119.989	73.1653	79.3349	99.5488	0	0	2		1.53299	1.53299	0.311455	0.0908321	0.616348	1.04176	0.616348
189	193	bta-miR-1246_R+2	0	4.85641	40.36	24.9427	0	4.55948	1	1	0	12.4531	1.53264	1.53264	0.533011	0.742154	0.616022	0.129506	0.616022
637	957	mmu-miR-12191-3p_L+4R-2	0	0	5.45405	0	0	8.35906	2	2	0	2.30218	0.652472	-1.53263	0.5972	0.785479	-0.616012	0.104866	0.616012
35	61	mmu-miR-20a-3p_R+1	16.4415	28.1672	18.5438	9.97709	22.9008	8.35906	0	0	2		1.53145	1.53145	0.761896	0.279725	0.614901	0.553269	0.614901
6	4	oni-miR-21_R-2	0	12.6267	6.54486	10.8085	14.7219	3.79957	1	0	1		0.653648	-1.52988	0.868751	0.523333	-0.613414	0.281222	0.613414
152	268	mmu-miR-200a-3p	87.688	64.1046	63.267	77.3225	35.987	27.3569	0	0	2		1.52886	1.52886	0.424546	0.226651	0.612459	0.644642	0.612459
70	56	hsa-miR-613	12.7878	7.77025	16.3622	12.4714	4.08943	7.59914	0	0	2		1.52816	1.52816	0.974968	0.288803	0.611795	0.539398	0.611795
203	349	mmu-miR-328-3p	14603.7	18551.5	27022.1	12688.4	10823.5	15881.4	0	0	2		1.5276	1.5276	0.279595	0.154288	0.611268	0.811668	0.611268
201	345	chi-miR-326-5p_1ss5GA	0	5.82769	15.2713	10.8085	12.2683	9.11897	1	0	1		0.655335	-1.52594	0.0802864	0.46109	-0.609694	0.336214	0.609694
98	103	hsa-miR-508-5p	13.7012	6.79897	7.09027	7.06711	5.31626	5.69936	0	0	2		1.52579	1.52579	0.105331	0.242934	0.609559	0.614512	0.609559
314	534	mmu-miR-493-3p	98.649	68.961	52.3589	103.097	116.14	116.267	0	0	2		0.655638	-1.52523	0.188613	0.0537084	-0.609028	1.26996	0.609028
137	242	mmu-miR-187-3p_R+1	20.0952	32.0523	37.0875	37.4141	51.5268	47.1147	0	0	2		0.655872	-1.52469	0.812508	0.075454	-0.608515	1.12232	0.608515
354	354	PC-3p-48599_15	0	0	5.45405	8.31424	0	0	2	2	0	2.29472	0.655989	-1.52442	0.601713	0.787906	-0.608257	0.103525	0.608257
4	5	ssc-mir-1285-p3_1ss24TA	4011.72	2975.03	2980.09	2309.7	2042.26	2187.03	0	0	2		1.52422	1.52422	0.0957277	0.0318453	0.60807	1.49695	0.60807
138	243	mmu-miR-188-5p	42.0171	26.2246	58.9038	54.0426	78.517	60.0332	0	0	2		0.660178	-1.51474	0.75729	0.142455	-0.599074	0.846323	0.599074
204	350	mmu-miR-329-5p_R+1	1055.91	1488	1411.51	1869.04	1888.5	2226.55	0	0	2		0.66099	-1.51288	0.863682	0.0186375	-0.5973	1.72961	0.5973
478	766	mmu-miR-3068-3p	465.842	325.379	305.427	270.213	230.644	224.175	0	0	2		1.51255	1.51255	0.150322	0.0776586	0.596986	1.10981	0.596986
5	5	ccr-miR-16b_1ss22GA	65.766	77.7025	21.8162	74.8282	121.865	53.194	0	0	2		0.661437	-1.51186	0.825398	0.346426	-0.596324	0.46039	0.596324
330	560	mmu-miR-541-5p	10111.5	14132.1	7827.65	15611.7	17248.4	15390.5	0	0	2		0.664682	-1.50448	0.183617	0.0493643	-0.589263	1.30659	0.589263
120	213	mmu-miR-150-5p	25.5757	14.5692	33.8151	13.3028	23.7187	12.1586	0	0	2		1.50386	1.50386	0.606411	0.28382	0.58867	0.546956	0.58867
98	104	hsa-miR-508-3p	16.4415	11.6554	10.9081	14.9656	4.90731	6.07931	0	0	2		1.50295	1.50295	0.459127	0.295437	0.587797	0.529535	0.587797
50	89	mmu-miR-29a-5p_R+3	10.961	12.6267	45.814	12.4714	40.8943	50.9142	0	0	2		0.665533	-1.50256	0.985716	0.511851	-0.587418	0.290857	0.587418
524	826	mmu-miR-5123_L+1R-3	9.13416	0	0	0	0	6.07931	2	2	0	2.53558	1.5025	1.5025	0.613967	0.794494	0.587364	0.0999096	0.587364
209	360	mmu-miR-338-5p_R-1	275.852	286.528	329.425	547.909	449.837	341.961	0	0	2		0.665671	-1.50224	0.140865	0.0727376	-0.587118	1.13824	0.587118
264	451	mmu-miR-450b-5p_R+1	49.3245	51.4779	62.1762	41.5712	33.5333	33.4362	0	0	2		1.50154	1.50154	0.630261	0.0194545	0.586445	1.71098	0.586445
164	167	cja-miR-651	14.6147	7.77025	9.81729	4.98855	7.36097	9.11897	0	0	2		1.49998	1.49998	0.516463	0.20332	0.584939	0.69182	0.584939
245	421	mmu-miR-382-5p	2022.3	3986.14	1892.56	4281.84	3887.41	3681.78	0	0	2		0.666693	-1.49994	0.126591	0.133042	-0.584906	0.876012	0.584906
471	756	mmu-miR-3057-3p	12.7878	23.3107	44.7232	22.4485	4.08943	27.3569	0	0	2		1.49962	1.49962	0.724447	0.488038	0.584598	0.311546	0.584598
175	132	hsa-miR-4286_L+1R+2	0	0	2.72703	0	4.08943	0	2	2	0	1.13608	0.666848	-1.49959	0.615616	0.795379	-0.584571	0.0994257	0.584571
114	89	hsa-mir-1260b-p3_1ss8AG	22.8354	18.94	23.9978	16.2128	15.1309	12.5386	0	0	2		1.49886	1.49886	0.673733	0.0177643	0.583863	1.75045	0.583863
123	96	hsa-mir-1260b-p5_1ss8AG	22.8354	18.94	23.9978	16.2128	15.1309	12.5386	0	0	2		1.49886	1.49886	0.673733	0.0177643	0.583863	1.75045	0.583863
1	1	mmu-miR-1a-3p	112.35	105.87	136.351	73.9968	95.6926	66.8724	0	0	2		1.49885	1.49885	0.932702	0.0362394	0.583858	1.44082	0.583858
2	2	mmu-miR-1a-3p	112.35	105.87	136.351	73.9968	95.6926	66.8724	0	0	2		1.49885	1.49885	0.932702	0.0362394	0.583858	1.44082	0.583858
3	4	mmu-let-7f-1-3p_1ss22CT	54.805	31.081	38.1784	14.9656	35.1691	32.6763	0	0	2		1.49816	1.49816	0.900115	0.220527	0.583194	0.656538	0.583194
208	358	mmu-miR-337-5p	2986.87	5248.8	3252.8	5519	6503.01	5185.65	0	0	2		0.667637	-1.49782	0.469687	0.0797074	-0.582864	1.0985	0.582864
186	142	hsa-mir-4454-p3_1ss19AT	7.30733	13.1123	5.45405	2.90999	9.81463	4.55948	0	0	2		1.49696	1.49696	0.897754	0.408962	0.58204	0.388317	0.58204
33	34	dno-miR-134-5p_R+1_1ss22CA	51.1513	140.836	135.26	160.465	170.938	157.302	0	0	2		0.669622	-1.49338	0.039552	0.202727	-0.578582	0.693089	0.578582
426	693	mmu-miR-1187_R-2	2.1922	4.37077	1.36351	4.98855	0	6.83923	0	1	1		0.670158	-1.49219	0.323272	0.591185	-0.577427	0.228276	0.577427
140	143	hsa-miR-588	27.4025	19.4256	17.453	15.7971	10.6325	16.7181	0	0	2		1.48979	1.48979	0.558752	0.120704	0.575111	0.91828	0.575111
394	653	mmu-miR-713	29.2293	18.4543	14.1805	14.9656	10.6325	15.9582	0	0	2		1.48868	1.48868	0.235351	0.228584	0.574036	0.640955	0.574036
87	156	mmu-miR-126b-3p_R-1	0	5.82769	0	0	4.08943	4.55948	2	1	0	2.41277	0.673806	-1.48411	0.714259	0.717675	-0.569595	0.144072	0.569595
409	670	mmu-miR-770-5p_R+1	40.1903	64.1046	39.2692	56.5369	70.3382	85.8703	0	0	2		0.674816	-1.48188	0.958642	0.121007	-0.567433	0.91719	0.567433
308	524	mmu-miR-486b-5p	408.297	604.622	788.11	473.08	381.135	362.479	0	0	2		1.48027	1.48027	0.177131	0.165191	0.565856	0.782014	0.565856
309	526	mmu-miR-486b-5p	408.297	604.622	788.11	473.08	381.135	362.479	0	0	2		1.48027	1.48027	0.177131	0.165191	0.565856	0.782014	0.565856
60	110	mmu-miR-31-3p	144.32	65.0758	106.899	41.5712	85.878	86.6302	0	0	2		1.47747	1.47747	0.59509	0.280201	0.563125	0.552531	0.563125
196	151	oni-mir-7550-p5_1ss1AT	843.083	1370.96	2705.21	3902.29	1899.54	1464.73	0	0	2		0.676971	-1.47717	0.70543	0.448863	-0.562833	0.347886	0.562833
201	157	oni-miR-7550_1ss1AT	843.083	1370.96	2705.21	3902.29	1899.54	1464.73	0	0	2		0.676971	-1.47717	0.70543	0.448863	-0.562833	0.347886	0.562833
223	383	mmu-miR-350-5p_R+2	526.128	421.536	476.684	885.467	721.375	495.464	0	0	2		0.677517	-1.47598	0.133275	0.125648	-0.561671	0.900846	0.561671
544	852	mmu-miR-6540-5p_R+1	0	24.282	0	14.9656	15.5398	5.3194	2	0	1		0.677798	-1.47537	0.28733	0.682737	-0.561072	0.165747	0.561072
75	78	bta-miR-378b_R+3_1ss4TG	0	8.74153	0	4.15712	0	8.73901	2	1	0	3.60628	0.677841	-1.47527	0.857246	0.737566	-0.560981	0.132199	0.560981
519	820	mmu-miR-5113_L+1	0	13.5979	13.0897	16.6285	9.81463	12.9185	1	0	1		0.678012	-1.4749	0.327571	0.434333	-0.560618	0.362177	0.560618
473	759	mmu-miR-3060-3p_L-2R+2	0	6.79897	5.45405	6.6514	0	11.3987	1	1	0	5.05052	0.678834	-1.47312	0.566734	0.646663	-0.55887	0.189322	0.55887
150	153	cja-miR-622	0	5.82769	8.72648	4.15712	5.7252	0	1	1	0	4.07275	1.47275	1.47275	0.614125	0.639985	0.558511	0.19383	0.558511
477	763	mmu-miR-3066-5p_R+1	0	13.5979	9.81729	10.8085	12.2683	11.3987	1	0	1		0.679184	-1.47235	0.0216551	0.459282	-0.558125	0.337921	0.558125
406	667	mmu-miR-761	23.7488	13.5979	11.9989	7.48282	14.7219	11.3987	0	0	2		1.46847	1.46847	0.488666	0.28281	0.554313	0.548506	0.554313
422	688	mmu-miR-881-3p	43.844	36.9087	29.4519	26.6056	31.0796	17.478	0	0	2		1.4662	1.4662	0.962446	0.112916	0.552084	0.947245	0.552084
325	552	mmu-miR-509-3p	20.0952	16.5118	9.81729	14.1342	11.4504	6.07931	0	0	2		1.46616	1.46616	0.763994	0.268414	0.552038	0.571194	0.552038
18	30	mmu-let-7a-1-3p_1ss22CT	322.131	289.118	306.518	146.054	205.835	274.329	0	0	2		1.46557	1.46557	0.124177	0.0639998	0.551465	1.19382	0.551465
127	225	mmu-miR-181a-2-3p	96.8221	54.3917	83.9924	123.882	117.776	102.968	0	0	2		0.682497	-1.46521	0.3926	0.0598823	-0.551106	1.2227	0.551106
37	65	mmu-miR-22-3p	92910.9	113341	89772.6	120202	209269	103148	0	0	2		0.684259	-1.46143	0.0960217	0.248277	-0.547385	0.605063	0.547385
176	303	mmu-miR-223-5p_R+1	1598.48	1301.52	714.481	1129.91	648.583	696.841	0	0	2		1.4602	1.4602	0.515401	0.276302	0.546165	0.558616	0.546165
66	53	hsa-miR-575	8.22075	4.85641	4.36324	3.74141	3.27154	4.93944	0	0	2		1.45915	1.45915	0.287429	0.235029	0.545133	0.628879	0.545133
67	53	hsa-miR-575	8.22075	4.85641	4.36324	3.74141	3.27154	4.93944	0	0	2		1.45915	1.45915	0.287429	0.235029	0.545133	0.628879	0.545133
15	14	gmo-miR-30e-3p_R+2_1ss18GA	12.7878	9.71281	9.81729	24.9427	12.2683	9.87888	0	0	2		0.686303	-1.45708	0.0888846	0.361313	-0.543083	0.442116	0.543083
119	124	hsa-miR-550a-3p	0	3.39948	0	2.49427	2.45366	0	2	1	0	1.39124	0.687052	-1.45549	0.692574	0.731327	-0.541509	0.135888	0.541509
120	124	hsa-miR-550a-3p	0	3.39948	0	2.49427	2.45366	0	2	1	0	1.39124	0.687052	-1.45549	0.692574	0.731327	-0.541509	0.135888	0.541509
75	137	mmu-miR-101a-3p_L+1R-1	4556.73	6482.01	7618.76	4121.65	3881.41	4816.97	0	0	2		1.45534	1.45534	0.179395	0.10633	0.541356	0.973343	0.541356
76	138	rno-miR-101b-3p_L+1R-1_1ss17GA	4556.73	6482.01	7618.76	4121.65	3881.41	4816.97	0	0	2		1.45534	1.45534	0.179395	0.10633	0.541356	0.973343	0.541356
254	437	mmu-miR-425-3p_L+1	774.577	558.487	766.84	1204.73	1101.69	746.236	0	0	2		0.687893	-1.45372	0.412325	0.111269	-0.539745	0.953626	0.539745
97	102	hsa-miR-506-3p	20.0952	7.77025	8.72648	6.6514	14.7219	3.79957	0	0	2		1.45362	1.45362	0.811432	0.499699	0.539652	0.301292	0.539652
604	918	mmu-miR-7083-5p	0	22.3395	7.63567	10.8085	9.81463	0	1	1	0	8.43305	1.45347	1.45347	0.433613	0.695505	0.539502	0.1577	0.539502
112	198	mmu-miR-145a-5p	20725.4	13619.3	21468.2	26138.7	23446.7	31531.9	0	0	2		0.688052	-1.45338	0.948908	0.0708844	-0.53941	1.14945	0.53941
164	283	mmu-miR-214-5p	1242.25	1401.56	1640.58	1429.22	2869.96	1924.1	0	0	2		0.688444	-1.45255	0.139553	0.21427	-0.538588	0.669038	0.538588
83	81	cgr-mir-1285-p3	0	0	14.1805	9.14567	11.4504	0	2	1	0	5.7961	0.688507	-1.45242	0.707335	0.734476	-0.538457	0.134023	0.538457
496	792	mmu-mir-3470a-p3	974.615	1843.49	1588.22	705.879	1001.09	1339.35	0	0	2		1.44644	1.44644	0.670032	0.224935	0.532509	0.647944	0.532509
1	1	pma-miR-1c-3p	14.6147	10.6841	5.99946	4.98855	9.81463	6.83923	0	0	2		1.44615	1.44615	0.483321	0.323314	0.53222	0.490376	0.53222
2	1	pma-miR-1c-3p	14.6147	10.6841	5.99946	4.98855	9.81463	6.83923	0	0	2		1.44615	1.44615	0.483321	0.323314	0.53222	0.490376	0.53222
487	780	mmu-miR-3095-3p	14.6147	25.2533	23.9978	41.5712	16.3577	34.1961	0	0	2		0.693251	-1.44248	0.334897	0.314821	-0.52855	0.501936	0.52855
284	284	PC-5p-34061_30	0	10.6841	5.45405	6.6514	0	4.55948	1	1	0	4.55817	1.43951	1.43951	0.576807	0.676563	0.525575	0.169692	0.525575
90	162	mmu-miR-128-3p	657.66	472.043	522.498	1088.33	601.964	686.202	0	0	2		0.695224	-1.43839	0.239967	0.205743	-0.52445	0.686675	0.52445
91	163	mmu-miR-128-3p	657.66	472.043	522.498	1088.33	601.964	686.202	0	0	2		0.695224	-1.43839	0.239967	0.205743	-0.52445	0.686675	0.52445
7	5	mdo-miR-22-3p	270.371	334.121	321.789	346.704	649.401	335.882	0	0	2		0.695413	-1.43799	0.0696798	0.265627	-0.524058	0.575727	0.524058
68	71	rno-miR-349	10.961	6.79897	7.63567	5.81997	6.54308	5.3194	0	0	2		1.43621	1.43621	0.144867	0.123219	0.522262	0.909322	0.522262
107	189	mmu-miR-139-5p_R+1	4024.51	2716.67	3018.27	4459.76	4738.01	4816.34	0	0	2		0.696402	-1.43595	0.139325	0.025824	-0.522007	1.58798	0.522007
283	483	mmu-miR-466q_L+1	0	0	5.45405	0	0	3.79957	2	2	0	1.54227	1.43544	1.43544	0.653491	0.815693	0.521492	0.0884734	0.521492
43	35	hsa-miR-339-3p	0	0	5.45405	0	0	3.79957	2	2	0	1.54227	1.43544	1.43544	0.653491	0.815693	0.521492	0.0884734	0.521492
188	188	PC-3p-101440_5	0	0	5.45405	0	0	3.79957	2	2	0	1.54227	1.43544	1.43544	0.653491	0.815693	0.521492	0.0884734	0.521492
16	26	mmu-let-7a-2-3p_R+1	29.2293	10.6841	6.54486	6.6514	8.99674	16.7181	0	0	2		1.43539	1.43539	0.319468	0.570412	0.521445	0.243811	0.521445
40	70	mmu-miR-24-2-5p	6340.94	4096.86	2993.18	3156.92	3447.39	2753.17	0	0	2		1.43532	1.43532	0.0801864	0.248146	0.521374	0.605292	0.521374
90	71	cpo-miR-769-5p	51.1513	50.5066	46.9048	44.0655	35.1691	24.3173	0	0	2		1.43467	1.43467	0.101633	0.0626437	0.52072	1.20312	0.52072
116	206	mmu-miR-147-3p_L+1R-1	9.13416	10.6841	16.3622	40.7398	7.36097	3.79957	0	0	2		0.697113	-1.43449	0.0673984	0.684118	-0.520535	0.164869	0.520535
286	488	mmu-miR-466h-3p_R+3	42.9306	26.2246	107.445	19.9542	15.1309	88.15	0	0	2		1.43303	1.43303	0.950951	0.630358	0.519072	0.200412	0.519072
61	111	mmu-miR-32-5p_R-1	87.688	115.582	75.2659	71.5025	76.8812	46.3548	0	0	2		1.43031	1.43031	0.767617	0.1397	0.516327	0.854803	0.516327
155	158	hsa-miR-634	20.0952	10.6841	15.2713	12.4714	10.6325	9.11897	0	0	2		1.42913	1.42913	0.225791	0.185328	0.515136	0.732059	0.515136
21	22	mdo-miR-34b-5p_R+2_1ss23TC	54.805	95.1855	32.7243	57.3683	83.4243	120.066	0	0	2		0.700435	-1.42768	0.994409	0.369625	-0.513677	0.432238	0.513677
109	193	mmu-miR-142a-5p_L+2R-1	12892.9	10144.1	9279.52	8867.97	7482.83	6314.13	0	0	2		1.42583	1.42583	0.629309	0.0708303	0.511807	1.14978	0.511807
71	74	aca-miR-363-5p_L+3R-3	0	2.91384	0	0	2.04471	0	2	2	0	0.826426	1.42506	1.42506	0.659892	0.81912	0.511024	0.0866526	0.511024
219	377	mmu-miR-344-3p	17.3549	18.94	19.0892	28.2684	28.217	22.4175	0	0	2		0.701927	-1.42465	0.150991	0.0178128	-0.510608	1.74927	0.510608
220	379	mmu-miR-344-3p	17.3549	18.94	19.0892	28.2684	28.217	22.4175	0	0	2		0.701927	-1.42465	0.150991	0.0178128	-0.510608	1.74927	0.510608
313	532	mmu-miR-491-5p	18.2683	26.2246	57.8129	26.6056	61.3414	57.7535	0	0	2		0.702166	-1.42417	0.909595	0.426414	-0.510117	0.370168	0.510117
411	673	mmu-miR-804	9.13416	9.71281	7.63567	9.14567	4.90731	4.55948	0	0	2		1.42284	1.42284	0.299693	0.176178	0.508778	0.754048	0.508778
65	119	mmu-miR-34a-5p	10557.3	9059.14	13980.9	9817.46	16964.6	21015.4	0	0	2		0.70291	-1.42266	0.330539	0.256977	-0.508588	0.590106	0.508588
197	338	mmu-miR-322-5p	887.841	1011.1	641.396	417.375	736.915	631.489	0	0	2		1.42254	1.42254	0.855931	0.154951	0.508469	0.809805	0.508469
423	689	mmu-miR-883a-3p	32.883	21.8538	18.5438	22.4485	13.9041	15.1983	0	0	2		1.42152	1.42152	0.546759	0.227446	0.507436	0.643122	0.507436
579	891	mmu-miR-7019-3p_R-1	0	5.82769	11.9989	15.7971	4.90731	4.55948	1	0	1		0.705617	-1.4172	0.937158	0.649884	-0.503044	0.187164	0.503044
25	26	ccr-miR-99_R+3	589.153	643.959	398.691	469.755	1114.78	726.858	0	0	2		0.705984	-1.41646	0.271656	0.324182	-0.502293	0.489211	0.502293
218	172	pal-mir-9226-p5_1ss18CA	10.961	17.4831	32.7243	40.3241	26.1723	20.1377	0	0	2		0.706054	-1.41632	0.925109	0.389168	-0.50215	0.409862	0.50215
219	172	pal-mir-9226-p5_1ss18CA	10.961	17.4831	32.7243	40.3241	26.1723	20.1377	0	0	2		0.706054	-1.41632	0.925109	0.389168	-0.50215	0.409862	0.50215
192	329	mmu-miR-301a-5p	76.727	42.7364	44.7232	44.0655	40.8943	31.1565	0	0	2		1.41398	1.41398	0.221194	0.241973	0.499766	0.616233	0.499766
128	227	mmu-miR-181a-1-3p	708.811	399.197	297.791	349.198	348.419	296.746	0	0	2		1.41377	1.41377	0.0386581	0.3828	0.499544	0.417028	0.499544
469	753	mmu-miR-1983	2687.27	1090.75	1650.4	2734.55	2404.58	2525.19	0	0	2		0.70827	-1.41189	0.0815017	0.193595	-0.497629	0.713105	0.497629
27	48	mmu-miR-16-2-3p	69.4196	58.2769	63.267	52.3797	54.7983	28.1168	0	0	2		1.41146	1.41146	0.250332	0.111292	0.49719	0.953537	0.49719
403	663	mmu-miR-744-5p	12519.3	22462.8	22367.1	17075.8	11044.7	12515.8	0	0	2		1.41128	1.41128	0.464992	0.213087	0.497003	0.671444	0.497003
352	594	mmu-miR-669c-5p	602.855	613.85	1133.35	524.629	363.141	778.152	0	0	2		1.41066	1.41066	0.645162	0.343948	0.496374	0.463507	0.496374
198	202	hsa-miR-4508_L+2R-1	14.6147	19.4256	45.814	26.6056	16.3577	13.6785	0	0	2		1.40981	1.40981	0.283245	0.500814	0.495505	0.300323	0.495505
149	152	hsa-miR-618	12.7878	0	0	4.98855	4.08943	0	2	1	0	3.6443	1.40867	1.40867	0.229609	0.798406	0.494329	0.0977765	0.494329
94	168	mmu-miR-130b-5p	173.549	48.5641	160.349	218.665	177.481	142.104	0	0	2		0.710567	-1.40733	0.47488	0.316499	-0.492958	0.499628	0.492958
307	523	mmu-miR-485-3p_L-1R+1	902.455	1519.08	1526.04	1273.74	1988.28	2293.42	0	0	2		0.710579	-1.4073	0.637614	0.217055	-0.492932	0.663429	0.492932
474	760	mmu-miR-3061-5p_R-1	0	6.79897	6.54486	14.9656	0	3.79957	1	1	0	5.35151	0.711094	-1.40628	0.394175	0.736677	-0.491888	0.132723	0.491888
141	248	mmu-miR-191-5p	83853.4	71180.3	56651.2	113706	107078	76600.9	0	0	2		0.711822	-1.40485	0.642346	0.108446	-0.490412	0.964786	0.490412
104	186	mmu-miR-137-3p	0	6.79897	0	4.98855	0	4.55948	2	1	0	2.7245	0.712081	-1.40434	0.663125	0.757555	-0.489888	0.120586	0.489888
250	429	mmu-miR-411-5p	3591.55	7196.22	3631.31	5972.95	8303.17	5950.13	0	0	2		0.712889	-1.40274	0.598142	0.246544	-0.48825	0.608106	0.48825
69	72	rno-miR-351-5p_R+1_1ss24GA	0	5.82769	0	4.15712	0	0	2	2	0	1.66413	1.40186	1.40186	0.674491	0.826931	0.487338	0.0825307	0.487338
62	62	PC-3p-77175_6	0	5.82769	0	4.15712	0	0	2	2	0	1.66413	1.40186	1.40186	0.674491	0.826931	0.487338	0.0825307	0.487338
87	87	PC-3p-78028_6	0	5.82769	0	4.15712	0	0	2	2	0	1.66413	1.40186	1.40186	0.674491	0.826931	0.487338	0.0825307	0.487338
49	52	mdo-miR-210-3p_L-1R+2	0	4.85641	5.45405	0	7.36097	0	1	2	0	2.94524	1.40069	1.40069	0.662591	0.759598	0.486141	0.119416	0.486141
497	794	mmu-mir-3470b-p3_1ss15GA	3923.12	6599.37	6465.23	2890.86	4271	4970.22	0	0	2		1.40023	1.40023	0.659862	0.202699	0.485666	0.693148	0.485666
425	691	mmu-miR-935_L-2	18.2683	16.5118	43.6324	16.6285	19.6293	19.7578	0	0	2		1.39984	1.39984	0.0268617	0.484455	0.485258	0.314746	0.485258
84	67	hsa-miR-644a	4.56708	3.88512	4.36324	2.49427	2.8626	3.79957	0	0	2		1.39961	1.39961	0.42589	0.049571	0.485025	1.30477	0.485025
85	67	hsa-miR-644a	4.56708	3.88512	4.36324	2.49427	2.8626	3.79957	0	0	2		1.39961	1.39961	0.42589	0.049571	0.485025	1.30477	0.485025
81	145	mmu-miR-106b-5p	2343.83	1769.67	2332.15	1624.6	1365.87	1621.66	0	0	2		1.39754	1.39754	0.340068	0.042443	0.482894	1.37219	0.482894
316	316	PC-5p-4330_472	155.281	207.854	285.792	205.362	127.59	131.465	0	0	2		1.39729	1.39729	0.616336	0.248542	0.482636	0.6046	0.482636
347	588	mmu-miR-668-3p	286.813	933.401	853.014	740.799	1004.36	1148.99	0	0	2		0.71635	-1.39596	0.512916	0.310667	-0.481263	0.507705	0.481263
228	392	mmu-miR-365-2-5p	65.766	73.8174	117.808	48.2226	27.8081	108.668	0	0	2		1.39357	1.39357	0.614781	0.452875	0.478789	0.344022	0.478789
598	912	mmu-miR-7069-3p	0	0	5.45405	0	0	7.59914	2	2	0	2.17553	0.717719	-1.3933	0.679974	0.829863	-0.478508	0.0809937	0.478508
281	480	mmu-miR-466e-3p_L-1	31.1866	16.7893	56.4235	38.4336	25.1597	81.7722	0	0	2		0.718186	-1.3924	0.629374	0.544554	-0.477572	0.263959	0.477572
284	485	mmu-miR-466p-3p	31.1866	16.7893	56.4235	38.4336	25.1597	81.7722	0	0	2		0.718186	-1.3924	0.629374	0.544554	-0.477572	0.263959	0.477572
285	486	mmu-miR-466e-3p_L-1	31.1866	16.7893	56.4235	38.4336	25.1597	81.7722	0	0	2		0.718186	-1.3924	0.629374	0.544554	-0.477572	0.263959	0.477572
287	490	mmu-miR-466e-3p_L-1	31.1866	16.7893	56.4235	38.4336	25.1597	81.7722	0	0	2		0.718186	-1.3924	0.629374	0.544554	-0.477572	0.263959	0.477572
288	492	mmu-miR-466e-3p_L-1	31.1866	16.7893	56.4235	38.4336	25.1597	81.7722	0	0	2		0.718186	-1.3924	0.629374	0.544554	-0.477572	0.263959	0.477572
289	494	mmu-miR-466e-3p_L-1	31.1866	16.7893	56.4235	38.4336	25.1597	81.7722	0	0	2		0.718186	-1.3924	0.629374	0.544554	-0.477572	0.263959	0.477572
291	497	mmu-miR-466e-3p_L-1	31.1866	16.7893	56.4235	38.4336	25.1597	81.7722	0	0	2		0.718186	-1.3924	0.629374	0.544554	-0.477572	0.263959	0.477572
458	739	mmu-miR-1955-5p_R-2	23.7488	28.1672	33.8151	54.0426	40.8943	24.3173	0	0	2		0.718894	-1.39103	0.205861	0.28587	-0.476149	0.543832	0.476149
331	563	mmu-miR-542-3p_R+1	233.835	446.789	269.43	190.396	193.021	301.686	0	0	2		1.38673	1.38673	0.473248	0.306363	0.471688	0.513764	0.471688
617	932	mmu-miR-7656-5p_L-2R+2	0	0	13.0897	9.14567	8.99674	0	2	1	0	5.20536	0.721499	-1.386	0.648967	0.766919	-0.470931	0.11525	0.470931
61	61	PC-3p-46328_17	0	0	6.54486	4.15712	4.90731	0	2	1	0	2.60155	0.722037	-1.38497	0.657168	0.768197	-0.469854	0.114528	0.469854
284	220	ggo-let-7i-p5_1ss3GC	0	2.4282	22.3616	4.98855	5.31626	7.59914	1	0	1		1.3846	1.3846	0.0265108	0.777377	0.46947	0.109368	0.46947
248	425	mmu-miR-409-5p	1421.28	2002.78	1131.17	1908.95	2339.97	2057.85	0	0	2		0.722276	-1.38451	0.391331	0.110523	-0.469378	0.956549	0.469378
73	133	mmu-miR-99b-5p	132064	138334	157086	256658	194869	139535	0	0	2		0.723247	-1.38265	0.0941139	0.190715	-0.46744	0.719616	0.46744
80	144	mmu-miR-106a-5p	12.7878	17.4831	8.72648	9.97709	10.6325	7.59914	0	0	2		1.38246	1.38246	0.234256	0.252616	0.467234	0.597539	0.467234
54	97	mmu-miR-30b-5p	13997.2	10592.8	11093.5	6103.49	11024.3	8692.66	0	0	2		1.38199	1.38199	0.715987	0.137413	0.466745	0.861972	0.466745
34	33	dre-miR-143_1ss18GA	21.922	26.2246	0	12.4714	15.5398	6.83923	1	0	1		1.38152	1.38152	0.179245	0.630015	0.466257	0.200649	0.466257
126	99	hsa-miR-1260b_R+2	10.961	0	5.45405	9.97709	7.36097	5.3194	1	0	1		0.724487	-1.38029	0.307212	0.577822	-0.464967	0.238206	0.464967
63	116	mmu-miR-34c-3p	1030.33	1167.48	843.196	779.876	1671.76	1729.56	0	0	2		0.727306	-1.37494	0.170985	0.302524	-0.459366	0.51924	0.459366
84	87	bta-miR-450b	10.0476	2.4282	4.90865	3.3257	2.8626	6.45927	0	0	2		1.37453	1.37453	0.404448	0.563746	0.458936	0.248916	0.458936
85	88	dno-miR-450b-5p_R-1	10.0476	2.4282	4.90865	3.3257	2.8626	6.45927	0	0	2		1.37453	1.37453	0.404448	0.563746	0.458936	0.248916	0.458936
34	28	gga-miR-223_R+4	67.5928	33.0236	30.5427	26.6056	38.4406	30.3966	0	0	2		1.37422	1.37422	0.156923	0.393323	0.45861	0.40525	0.45861
95	170	mmu-miR-130a-5p	16.4415	5.82769	11.9989	6.6514	11.4504	6.83923	0	0	2		1.37397	1.37397	0.412739	0.419007	0.458345	0.377779	0.458345
86	86	PC-3p-44931_18	0	0	23.9978	0	0	17.478	2	2	0	6.91264	1.37303	1.37303	0.693191	0.836926	0.457361	0.0773128	0.457361
39	39	PC-3p-49083_15	0	0	10.9081	4.15712	0	3.79957	2	1	0	3.14413	1.37093	1.37093	0.236056	0.811945	0.455159	0.0904736	0.455159
40	39	hsa-miR-151b_R+4	69.4196	89.8435	40.36	112.658	77.6991	83.2106	0	0	2		0.729703	-1.37042	0.727169	0.242667	-0.454619	0.614989	0.454619
418	683	mmu-miR-877-3p_L-2R+2	464.015	332.178	1103.9	400.747	328.79	657.326	0	0	2		1.37007	1.37007	0.297913	0.544042	0.454246	0.264368	0.454246
209	213	dre-let-7c-5p_L+2	34.7098	38.8512	11.9989	9.97709	54.7983	52.4341	0	0	2		0.729975	-1.36991	0.49456	0.563757	-0.454081	0.248908	0.454081
19	32	mmu-miR-9-3p	32.274	52.1254	17.453	22.4485	33.2607	18.7445	0	0	2		1.368	1.368	0.316458	0.451066	0.452065	0.34576	0.452065
20	34	mmu-miR-9-3p	32.274	52.1254	17.453	22.4485	33.2607	18.7445	0	0	2		1.368	1.368	0.316458	0.451066	0.452065	0.34576	0.452065
21	36	mmu-miR-9-3p	32.274	52.1254	17.453	22.4485	33.2607	18.7445	0	0	2		1.368	1.368	0.316458	0.451066	0.452065	0.34576	0.452065
232	180	pal-miR-9226-5p_L-3	9.13416	18.4543	56.7221	50.7169	42.1211	22.4175	0	0	2		0.731511	-1.36703	0.497345	0.572374	-0.451049	0.24232	0.451049
222	382	mmu-miR-346-5p	32.883	69.9322	39.2692	73.9968	44.9837	75.2315	0	0	2		0.731594	-1.36688	0.855189	0.314353	-0.450884	0.502583	0.450884
38	37	gga-miR-148b-3p_2ss10CT20GT	9.13416	9.22717	6.54486	14.1342	4.08943	0	0	1	1		1.3667	1.3667	0.0839583	0.631019	0.450693	0.199958	0.450693
13	14	dre-miR-27b-3p_R+1	8144.02	7374.94	8904.28	9991.23	12939.8	10404	0	0	2		0.732661	-1.36489	0.373177	0.0438328	-0.448782	1.3582	0.448782
117	207	mmu-miR-148b-5p_R-1	102.303	88.3866	56.7221	80.6482	58.0699	42.5552	0	0	2		1.36485	1.36485	0.804159	0.274862	0.448746	0.560886	0.448746
35	60	mmu-miR-20a-5p	9868.55	5729.59	7952.01	6969.83	4238.28	6069.43	0	0	2		1.36305	1.36305	0.622192	0.220365	0.446837	0.656857	0.446837
42	43	aca-miR-191-5p_R+3	495.072	345.776	266.158	505.506	443.294	560.057	0	0	2		0.733672	-1.36301	0.403503	0.149037	-0.446794	0.826707	0.446794
34	27	gga-mir-223-p5	25.5757	37.88	0	25.7742	31.0796	29.6367	1	0	1		0.733672	-1.36301	0.0395085	0.563546	-0.446793	0.249071	0.446793
476	762	mmu-miR-3064-5p	9.13416	5.82769	18.5438	18.2913	0	27.3569	0	1	1		0.733996	-1.36241	0.366216	0.672914	-0.446156	0.17204	0.446156
49	47	gga-miR-191-5p_R+3	135.186	59.2481	80.72	95.6138	120.229	158.822	0	0	2		0.734399	-1.36166	0.796958	0.318543	-0.445364	0.496833	0.445364
263	450	mmu-miR-450a-1-3p_2ss19AG20AC	75.8135	99.5563	37.0875	61.1097	52.7536	42.1752	0	0	2		1.36157	1.36157	0.166074	0.378565	0.445271	0.42186	0.445271
264	452	mmu-miR-450b-3p	75.8135	99.5563	37.0875	61.1097	52.7536	42.1752	0	0	2		1.36157	1.36157	0.166074	0.378565	0.445271	0.42186	0.445271
199	203	oni-miR-7550_L-1R+2	1527.23	3100.81	5116.99	6759.06	3781.9	2726.57	0	0	2		0.734502	-1.36147	0.850857	0.501918	-0.445161	0.299367	0.445161
342	579	mmu-miR-654-5p	12.7878	8.74153	6.54486	11.6399	8.99674	0	0	1	1		1.3604	1.3604	0.424365	0.566096	0.444035	0.24711	0.444035
449	727	mmu-miR-1943-5p_L-1	21.922	26.2246	37.0875	50.7169	30.2618	34.956	0	0	2		0.735191	-1.36019	0.694567	0.25235	-0.443809	0.597996	0.443809
163	166	hsa-miR-650	9.13416	0	5.45405	5.81997	4.90731	0	1	1	0	4.21925	1.35992	1.35992	0.633787	0.708993	0.443518	0.149358	0.443518
212	367	mmu-miR-341-3p	648.526	1164.57	1233.71	1461.64	1221.1	1453.72	0	0	2		0.736571	-1.35764	0.30882	0.14469	-0.441104	0.839563	0.441104
97	174	mmu-miR-133a-5p	16.4415	13.5979	11.4535	10.3928	11.4504	8.73901	0	0	2		1.35677	1.35677	0.459514	0.091677	0.440173	1.03774	0.440173
98	176	mmu-miR-133a-5p	16.4415	13.5979	11.4535	10.3928	11.4504	8.73901	0	0	2		1.35677	1.35677	0.459514	0.091677	0.440173	1.03774	0.440173
26	46	mmu-miR-16-1-3p_R+1	96.8221	76.7312	140.715	65.6825	70.3382	95.7492	0	0	2		1.35595	1.35595	0.393073	0.261971	0.439302	0.581748	0.439302
6	6	ccr-miR-17-5p_R+2	239.315	90.3291	140.715	118.894	81.7885	146.663	0	0	2		1.35415	1.35415	0.311494	0.437734	0.437389	0.35879	0.437389
268	209	bta-miR-11980_R-1_1ss4CG	18.2683	32.5379	9.27189	16.2128	18.4024	46.7347	0	0	2		0.738515	-1.35407	0.643958	0.584483	-0.437301	0.233228	0.437301
269	209	bta-miR-11980_R-1_1ss4CG	18.2683	32.5379	9.27189	16.2128	18.4024	46.7347	0	0	2		0.738515	-1.35407	0.643958	0.584483	-0.437301	0.233228	0.437301
39	31	hsa-miR-320d	0	8.25589	0	4.57283	2.04471	4.55948	2	0	1		0.738648	-1.35383	0.17064	0.752082	-0.437042	0.123735	0.437042
207	356	mmu-miR-335-5p	2203.16	2029.01	536.679	217.002	1824.7	1481.83	0	0	2		1.35343	1.35343	0.921548	0.595247	0.436616	0.225303	0.436616
134	236	mmu-miR-184-3p	23.7488	9.71281	17.453	14.1342	9.81463	13.6785	0	0	2		1.35313	1.35313	0.204604	0.359608	0.4363	0.44417	0.4363
34	59	mmu-miR-20b-3p_R-1_1ss21AG	27.4025	13.5979	15.2713	20.7856	14.7219	6.07931	0	0	2		1.35311	1.35311	0.980857	0.466791	0.436283	0.330878	0.436283
19	20	gga-miR-30b-5p_R+2	224.7	95.1855	91.6281	69.0082	241.276	246.212	0	0	2		0.739473	-1.35232	0.721676	0.543502	-0.435431	0.264799	0.435431
144	253	mmu-miR-193b-5p	85.8611	159.29	109.081	54.0426	90.7853	117.787	0	0	2		1.34887	1.34887	0.841753	0.343887	0.431749	0.463584	0.431749
329	559	mmu-miR-540-3p_R+2	767.27	1039.27	1039.54	1185.61	1232.55	1417.24	0	0	2		0.742055	-1.34761	0.755745	0.0455875	-0.430401	1.34115	0.430401
109	194	mmu-miR-142a-3p_R-1	1814.04	1439.44	1724.57	981.912	1403.49	1310.09	0	0	2		1.34706	1.34706	0.876823	0.0663267	0.429814	1.17831	0.429814
515	815	mmu-miR-5100_L-1R-1	18.2683	20.3969	22.907	29.9313	8.17885	7.59914	0	0	2		1.34704	1.34704	0.0644031	0.518134	0.429793	0.285558	0.429793
119	211	mmu-miR-149-5p	2475.36	1269.46	2662.67	2591.55	2873.23	3165.04	0	0	2		0.742482	-1.34683	0.251495	0.187782	-0.429572	0.726345	0.429572
343	582	mmu-miR-664-3p_R+1	261.237	237.964	401.418	292.661	510.361	409.594	0	0	2		0.742708	-1.34642	0.794206	0.268544	-0.429133	0.570984	0.429133
523	824	mmu-miR-5122_L+1R-2	9.13416	0	46.9048	39.9084	18.8114	16.7181	1	0	1		0.74285	-1.34617	0.420343	0.709407	-0.428857	0.149104	0.428857
203	159	hsa-miR-7977_R+3_1ss6AG	13.7012	15.0549	18.5438	24.1113	22.0829	17.478	0	0	2		0.742865	-1.34614	0.701569	0.0885488	-0.428828	1.05282	0.428828
204	159	hsa-miR-7977_R+3_1ss6AG	13.7012	15.0549	18.5438	24.1113	22.0829	17.478	0	0	2		0.742865	-1.34614	0.701569	0.0885488	-0.428828	1.05282	0.428828
164	284	mmu-miR-214-3p	80495.7	109783	144578	46248.8	77732.7	124775	0	0	2		1.34612	1.34612	0.794441	0.384064	0.428811	0.415596	0.428811
51	92	mmu-miR-29c-3p_R-1	244.796	302.554	208.89	165.453	210.197	186.179	0	0	2		1.34603	1.34603	0.366725	0.0983692	0.428713	1.00714	0.428713
418	682	mmu-miR-877-5p_R+4	350.752	308.867	811.563	330.075	204.471	558.537	0	0	2		1.3459	1.3459	0.585737	0.546413	0.428572	0.262479	0.428572
128	101	hsa-miR-1260b	5.4805	11.6554	16.3622	9.97709	6.95203	7.9791	0	0	2		1.34486	1.34486	0.147211	0.43113	0.427454	0.365391	0.427454
224	386	mmu-miR-351-3p_R+1	199.125	360.345	153.804	155.476	169.302	205.937	0	0	2		1.34399	1.34399	0.109099	0.398582	0.426519	0.399482	0.426519
209	361	mmu-miR-338-3p_R-1	29.2293	64.1046	59.9946	71.5025	62.9772	71.4319	0	0	2		0.744632	-1.34294	0.124078	0.19779	-0.4254	0.703795	0.4254
250	430	mmu-miR-411-3p_R-1	754.482	1043.16	373.603	713.362	1434.16	759.154	0	0	2		0.746983	-1.33872	0.818269	0.464035	-0.420852	0.33345	0.420852
35	36	pma-miR-145-5p_R+2	506.033	318.58	405.781	419.869	457.198	769.793	0	0	2		0.747115	-1.33848	0.384859	0.323731	-0.420598	0.489816	0.420598
41	72	mmu-miR-24-1-5p_R-2	515.167	291.384	173.439	204.53	328.79	199.098	0	0	2		1.33802	1.33802	0.303111	0.490376	0.4201	0.309471	0.4201
245	192	cja-miR-9933_L-3R-2_1ss12AT	9.13416	9.22717	7.09027	7.89853	6.95203	4.17953	0	0	2		1.33744	1.33744	0.561669	0.179126	0.419474	0.746841	0.419474
258	443	mmu-miR-434-5p_R-1	3012.45	3780.23	2597.22	3301.59	5180.49	4073.9	0	0	2		0.747843	-1.33718	0.575402	0.177686	-0.419193	0.750348	0.419193
261	447	mmu-miR-449a-5p	18.2683	93.243	23.9978	23.2799	51.5268	26.597	0	0	2		1.33633	1.33633	0.24082	0.680981	0.41828	0.166865	0.41828
88	158	mmu-miR-126a-3p_R-1	188.164	217.567	155.986	188.733	329.608	231.014	0	0	2		0.7496	-1.33404	0.307302	0.240074	-0.415807	0.619655	0.415807
139	246	mmu-miR-190a-3p	0	0	7.63567	0	5.7252	0	2	2	0	2.22681	1.3337	1.3337	0.71975	0.851103	0.415429	0.0700176	0.415429
339	574	mmu-miR-615-5p	0	0	5.45405	0	4.08943	0	2	2	0	1.59058	1.3337	1.3337	0.71975	0.851103	0.415429	0.0700176	0.415429
138	244	mmu-miR-188-3p	16.4415	4.85641	15.2713	10.8085	9.81463	6.83923	0	0	2		1.33161	1.33161	0.189846	0.476706	0.413175	0.32175	0.413175
390	648	mmu-miR-708-5p	3924.04	6824.22	6413.96	5329.43	3870.23	3695.46	0	0	2		1.33091	1.33091	0.492601	0.244633	0.41241	0.611486	0.41241
46	44	gmo-miR-181b-5p_R+2	9.13416	0	6.54486	0	5.7252	6.07931	1	1	0	4.58059	1.32822	1.32822	0.688853	0.720014	0.409497	0.142659	0.409497
49	88	mmu-miR-28c_L+1R+1	80.3806	73.3317	55.6313	115.014	65.5672	97.3957	0	0	2		0.753098	-1.32785	0.411271	0.231564	-0.40909	0.63533	0.40909
332	565	mmu-miR-543-3p_R+1	374.501	515.75	142.896	378.298	561.887	431.631	0	0	2		0.753123	-1.3278	0.402182	0.405741	-0.409042	0.391752	0.409042
53	95	mmu-miR-29b-2-5p_R-2	76.727	104.898	99.2637	123.051	115.322	134.505	0	0	2		0.753301	-1.32749	0.590759	0.0403125	-0.408701	1.39456	0.408701
108	191	mmu-miR-140-5p	3872.88	3674.36	3828.74	2628.96	2663.04	3278.27	0	0	2		1.32738	1.32738	0.15049	0.0130258	0.408579	1.88519	0.408579
241	414	mmu-miR-378b_R-1	15.8325	15.5405	15.9986	12.1942	13.9041	9.62558	0	0	2		1.32605	1.32605	0.0229249	0.087405	0.407134	1.05846	0.407134
23	39	mmu-miR-10b-5p_R-1	1019.37	2182.47	1395.69	1222.19	3366.42	1504.63	0	0	2		0.75453	-1.32533	0.412089	0.545053	-0.40635	0.263561	0.40635
105	82	cgr-miR-1260	2926.59	2036.29	3722.94	2554.97	1906.49	2095.46	0	0	2		1.32468	1.32468	0.27025	0.246968	0.405642	0.607359	0.405642
106	82	cgr-miR-1260	2926.59	2036.29	3722.94	2554.97	1906.49	2095.46	0	0	2		1.32468	1.32468	0.27025	0.246968	0.405642	0.607359	0.405642
100	179	mmu-miR-134-5p	2257.96	4290.15	3620.4	4730.8	4392.05	4340.63	0	0	2		0.755266	-1.32404	0.0804387	0.146295	-0.404943	0.834771	0.404943
47	45	mdo-miR-181b-5p_R+3	10.961	0	11.9989	17.4599	0	12.9185	1	1	0	8.88973	0.755796	-1.32311	0.700132	0.722453	-0.403932	0.14119	0.403932
286	222	dre-let-7a_R-4_1ss18TA	4.56708	12.6267	2.72703	5.81997	15.1309	5.3194	0	0	2		0.758301	-1.31874	0.951757	0.656112	-0.399157	0.183022	0.399157
210	362	mmu-miR-339-5p	3606.17	3238.25	7523.32	6656.38	6404.04	5886.29	0	0	2		0.758323	-1.3187	0.0532	0.333757	-0.399115	0.47657	0.399115
10	13	efu-mir-9277-p3_1ss5CT	0	4.85641	7.63567	6.6514	9.81463	0	1	1	0	4.82635	0.758658	-1.31812	0.746191	0.735231	-0.398479	0.133576	0.398479
250	196	pal-miR-9993a-3p_L+2_1	0	5.82769	0	3.3257	2.45366	1.89979	2	0	1		0.758898	-1.3177	0.0873069	0.771554	-0.398021	0.112633	0.398021
251	196	pal-miR-9993a-3p_L+2_1	0	5.82769	0	3.3257	2.45366	1.89979	2	0	1		0.758898	-1.3177	0.0873069	0.771554	-0.398021	0.112633	0.398021
258	201	pal-miR-9993a-3p_L+2_2	0	5.82769	0	3.3257	2.45366	1.89979	2	0	1		0.758898	-1.3177	0.0873069	0.771554	-0.398021	0.112633	0.398021
305	520	mmu-miR-483-3p_L-1R+2	0	17.4831	13.0897	0	5.7252	17.478	1	1	0	8.96267	1.31761	1.31761	0.979529	0.755036	0.397923	0.122032	0.397923
376	629	mmu-miR-687	10.961	0	0	4.15712	5.7252	4.55948	2	0	1		0.758977	-1.31756	0.0325845	0.781763	-0.397872	0.106925	0.397872
336	570	mmu-miR-582-5p_L-1R+1	25.5757	14.5692	20.7254	56.5369	11.4504	12.1586	0	0	2		0.759493	-1.31667	0.0872415	0.695144	-0.396891	0.157925	0.396891
105	187	mmu-miR-138-5p	28.3159	33.9948	27.8157	35.3355	33.1244	50.1543	0	0	2		0.759828	-1.31609	0.241573	0.171157	-0.396255	0.766605	0.396255
106	188	mmu-miR-138-5p	28.3159	33.9948	27.8157	35.3355	33.1244	50.1543	0	0	2		0.759828	-1.31609	0.241573	0.171157	-0.396255	0.766605	0.396255
33	57	mmu-miR-19a-3p	102.303	62.162	173.439	39.0769	44.1658	174.02	0	0	2		1.31345	1.31345	0.703729	0.649747	0.393366	0.187256	0.393366
181	311	mmu-miR-296-3p	412.864	528.377	534.497	527.954	372.956	222.655	0	0	2		1.31344	1.31344	0.335423	0.291138	0.393353	0.535901	0.393353
239	411	mmu-miR-378a-5p	453.054	424.45	1009	867.176	777.809	831.346	0	0	2		0.761814	-1.31266	0.0365703	0.410252	-0.392489	0.386949	0.392489
183	183	PC-3p-47270_16	0	0	15.2713	11.6399	0	0	2	2	0	4.48521	1.31198	1.31198	0.734947	0.859207	0.391743	0.065902	0.391743
118	210	mmu-miR-148a-3p	50415.1	44761.5	31588.8	35259.9	32289.7	29144.2	0	0	2		1.311	1.311	0.182189	0.161787	0.390665	0.791055	0.390665
79	81	cja-miR-429	12.7878	7.77025	0	9.14567	6.54308	0	1	1	0	6.04114	1.31037	1.31037	0.696966	0.742469	0.389975	0.129322	0.389975
303	517	mmu-miR-470-5p	12.7878	6.79897	11.9989	9.97709	6.54308	7.59914	0	0	2		1.30956	1.30956	0.45224	0.30861	0.389083	0.510591	0.389083
192	330	mmu-miR-301a-3p	316.042	319.551	313.063	225.316	203.653	295.607	0	0	2		1.30926	1.30926	0.00908916	0.114122	0.388748	0.942629	0.388748
467	750	mmu-miR-1981-3p_R+1	126.051	113.64	103.627	169.611	163.577	116.267	0	0	2		0.763855	-1.30915	0.257653	0.12185	-0.388628	0.914175	0.388628
7	8	rno-miR-3547_R-1_1ss22AT	0	6.79897	11.9989	7.48282	5.7252	11.3987	1	0	1		0.763932	-1.30902	0.377912	0.642076	-0.388483	0.192414	0.388483
328	557	mmu-miR-539-5p_R+1	43.844	37.88	19.6346	23.2799	74.4276	34.956	0	0	2		0.764027	-1.30885	0.362607	0.574731	-0.388304	0.240535	0.388304
42	41	dre-miR-152_R-1_2ss20TG21GA	58.4586	116.068	79.6291	61.5254	71.156	61.553	0	0	2		1.3085	1.3085	0.070066	0.30831	0.387914	0.511012	0.387914
129	229	mmu-miR-181b-1-3p_1ss21AT	31.0562	22.3395	23.9978	27.437	18.8114	12.9185	0	0	2		1.30805	1.30805	0.573294	0.290434	0.387421	0.536953	0.387421
428	696	mmu-miR-1191b-5p	0	4.85641	6.54486	4.15712	0	4.55948	1	1	0	3.35298	1.30799	1.30799	0.71128	0.732777	0.387356	0.135028	0.387356
30	24	aca-miR-146a-5p_R+2	63.9391	133.066	27.2703	41.5712	65.4308	64.5927	0	0	2		1.307	1.307	0.11946	0.612215	0.386263	0.213096	0.386263
311	311	PC-3p-16006_93	0	9.71281	34.9059	28.2684	5.7252	24.3173	1	0	1		0.765187	-1.30687	0.61732	0.733704	-0.386115	0.134479	0.386115
292	499	mmu-miR-466m-3p_R+1	0	0	11.9989	4.98855	0	10.6388	2	1	0	4.60438	0.767815	-1.3024	0.742429	0.822281	-0.381169	0.0849798	0.381169
440	712	mmu-miR-1306-5p_L-2	226.527	221.452	521.407	240.282	208.561	295.607	0	0	2		1.30215	1.30215	0.12348	0.504472	0.380899	0.297163	0.380899
222	174	efu-mir-9226-p3_1ss17GA_2	15.5281	25.2533	41.9962	42.4026	37.2138	28.1168	0	0	2		0.768357	-1.30148	0.451709	0.397314	-0.380152	0.400866	0.380152
228	178	efu-mir-9226-p3_1ss17GA_1	15.5281	25.2533	41.9962	42.4026	37.2138	28.1168	0	0	2		0.768357	-1.30148	0.451709	0.397314	-0.380152	0.400866	0.380152
229	178	efu-mir-9226-p3_1ss17GA_1	15.5281	25.2533	41.9962	42.4026	37.2138	28.1168	0	0	2		0.768357	-1.30148	0.451709	0.397314	-0.380152	0.400866	0.380152
230	179	efu-mir-9226-p3_1ss17GA_3	15.5281	25.2533	41.9962	42.4026	37.2138	28.1168	0	0	2		0.768357	-1.30148	0.451709	0.397314	-0.380152	0.400866	0.380152
231	179	efu-mir-9226-p3_1ss17GA_3	15.5281	25.2533	41.9962	42.4026	37.2138	28.1168	0	0	2		0.768357	-1.30148	0.451709	0.397314	-0.380152	0.400866	0.380152
235	182	efu-mir-9226-p5_1ss17GA	15.5281	25.2533	41.9962	42.4026	37.2138	28.1168	0	0	2		0.768357	-1.30148	0.451709	0.397314	-0.380152	0.400866	0.380152
286	487	mmu-miR-466h-5p_R+1	14.6147	14.5692	34.9059	20.7856	18.8114	43.7296	0	0	2		0.76914	-1.30015	0.835106	0.573666	-0.378682	0.241341	0.378682
262	448	mmu-miR-450a-5p	607.422	774.597	389.419	406.151	543.894	413.013	0	0	2		1.29961	1.29961	0.278093	0.320643	0.378074	0.493978	0.378074
263	449	mmu-miR-450a-5p	607.422	774.597	389.419	406.151	543.894	413.013	0	0	2		1.29961	1.29961	0.278093	0.320643	0.378074	0.493978	0.378074
240	413	mmu-miR-378c_R-1	817.812	931.944	1011.91	978.725	545.53	601.599	0	0	2		1.29909	1.29909	0.292698	0.223391	0.377496	0.650934	0.377496
166	166	PC-3p-14606_104	14.6147	24.282	15.2713	15.7971	6.54308	47.8746	0	0	2		0.771462	-1.29624	0.1168	0.699797	-0.374332	0.155028	0.374332
253	434	mmu-miR-423-5p	7659.91	10025.6	16762.5	9686.09	6275.64	10633.5	0	0	2		1.29527	1.29527	0.381226	0.436506	0.373252	0.36001	0.373252
517	818	mmu-miR-5104_L-1R-1	49.3245	14.5692	51.2681	44.0655	22.0829	22.7974	0	0	2		1.29474	1.29474	0.535729	0.56457	0.372663	0.248282	0.372663
232	232	PC-3p-10846_151	21.922	21.3682	18.5438	15.7971	37.6227	26.597	0	0	2		0.772762	-1.29406	0.0536494	0.396373	-0.371904	0.401896	0.371904
126	222	mmu-miR-181c-5p	63.9391	133.066	114.535	103.928	157.034	142.104	0	0	2		0.772925	-1.29379	0.738865	0.305979	-0.3716	0.514308	0.3716
176	304	mmu-miR-223-3p_R+1	20204.8	15352.1	13857.7	9415.88	15729.6	13072	0	0	2		1.29298	1.29298	0.954296	0.231712	0.370701	0.635051	0.370701
126	223	mmu-miR-181c-3p	43.844	19.4256	33.8151	19.1228	40.8943	15.1983	0	0	2		1.29076	1.29076	0.88031	0.532404	0.368218	0.273758	0.368218
315	535	mmu-miR-494-5p	9.13416	0	6.54486	4.15712	12.2683	3.79957	1	0	1		0.775231	-1.28994	0.98276	0.715859	-0.367302	0.145173	0.367302
225	387	mmu-miR-361-5p	3450.89	3391.71	2953.91	4759.9	4095.15	3757.78	0	0	2		0.77671	-1.28748	0.44168	0.0480807	-0.364552	1.31803	0.364552
200	156	gmo-miR-7550-5p_L-1R+2	111.437	204.94	437.415	495.945	286.669	187.699	0	0	2		0.776855	-1.28724	0.935647	0.615787	-0.364283	0.21057	0.364283
56	102	mmu-miR-30c-2-3p	736.214	535.176	707.936	891.287	760.633	895.939	0	0	2		0.776858	-1.28724	0.665021	0.0693777	-0.364277	1.15878	0.364277
356	599	mmu-miR-669l-5p	34.7098	23.3107	29.4519	44.0655	8.99674	59.2733	0	0	2		0.778671	-1.28424	0.093352	0.615604	-0.360914	0.210698	0.360914
480	769	mmu-miR-3072-3p	120.571	162.204	395.964	192.89	256.816	421.752	0	0	2		0.778854	-1.28394	0.775112	0.588992	-0.360576	0.229891	0.360576
326	554	mmu-miR-511-3p	2234.22	2295.14	1719.12	1356.88	1584.24	1928.66	0	0	2		1.28311	1.28311	0.905661	0.136301	0.359643	0.865502	0.359643
167	128	hsa-miR-4286_R+3_1	0	4.37077	4.36324	4.57283	2.45366	4.17953	1	0	1		0.779403	-1.28303	0.333185	0.632576	-0.359558	0.198887	0.359558
168	128	hsa-miR-4286_R+3_1	0	4.37077	4.36324	4.57283	2.45366	4.17953	1	0	1		0.779403	-1.28303	0.333185	0.632576	-0.359558	0.198887	0.359558
171	130	hsa-miR-4286_R+3_2	0	4.37077	4.36324	4.57283	2.45366	4.17953	1	0	1		0.779403	-1.28303	0.333185	0.632576	-0.359558	0.198887	0.359558
172	130	hsa-miR-4286_R+3_2	0	4.37077	4.36324	4.57283	2.45366	4.17953	1	0	1		0.779403	-1.28303	0.333185	0.632576	-0.359558	0.198887	0.359558
92	90	gmo-let-7f-5p_R+2_2	180.856	110.24	64.3578	147.162	160.714	148.183	0	0	2		0.779403	-1.28303	0.0325383	0.426918	-0.359558	0.369656	0.359558
207	211	gmo-let-7f-5p_R+2_1	180.856	110.24	64.3578	147.162	160.714	148.183	0	0	2		0.779403	-1.28303	0.0325383	0.426918	-0.359558	0.369656	0.359558
127	130	hsa-miR-572	10.961	0	9.81729	8.31424	4.08943	3.79957	1	0	1		1.28235	1.28235	0.299168	0.7067	0.358794	0.150765	0.358794
363	609	mmu-miR-670-5p	16.4415	5.82769	5.45405	7.48282	6.54308	7.59914	0	0	2		1.282	1.282	0.0170841	0.629886	0.358392	0.200738	0.358392
385	641	mmu-miR-700-3p	1437.72	1231.58	1637.31	2665.55	1594.06	1250.82	0	0	2		0.781538	-1.27953	0.140533	0.415167	-0.355611	0.381778	0.355611
15	24	mmu-let-7k_R+1_1ss9GT	0	2.91384	0	0	0	2.27974	2	2	0	0.865598	1.27815	1.27815	0.7594	0.872236	0.354053	0.059366	0.354053
398	657	mmu-miR-717	0	4.85641	0	0	0	3.79957	2	2	0	1.44266	1.27815	1.27815	0.7594	0.872236	0.354053	0.059366	0.354053
24	23	dre-miR-99_R+1	20842.3	20566.9	14685.6	16521.7	33155.4	21925.8	0	0	2		0.783415	-1.27646	0.287659	0.384165	-0.352151	0.415482	0.352151
67	123	mmu-miR-92a-1-5p	80.3806	28.1672	19.6346	29.0999	94.8747	39.5155	0	0	2		0.784037	-1.27545	0.927775	0.694597	-0.351006	0.158267	0.351006
402	661	mmu-miR-743b-5p	16.4415	11.6554	10.9081	14.9656	6.54308	9.11897	0	0	2		1.27352	1.27352	0.652233	0.409651	0.348821	0.387586	0.348821
107	190	mmu-miR-139-3p_R+1	73.0733	78.6738	44.7232	51.5483	44.9837	57.7535	0	0	2		1.27342	1.27342	0.219195	0.275307	0.348709	0.560183	0.348709
568	879	mmu-miR-6983-5p	9.13416	12.6267	5.45405	13.3028	11.4504	9.87888	0	0	2		0.785828	-1.27254	0.371774	0.341994	-0.347714	0.465982	0.347714
107	83	cgr-miR-1260_R+2	6.39391	2.91384	4.36324	3.74141	2.45366	4.55948	0	0	2		1.27118	1.27118	0.538867	0.456593	0.346171	0.340471	0.346171
345	584	mmu-miR-666-5p_R-1	204.605	313.724	290.156	376.635	307.525	343.481	0	0	2		0.786738	-1.27107	0.53198	0.13206	-0.346045	0.879229	0.346045
512	812	mmu-mir-3970-p5_1ss7TA	5.4805	12.6267	9.81729	19.5385	15.9488	0	0	1	1		0.786887	-1.27083	0.21401	0.71182	-0.345772	0.14763	0.345772
197	153	gmo-miR-7550-5p_L-1R+1	137.012	358.403	790.292	910.41	382.77	338.922	0	0	2		0.787762	-1.26942	0.956358	0.686121	-0.344169	0.1636	0.344169
226	389	mmu-miR-362-5p	2796.88	1729.85	1792.2	1785.9	1576.88	1616.34	0	0	2		1.26909	1.26909	0.0664888	0.272925	0.34379	0.563956	0.34379
144	144	PC-5p-50292_14	9.13416	0	0	7.48282	4.08943	0	2	1	0	3.45107	0.789316	-1.26692	0.670905	0.838396	-0.341325	0.0765508	0.341325
69	69	PC-3p-50754_14	0	0	11.9989	0	0	15.1983	2	2	0	4.53287	0.789491	-1.26664	0.767939	0.876782	-0.341005	0.0571082	0.341005
221	381	mmu-miR-345-3p_R-1_1ss21AT	464.015	451.646	555.222	813.133	467.013	577.535	0	0	2		0.791785	-1.26297	0.185756	0.295272	-0.336819	0.529778	0.336819
59	107	mmu-miR-30e-5p_R+2	19901.5	19621.3	19445.3	16379.5	14632	15711.2	0	0	2		1.26209	1.26209	0.127474	0.00148758	0.335814	2.82752	0.335814
191	328	mmu-miR-300-3p	1158.21	1506.46	1241.34	1330.28	2071.7	1523.63	0	0	2		0.793	-1.26103	0.365525	0.238658	-0.334607	0.622225	0.334607
256	440	mmu-miR-431-3p_L+2R-1	319.696	314.695	390.51	505.506	292.803	493.184	0	0	2		0.793578	-1.26012	0.223961	0.291279	-0.333556	0.535691	0.333556
89	87	pal-miR-9993b-3p	2106.34	2465.11	2670.3	2675.52	1545.8	1526.67	0	0	2		1.25987	1.25987	0.3169	0.29543	0.33328	0.529545	0.33328
369	619	mmu-miR-676-5p	21.922	34.9661	8.72648	14.9656	20.4471	16.7181	0	0	2		1.25865	1.25865	0.0870958	0.592835	0.331878	0.227066	0.331878
124	220	mmu-miR-154-3p	100.476	134.037	51.2681	50.7169	76.0633	100.309	0	0	2		1.25845	1.25845	0.523796	0.52289	0.331651	0.281589	0.331651
177	134	ssc-mir-4335-p3_1ss2CG	0	4.37077	0	2.07856	0	3.41961	2	1	0	1.64482	0.794948	-1.25794	0.63594	0.841726	-0.331067	0.0748295	0.331067
225	388	mmu-miR-361-3p_L-1	1149.08	1361.74	1680.94	2077.73	1544.99	1645.21	0	0	2		0.795712	-1.25674	0.944077	0.186024	-0.329683	0.730432	0.329683
15	13	gmo-miR-30e-5p_R+1	61.1989	39.8225	51.2681	36.9984	35.578	48.6345	0	0	2		1.2564	1.2564	0.619208	0.235839	0.329297	0.627385	0.329297
268	268	PC-3p-32101_34	9.13416	19.4256	8.72648	4.15712	17.1756	8.35906	0	0	2		1.25578	1.25578	0.908705	0.65143	0.328581	0.186132	0.328581
223	384	mmu-miR-350-3p	739.867	541.004	770.112	394.927	637.951	601.852	0	0	2		1.25463	1.25463	0.947843	0.254522	0.327264	0.594275	0.327264
360	606	mmu-miR-669f-3p	20.0952	9.71281	55.6313	20.7856	17.1756	69.1522	0	0	2		0.797653	-1.25368	0.815447	0.756683	-0.326167	0.121086	0.326167
40	32	cpo-miR-328-3p_R-2	8.22075	9.22717	10.9081	17.4599	8.5878	9.49893	0	0	2		0.797713	-1.25358	0.143657	0.458523	-0.326058	0.338638	0.326058
41	32	cpo-miR-328-3p_R-2	8.22075	9.22717	10.9081	17.4599	8.5878	9.49893	0	0	2		0.797713	-1.25358	0.143657	0.458523	-0.326058	0.338638	0.326058
64	118	mmu-miR-34b-3p	1790.3	1865.83	1197.71	1269.59	2777.54	2031.25	0	0	2		0.798542	-1.25228	0.381206	0.446397	-0.32456	0.350278	0.32456
208	359	mmu-miR-337-3p_L+1_1ss22TC	42.0171	80.6163	97.0821	68.1768	121.047	85.8703	0	0	2		0.798692	-1.25205	0.95104	0.458654	-0.324288	0.338515	0.324288
467	749	mmu-miR-1981-5p	1238.59	1871.66	1740.93	1818.33	934.843	1124.67	0	0	2		1.251	1.251	0.681127	0.382031	0.323083	0.417902	0.323083
288	491	mmu-miR-466c-5p_R-2	31.0562	19.4256	118.898	33.257	31.0796	71.4319	0	0	2		1.24756	1.24756	0.296628	0.758452	0.319115	0.120072	0.319115
297	506	mmu-miR-467c-5p	153.454	58.2769	102.536	104.759	68.2116	79.0311	0	0	2		1.24708	1.24708	0.268968	0.521263	0.318554	0.282943	0.318554
205	209	oni-miR-10955_L-1_1ss10TC	1158.21	732.346	574.857	880.478	687.842	408.834	0	0	2		1.24695	1.24695	0.763467	0.503397	0.318405	0.29809	0.318405
246	423	mmu-miR-383-5p	27.4025	36.9087	7.63567	20.7856	17.1756	19.7578	0	0	2		1.2465	1.2465	0.0305518	0.638457	0.317886	0.194868	0.317886
199	343	mmu-miR-324-3p_L-2R+3	847.65	833.359	1788.93	1394.3	1428.03	1498.55	0	0	2		0.803063	-1.24523	0.0186969	0.46461	-0.316414	0.332911	0.316414
198	154	oni-miR-7550_L-1R+1	664.054	1210.22	1953.1	2456.03	1412.08	896.699	0	0	2		0.803257	-1.24493	0.797553	0.625281	-0.316066	0.203925	0.316066
249	428	mmu-miR-410-3p	886.014	1281.12	774.475	1095.82	1411.67	1150.51	0	0	2		0.804158	-1.24354	0.573498	0.259716	-0.314449	0.585502	0.314449
114	201	mmu-miR-146b-5p_R+2	4132.3	5980.66	3366.79	7158.98	4856.6	4741.86	0	0	2		0.804403	-1.24316	0.985371	0.378885	-0.314009	0.421493	0.314009
76	74	cgr-miR-532-5p_R+2_2	34.7098	24.282	37.0875	44.0655	44.1658	31.1565	0	0	2		0.804767	-1.2426	0.906357	0.25429	-0.313356	0.59467	0.313356
111	117	cgr-miR-532-5p_R+2_1	34.7098	24.282	37.0875	44.0655	44.1658	31.1565	0	0	2		0.804767	-1.2426	0.906357	0.25429	-0.313356	0.59467	0.313356
49	41	hsa-miR-378d_R+1	0	0	7.63567	4.15712	0	5.3194	2	1	0	2.85203	0.805746	-1.24109	0.573925	0.848622	-0.311602	0.0712858	0.311602
50	41	hsa-miR-378d_R+1	0	0	7.63567	4.15712	0	5.3194	2	1	0	2.85203	0.805746	-1.24109	0.573925	0.848622	-0.311602	0.0712858	0.311602
242	416	mmu-miR-379-3p_R-1	294.12	473.985	172.893	276.864	563.932	326.763	0	0	2		0.805954	-1.24077	0.987652	0.576766	-0.311231	0.239001	0.311231
330	561	mmu-miR-541-3p	31.0562	54.3917	52.3589	30.7627	40.8943	39.5155	0	0	2		1.23958	1.23958	0.306107	0.335094	0.309847	0.474833	0.309847
327	556	mmu-miR-532-3p	2247	2028.03	3909.46	2070.25	2133.86	2402.85	0	0	2		1.23877	1.23877	0.0572068	0.432189	0.308909	0.364327	0.308909
364	611	mmu-miR-671-3p	396.423	293.327	332.697	429.846	392.585	443.79	0	0	2		0.807479	-1.23842	0.411335	0.073467	-0.308504	1.13391	0.308504
115	203	mmu-miR-146a-5p	110237	84981.8	76438	147035	112821	76236.1	0	0	2		0.808279	-1.2372	0.395348	0.399911	-0.307075	0.398036	0.307075
174	177	rno-miR-743b-3p	16.4415	8.74153	6.54486	10.8085	5.7252	9.11897	0	0	2		1.23683	1.23683	0.39761	0.578365	0.306641	0.237798	0.306641
353	595	mmu-miR-669e-5p_R+1	14.6147	4.85641	14.1805	18.2913	7.36097	15.9582	0	0	2		0.808728	-1.23651	0.956773	0.595161	-0.306273	0.225365	0.306273
438	710	mmu-miR-1249-3p	3816.25	3247.96	9108.27	3588.43	3349.24	6175.06	0	0	2		1.23334	1.23334	0.380679	0.648606	0.302573	0.188019	0.302573
115	90	cgr-miR-1260_R+2_1ss9GA	4.56708	14.5692	34.9059	18.2913	11.8593	13.6785	0	0	2		1.23302	1.23302	0.0879429	0.728124	0.302197	0.137795	0.302197
116	90	cgr-miR-1260_R+2_1ss9GA	4.56708	14.5692	34.9059	18.2913	11.8593	13.6785	0	0	2		1.23302	1.23302	0.0879429	0.728124	0.302197	0.137795	0.302197
9	14	mmu-let-7j_R-1_1ss8TG	12473.6	17458.3	10553	22730.7	13766.6	13381.3	0	0	2		0.811668	-1.23203	0.624399	0.443091	-0.301038	0.353507	0.301038
171	171	PC-5p-21381_63	0	8.74153	28.3611	14.1342	16.3577	15.1983	1	0	1		0.812047	-1.23146	0.0116572	0.76567	-0.300365	0.115959	0.300365
54	57	dre-miR-223_R+4	47.4976	50.5066	35.9967	13.3028	40.0764	55.4737	0	0	2		1.23103	1.23103	0.228174	0.556756	0.299864	0.254335	0.299864
59	57	gga-miR-218-5p_R+2	168.982	410.852	169.076	219.496	351.282	351.08	0	0	2		0.812391	-1.23093	0.457428	0.564018	-0.299753	0.248707	0.299753
60	58	oni-miR-218a_R+1	168.982	410.852	169.076	219.496	351.282	351.08	0	0	2		0.812391	-1.23093	0.457428	0.564018	-0.299753	0.248707	0.299753
8	6	xtr-miR-24b_R-2	6.39391	11.6554	8.72648	12.8871	14.7219	5.3194	0	0	2		0.813151	-1.22978	0.437253	0.562883	-0.298405	0.249581	0.298405
9	6	xtr-miR-24b_R-2	6.39391	11.6554	8.72648	12.8871	14.7219	5.3194	0	0	2		0.813151	-1.22978	0.437253	0.562883	-0.298405	0.249581	0.298405
55	100	mmu-miR-30c-1-3p	63.9391	76.7312	99.2637	110.579	81.7885	102.588	0	0	2		0.813456	-1.22932	0.816996	0.243679	-0.297864	0.613182	0.297864
243	418	mmu-miR-380-3p_R-1	213.739	205.912	61.0854	149.656	221.647	219.615	0	0	2		0.813541	-1.22919	0.370488	0.540728	-0.297713	0.267021	0.297713
310	528	mmu-miR-487b-3p	109.61	164.147	75.2659	103.097	183.206	142.104	0	0	2		0.814698	-1.22745	0.888158	0.488284	-0.295662	0.311328	0.295662
12	12	hhi-miR-26_R+3	1231.29	1496.74	880.284	1118.27	1731.46	1575.3	0	0	2		0.815432	-1.22634	0.969918	0.348125	-0.294363	0.458265	0.294363
365	612	mmu-miR-672-5p	0	66.0471	30.5427	22.4485	23.7187	32.6763	1	0	1		1.22508	1.22508	0.0553125	0.775116	0.29288	0.110633	0.29288
26	25	dre-miR-103_R+1	255.757	382.199	237.797	418.622	321.838	332.082	0	0	2		0.81652	-1.22471	0.62676	0.297655	-0.29244	0.526287	0.29244
193	332	mmu-miR-301b-3p	47.4976	25.2533	38.1784	41.5712	16.3577	32.6763	0	0	2		1.22431	1.22431	0.865641	0.527535	0.291974	0.277748	0.291974
336	571	mmu-miR-582-3p_L-3R+4	16.4415	8.74153	20.7254	29.0999	17.1756	9.87888	0	0	2		0.81754	-1.22318	0.562895	0.632559	-0.290639	0.198899	0.290639
47	49	gmo-miR-199-3p_R+2	1884.38	2555.93	1341.15	1498.23	2796.76	2776.73	0	0	2		0.817547	-1.22317	0.801657	0.481584	-0.290627	0.317328	0.290627
130	230	mmu-miR-181d-5p	392.16	511.218	330.515	462.272	540.077	506.863	0	0	2		0.817575	-1.22313	0.305995	0.186475	-0.290578	0.729379	0.290578
315	536	mmu-miR-494-3p_R+1	1395.7	1614.27	1001.36	1502.38	1939.21	1462.83	0	0	2		0.817901	-1.22264	0.840099	0.274826	-0.290002	0.560942	0.290002
51	91	mmu-miR-29c-5p_L-2R+3	45.6708	50.5066	143.987	93.951	91.6032	107.908	0	0	2		0.818383	-1.22192	0.0493429	0.636141	-0.289151	0.196446	0.289151
11	17	mmu-let-7c-5p	85765.5	100035	65170.2	100964	98155.3	107257	0	0	2		0.81916	-1.22076	0.132056	0.152556	-0.287782	0.81657	0.287782
12	19	mmu-let-7c-5p	85765.5	100035	65170.2	100964	98155.3	107257	0	0	2		0.81916	-1.22076	0.132056	0.152556	-0.287782	0.81657	0.287782
16	25	mmu-let-7a-5p_1ss19AG	85765.5	100035	65170.2	100964	98155.3	107257	0	0	2		0.81916	-1.22076	0.132056	0.152556	-0.287782	0.81657	0.287782
415	679	mmu-miR-874-3p_R+1	45.6708	91.3004	121.08	109.748	64.613	140.584	0	0	2		0.819353	-1.22048	0.994014	0.574994	-0.287443	0.240337	0.287443
213	369	mmu-miR-342-3p	20078.7	14022.4	20423.2	19577.6	23158.4	23808.1	0	0	2		0.819372	-1.22045	0.571886	0.178682	-0.28741	0.747919	0.28741
267	208	oni-miR-10926	286.813	242.82	186.529	230.305	189.749	167.181	0	0	2		1.21955	1.21955	0.576406	0.279666	0.286347	0.55336	0.286347
228	228	PC-5p-53193_13	0	0	5.45405	6.6514	0	0	2	2	0	2.01757	0.819986	-1.21953	0.804097	0.896019	-0.286329	0.0476826	0.286329
403	664	mmu-miR-744-3p_R-1	51.1513	37.88	42.5416	36.5827	41.7122	29.6367	0	0	2		1.21904	1.21904	0.895179	0.206345	0.285746	0.685407	0.285746
295	503	mmu-miR-467b-5p_L-1R+1	43.844	32.0523	30.8154	29.7234	35.2918	22.6074	0	0	2		1.21785	1.21785	0.877394	0.314907	0.284342	0.501818	0.284342
298	508	mmu-miR-467b-5p_L-1R+1	43.844	32.0523	30.8154	29.7234	35.2918	22.6074	0	0	2		1.21785	1.21785	0.877394	0.314907	0.284342	0.501818	0.284342
300	512	mmu-miR-467b-5p_L-1R+1	43.844	32.0523	30.8154	29.7234	35.2918	22.6074	0	0	2		1.21785	1.21785	0.877394	0.314907	0.284342	0.501818	0.284342
301	514	mmu-miR-467b-5p_L-1R+1	43.844	32.0523	30.8154	29.7234	35.2918	22.6074	0	0	2		1.21785	1.21785	0.877394	0.314907	0.284342	0.501818	0.284342
74	77	bta-miR-378_R+1_1ss22CA	191.817	251.562	323.971	419.038	233.097	282.308	0	0	2		0.821184	-1.21775	0.641154	0.455537	-0.284223	0.341477	0.284223
10	8	mdo-miR-26-5p_R+2	16032.3	18397	13803.1	17686.1	22903.2	18105.7	0	0	2		0.821747	-1.21692	0.771603	0.177761	-0.283235	0.750163	0.283235
327	555	mmu-miR-532-5p	5876.92	4613.59	4911.92	7512.75	6489.1	4722.87	0	0	2		0.822572	-1.2157	0.359198	0.285748	-0.281787	0.544017	0.281787
351	592	mmu-miR-669a-5p	70.7898	32.5379	76.9021	42.8184	39.8719	65.7326	0	0	2		1.2143	1.2143	0.514857	0.546398	0.280124	0.262491	0.280124
355	597	mmu-miR-669a-5p	70.7898	32.5379	76.9021	42.8184	39.8719	65.7326	0	0	2		1.2143	1.2143	0.514857	0.546398	0.280124	0.262491	0.280124
358	602	mmu-miR-669a-5p	70.7898	32.5379	76.9021	42.8184	39.8719	65.7326	0	0	2		1.2143	1.2143	0.514857	0.546398	0.280124	0.262491	0.280124
362	608	mmu-miR-669a-5p	70.7898	32.5379	76.9021	42.8184	39.8719	65.7326	0	0	2		1.2143	1.2143	0.514857	0.546398	0.280124	0.262491	0.280124
36	62	mmu-miR-21a-5p	1.10213e+06	1.06488e+06	1.04727e+06	1.00843e+06	736290	903025	0	0	2		1.21397	1.21397	0.0800014	0.0797589	0.279737	1.09822	0.279737
14	23	mmu-miR-7a-5p_R+1	2958.56	1231.58	1571.86	2709.2	1847.6	2429.45	0	0	2		0.824763	-1.21247	0.37511	0.524506	-0.277948	0.280249	0.277948
17	27	mmu-miR-7a-5p_R+1	2958.56	1231.58	1571.86	2709.2	1847.6	2429.45	0	0	2		0.824763	-1.21247	0.37511	0.524506	-0.277948	0.280249	0.277948
386	642	mmu-miR-701-5p	18.2683	15.5405	5.45405	16.6285	8.17885	7.59914	0	0	2		1.21157	1.21157	0.71845	0.663203	0.276883	0.178353	0.276883
26	45	mmu-miR-16-5p	26766.8	21532.3	14957.7	13423.3	20754.8	18041.1	0	0	2		1.21137	1.21137	0.563649	0.413049	0.276639	0.383999	0.276639
27	47	mmu-miR-16-5p	26766.8	21532.3	14957.7	13423.3	20754.8	18041.1	0	0	2		1.21137	1.21137	0.563649	0.413049	0.276639	0.383999	0.276639
38	66	mmu-miR-23a-5p	133.359	90.3291	154.895	87.2996	85.878	139.824	0	0	2		1.20952	1.20952	0.93311	0.44757	0.274439	0.349139	0.274439
429	697	mmu-miR-1191a_R+1	27.4025	16.5118	26.1794	26.6056	13.9041	17.478	0	0	2		1.20877	1.20877	0.906902	0.474305	0.273539	0.323942	0.273539
6	9	mmu-let-7b-5p	57920.6	78312.6	121585	80834.2	90171.6	140313	0	0	2		0.828149	-1.20751	0.983782	0.535389	-0.272038	0.27133	0.272038
206	355	mmu-miR-331-3p	5305.12	6273.5	11652	6840.13	5165.76	7233.62	0	0	2		1.20745	1.20745	0.186973	0.556032	0.271958	0.2549	0.271958
39	40	aca-miR-181a_R+3	177.203	157.348	303.245	187.902	242.912	338.162	0	0	2		0.829409	-1.20568	0.959991	0.52802	-0.269844	0.27735	0.269844
242	415	mmu-miR-379-5p	11145.5	23908.1	11708.8	19822	18548	17924.1	0	0	2		0.830679	-1.20383	0.0353503	0.526003	-0.267636	0.279012	0.267636
8	8	mdo-miR-22-3p_1ss21GC	12.7878	19.4256	0	0	13.0862	13.6785	1	1	0	9.82968	1.20358	1.20358	0.760243	0.814289	0.267336	0.0892216	0.267336
235	406	mmu-miR-376b-3p	224.7	409.881	205.072	133.859	278.081	285.728	0	0	2		1.20351	1.20351	0.728725	0.594036	0.267253	0.226188	0.267253
372	624	mmu-miR-679-5p_L+2	158.934	166.089	166.894	212.013	138.223	240.893	0	0	2		0.832167	-1.20168	0.0136035	0.392425	-0.265056	0.406243	0.265056
73	134	mmu-miR-99b-3p_R+1	1065.04	1168.45	1584.95	2110.99	1197.38	1278.18	0	0	2		0.832531	-1.20116	0.456922	0.484157	-0.264424	0.315014	0.264424
162	279	mmu-miR-210-5p	248.449	270.016	529.043	478.9	153.762	240.133	0	0	2		1.20018	1.20018	0.924508	0.683197	0.263246	0.165454	0.263246
634	954	mmu-miR-8114	730.733	666.299	1107.17	773.225	471.92	841.985	0	0	2		1.19983	1.19983	0.811822	0.479274	0.262832	0.319416	0.262832
510	810	mmu-mir-3964-p3_1ss6GA	17.3549	4.85641	0	5.81997	14.7219	6.07931	1	0	1		0.834346	-1.19854	0.485064	0.816713	-0.261282	0.0879304	0.261282
6	10	mmu-let-7b-3p_1ss22CT	202.778	125.295	195.255	117.231	164.395	155.022	0	0	2		1.19851	1.19851	0.509082	0.369107	0.261246	0.432847	0.261246
80	82	bta-miR-432	0	4.85641	0	5.81997	0	0	2	2	0	1.7794	0.834438	-1.19841	0.820954	0.90498	-0.261123	0.0433609	0.261123
389	647	mmu-miR-704	31.0562	30.1097	14.1805	34.9198	20.4471	7.59914	0	0	2		1.19662	1.19662	0.64976	0.689564	0.258963	0.161425	0.258963
58	105	mmu-miR-30d-5p_R+2	82885.2	81745.4	81637.3	114984	104948	74745.2	0	0	2		0.83572	-1.19657	0.00217684	0.313664	-0.258909	0.503535	0.258909
16	15	gga-miR-30b-5p_R+1	356.232	354.518	272.703	123.051	348.419	351.08	0	0	2		1.19561	1.19561	0.234806	0.541415	0.257751	0.26647	0.257751
143	251	mmu-miR-193a-5p	361.713	421.536	284.701	420.701	374.592	478.746	0	0	2		0.83824	-1.19298	0.733273	0.23958	-0.254564	0.620549	0.254564
19	31	mmu-miR-9-5p	52.3692	83.2064	30.5427	56.5369	105.235	36.2226	0	0	2		0.839007	-1.19189	0.715176	0.69882	-0.253246	0.155635	0.253246
20	33	mmu-miR-9-5p	52.3692	83.2064	30.5427	56.5369	105.235	36.2226	0	0	2		0.839007	-1.19189	0.715176	0.69882	-0.253246	0.155635	0.253246
21	35	mmu-miR-9-5p	52.3692	83.2064	30.5427	56.5369	105.235	36.2226	0	0	2		0.839007	-1.19189	0.715176	0.69882	-0.253246	0.155635	0.253246
319	542	mmu-miR-499-5p	21.922	18.4543	11.9989	16.6285	21.265	6.07931	0	0	2		1.19108	1.19108	0.590297	0.628392	0.252273	0.201769	0.252273
45	81	mmu-miR-26a-2-3p	38.3635	17.4831	55.6313	10.8085	45.8016	37.2358	0	0	2		1.18788	1.18788	0.95385	0.719548	0.248392	0.14294	0.248392
529	832	mmu-miR-5132-3p_R+1	10.961	6.79897	29.4519	12.4714	14.7219	28.8767	0	0	2		0.842015	-1.18763	0.704644	0.750026	-0.248081	0.124924	0.248081
193	331	mmu-miR-301b-5p	0	4.85641	0	0	4.08943	0	2	2	0	1.49097	1.18755	1.18755	0.82978	0.90967	0.24799	0.041116	0.24799
357	600	mmu-miR-669o-5p	47.4976	24.282	40.36	31.5941	38.4406	63.0729	0	0	2		0.842474	-1.18698	0.68065	0.584536	-0.247297	0.233189	0.247297
51	50	bta-miR-199c_L-1R+4_1	5132.49	7102.98	3930.19	4171.26	7679.94	7306.95	0	0	2		0.8438	-1.18511	0.817195	0.528447	-0.245027	0.276998	0.245027
52	50	bta-miR-199c_L-1R+4_1	5132.49	7102.98	3930.19	4171.26	7679.94	7306.95	0	0	2		0.8438	-1.18511	0.817195	0.528447	-0.245027	0.276998	0.245027
53	51	bta-miR-199c_L-1R+4_2	5132.49	7102.98	3930.19	4171.26	7679.94	7306.95	0	0	2		0.8438	-1.18511	0.817195	0.528447	-0.245027	0.276998	0.245027
320	544	mmu-miR-500-3p_R-1	734.387	782.853	1223.89	914.567	1392.86	940.774	0	0	2		0.843892	-1.18499	0.996963	0.484952	-0.24487	0.314301	0.24487
232	400	mmu-miR-374c-5p_L+2R-1	1024.85	995.563	841.015	603.614	1254.64	558.537	0	0	2		1.18398	1.18398	0.12083	0.557688	0.243646	0.253608	0.243646
135	238	mmu-miR-185-3p	332.484	387.541	556.313	467.261	251.909	359.439	0	0	2		1.18332	1.18332	0.920291	0.511804	0.242839	0.290897	0.242839
43	42	cpo-miR-154-5p_R+1	0	19.4256	19.6346	0	30.2618	15.9582	1	1	0	14.2134	0.845094	-1.1833	0.71369	0.837382	-0.242816	0.0770766	0.242816
55	99	mmu-miR-30c-5p_R+1	6242.29	6266.22	5713.12	3955.5	4903.63	6599.47	0	0	2		1.17874	1.17874	0.103333	0.310661	0.237241	0.507713	0.237241
56	101	mmu-miR-30c-5p_R+1	6242.29	6266.22	5713.12	3955.5	4903.63	6599.47	0	0	2		1.17874	1.17874	0.103333	0.310661	0.237241	0.507713	0.237241
19	18	mdo-miR-34d-5p_L-1R+1	10.961	19.4256	20.7254	19.9542	9.81463	13.6785	0	0	2		1.17641	1.17641	0.964525	0.580523	0.234397	0.236181	0.234397
18	29	mmu-let-7a-5p	40211.9	40693.3	24059.4	44058.1	38440.2	40828.1	0	0	2		0.851113	-1.17493	0.162915	0.343634	-0.232578	0.463904	0.232578
22	38	mmu-miR-10a-3p_R-1	305.081	198.141	191.983	210.35	247.001	134.505	0	0	2		1.17462	1.17462	0.897449	0.524389	0.232191	0.280347	0.232191
63	115	mmu-miR-34c-5p	78920.1	84368.9	52630.5	52196	60731.7	70972.6	0	0	2		1.17411	1.17411	0.469608	0.394627	0.23157	0.403813	0.23157
58	106	mmu-miR-30d-3p	107.783	82.5589	65.4486	87.2996	74.4276	56.2336	0	0	2		1.17356	1.17356	0.698918	0.454622	0.230895	0.342349	0.230895
131	134	hsa-miR-578	16.4415	12.6267	9.81729	11.6399	13.9041	7.59914	0	0	2		1.17326	1.17326	0.959858	0.511847	0.23052	0.29086	0.23052
203	348	mmu-mir-328-p5	0	5.82769	23.9978	5.81997	19.6293	0	1	1	0	9.21246	1.17196	1.17196	0.786994	0.882698	0.228925	0.0541878	0.228925
206	210	gmo-miR-11202-5p_R+1_1ss7TC	91.3416	186.972	342.514	341.3	219.193	166.421	0	0	2		0.854059	-1.17088	0.667258	0.713411	-0.227592	0.14666	0.227592
224	385	mmu-miR-351-5p_R-1	2765.82	5004.04	3064.09	4342.53	4804.26	3527.52	0	0	2		0.854796	-1.16987	0.441092	0.483258	-0.226348	0.315821	0.226348
257	441	mmu-miR-433-5p	98.649	154.434	88.3556	124.714	140.676	133.745	0	0	2		0.855446	-1.16898	0.0964819	0.4124	-0.225251	0.384681	0.225251
414	678	mmu-miR-873a-3p_R+1	18.2683	0	9.81729	19.1228	4.90731	0	1	1	0	8.68595	1.16877	1.16877	0.917402	0.87072	0.22499	0.0601216	0.22499
205	353	mmu-miR-330-3p_L-1	1344.55	1834.75	2471.78	2229.88	1122.14	1483.35	0	0	2		1.1687	1.1687	0.999512	0.587318	0.224899	0.231127	0.224899
80	78	rno-miR-876	10.961	7.77025	0	4.98855	5.7252	5.3194	1	0	1		1.16828	1.16828	0.00852968	0.808445	0.224389	0.0923497	0.224389
200	344	mmu-miR-325-3p	0	4.85641	0	4.15712	0	0	2	2	0	1.50225	1.16821	1.16821	0.845765	0.918163	0.224304	0.0370803	0.224304
408	669	mmu-miR-764-3p	0	5.82769	0	4.98855	0	0	2	2	0	1.80271	1.16821	1.16821	0.845765	0.918163	0.224304	0.0370803	0.224304
212	167	efu-miR-9226_L-4_1ss22GT	0	2.4282	0	2.07856	0	0	2	2	0	0.751127	1.16821	1.16821	0.845765	0.918163	0.224304	0.0370803	0.224304
190	326	mmu-miR-299b-3p	0	2.91384	0	2.49427	0	0	2	2	0	0.901353	1.16821	1.16821	0.845765	0.918163	0.224304	0.0370803	0.224304
320	543	mmu-miR-500-5p	20.0952	4.85641	16.3622	5.81997	19.6293	22.7974	0	0	2		0.856302	-1.16781	0.872703	0.755936	-0.223808	0.121515	0.223808
14	11	ssc-miR-30a-5p_R+2	42.0171	24.282	28.3611	28.2684	27.3992	25.4571	0	0	2		1.16685	1.16685	0.0468997	0.489716	0.222617	0.310055	0.222617
41	40	cja-miR-151_R+2	0	5.34205	4.36324	7.89853	0	3.41961	1	1	0	3.50391	0.857498	-1.16618	0.680336	0.857859	-0.221795	0.066584	0.221795
28	49	mmu-miR-17-5p	11266.1	5986.98	8125.45	8298.45	5812.71	7654.62	0	0	2		1.16598	1.16598	0.381936	0.518838	0.221545	0.284969	0.221545
72	131	mmu-miR-99a-5p	112657	128034	78381.3	112292	156239	103469	0	0	2		0.857722	-1.16588	0.894221	0.466542	-0.221418	0.331109	0.221418
74	135	mmu-miR-100-5p_1ss16AT	112657	128034	78381.3	112292	156239	103469	0	0	2		0.857722	-1.16588	0.894221	0.466542	-0.221418	0.331109	0.221418
121	214	mmu-miR-151-5p	18675.7	18820	12602.7	25858	17138.5	15316.2	0	0	2		0.859134	-1.16396	0.568025	0.515668	-0.219045	0.28763	0.219045
78	140	mmu-miR-103-2-5p_R+1	15.5281	5.34205	10.9081	10.3928	15.9488	10.6388	0	0	2		0.859327	-1.1637	0.549475	0.642364	-0.218721	0.192219	0.218721
82	147	mmu-miR-107-5p_R+1_1ss16TC	15.5281	5.34205	10.9081	10.3928	15.9488	10.6388	0	0	2		0.859327	-1.1637	0.549475	0.642364	-0.218721	0.192219	0.218721
282	218	ggo-let-7i-p5_1ss2GC	14.6147	17.9687	65.994	29.0999	29.8528	25.8371	0	0	2		1.16261	1.16261	0.0109687	0.808087	0.217367	0.0925417	0.217367
5	7	mmu-let-7i-5p	174852	195597	129017	298966	154626	126683	0	0	2		0.86074	-1.16179	0.239069	0.660565	-0.216351	0.180085	0.216351
13	22	mmu-let-7g-3p_L-1R+1	0	15.5405	42.5416	18.2913	18.8114	12.9185	1	0	1		1.16115	1.16115	0.0449071	0.849776	0.215553	0.0706956	0.215553
163	126	hsa-miR-4286_R+4_1	10.961	27.1959	48.5411	28.2684	22.0829	24.3173	0	0	2		1.1611	1.1611	0.0537501	0.734629	0.215496	0.133932	0.215496
164	126	hsa-miR-4286_R+4_1	10.961	27.1959	48.5411	28.2684	22.0829	24.3173	0	0	2		1.1611	1.1611	0.0537501	0.734629	0.215496	0.133932	0.215496
165	127	hsa-miR-4286_R+4_3	10.961	27.1959	48.5411	28.2684	22.0829	24.3173	0	0	2		1.1611	1.1611	0.0537501	0.734629	0.215496	0.133932	0.215496
166	127	hsa-miR-4286_R+4_3	10.961	27.1959	48.5411	28.2684	22.0829	24.3173	0	0	2		1.1611	1.1611	0.0537501	0.734629	0.215496	0.133932	0.215496
169	129	hsa-miR-4286_R+4_2	10.961	27.1959	48.5411	28.2684	22.0829	24.3173	0	0	2		1.1611	1.1611	0.0537501	0.734629	0.215496	0.133932	0.215496
170	129	hsa-miR-4286_R+4_2	10.961	27.1959	48.5411	28.2684	22.0829	24.3173	0	0	2		1.1611	1.1611	0.0537501	0.734629	0.215496	0.133932	0.215496
490	783	mmu-miR-3102-5p.2-5p_R-1	144.32	222.423	267.249	219.496	132.497	194.538	0	0	2		1.16003	1.16003	0.682934	0.546087	0.214159	0.262738	0.214159
68	66	hsa-miR-320b_R-2_1ss20CT	40.1903	72.8461	112.353	54.0426	50.7089	89.6699	0	0	2		1.15929	1.15929	0.52635	0.692889	0.213236	0.159336	0.213236
101	181	mmu-miR-135a-5p	13.7012	12.6267	24.5432	15.3814	16.3577	12.1586	0	0	2		1.15886	1.15886	0.200025	0.593364	0.212702	0.226679	0.212702
102	182	mmu-miR-135a-5p	13.7012	12.6267	24.5432	15.3814	16.3577	12.1586	0	0	2		1.15886	1.15886	0.200025	0.593364	0.212702	0.226679	0.212702
90	161	mmu-miR-128-1-5p_R+2	60.2855	55.363	31.6335	54.874	32.7154	39.5155	0	0	2		1.15874	1.15874	0.708841	0.574245	0.212561	0.240903	0.212561
121	94	cgr-miR-1260_1ss9GA	415.604	221.938	485.411	417.791	251.5	300.546	0	0	2		1.15788	1.15788	0.563033	0.612247	0.211484	0.213073	0.211484
125	98	hsa-miR-1260b_R-1	415.604	221.938	485.411	417.791	251.5	300.546	0	0	2		1.15788	1.15788	0.563033	0.612247	0.211484	0.213073	0.211484
5	3	pma-miR-20a-5p	9.13416	0	0	0	4.08943	3.79957	2	1	0	2.83719	1.15784	1.15784	0.315422	0.906473	0.21143	0.0426451	0.21143
52	93	mmu-miR-29b-1-5p_R+2	71.2465	43.7077	47.9957	37.4141	62.1593	88.91	0	0	2		0.864531	-1.1567	0.497393	0.645819	-0.21001	0.189889	0.21001
490	784	mmu-mir-3102-p3	3781.54	5108.94	8436.33	4239.43	3880.87	6870.38	0	0	2		1.15584	1.15584	0.633324	0.666143	0.20894	0.176432	0.20894
3	2	cpo-miR-16a-5p_R-1_1ss21TA	145.233	145.692	54.5405	107.254	184.024	107.908	0	0	2		0.865426	-1.1555	0.828284	0.674544	-0.208517	0.17099	0.208517
4	2	cpo-miR-16a-5p_R-1_1ss21TA	145.233	145.692	54.5405	107.254	184.024	107.908	0	0	2		0.865426	-1.1555	0.828284	0.674544	-0.208517	0.17099	0.208517
253	435	mmu-miR-423-3p	15502.5	17433.5	24773.4	24165.4	10505.7	15326.7	0	0	2		1.15424	1.15424	0.665362	0.627328	0.206942	0.202505	0.206942
67	124	mmu-miR-92a-3p_R+1	13859.3	8465.2	14374.2	16699.6	14767.7	10793.8	0	0	2		0.868377	-1.15157	0.916794	0.510189	-0.203606	0.292269	0.203606
68	125	mmu-miR-92a-3p_R+1	13859.3	8465.2	14374.2	16699.6	14767.7	10793.8	0	0	2		0.868377	-1.15157	0.916794	0.510189	-0.203606	0.292269	0.203606
39	69	mmu-miR-23b-3p	47712.3	32732.7	33770.4	32492.9	54478.1	44236.9	0	0	2		0.870491	-1.14878	0.732712	0.516974	-0.200098	0.286532	0.200098
307	522	mmu-miR-485-5p_R+1	611.989	1402.53	1209.71	1088.33	1098.42	1515.27	0	0	2		0.870936	-1.14819	0.517814	0.595391	-0.199361	0.225197	0.199361
98	77	bta-mir-1246-p3_1ss21GA	0	0	3.81784	3.3257	0	0	2	2	0	1.19059	1.14798	1.14798	0.862865	0.927244	0.199098	0.0328059	0.199098
253	198	pal-miR-9993b-3p_L+1	7.30733	5.82769	2.72703	5.81997	5.7252	2.27974	0	0	2		1.14735	1.14735	0.853674	0.722619	0.198308	0.141091	0.198308
254	198	pal-miR-9993b-3p_L+1	7.30733	5.82769	2.72703	5.81997	5.7252	2.27974	0	0	2		1.14735	1.14735	0.853674	0.722619	0.198308	0.141091	0.198308
351	593	mmu-miR-669a-3p	129.705	69.2847	340.333	124.714	136.314	356.146	0	0	2		0.873858	-1.14435	0.912933	0.827282	-0.19453	0.0823463	0.19453
357	601	mmu-miR-669a-3p	129.705	69.2847	340.333	124.714	136.314	356.146	0	0	2		0.873858	-1.14435	0.912933	0.827282	-0.19453	0.0823463	0.19453
358	603	mmu-miR-669a-3p	129.705	69.2847	340.333	124.714	136.314	356.146	0	0	2		0.873858	-1.14435	0.912933	0.827282	-0.19453	0.0823463	0.19453
28	50	mmu-miR-17-3p_R+1	655.833	418.622	855.195	665.971	560.252	460.508	0	0	2		1.14402	1.14402	0.361996	0.592569	0.19411	0.227261	0.19411
213	368	mmu-miR-342-5p_R+1	319.696	250.591	415.599	366.658	203.653	291.807	0	0	2		1.14356	1.14356	0.984517	0.572148	0.193533	0.242492	0.193533
31	25	aca-miR-148a-3p_R+2	221.047	191.342	99.2637	160.465	146.402	140.584	0	0	2		1.14348	1.14348	0.0505156	0.595265	0.193437	0.225289	0.193437
485	777	mmu-miR-3084-5p	14.6147	12.6267	9.81729	6.6514	9.81463	15.9582	0	0	2		1.14293	1.14293	0.411988	0.640871	0.192737	0.193229	0.192737
541	848	mmu-miR-6516-5p_R+2	34.7098	35.9374	39.2692	59.0311	27.8081	38.7556	0	0	2		0.875166	-1.14264	0.0433926	0.626775	-0.192371	0.202888	0.192371
195	199	hsa-miR-4286_R+1	1879.81	1471.49	3053.18	1836.62	1920.4	1848.11	0	0	2		1.14261	1.14261	0.00610009	0.630849	0.192335	0.200075	0.192335
38	39	mdo-miR-152-3p_R+3	38.3635	53.4205	27.2703	46.5598	48.2552	41.0354	0	0	2		0.876363	-1.14108	0.152834	0.516879	-0.1904	0.286611	0.1904
196	152	oni-miR-7550_L-1R+4	9.13416	24.282	50.1773	50.3012	24.9455	20.1377	0	0	2		0.876385	-1.14105	0.757548	0.808763	-0.190363	0.0921789	0.190363
201	205	hsa-miR-7977_1ss6AG	1381.09	996.534	867.194	1121.59	961.015	761.434	0	0	2		1.14092	1.14092	0.626037	0.512744	0.190194	0.2901	0.190194
118	209	mmu-miR-148a-5p	182.683	120.439	158.167	112.242	182.388	110.188	0	0	2		1.1395	1.1395	0.735676	0.562506	0.188398	0.249873	0.188398
13	21	mmu-let-7g-5p	147370	144294	84041	182138	136265	109265	0	0	2		0.878497	-1.13831	0.968776	0.590119	-0.18689	0.229061	0.18689
267	456	mmu-miR-455-5p_R+1	115.09	227.28	101.445	63.1883	177.481	149.703	0	0	2		1.1369	1.1369	0.854032	0.752181	0.185109	0.123678	0.185109
306	521	mmu-miR-484	26092.6	20209.4	32178.9	37591.2	26915	24707.1	0	0	2		0.879701	-1.13675	0.86007	0.534442	-0.184915	0.2721	0.184915
64	117	mmu-miR-34b-5p	210.999	210.282	141.805	64.8511	147.628	283.068	0	0	2		1.13629	1.13629	0.230336	0.755884	0.184334	0.121545	0.184334
279	476	mmu-mir-466d-p3_1ss22AT	126.965	91.3004	273.91	148.736	110.473	299.705	0	0	2		0.880593	-1.1356	0.966863	0.795658	-0.183452	0.0992733	0.183452
174	299	mmu-miR-221-5p	1370.12	964.482	680.666	968.609	1334.79	1118.59	0	0	2		0.881145	-1.13489	0.440201	0.581779	-0.182548	0.235242	0.182548
193	193	PC-3p-37770_25	12.7878	6.79897	15.2713	9.97709	13.9041	6.83923	0	0	2		1.13469	1.13469	0.795568	0.692263	0.1823	0.159729	0.1823
244	420	mmu-miR-381-3p	412.864	514.779	433.052	370.815	448.201	382.237	0	0	2		1.13273	1.13273	0.749384	0.24868	0.179803	0.604359	0.179803
206	354	mmu-miR-331-5p_R-1	94.9953	144.721	207.254	200.373	155.398	150.463	0	0	2		0.882931	-1.13259	0.385845	0.6138	-0.179628	0.211973	0.179628
44	43	mdo-miR-181a-5p_R+3	513.34	381.713	860.104	443.565	379.499	728.378	0	0	2		1.13131	1.13131	0.721838	0.722937	0.177991	0.1409	0.177991
45	43	mdo-miR-181a-5p_R+3	513.34	381.713	860.104	443.565	379.499	728.378	0	0	2		1.13131	1.13131	0.721838	0.722937	0.177991	0.1409	0.177991
478	765	mmu-miR-3068-5p_R-1	975.529	809.077	814.835	649.342	763.905	886.06	0	0	2		1.13053	1.13053	0.778267	0.316407	0.177002	0.499755	0.177002
285	221	gga-let-7d_R+1	10.961	4.85641	5.45405	9.97709	4.90731	9.11897	0	0	2		0.886186	-1.12843	0.787985	0.733687	-0.174319	0.134489	0.174319
130	133	ggo-miR-577_L-1	0	6.79897	6.54486	4.98855	0	6.83923	1	1	0	4.19527	1.12818	1.12818	0.9145	0.875242	0.173994	0.0578718	0.173994
42	75	mmu-miR-25-3p	7360.31	5471.23	5745.3	7942.6	7587.52	5396.15	0	0	2		0.887728	-1.12647	0.707857	0.473439	-0.171811	0.324736	0.171811
214	214	PC-5p-66767_7	0	0	6.54486	5.81997	0	0	2	2	0	2.06081	1.12455	1.12455	0.883151	0.938014	0.169351	0.0277909	0.169351
160	277	mmu-miR-206-3p	1094.27	596.367	1404.96	1208.06	511.996	1032.72	0	0	2		1.12454	1.12454	0.881286	0.735032	0.169331	0.133694	0.169331
252	433	mmu-miR-421-3p	533.435	413.766	389.419	716.688	336.151	449.869	0	0	2		0.889474	-1.12426	0.269508	0.67163	-0.168975	0.17287	0.168975
308	525	mmu-miR-486a-3p_R+1	0	3.88512	7.63567	4.15712	6.13414	2.6597	1	0	1		0.889571	-1.12414	0.344842	0.853623	-0.168819	0.0687337	0.168819
309	527	mmu-miR-486b-3p_R+2	0	3.88512	7.63567	4.15712	6.13414	2.6597	1	0	1		0.889571	-1.12414	0.344842	0.853623	-0.168819	0.0687337	0.168819
24	41	mmu-miR-15a-5p	2002.21	2065.91	1683.12	1350.23	1822.25	1946.9	0	0	2		1.12343	1.12343	0.596176	0.386494	0.167904	0.412857	0.167904
144	254	mmu-miR-193b-3p	2959.47	3483.99	5959.1	2570.76	3959.38	4510.09	0	0	2		1.1234	1.1234	0.56027	0.698387	0.167866	0.155904	0.167866
11	11	xla-miR-25-3p_L+2	9.13416	5.82769	0	4.98855	0	8.35906	1	1	0	4.71824	1.12094	1.12094	0.905276	0.888694	0.164708	0.0512479	0.164708
187	143	hsa-mir-4454-p3	38.3635	36.423	73.0843	53.6269	80.1528	31.9164	0	0	2		0.892422	-1.12055	0.843376	0.7622	-0.164202	0.117931	0.164202
364	610	mmu-miR-671-5p_R+1	389.115	440.962	761.386	538.763	447.383	797.15	0	0	2		0.892427	-1.12054	0.894666	0.703935	-0.164193	0.152467	0.164193
281	479	mmu-miR-466b-5p	0	0.809401	3.05427	1.8707	0.817885	0.759914	1	0	1		1.12039	1.12039	0.270099	0.894774	0.164001	0.0482866	0.164001
284	484	mmu-miR-466b-5p	0	0.809401	3.05427	1.8707	0.817885	0.759914	1	0	1		1.12039	1.12039	0.270099	0.894774	0.164001	0.0482866	0.164001
287	489	mmu-miR-466b-5p	0	0.809401	3.05427	1.8707	0.817885	0.759914	1	0	1		1.12039	1.12039	0.270099	0.894774	0.164001	0.0482866	0.164001
290	495	mmu-miR-466b-5p	0	0.809401	3.05427	1.8707	0.817885	0.759914	1	0	1		1.12039	1.12039	0.270099	0.894774	0.164001	0.0482866	0.164001
291	496	mmu-miR-466b-5p	0	0.809401	3.05427	1.8707	0.817885	0.759914	1	0	1		1.12039	1.12039	0.270099	0.894774	0.164001	0.0482866	0.164001
122	216	mmu-miR-152-5p	264.891	207.854	170.166	250.259	238.823	231.014	0	0	2		0.892814	-1.12005	0.0791261	0.411618	-0.163568	0.385506	0.163568
197	339	mmu-miR-322-3p_R-1	1730.01	3007.09	1083.17	1672.83	2244.28	1280.46	0	0	2		1.11981	1.11981	0.393693	0.758584	0.163252	0.119996	0.163252
60	109	mmu-miR-31-5p_R+1	6286.13	6238.54	7636.76	6829.32	7740.47	8000.38	0	0	2		0.893278	-1.11947	0.750044	0.23833	-0.162819	0.622821	0.162819
46	82	mmu-miR-27b-5p	1748.28	1162.62	908.645	1879.02	1210.47	1183.95	0	0	2		0.893788	-1.11883	0.911076	0.676646	-0.161995	0.169639	0.161995
20	19	mdo-miR-34b-5p_1ss23TA	563.578	1062.1	748.296	525.876	915.623	1212.06	0	0	2		0.894635	-1.11777	0.69817	0.724342	-0.160629	0.140056	0.160629
189	324	mmu-miR-299a-3p	341.618	584.711	527.952	536.269	622.411	465.827	0	0	2		0.895214	-1.11705	0.551016	0.546601	-0.159696	0.26233	0.159696
324	550	mmu-miR-505-5p	45.6708	48.5641	46.9048	58.1997	51.5268	47.8746	0	0	2		0.89555	-1.11663	0.142802	0.155156	-0.159154	0.80923	0.159154
48	51	ola-miR-199a-3p_L+2R-1	75.8135	109.269	55.0859	54.874	129.635	83.5906	0	0	2		0.895819	-1.1163	0.688971	0.746642	-0.158721	0.126888	0.158721
97	175	mmu-miR-133a-3p_L-1R+1	21.0086	17.9687	93.8097	23.6956	62.9772	32.2964	0	0	2		1.11615	1.11615	0.375688	0.875144	0.158526	0.0579207	0.158526
98	177	mmu-miR-133a-3p_L-1R+1	21.0086	17.9687	93.8097	23.6956	62.9772	32.2964	0	0	2		1.11615	1.11615	0.375688	0.875144	0.158526	0.0579207	0.158526
51	42	bta-miR-378c	90.4282	66.5328	77.9929	90.2095	42.1211	78.2712	0	0	2		1.11563	1.11563	0.371075	0.638994	0.15786	0.194503	0.15786
54	44	hsa-miR-378d_R+1_1ss20AG	90.4282	66.5328	77.9929	90.2095	42.1211	78.2712	0	0	2		1.11563	1.11563	0.371075	0.638994	0.15786	0.194503	0.15786
65	120	mmu-miR-34a-3p_R+1	42.0171	14.5692	14.1805	6.6514	29.4439	27.3569	0	0	2		1.11528	1.11528	0.767896	0.845622	0.157405	0.0728237	0.157405
34	35	pma-miR-143-3p_1ss22CT	9.13416	14.5692	5.45405	12.4714	14.7219	5.3194	0	0	2		0.896801	-1.11507	0.931851	0.787402	-0.15714	0.103804	0.15714
433	703	mmu-miR-1197-3p	16.4415	23.3107	29.4519	22.4485	12.2683	27.3569	0	0	2		1.11487	1.11487	0.833939	0.703874	0.156877	0.152505	0.156877
276	470	mmu-miR-466f-5p_L-1R+1	0	0	1.36351	0	0	1.51983	2	2	0	0.480557	0.897149	-1.11464	0.891891	0.942652	-0.15658	0.0256484	0.15658
346	586	mmu-miR-667-5p	58.4586	80.6163	94.9005	93.1195	35.1691	132.225	0	0	2		0.898131	-1.11342	0.24776	0.783603	-0.155002	0.105904	0.155002
202	206	pal-miR-9226-5p_L-4_1ss15GA	31.0562	27.1959	13.0897	29.9313	22.9008	26.597	0	0	2		0.898182	-1.11336	0.242949	0.667602	-0.154921	0.175482	0.154921
139	245	mmu-miR-190a-5p_R+1	199.125	208.825	190.892	103.928	229.826	204.417	0	0	2		1.11274	1.11274	0.0357125	0.652449	0.154111	0.185454	0.154111
121	215	mmu-miR-151-3p	17618	21919.9	26444.5	28220.2	14856.9	16242.4	0	0	2		1.11232	1.11232	0.530275	0.676833	0.153574	0.169519	0.153574
260	446	mmu-miR-449c-5p_R+4	0	0	5.45405	0	4.90731	0	2	2	0	1.72689	1.11141	1.11141	0.894759	0.944174	0.152395	0.0249478	0.152395
387	645	mmu-miR-702-3p_R+2	56.6318	66.0471	137.442	61.5254	71.9739	101.069	0	0	2		1.10894	1.10894	0.35395	0.777079	0.149177	0.109535	0.149177
440	713	mmu-miR-1306-3p_R+1	69.4196	57.3056	102.536	98.1081	53.1626	55.4737	0	0	2		1.10891	1.10891	0.922344	0.725281	0.149145	0.139493	0.149145
254	436	mmu-miR-425-5p	2952.16	2096.02	2484.87	2485.13	3512.82	2346.61	0	0	2		0.90275	-1.10773	0.62327	0.574726	-0.147602	0.240539	0.147602
373	626	mmu-miR-681	9.13416	0	0	4.15712	4.08943	0	2	1	0	2.89679	1.10763	1.10763	0.338614	0.933683	0.147482	0.0298007	0.147482
348	589	mmu-mir-669m-2-p5	17.7203	13.4361	27.1612	17.4045	10.0873	25.1624	0	0	2		1.10756	1.10756	0.929149	0.766835	0.147383	0.115298	0.147383
349	590	mmu-miR-669b-5p_R+2	17.7203	13.4361	27.1612	17.4045	10.0873	25.1624	0	0	2		1.10756	1.10756	0.929149	0.766835	0.147383	0.115298	0.147383
359	604	mmu-mir-669m-1-p5	17.7203	13.4361	27.1612	17.4045	10.0873	25.1624	0	0	2		1.10756	1.10756	0.929149	0.766835	0.147383	0.115298	0.147383
239	412	mmu-miR-378a-3p_R+1	29348.4	29276.8	39467.9	44061.9	20201.4	24443.1	0	0	2		1.10582	1.10582	0.350056	0.718674	0.145113	0.143468	0.145113
132	232	mmu-miR-182-5p_R-1	575.452	131.123	220.344	227.81	244.548	367.039	0	0	2		1.10427	1.10427	0.189364	0.847911	0.14309	0.0716499	0.14309
48	87	mmu-miR-28a-3p	2740.25	2012.49	1199.89	1855.74	1383.86	2151.32	0	0	2		1.1042	1.1042	0.402997	0.725952	0.142997	0.139092	0.142997
38	67	mmu-miR-23a-3p	65869.2	46721	49853.3	47090.2	68850.8	63403.4	0	0	2		0.905763	-1.10404	0.902767	0.558007	-0.142795	0.253361	0.142795
122	217	mmu-miR-152-3p	59110.8	73986.4	40259.6	61769	51515.3	43772.6	0	0	2		1.10378	1.10378	0.443883	0.649072	0.142457	0.187707	0.142457
165	168	hsa-miR-654-5p	7.30733	2.4282	2.72703	3.74141	4.90731	2.6597	0	0	2		1.10206	1.10206	0.289052	0.832745	0.140203	0.079488	0.140203
166	169	ggo-miR-654	7.30733	2.4282	2.72703	3.74141	4.90731	2.6597	0	0	2		1.10206	1.10206	0.289052	0.832745	0.140203	0.079488	0.140203
483	774	mmu-miR-3076-3p_L+1R-2	16.4415	0	33.8151	26.6056	0	18.9979	1	1	0	15.9767	1.10204	1.10204	0.792781	0.907718	0.140171	0.0420491	0.140171
89	159	mmu-miR-127-5p_L-2R+1	336.137	762.456	681.756	489.709	694.385	774.352	0	0	2		0.909062	-1.10003	0.591774	0.722578	-0.137549	0.141116	0.137549
236	183	efu-mir-9226-p3_1ss17GT	0	2.91384	2.72703	3.74141	2.45366	0	1	1	0	1.97266	0.910542	-1.09825	0.848167	0.904512	-0.135202	0.0435857	0.135202
169	292	mmu-miR-218-1-3p	16.4415	53.4205	81.8108	39.9084	59.7056	66.8724	0	0	2		0.911021	-1.09767	0.307303	0.822097	-0.134443	0.0850771	0.134443
86	84	pal-mir-9226-p3_1ss18CT_1	80.3806	68.961	73.0843	101.434	71.9739	70.672	0	0	2		0.911284	-1.09735	0.199004	0.532715	-0.134028	0.273505	0.134028
237	184	pal-mir-9226-p5_1ss18CT	80.3806	68.961	73.0843	101.434	71.9739	70.672	0	0	2		0.911284	-1.09735	0.199004	0.532715	-0.134028	0.273505	0.134028
240	187	pal-mir-9226-p3_1ss18CT_2	80.3806	68.961	73.0843	101.434	71.9739	70.672	0	0	2		0.911284	-1.09735	0.199004	0.532715	-0.134028	0.273505	0.134028
211	211	PC-3p-59474_10	0	0	8.72648	4.15712	0	3.79957	2	1	0	2.78053	1.09675	1.09675	0.345874	0.939913	0.133231	0.0269124	0.133231
153	156	hsa-miR-630	0	4.85641	5.45405	0	4.08943	5.3194	1	1	0	3.28655	1.09583	1.09583	0.928595	0.904795	0.132022	0.04345	0.132022
127	224	mmu-miR-181a-5p	34482.4	24667.6	43727.9	35340.5	40665.3	36701.6	0	0	2		0.912787	-1.09555	0.15538	0.598054	-0.131649	0.22326	0.131649
128	226	mmu-miR-181a-5p	34482.4	24667.6	43727.9	35340.5	40665.3	36701.6	0	0	2		0.912787	-1.09555	0.15538	0.598054	-0.131649	0.22326	0.131649
84	151	mmu-miR-125b-2-3p_R-2	926.204	1449.15	797.382	998.541	1522.9	952.172	0	0	2		0.913382	-1.09483	0.914979	0.729674	-0.13071	0.136871	0.13071
117	91	hsa-miR-1260a_R+3_1ss9TA	0	6.31333	3.27243	3.74141	4.08943	2.6597	1	0	1		0.913753	-1.09439	0.105633	0.879885	-0.130124	0.0555742	0.130124
166	287	mmu-miR-216b-5p	0	0	5.45405	4.98855	0	0	2	2	0	1.74043	1.09331	1.09331	0.911022	0.952804	0.128709	0.0209963	0.128709
346	587	mmu-miR-667-3p	970.048	1235.47	1857.65	976.924	1219.47	2245.55	0	0	2		0.914729	-1.09322	0.627962	0.801263	-0.128584	0.0962249	0.128584
277	472	mmu-mir-466f-1-p3	0	0	17.6348	2.07856	0	14.0584	2	1	0	5.62862	1.09282	1.09282	0.714202	0.948974	0.128052	0.0227459	0.128052
334	567	mmu-miR-547-3p_R+1	14.6147	13.5979	0	16.6285	7.36097	6.83923	1	0	1		0.915141	-1.09273	0.625913	0.885494	-0.127934	0.0528142	0.127934
227	391	mmu-miR-363-3p	16.4415	23.3107	0	16.6285	10.6325	9.11897	1	0	1		1.0927	1.0927	0.198078	0.884859	0.127892	0.0531259	0.127892
387	644	mmu-miR-702-5p	9.13416	4.85641	0	4.15712	4.08943	4.55948	1	0	1		1.0925	1.0925	0.00616419	0.894859	0.127631	0.0482452	0.127631
94	169	mmu-miR-130b-3p	297.774	234.079	265.067	286.01	202.018	241.653	0	0	2		1.09215	1.09215	0.729851	0.502415	0.127169	0.298938	0.127169
42	74	mmu-miR-25-5p_R+1	290.466	121.41	199.618	256.079	142.312	161.862	0	0	2		1.09146	1.09146	0.681543	0.790569	0.126263	0.10206	0.126263
211	365	mmu-miR-340-3p	348.925	241.849	169.076	290.999	231.462	174.02	0	0	2		1.09098	1.09098	0.589589	0.751234	0.125631	0.124225	0.125631
108	192	mmu-miR-140-3p_L-1R+2	80335	73535.7	92973	107146	74718.7	87407.6	0	0	2		0.916708	-1.09086	0.534124	0.534724	-0.125467	0.27187	0.125467
37	38	xtr-miR-148a_R+2	78.5538	47.5928	38.1784	49.8855	76.0633	53.194	0	0	2		0.917285	-1.09017	0.62579	0.753964	-0.124559	0.12265	0.124559
173	131	bta-miR-4286_R+4	0	2.4282	6.54486	0	3.68048	4.55948	1	1	0	2.86884	1.08897	1.08897	0.696676	0.922719	0.122962	0.0349306	0.122962
174	131	bta-miR-4286_R+4	0	2.4282	6.54486	0	3.68048	4.55948	1	1	0	2.86884	1.08897	1.08897	0.696676	0.922719	0.122962	0.0349306	0.122962
147	258	mmu-miR-195a-5p_R+1	390.942	802.278	471.23	414.049	649.946	468.107	0	0	2		1.08638	1.08638	0.486294	0.77566	0.119533	0.110329	0.119533
367	616	mmu-miR-674-3p_R-2	1560.11	1505.49	2236.16	2397	1611.23	1748.56	0	0	2		0.920957	-1.08583	0.969357	0.676434	-0.118794	0.169775	0.118794
21	20	mdo-miR-34b-5p	200.038	345.29	260.704	189.98	311.205	372.358	0	0	2		0.922715	-1.08376	0.763683	0.757854	-0.116043	0.120415	0.116043
154	157	cja-miR-631	14.6147	7.77025	7.63567	14.9656	8.17885	4.55948	0	0	2		1.08362	1.08362	0.726719	0.849767	0.115859	0.0707002	0.115859
624	941	mmu-miR-7679-5p_R+4	0	16.5118	15.2713	24.1113	4.90731	5.3194	1	0	1		0.925596	-1.08039	0.825369	0.922887	-0.111546	0.0348515	0.111546
434	704	mmu-miR-1198-5p	1289.74	1238.38	1927.46	2179.16	1126.23	1505.39	0	0	2		0.926167	-1.07972	0.682595	0.770562	-0.110655	0.113192	0.110655
196	337	mmu-miR-320-3p	14559.9	31488	38551.4	28851.3	18137.4	31379.1	0	0	2		1.07951	1.07951	0.490695	0.812383	0.110383	0.0902391	0.110383
532	837	mmu-miR-5621-3p	0	11.6554	8.72648	12.4714	5.7252	3.79957	1	0	1		0.926611	-1.0792	0.721276	0.908107	-0.109965	0.0418632	0.109965
225	176	pal-miR-9226-5p_L-4	58.4586	46.1359	53.9951	64.0197	68.7024	38.3757	0	0	2		0.926895	-1.07887	0.254848	0.700657	-0.109522	0.154494	0.109522
226	176	pal-miR-9226-5p_L-4	58.4586	46.1359	53.9951	64.0197	68.7024	38.3757	0	0	2		0.926895	-1.07887	0.254848	0.700657	-0.109522	0.154494	0.109522
110	196	mmu-miR-143-3p_R+1	349723	331159	207089	362150	246134	215160	0	0	2		1.07836	1.07836	0.999206	0.751076	0.108843	0.124316	0.108843
23	22	dre-miR-92b-3p_R+1	98.649	102.956	224.707	155.476	106.325	133.745	0	0	2		1.07778	1.07778	0.211795	0.825983	0.108062	0.083029	0.108062
238	410	mmu-miR-378d_1ss6CA	539.829	521.578	641.942	793.595	514.859	527.38	0	0	2		0.927834	-1.07778	0.290256	0.676545	-0.108062	0.169703	0.108062
26	27	dre-miR-103_R+2	138.839	179.687	122.171	182.082	141.494	151.223	0	0	2		0.928176	-1.07738	0.677913	0.617269	-0.10753	0.209525	0.10753
48	86	mmu-miR-28a-5p_R-1	3821.73	3955.06	3304.61	4902.77	2969.88	4064.53	0	0	2		0.92831	-1.07723	0.223245	0.656	-0.107322	0.183096	0.107322
449	728	mmu-miR-1943-3p	0	0	6.54486	0	0	6.07931	2	2	0	2.10403	1.07658	1.07658	0.926345	0.960934	0.106454	0.0173064	0.106454
508	808	mmu-miR-3572-3p_R+1	0	0	6.54486	0	0	6.07931	2	2	0	2.10403	1.07658	1.07658	0.926345	0.960934	0.106454	0.0173064	0.106454
116	205	mmu-miR-147-5p_R-2	18.2683	14.5692	13.0897	31.5941	4.90731	12.9185	0	0	2		0.929326	-1.07605	0.0731101	0.892064	-0.105744	0.0496038	0.105744
235	235	PC-5p-10901_150	31.0562	6.79897	52.3589	41.5712	17.9935	24.3173	0	0	2		1.07549	1.07549	0.445516	0.8944	0.104991	0.0484682	0.104991
181	310	mmu-miR-296-5p	593.721	539.061	842.105	566.2	773.72	498.504	0	0	2		1.07423	1.07423	0.881649	0.733748	0.103301	0.134453	0.103301
24	42	mmu-miR-15a-3p_1ss22AT	58.4586	32.0523	116.717	86.4681	63.7951	72.1918	0	0	2		0.931548	-1.07348	0.130877	0.854022	-0.102298	0.0685311	0.102298
186	190	hsa-miR-891a-5p	10.961	9.71281	9.81729	15.7971	6.54308	6.07931	0	0	2		1.0729	1.0729	0.031414	0.848139	0.101509	0.0715331	0.101509
8	7	dno-miR-24b-3p_R+1_1ss21GA	4788.13	4599.5	4178.35	4258.14	4342.56	5945.19	0	0	2		0.932633	-1.07223	0.194718	0.601978	-0.100619	0.220419	0.100619
9	7	dno-miR-24b-3p_R+1_1ss21GA	4788.13	4599.5	4178.35	4258.14	4342.56	5945.19	0	0	2		0.932633	-1.07223	0.194718	0.601978	-0.100619	0.220419	0.100619
86	155	mmu-miR-125b-1-3p	7511.94	6372.58	6400.87	7601.71	5142.05	6176.58	0	0	2		1.07215	1.07215	0.433629	0.602413	0.100503	0.220106	0.100503
77	80	bta-miR-424-3p	4.56708	2.4282	2.72703	3.74141	2.8626	3.79957	0	0	2		0.934516	-1.07007	0.340827	0.77254	-0.097709	0.112079	0.097709
78	80	bta-miR-424-3p	4.56708	2.4282	2.72703	3.74141	2.8626	3.79957	0	0	2		0.934516	-1.07007	0.340827	0.77254	-0.097709	0.112079	0.097709
51	49	cgr-miR-199b_2ss10TC11AG	116.004	144.235	119.989	92.2881	160.306	154.263	0	0	2		0.934552	-1.07003	0.282855	0.724368	-0.0976534	0.140041	0.0976534
52	49	cgr-miR-199b_2ss10TC11AG	116.004	144.235	119.989	92.2881	160.306	154.263	0	0	2		0.934552	-1.07003	0.282855	0.724368	-0.0976534	0.140041	0.0976534
85	153	mmu-miR-125a-3p_R-1	648.526	897.464	980.638	1005.19	606.871	749.275	0	0	2		1.07	1.07	0.845982	0.737641	0.0976082	0.132155	0.0976082
3	3	mmu-let-7f-5p	134689	135402	80535.3	165625	109252	99982.4	0	0	2		0.935355	-1.06911	0.879464	0.782833	-0.0964138	0.106331	0.0964138
10	15	mmu-let-7f-5p	134689	135402	80535.3	165625	109252	99982.4	0	0	2		0.935355	-1.06911	0.879464	0.782833	-0.0964138	0.106331	0.0964138
135	237	mmu-miR-185-5p	7155.7	8109.23	5317.7	9120.73	4966.2	5172.74	0	0	2		1.06869	1.06869	0.537257	0.794075	0.0958449	0.100138	0.0958449
42	33	cpo-miR-328-3p_R-1_1ss21GT	0	3.88512	2.72703	3.3257	2.8626	0	1	1	0	2.13341	1.06849	1.06849	0.898414	0.93183	0.0955771	0.0306632	0.0955771
69	127	mmu-miR-93-3p_R+1	202.778	134.037	114.535	148.825	166.849	166.421	0	0	2		0.936227	-1.06812	0.0938345	0.7275	-0.0950694	0.138167	0.0950694
493	787	mmu-miR-3110-5p_R+1	0	0	5.45405	5.81997	0	0	2	2	0	1.879	0.937127	-1.06709	0.935155	0.965607	-0.0936837	0.0151994	0.0936837
117	208	mmu-miR-148b-3p	7515.59	5982.12	4807.2	6819.34	7335.21	5362.71	0	0	2		0.937883	-1.06623	0.723928	0.701687	-0.0925201	0.153856	0.0925201
81	146	mmu-miR-106b-3p	1645.98	1264.61	2715.03	2633.12	1531.08	1829.87	0	0	2		0.938528	-1.0655	0.729816	0.832661	-0.0915276	0.079532	0.0915276
427	694	mmu-miR-1188-5p	51.1513	67.9897	122.171	98.9395	41.7122	85.8703	0	0	2		1.06529	1.06529	0.790083	0.866663	0.0912471	0.0621499	0.0912471
438	709	mmu-miR-1249-5p	0	4.85641	0	0	0	4.55948	2	2	0	1.56932	1.06512	1.06512	0.936995	0.966584	0.0910181	0.0147606	0.0910181
145	148	hsa-miR-604	21.922	11.6554	11.9989	19.9542	11.4504	11.3987	0	0	2		1.06478	1.06478	0.832689	0.844101	0.0905612	0.0736058	0.0905612
162	280	mmu-miR-210-3p	3741.35	4275.58	8707.94	9275.37	2483.92	3960.67	0	0	2		1.06393	1.06393	0.736254	0.903497	0.0893974	0.0440731	0.0893974
344	583	mmu-miR-665-3p_R+2	241.142	496.325	224.707	275.201	374.592	373.878	0	0	2		0.939925	-1.06392	0.247082	0.83791	-0.0893829	0.0768026	0.0893829
413	676	mmu-miR-872-3p	756.309	600.252	466.867	628.557	657.58	428.592	0	0	2		1.06339	1.06339	0.851004	0.759119	0.0886725	0.11969	0.0886725
205	352	mmu-miR-330-5p_R-1	173.549	223.395	350.15	310.121	220.011	172.501	0	0	2		1.06328	1.06328	0.741666	0.834004	0.0885181	0.0788318	0.0885181
340	577	mmu-miR-652-3p_R+1	29587.4	33448	38645.2	40608.4	38958.3	28423.8	0	0	2		0.941569	-1.06206	0.642075	0.673286	-0.0868611	0.171801	0.0868611
66	122	mmu-miR-92b-3p	489.591	626.476	892.283	765.742	704.199	661.885	0	0	2		0.94208	-1.06148	0.122159	0.752802	-0.0860792	0.123319	0.0860792
112	199	mmu-miR-145a-3p_L+2R-2	3520.31	2091.17	1366.79	2103.5	2609.87	1861.03	0	0	2		1.06143	1.06143	0.216803	0.850568	0.0860067	0.0702911	0.0860067
25	24	gmo-miR-100b-5p_R-1_2ss14AG21TC	10.961	40.7938	22.907	32.0098	22.9008	24.3173	0	0	2		0.942368	-1.06116	0.19262	0.875541	-0.0856377	0.0577237	0.0856377
443	718	mmu-miR-1843b-5p_L+1R-1	610.162	619.192	555.768	712.946	585.197	595.013	0	0	2		0.942934	-1.06052	0.37782	0.473641	-0.0847712	0.324551	0.0847712
7	11	mmu-let-7e-5p	26194.3	35673.5	28643.9	39085.2	24776	32117.2	0	0	2		0.943043	-1.0604	0.642116	0.734664	-0.0846046	0.133911	0.0846046
79	77	oga-mir-872-p5	0	17.4831	19.6346	14.9656	11.4504	12.9185	1	0	1		0.943639	-1.05973	0.0523522	0.912283	-0.0836929	0.0398704	0.0836929
318	541	mmu-miR-497a-5p	224.7	336.063	397.055	296.819	426.118	291.807	0	0	2		0.943902	-1.05943	0.862988	0.790829	-0.0832913	0.101917	0.0832913
453	732	mmu-miR-1947-5p_R-1	21.922	19.4256	20.7254	35.7512	11.4504	11.3987	0	0	2		1.05926	1.05926	0.0156808	0.899781	0.0830565	0.0458631	0.0830565
29	52	mmu-miR-18a-3p_R+1	89.5148	52.4492	112.353	78.1539	68.7024	93.4694	0	0	2		1.05822	1.05822	0.291936	0.817118	0.0816393	0.0877154	0.0816393
178	135	ssc-mir-4335-p3_1ss3CG	0	9.71281	2.72703	2.07856	2.8626	6.83923	1	0	1		1.05598	1.05598	0.412216	0.949261	0.0785806	0.0226145	0.0785806
180	137	ssc-mir-4335-p5_1ss3CG	0	9.71281	2.72703	2.07856	2.8626	6.83923	1	0	1		1.05598	1.05598	0.412216	0.949261	0.0785806	0.0226145	0.0785806
385	640	mmu-miR-700-5p	381.808	290.413	784.293	433.172	449.019	655.806	0	0	2		0.94702	-1.05594	0.365312	0.879261	-0.0785336	0.0558824	0.0785336
21	16	oni-miR-27e_R-2	89.5148	144.721	131.988	93.951	150.491	102.588	0	0	2		1.05531	1.05531	0.947805	0.8049	0.0776636	0.094258	0.0776636
199	342	mmu-miR-324-5p	1835.97	1598.73	2616.85	1481.6	1868.05	2385.37	0	0	2		1.05519	1.05519	0.840324	0.806815	0.0775062	0.0932262	0.0775062
122	126	hsa-miR-552-3p	12.7878	4.85641	0	9.14567	4.90731	4.55948	1	0	1		0.947979	-1.05488	0.270581	0.939686	-0.0770725	0.0270172	0.0770725
221	380	mmu-miR-345-5p_R-1	902.455	674.069	1053.72	783.202	907.853	803.229	0	0	2		1.05451	1.05451	0.218521	0.718036	0.0765726	0.143854	0.0765726
5	4	dre-miR-23a-3p_R+2_1ss19TA	34759.1	20263.8	22793.6	19881.9	31992.4	30180	0	0	2		0.948355	-1.05446	0.831594	0.821024	-0.076501	0.0856443	0.076501
136	239	mmu-miR-186-5p	3558.67	2239.77	2927.73	3224.26	3337.79	2638.42	0	0	2		0.948449	-1.05435	0.48912	0.736492	-0.0763586	0.132832	0.0763586
22	21	dre-miR-92a-3p_R+1	3538.57	2251.43	3786.2	4010.79	2856.87	2217.43	0	0	2		1.05406	1.05406	0.902219	0.828558	0.0759527	0.0816769	0.0759527
46	83	mmu-miR-27b-3p	247742	167039	184399	245071	224730	161529	0	0	2		0.949076	-1.05366	0.974766	0.775538	-0.0754043	0.110397	0.0754043
4	5	mmu-let-7d-5p	60499.7	62042	35436.3	66308.6	47277.3	52848	0	0	2		0.949194	-1.05353	0.60059	0.798066	-0.0752252	0.0979614	0.0752252
606	920	mmu-miR-7091-5p	9.13416	24.282	23.9978	29.0999	15.5398	9.87888	0	0	2		1.05311	1.05311	0.869767	0.904899	0.0746554	0.0434001	0.0746554
92	73	ptr-miR-877_R+3	0	0	32.7243	9.97709	8.17885	12.9185	2	0	1		1.05309	1.05309	0.0315704	0.96453	0.074632	0.0156844	0.074632
208	163	eca-mir-8969-p3_1ss14GT	22.8354	14.5692	22.3616	32.8413	21.674	8.35906	0	0	2		0.950567	-1.052	0.250863	0.897714	-0.0731395	0.0468622	0.0731395
209	164	eca-mir-8969-p5_1ss14GT	22.8354	14.5692	22.3616	32.8413	21.674	8.35906	0	0	2		0.950567	-1.052	0.250863	0.897714	-0.0731395	0.0468622	0.0731395
369	620	mmu-miR-676-3p	540.742	1250.04	824.653	689.251	920.121	883.02	0	0	2		1.04937	1.04937	0.215255	0.860045	0.0695191	0.0654787	0.0695191
595	908	mmu-miR-7062-5p	51.1513	29.1384	93.8097	81.4796	34.3512	50.1543	0	0	2		1.04889	1.04889	0.694673	0.913908	0.0688576	0.0390977	0.0688576
54	98	mmu-miR-30b-3p	655.833	363.259	475.593	601.12	511.996	454.429	0	0	2		0.95352	-1.04875	0.400971	0.811412	-0.0686649	0.0907586	0.0686649
231	399	mmu-miR-370-3p	1695.3	3425.71	3143.72	2984.81	1987.46	2913.51	0	0	2		1.04805	1.04805	0.528478	0.849678	0.0677121	0.0707455	0.0677121
154	271	mmu-miR-200b-3p	96.8221	94.2143	61.0854	149.656	39.2585	51.6742	0	0	2		1.04794	1.04794	0.195812	0.921746	0.0675496	0.0353885	0.0675496
201	346	mmu-miR-326-3p	7292.72	5358.56	14513.2	9431.68	9628.15	9340.86	0	0	2		0.956473	-1.04551	0.00185073	0.895998	-0.0642034	0.0476929	0.0642034
103	185	mmu-miR-136-3p_L+1R-1	1202.06	1847.38	1624.22	1151.52	1599.78	1723.49	0	0	2		1.04444	1.04444	0.914906	0.809113	0.0627287	0.0919908	0.0627287
37	64	mmu-miR-22-5p_R-1	1395.7	1358.82	994.819	959.464	1393.68	1237.9	0	0	2		1.04408	1.04408	0.992768	0.784291	0.0622351	0.105523	0.0622351
503	800	mmu-miR-3473h-5p	0	5.82769	5.45405	10.8085	0	0	1	2	0	3.68171	1.04378	1.04378	0.429237	0.970909	0.0618207	0.0128216	0.0618207
71	69	hsa-miR-378c_R-2_2ss21AG22GC	1574.73	1461.78	2000.55	2318.84	1404.31	1531.23	0	0	2		0.958639	-1.04315	0.494949	0.836868	-0.0609402	0.077343	0.0609402
7	12	mmu-let-7e-3p	363.54	355.489	406.872	435.666	417.939	319.164	0	0	2		0.960036	-1.04163	0.324715	0.713326	-0.0588402	0.146712	0.0588402
96	101	ggo-miR-503	10.961	10.6841	7.63567	9.97709	9.81463	8.35906	0	0	2		1.04014	1.04014	0.378169	0.766115	0.0567784	0.115706	0.0567784
69	126	mmu-miR-93-5p	12638	7786.76	13340.6	13230.5	10074.7	11809.1	0	0	2		0.961587	-1.03995	0.429055	0.830665	-0.0565105	0.0805739	0.0565105
71	129	mmu-miR-98-5p	8539.07	6452.41	4096.97	8067.06	5436.16	4886.82	0	0	2		1.03798	1.03798	0.738203	0.892377	0.0537764	0.0494514	0.0537764
235	405	mmu-miR-376b-5p_R-1	78.5538	60.2194	57.8129	21.617	116.958	65.3526	0	0	2		0.964001	-1.03734	0.106958	0.935299	-0.0528929	0.0290496	0.0528929
90	88	tch-let-7a-5p_2ss2AG19AG	54.805	65.5615	37.0875	78.9853	47.8463	36.4759	0	0	2		0.964157	-1.03718	0.598297	0.903912	-0.0526606	0.0438737	0.0526606
210	363	mmu-miR-339-3p_R-2	1602.13	1475.38	2004.91	2209.93	1724.92	1321.49	0	0	2		0.966912	-1.03422	0.557352	0.857307	-0.048543	0.0668638	0.048543
437	708	mmu-miR-1247-3p	524.301	394.34	259.613	375.804	380.317	462.028	0	0	2		0.96725	-1.03386	0.237043	0.878133	-0.0480394	0.0564397	0.0480394
149	261	mmu-miR-199b-5p_1ss10TC	36421.6	42387.7	35766.6	27469.4	45370.6	38028.1	0	0	2		1.03344	1.03344	0.282344	0.836311	0.047458	0.0776321	0.047458
150	263	mmu-miR-199a-5p	36421.6	42387.7	35766.6	27469.4	45370.6	38028.1	0	0	2		1.03344	1.03344	0.282344	0.836311	0.047458	0.0776321	0.047458
151	265	mmu-miR-199a-5p	36421.6	42387.7	35766.6	27469.4	45370.6	38028.1	0	0	2		1.03344	1.03344	0.282344	0.836311	0.047458	0.0776321	0.047458
22	37	mmu-miR-10a-5p_R-1	17442.6	16308.8	13708.8	15629.9	19270.2	14133.6	0	0	2		0.967907	-1.03316	0.688587	0.794443	-0.0470601	0.0999375	0.0470601
44	78	mmu-miR-26b-5p_R+1	34606.9	31170.4	23057.5	28218.5	35130.4	28364.6	0	0	2		0.968613	-1.0324	0.614412	0.827006	-0.0460085	0.0824911	0.0460085
50	90	mmu-miR-29a-3p_R-1	122116	107451	80763	84062.8	135479	81104.1	0	0	2		1.03221	1.03221	0.63966	0.887408	0.0457434	0.0518765	0.0457434
23	24	dre-miR-92a-3p_R+2	6993.11	4689.35	6140.17	7529.38	5326.07	4412.06	0	0	2		1.03215	1.03215	0.691351	0.879321	0.0456502	0.0558527	0.0456502
71	130	mmu-miR-98-3p	0	4.85641	5.45405	0	0	10.6388	1	2	0	3.49154	0.969137	-1.03185	0.383412	0.979193	-0.0452269	0.00913169	0.0452269
61	112	mmu-miR-32-3p	29.2293	4.85641	19.6346	10.8085	24.5366	16.7181	0	0	2		1.03183	1.03183	0.47857	0.949076	0.0452038	0.0226989	0.0452038
171	295	mmu-mir-219a-1-p5	0	2.4282	18.5438	15.7971	0	4.55948	1	1	0	6.88809	1.03023	1.03023	0.78843	0.979424	0.0429699	0.00902935	0.0429699
57	104	mmu-miR-30a-3p_1ss22CT	2177.58	2103.31	1251.16	1855.74	2010.77	1826.45	0	0	2		0.971735	-1.02909	0.0714041	0.867946	-0.0413651	0.0615072	0.0413651
59	108	mmu-miR-30e-3p_2ss18AG22CT	2177.58	2103.31	1251.16	1855.74	2010.77	1826.45	0	0	2		0.971735	-1.02909	0.0714041	0.867946	-0.0413651	0.0615072	0.0413651
57	103	mmu-miR-30a-5p_R+2	41573.2	39098.9	28381.2	37568.3	37612.5	36962.2	0	0	2		0.972449	-1.02833	0.00535602	0.823078	-0.0403057	0.0845592	0.0403057
10	10	dre-miR-24_R+2	2919.28	2882.76	2155.44	2060.27	2543.62	3136.17	0	0	2		1.02809	1.02809	0.779938	0.864476	0.0399673	0.0632472	0.0399673
350	591	mmu-miR-669d-5p	18.2683	9.22717	40.36	15.7971	11.4504	38.7556	0	0	2		1.02807	1.02807	0.912573	0.963089	0.0399318	0.0163334	0.0399318
354	596	mmu-miR-669d-5p	18.2683	9.22717	40.36	15.7971	11.4504	38.7556	0	0	2		1.02807	1.02807	0.912573	0.963089	0.0399318	0.0163334	0.0399318
40	71	mmu-miR-24-3p_R-2	84182.3	67051.9	56344.2	73775.2	73895.5	65667.2	0	0	2		0.973002	-1.02775	0.202745	0.833378	-0.0394848	0.0791579	0.0394848
41	73	mmu-miR-24-3p_R-2	84182.3	67051.9	56344.2	73775.2	73895.5	65667.2	0	0	2		0.973002	-1.02775	0.202745	0.833378	-0.0394848	0.0791579	0.0394848
335	569	mmu-miR-574-3p	10246.7	8733.76	17986.4	7209.28	10846	17914.2	0	0	2		1.02773	1.02773	0.907922	0.941448	0.0394583	0.0262038	0.0394583
404	665	mmu-miR-758-3p_R+3	52.9781	63.1333	47.9957	60.694	53.9804	53.9539	0	0	2		0.973188	-1.02755	0.404383	0.777544	-0.0392096	0.109275	0.0392096
137	140	ggo-miR-584_R+1	0	4.85641	0	4.98855	0	0	2	2	0	1.64083	0.973511	-1.02721	0.97316	0.985766	-0.0387306	0.00622618	0.0387306
249	249	PC-3p-76011_6	0	4.85641	0	4.98855	0	0	2	2	0	1.64083	0.973511	-1.02721	0.97316	0.985766	-0.0387306	0.00622618	0.0387306
626	944	mmu-miR-7688-5p	358.059	274.873	361.058	463.935	198.746	357.92	0	0	2		0.973926	-1.02677	0.236802	0.919142	-0.0381152	0.0366173	0.0381152
267	457	mmu-miR-455-3p_R+1	2252.48	6441.54	2849.2	3116.18	5035.72	3696.22	0	0	2		0.974266	-1.02641	0.317566	0.946618	-0.037613	0.0238253	0.037613
44	79	mmu-miR-26b-3p	74.9001	30.1097	40.36	55.7054	75.2455	18.2379	0	0	2		0.974401	-1.02627	0.792415	0.955676	-0.0374118	0.0196891	0.0374118
441	714	mmu-miR-1839-5p	5286.85	6057.88	4202.89	6764.47	3988.83	4396.86	0	0	2		1.02624	1.02624	0.557663	0.902818	0.0373613	0.0443996	0.0373613
257	442	mmu-miR-433-3p	4811.88	7600.27	6161.99	6523.36	5377.6	7157.63	0	0	2		0.974581	-1.02608	0.590154	0.874436	-0.0371456	0.0582719	0.0371456
95	171	mmu-miR-130a-3p	1512.62	1963.93	1140.99	1484.09	1803.44	1448.4	0	0	2		0.975001	-1.02564	0.367384	0.888132	-0.0365237	0.0515224	0.0365237
26	26	PC-3p-68927_7	0	0	5.45405	0	0	5.3194	2	2	0	1.79558	1.02531	1.02531	0.975007	0.986745	0.036065	0.00579497	0.036065
175	175	PC-3p-15946_93	0	14.5692	27.2703	23.2799	8.17885	11.3987	1	0	1		0.976247	-1.02433	0.507171	0.9721	-0.0346814	0.0122891	0.0346814
81	79	cgr-miR-1260_L-1R+2_3	0	8.74153	6.54486	5.81997	0	9.11897	1	1	0	5.03756	1.02326	1.02326	0.984776	0.976789	0.03317	0.0101993	0.03317
82	80	cgr-miR-1260_L-1R+2_5	0	8.74153	6.54486	5.81997	0	9.11897	1	1	0	5.03756	1.02326	1.02326	0.984776	0.976789	0.03317	0.0101993	0.03317
108	84	cgr-miR-1260_L-1R+2_2	0	8.74153	6.54486	5.81997	0	9.11897	1	1	0	5.03756	1.02326	1.02326	0.984776	0.976789	0.03317	0.0101993	0.03317
118	92	cgr-miR-1260_L-1R+2_6	0	8.74153	6.54486	5.81997	0	9.11897	1	1	0	5.03756	1.02326	1.02326	0.984776	0.976789	0.03317	0.0101993	0.03317
119	93	cgr-miR-1260_L-1R+2_1	0	8.74153	6.54486	5.81997	0	9.11897	1	1	0	5.03756	1.02326	1.02326	0.984776	0.976789	0.03317	0.0101993	0.03317
120	93	cgr-miR-1260_L-1R+2_1	0	8.74153	6.54486	5.81997	0	9.11897	1	1	0	5.03756	1.02326	1.02326	0.984776	0.976789	0.03317	0.0101993	0.03317
127	100	cgr-miR-1260_L-1R+2_4	0	8.74153	6.54486	5.81997	0	9.11897	1	1	0	5.03756	1.02326	1.02326	0.984776	0.976789	0.03317	0.0101993	0.03317
133	234	mmu-miR-183-5p	716.118	99.0707	251.977	355.85	301.8	385.276	0	0	2		1.02324	1.02324	0.0341282	0.969365	0.0331483	0.0135128	0.0331483
469	752	mmu-mir-1983-p5_1ss1GA	93.1685	13.5979	23.9978	39.0769	62.1593	26.597	0	0	2		1.02293	1.02293	0.29645	0.972926	0.0327048	0.0119203	0.0327048
316	538	mmu-miR-495-3p	909.763	1412.24	641.396	586.986	1130.32	1313.13	0	0	2		0.97788	-1.02262	0.964617	0.946684	-0.0322707	0.0237948	0.0322707
321	545	mmu-miR-501-5p_R-1	358.059	238.935	308.699	271.044	322.247	292.567	0	0	2		1.02239	1.02239	0.311536	0.868989	0.0319474	0.0609858	0.0319474
245	422	mmu-miR-382-3p_L+2R-2	286.813	684.753	403.6	394.095	516.904	493.184	0	0	2		0.979335	-1.0211	0.184178	0.941544	-0.0301256	0.0261595	0.0301256
323	549	mmu-miR-504-5p_L-1	179.03	187.457	93.8097	171.273	170.12	109.428	0	0	2		1.02102	1.02102	0.636071	0.934701	0.030008	0.0293271	0.030008
103	184	mmu-miR-136-5p	177.203	316.638	213.799	160.465	294.439	238.613	0	0	2		1.02036	1.02036	0.928506	0.938172	0.0290833	0.0277174	0.0290833
188	322	mmu-miR-298-5p_R-2	1616.75	1348.14	1968.91	2475.15	1199.02	1162.67	0	0	2		1.02005	1.02005	0.295646	0.948202	0.0286339	0.0230991	0.0286339
339	575	mmu-miR-615-3p	25.5757	15.5405	9.81729	5.81997	17.9935	28.1168	0	0	2		0.980804	-1.01957	0.675959	0.968553	-0.0279625	0.0138764	0.0279625
25	20	cpo-miR-106a-5p_R+2_1ss1AC	84.0343	17.4831	14.1805	36.5827	21.265	60.0332	0	0	2		0.981481	-1.01887	0.394162	0.978512	-0.0269676	0.00943392	0.0269676
230	397	mmu-miR-369-3p	184.51	339.948	173.439	145.499	280.535	259.131	0	0	2		1.01858	1.01858	0.75597	0.953334	0.0265639	0.020755	0.0265639
360	360	PC-5p-16736_87	18.2683	11.6554	14.1805	14.1342	4.90731	25.8371	0	0	2		0.982745	-1.01756	0.183826	0.969548	-0.0251109	0.0134309	0.0251109
230	396	mmu-miR-369-5p	175.376	155.405	69.8119	94.7824	177.481	135.265	0	0	2		0.982982	-1.01731	0.704463	0.956928	-0.0247637	0.0191206	0.0247637
321	546	mmu-miR-501-3p	13343.2	13496.9	12302.2	16884.6	11703.1	11191.3	0	0	2		0.983995	-1.01627	0.0816924	0.914509	-0.0232778	0.0388119	0.0232778
462	744	mmu-miR-1964-3p	171.722	143.75	196.346	234.462	101.418	167.941	0	0	2		1.01587	1.01587	0.27064	0.951636	0.0227202	0.0215293	0.0227202
236	407	mmu-miR-376c-3p	171.722	328.293	230.161	128.871	314.886	297.886	0	0	2		0.984539	-1.0157	0.743631	0.961754	-0.0224803	0.0169361	0.0224803
441	715	mmu-miR-1839-3p_R-2	73.0733	76.7312	61.0854	59.8626	75.2455	79.0311	0	0	2		0.984827	-1.01541	0.78779	0.892569	-0.0220583	0.049358	0.0220583
243	417	mmu-miR-380-5p	129.705	167.06	83.9924	107.254	122.683	145.144	0	0	2		1.01514	1.01514	0.346747	0.946331	0.0216748	0.0239571	0.0216748
9	9	pma-miR-23b_R+1_1ss23CT	2550.26	1573.48	1939.46	1362.7	2470.01	2318.5	0	0	2		0.98569	-1.01452	0.806414	0.950999	-0.0207938	0.0218199	0.0207938
445	721	mmu-miR-1930-5p	54.805	17.4831	46.9048	44.0655	39.2585	34.1961	0	0	2		1.01423	1.01423	0.118469	0.964297	0.0203901	0.0157892	0.0203901
149	262	mmu-miR-199b-3p_R-1	111662	147140	90326.4	97629.3	146569	109726	0	0	2		0.986452	-1.01373	0.882034	0.945966	-0.0196799	0.0241245	0.0196799
150	264	mmu-miR-199b-3p_R-1	111662	147140	90326.4	97629.3	146569	109726	0	0	2		0.986452	-1.01373	0.882034	0.945966	-0.0196799	0.0241245	0.0196799
151	266	mmu-miR-199b-3p_R-1	111662	147140	90326.4	97629.3	146569	109726	0	0	2		0.986452	-1.01373	0.882034	0.945966	-0.0196799	0.0241245	0.0196799
157	274	mmu-miR-203-3p	29.2293	62.162	30.5427	30.7627	52.3447	37.2358	0	0	2		1.01322	1.01322	0.521583	0.968249	0.0189462	0.014013	0.0189462
43	76	mmu-miR-26a-5p	71027.6	78618.4	65561	73317.5	77312	61891.6	0	0	2		1.01264	1.01264	0.80337	0.888117	0.0181186	0.05153	0.0181186
45	80	mmu-miR-26a-5p	71027.6	78618.4	65561	73317.5	77312	61891.6	0	0	2		1.01264	1.01264	0.80337	0.888117	0.0181186	0.05153	0.0181186
367	615	mmu-miR-674-5p_R-1	2891.88	3172.2	3821.11	2928.28	3591.34	3490.29	0	0	2		0.987541	-1.01262	0.719368	0.909618	-0.0180869	0.0411412	0.0180869
129	228	mmu-miR-181b-5p_R-1	4600.27	3396.89	4561.77	4154.63	4000.55	4543.53	0	0	2		0.988993	-1.01113	0.286787	0.918298	-0.0159677	0.0370163	0.0159677
131	231	mmu-miR-181b-5p_R-1	4600.27	3396.89	4561.77	4154.63	4000.55	4543.53	0	0	2		0.988993	-1.01113	0.286787	0.918298	-0.0159677	0.0370163	0.0159677
366	614	mmu-miR-673-3p_R-1	124.225	220.481	179.984	156.308	183.206	190.738	0	0	2		0.989508	-1.0106	0.246023	0.953357	-0.0152169	0.0207442	0.0152169
175	179	hsa-miR-767-3p	0	4.85641	0	0	4.90731	0	2	2	0	1.62729	0.989626	-1.01048	0.989572	0.99447	-0.0150444	0.00240834	0.0150444
30	29	aca-miR-129b-5p	0	2.4282	0	0	2.45366	0	2	2	0	0.813643	0.989626	-1.01048	0.989572	0.99447	-0.0150444	0.00240834	0.0150444
31	29	aca-miR-129b-5p	0	2.4282	0	0	2.45366	0	2	2	0	0.813643	0.989626	-1.01048	0.989572	0.99447	-0.0150444	0.00240834	0.0150444
565	875	mmu-miR-6963-3p_L+1R-1_1ss23AT	0	0	14.1805	4.15712	0	9.87888	2	1	0	4.70276	1.0103	1.0103	0.53698	0.993462	0.0147793	0.00284859	0.0147793
177	305	mmu-miR-224-5p_R+1	1068.7	1211.19	451.595	1277.07	930.754	550.938	0	0	2		0.990112	-1.00999	0.894528	0.978253	-0.0143367	0.00954885	0.0143367
168	289	mmu-miR-218-5p_R+1	340.704	754.685	406.872	423.611	516.086	549.038	0	0	2		1.00909	1.00909	0.157524	0.974725	0.0130499	0.0111179	0.0130499
169	291	mmu-miR-218-5p_R+1	340.704	754.685	406.872	423.611	516.086	549.038	0	0	2		1.00909	1.00909	0.157524	0.974725	0.0130499	0.0111179	0.0130499
153	269	mmu-miR-200c-3p	248.449	169.003	268.339	307.627	185.66	198.338	0	0	2		0.991566	-1.00851	0.761093	0.970364	-0.0122193	0.0130652	0.0122193
590	903	mmu-miR-7043-3p	10.961	0	0	0	5.7252	5.3194	2	1	0	3.6676	0.99243	-1.00763	0.406192	0.994893	-0.010962	0.00222343	0.010962
47	85	mmu-miR-27a-3p_R+1_1ss19CT	23600.8	20323.1	22406.3	22492.5	25657.1	17699.5	0	0	2		1.00731	1.00731	0.292688	0.951996	0.0105029	0.021365	0.0105029
265	265	PC-3p-11142_146	46.5842	29.6241	66.5394	54.4583	47.4374	41.7953	0	0	2		0.993436	-1.00661	0.210891	0.979098	-0.00950126	0.00917383	0.00950126
70	128	mmu-miR-96-5p	42.0171	5.82769	15.2713	4.15712	32.7154	25.8371	0	0	2		1.00648	1.00648	0.773349	0.992656	0.00932303	0.00320144	0.00932303
578	890	mmu-miR-7018-3p_R-1	0	0	20.7254	9.14567	11.4504	0	2	1	0	6.88691	1.00628	1.00628	0.407852	0.995824	0.00903081	0.00181728	0.00903081
409	671	mmu-miR-770-3p	47.4976	203.969	100.355	122.219	94.0568	137.544	0	0	2		0.994349	-1.00568	0.142634	0.989518	-0.00817586	0.00457623	0.00817586
57	60	hsa-miR-320b_R-1_1ss20CA	10.961	119.468	140.715	102.265	77.6991	92.7095	0	0	2		0.994386	-1.00565	0.0613795	0.990623	-0.00812192	0.0040914	0.00812192
62	113	mmu-miR-33-5p_R-1	10.961	12.6267	19.6346	20.7856	8.99674	13.6785	0	0	2		0.994511	-1.00552	0.751005	0.986248	-0.00794126	0.00601391	0.00794126
627	945	mmu-miR-7689-3p	0	0	19.6346	11.6399	4.08943	3.79957	2	0	1		1.00541	1.00541	0.26656	0.996243	0.00778341	0.00163465	0.00778341
498	795	mmu-mir-3471-2-p3_1ss13AC	27.4025	131.123	68.721	34.9198	102.236	88.91	0	0	2		1.00522	1.00522	0.635776	0.991911	0.00751736	0.00352709	0.00751736
88	92	rno-miR-465-5p_R+1	12.7878	0	0	6.6514	0	6.07931	2	1	0	4.25309	1.00449	1.00449	0.399068	0.997003	0.00645852	0.00130363	0.00645852
366	613	mmu-miR-673-5p_R-1	573.625	1131.54	979.548	700.059	956.108	1021.32	0	0	2		1.0027	1.0027	0.514825	0.990655	0.00388691	0.00407743	0.00388691
78	141	mmu-miR-103-3p	22190.8	26020	18416.7	27561	19839.7	19404.9	0	0	2		0.997333	-1.00267	0.814061	0.987055	-0.00385244	0.00565872	0.00385244
79	143	mmu-miR-103-3p	22190.8	26020	18416.7	27561	19839.7	19404.9	0	0	2		0.997333	-1.00267	0.814061	0.987055	-0.00385244	0.00565872	0.00385244
82	148	mmu-miR-107-3p_1ss22CG	22190.8	26020	18416.7	27561	19839.7	19404.9	0	0	2		0.997333	-1.00267	0.814061	0.987055	-0.00385244	0.00565872	0.00385244
442	716	mmu-miR-1843a-5p_L-1R+1	613.816	528.863	452.141	580.75	528.763	488.625	0	0	2		0.997923	-1.00208	0.491932	0.984572	-0.0029989	0.0067525	0.0029989
36	63	mmu-miR-21a-3p	301.427	272.93	277.066	420.701	242.094	189.979	0	0	2		0.998417	-1.00159	0.0318733	0.995465	-0.00228609	0.0019741	0.00228609
629	947	mmu-miR-8103_R+3	0	5.82769	0	5.81997	0	0	2	2	0	1.94128	1.00133	1.00133	0.998675	0.999297	0.00191138	0.00030525	0.00191138
431	700	mmu-miR-1194_1ss3AC	16.4415	15.5405	16.3622	15.7971	18.8114	13.6785	0	0	2		1.00119	1.00119	0.0721102	0.990563	0.00170977	0.00411791	0.00170977
299	510	mmu-miR-467e-5p	82.2075	55.363	90.5372	102.265	62.9772	63.0729	0	0	2		0.999091	-1.00091	0.793931	0.99692	-0.0013119	0.00133972	0.0013119
237	409	mmu-miR-377-3p_L+3R-2	200.952	269.045	181.074	128.039	214.286	308.525	0	0	2		1.00034	1.00034	0.414191	0.999058	0.000488576	0.000409127	0.000488576
413	675	mmu-miR-872-5p	1644.15	1844.46	1028.63	1843.27	1425.57	1248.54	0	0	2		0.99997	-1.00003	0.680641	0.999888	-4.31396e-05	4.85295e-05	4.31396e-05
