# Supplementary material for: miR-344d-3p regulates osteogenic and adipogenic differentiation of mouse mandibular bone marrow mesenchymal stem cells
Source: PeerJ. 2023 Feb 14;11:e14838. doi: 10.7717/peerj.14838 (PMC9936866; doi:10.7717/peerj.14838)
Supplement: Supplemental Information 16 — miR-344d-3p sequence from riginal sequencing results [file peerj-11-14838-s016.xlsx]

## Sheet: Sheet1
Pre-miRNA Index	miRNA_Index	miR_name	miR_seq	len	genomeID	strand	start	end	pre-miRNA_seq	#mir/MIR	mirIDs,	rep_mirID	rep_mirSeq	rep_miRID	rep_miRSeq	type	Sequence in miRbase	group	SS	hairpinLen	CG%	dG	Ohe1(raw)	Ohe2(raw)	Ohe3(raw)	She1(raw)	She2(raw)	She3(raw)	Ohe1(norm)	Ohe2(norm)	Ohe3(norm)	She1(norm)	She2(norm)	She3(norm)	Expression level
215	372	mmu-miR-344d-3p	GATATAACCACTGCCAGACTGA	22	chr7	-	61726249	61726328	agatttcatcAGTCAGGCTAGTGGTTATACTccaggacttatctggtcctgGATATAACCACTGCCAGACTGAatggtgc	1	mmu-mir-344d-3,	mmu-mir-344d-3	agatttcatcAGTCAGGCTAGTGGTTATACTCCaggacttatctggtcctgGATATAACCACTGCCAGACTGAatggtgc	mmu-miR-344d-3p	GATATAACCACTGCCAGACTGA	3'	Yes	gp1a	.....(((((((((.(((.((((((((((.(((((((((.....)))))))))))))))))))))).)))))).)))...	72	46.2	-45.2	0	0	2.33333	21.6667	29.3333	25.6667	0	0	2.54522	18.0142	23.9913	19.5045	middle
216	373	mmu-miR-344d-3p	GATATAACCACTGCCAGACTGA	22	chr7	-	61685272	61685351	agatttcattagtctggttgctggctatattccaggacttatctggtcctgGATATAACCACTGCCAGACTGAatggtgc	1	mmu-mir-344d-2,	mmu-mir-344d-2	agatttcattAGTCTGGTTGCTGGCTATATTCCAggacttatctggtcctgGATATAACCACTGCCAGACTGAatggtgc	mmu-miR-344d-3p	GATATAACCACTGCCAGACTGA	3'	Yes	gp1a	.....(((((((((((((...(((.(((((.((((((((.....))))))))))))).)))..)))))))))).)))...	72	45	-37.6	0	0	2.33333	21.6667	29.3333	25.6667	0	0	2.54522	18.0142	23.9913	19.5045	middle
218	375	mmu-miR-344d-3p	GATATAACCACTGCCAGACTGA	22	chr7	-	61683124	61683192	atcagtcaggctgctggctatacaccaggacttatctggtcctgGATATAACCACTGCCAGACTGAaag	1	mmu-mir-344d-1,	mmu-mir-344d-1	atcAGTCAGGCTGCTGGCTATACACCAggacttatctggtcctgGATATAACCACTGCCAGACTGAaag	mmu-miR-344d-3p	GATATAACCACTGCCAGACTGA	3'	Yes	gp1a	.((((((.(((...(((.((((..((((((((.....)))))))).)))).)))..))).))))))...	65	49.3	-32.6	0	0	2.33333	21.6667	29.3333	25.6667	0	0	2.54522	18.0142	23.9913	19.5045	middle
