# Supplementary material for: miR-344d-3p regulates osteogenic and adipogenic differentiation of mouse mandibular bone marrow mesenchymal stem cells
Source: PeerJ. 2023 Feb 14;11:e14838. doi: 10.7717/peerj.14838 (PMC9936866; doi:10.7717/peerj.14838)
Supplement: Supplemental Information 17 [file peerj-11-14838-s017.xlsx]

## Sheet: Sheet1
Item	Description
Pre-miRNA Index	Pre-miRNA Cluster Index
miRNA_Index	mature miRNA
miR_name	The miR_name is composed of the 1st known miR name in a cluster, a underscore, and a matching annotation: such as
	L-n means the miRNA_seq (detected) is n base less than known rep_miRSeq in the left side;
	R-n means the miRNA_seq (detected) is n base less than known rep_miRSeq in the right side;
	L+n means the miRNA_seq (detected) is n base more than known rep_miRSeq in the left side;
	R+n means the miRNA_seq (detected) is n base more than known rep_miRSeq in the right side;
	2ss5TC13TA means 2 substitution (ss), which are T->C at position 5 and T->A at position 13
	if there is no matching annotation, the miRNA_seq (detected) is exactly same as known rep_miRSeq.
	New discovered 5p/3p sequence has been annotated as p3/p5: which is directly differentiate with the reported sequences,
miR_seq	is a read at 5' or 3' of maximum mapped score in each cluster.
len	miR_seq length
genome ID	Reference Genome Information
strand	strand "+" or "-"
start	pre-miRNA start position
end	Pre-miRNA end position
pre-miRNA_seq	pre-miRNA sequence
#mir/MIR	mapped mir numbers in miRbase, the number in this item eaquals to the sum of mirIDs
mirIDs	is all mirID in a cluster, seprated by ,
rep_mirID	is the representative known mirID
rep_mirSeq	is the representative known mir sequence
rep_miRID	is the representative known miRID
rep_miRSeq	is the representative known miR sequence
type	is 5' or 3', which means the cluster appears at 5' or 3' end
Sequence in miRbase	New, miRNA identified in this study and not reported in miRBase,mainly for new reported 5p or 3p sequence; Diff, confirming miRNA sequences in miRBase, but different sequences are reported in our study; and Yes, confirming miRNA sequences in miRBase.
group	gp1a:Reads were mapped to miRNAs/pre-miRNAs of specific species in miRbase and the pre-miRNAs were further mapped to genome & EST.
	gp1b:Reads were mapped to (except for specific species) miRNAs/pre-miRNAs of selected species in miRbase and the pre-miRNAs were further mapped to genome & EST.
	gp2a:Reads were mapped to miRNAs/pre-miRNAs of selected species in miRbase and the mapped pre-miRNAs were not further mapped to genome, but the reads (and of course the miRNAs of the pre-miRNAs) were mapped to genome. The extended genome sequences from the genome loci may form hairpins.
	gp2b:Reads were mapped to miRNAs/pre-miRNAs of selected species in miRbase and the mapped pre-miRNAs were not further mapped to genome, but the reads (and of course the miRNAs of the pre-miRNAs) were mapped to genome. The extended genome sequences from the genome loci may not form hairpins.
	gp3:Reads were mapped to miRNAs/pre-miRNAs of selected species in miRbase and the mapped pre-miRNAs were not further mapped to genome, and the reads were not mapped to genome, either. but the reads were mapped to the miRNAS(Matures)
	gp4:Reads were not mapped to pre-miRNAs of selected species in miRbase. But the reads were mapped to genome & the extended genome sequences from genome may form hairpins.
SS	Secondary Structure
	Criteria:
	1.number of nucleotides in one bulge in stem : <= 12
	2.number of base pairs in the stem region of the predicted hairpin : >= 16
	3.cutoff of free energy : kCal/mol <= -15
	4.length of hairpin : up and down stems + terminal loop >= 50
	8.number of biased bulges in mature region : <= 2
	10.number of base pairs in the mature region of the predicted hairpin : >= 12
	11.percent of mature in stem : >= 80
hairpinLen	pre-miRNA length
CG%	GC Content
dG	Free energy
raw	Raw data; from #reads(all),is the number of reads for isoform at 5' or 3' end.
norm	Normalized data
Expression Level	High:The number of reads in the following reported miRNAs is higher than the average copy of the data set.Medium:The number of reads in the following reported miRNAs is higher than 10 and less than average copy of the data set.Low:The number of reads in the following reported miRNAs is less than 10
Summary of known and predicted miRNA in this study.
Pre-miRNA Index	miRNA_Index	miR_name	miR_seq	len	genomeID	strand	start	end	pre-miRNA_seq	#mir/MIR	mirIDs,	rep_mirID	rep_mirSeq	rep_miRID	rep_miRSeq	type	Sequence in miRbase	group	SS	hairpinLen	CG%	dG	Ohe1(raw)	Ohe2(raw)	Ohe3(raw)	She1(raw)	She2(raw)	She3(raw)	Ohe1(norm)	Ohe2(norm)	Ohe3(norm)	She1(norm)	She2(norm)	She3(norm)	Expression level
1	1	mmu-miR-1a-3p	TGGAATGTAAAGAAGTATGTAT	22	chr2	+	180389043	180389135	tacctgcttgggacacatacttctttatatgcccatatgaacctgctaagctaTGGAATGTAAAGAAGTATGTATttcaggctaggaactctc	25	mmu-mir-1a-1,rno-mir-1b,cpo-mir-1b,hsa-mir-1-1,ppy-mir-1-1,bta-mir-1-1,eca-mir-1-2,ptr-mir-1-1,mdo-mir-1-2,mml-mir-1-1,cja-mir-1a-2,cfa-mir-1-1,efu-mir-1-2,ssc-mir-1,pal-mir-1-2,dno-mir-1-1,chi-mir-1,gga-mir-1a-1,oni-mir-1-1,gmo-mir-1-1,pol-mir-1,aca-mir-1a-2,cli-mir-1a-1,tgu-mir-1-1,xtr-mir-1a-2,	mmu-mir-1a-1	gcttgggacACATACTTCTTTATATGCCCATAtgaacctgctaagctaTGGAATGTAAAGAAGTATGTATttcaggc	mmu-miR-1a-3p	TGGAATGTAAAGAAGTATGTAT	3'	Yes	gp1a	..((((((((..(.((((((((((((((((..(((((..............))))).)))))))))))))))).)..))))).))).......	84	39.8	-37.6	61.5	109	125	89	117	88	112.35	105.87	136.351	73.9968	95.6926	66.8724	middle
2	2	mmu-miR-1a-3p	TGGAATGTAAAGAAGTATGTAT	22	chr18	-	10785473	10785559	tgcctactcagagcacatacttctttatgtacccatatgaacattcagtgctaTGGAATGTAAAGAAGTATGTATtttgggtaggta	22	mmu-mir-1a-2,rno-mir-1,cpo-mir-1a,pal-mir-1-1,ocu-mir-1-2,xla-mir-1a,hsa-mir-1-2,bta-mir-1-2,ppa-mir-1,eca-mir-1-1,ptr-mir-1-2,mdo-mir-1-1,mml-mir-1-2,cja-mir-1a-1,cfa-mir-1-2,efu-mir-1-1,dno-mir-1-2,gga-mir-1a-2,oni-mir-1-2,gmo-mir-1-2,tgu-mir-1-2,fru-mir-1,	mmu-mir-1a-2	tcagagcACATACTTCTTTATGTACCCATAtgaacattcagtgctaTGGAATGTAAAGAAGTATGTATtttg	mmu-miR-1a-3p	TGGAATGTAAAGAAGTATGTAT	3'	Yes	gp1a	((((((((((((..(((((((((((((..(..(((((...((.....))..))))).)..)))))))))))))..))))))))))))	87	36.8	-40.1	61.5	109	125	89	117	88	112.35	105.87	136.351	73.9968	95.6926	66.8724	middle
3	3	mmu-let-7f-5p	TGAGGTAGTAGATTGTATAGTT	22	chr13	-	48537821	48537929	aaaacttgctctatcagagTGAGGTAGTAGATTGTATAGTTgtggggtagtgattttaccctgtttaggagataaCTATACAATCTATTGCCTTCCCtgaggagtagac	31	mmu-let-7f-1,rno-let-7f-1,cpo-let-7f-1,cgr-let-7f,hsa-let-7f-1,bta-let-7f-1,mdo-let-7f-1,ppy-let-7f-1,mml-let-7f-1,eca-let-7f,ptr-let-7f-1,cja-let-7f,cfa-let-7f,pal-let-7f,dno-let-7f-1,ocu-let-7f-1,tch-let-7f,ppa-let-7f,nle-let-7f,oga-let-7f,mmr-let-7f,dma-let-7f,sbo-let-7f,efu-let-7f,ssc-let-7f-2,ggo-let-7f,chi-let-7f,gga-let-7f,oni-let-7f,cli-let-7f,tgu-let-7f,	mmu-let-7f-1	atcagagTGAGGTAGTAGATTGTATAGTTgtggggtagtgattttaccctgtttaggagataaCTATACAATCTATTGCCTTCCCtgag	mmu-let-7f-5p	TGAGGTAGTAGATTGTATAGTT	5'	Yes	gp1a	.....(((((((.((((...((((((((((((((((((((((((((((((.....))))))).........)))))))))))))))))))))))..)))))))))))..	102	39.4	-49.7	73728.3	139406	73830.7	199206	133579	131571	134689	135402	80535.3	165625	109252	99982.4	high
3	4	mmu-let-7f-1-3p_1ss22CT	CTATACAATCTATTGCCTTCCT	22	chr13	-	48537821	48537929	aaaacttgctctatcagagTGAGGTAGTAGATTGTATAGTTgtggggtagtgattttaccctgtttaggagataaCTATACAATCTATTGCCTTCCCtgaggagtagac	31	mmu-let-7f-1,rno-let-7f-1,cpo-let-7f-1,cgr-let-7f,hsa-let-7f-1,bta-let-7f-1,mdo-let-7f-1,ppy-let-7f-1,mml-let-7f-1,eca-let-7f,ptr-let-7f-1,cja-let-7f,cfa-let-7f,pal-let-7f,dno-let-7f-1,ocu-let-7f-1,tch-let-7f,ppa-let-7f,nle-let-7f,oga-let-7f,mmr-let-7f,dma-let-7f,sbo-let-7f,efu-let-7f,ssc-let-7f-2,ggo-let-7f,chi-let-7f,gga-let-7f,oni-let-7f,cli-let-7f,tgu-let-7f,	mmu-let-7f-1	atcagagTGAGGTAGTAGATTGTATAGTTgtggggtagtgattttaccctgtttaggagataaCTATACAATCTATTGCCTTCCCtgag	mmu-let-7f-1-3p	CTATACAATCTATTGCCTTCCC	3'	Diff	gp1a	.....(((((((.((((...((((((((((((((((((((((((((((((.....))))))).........)))))))))))))))))))))))..)))))))))))..	102	39.4	-49.7	30	32	35	18	43	43	54.805	31.081	38.1784	14.9656	35.1691	32.6763	middle
4	5	mmu-let-7d-5p	AGAGGTAGTAGGTTGCATAGTT	22	chr13	-	48536010	48536115	aaatgggttcctaggaAGAGGTAGTAGGTTGCATAGTTttagggcagagattttgcccacaaggagttaaCTATACGACCTGCTGCCTTTCTtagggccttattat	22	mmu-let-7d,rno-let-7d,cpo-let-7d,ocu-let-7d,cgr-let-7d,hsa-let-7d,ppy-let-7d,mml-let-7d,oar-let-7d,bta-let-7d,eca-let-7d,ptr-let-7d,mdo-let-7d,cja-let-7d,cfa-let-7d,efu-let-7d,ssc-let-7d,dno-let-7d,chi-let-7d,aca-let-7d,cli-let-7d,tgu-let-7d,	mmu-let-7d	aatgggttcctaggaAGAGGTAGTAGGTTGCATAGTTttagggcagagattttgcccacaaggagttaaCTATACGACCTGCTGCCTTTCTtagggccttatt	mmu-let-7d-5p	AGAGGTAGTAGGTTGCATAGTT	5'	Yes	gp1a	.(((..(..((((((.(((((((((((((((.((((((...(((((((...)))))))..........)))))).)))))))))))))))))))))..)..)))..	103	43.4	-49.4	33117.2	63876.5	32486.2	79753	57804.2	69544.8	60499.7	62042	35436.3	66308.6	47277.3	52848	high
4	6	mmu-let-7d-3p	CTATACGACCTGCTGCCTTTCT	22	chr13	-	48536010	48536115	aaatgggttcctaggaAGAGGTAGTAGGTTGCATAGTTttagggcagagattttgcccacaaggagttaaCTATACGACCTGCTGCCTTTCTtagggccttattat	22	mmu-let-7d,rno-let-7d,cpo-let-7d,ocu-let-7d,cgr-let-7d,hsa-let-7d,ppy-let-7d,mml-let-7d,oar-let-7d,bta-let-7d,eca-let-7d,ptr-let-7d,mdo-let-7d,cja-let-7d,cfa-let-7d,efu-let-7d,ssc-let-7d,dno-let-7d,chi-let-7d,aca-let-7d,cli-let-7d,tgu-let-7d,	mmu-let-7d	aatgggttcctaggaAGAGGTAGTAGGTTGCATAGTTttagggcagagattttgcccacaaggagttaaCTATACGACCTGCTGCCTTTCTtagggccttatt	mmu-let-7d-3p	CTATACGACCTGCTGCCTTTCT	3'	Yes	gp1a	.(((..(..((((((.(((((((((((((((.((((((...(((((((...)))))))..........)))))).)))))))))))))))))))))..)..)))..	103	43.4	-49.4	33711	75887	91033	63308	54257	73387	61584.4	73707.6	99299.7	52635.8	44376	55767.8	high
5	7	mmu-let-7i-5p	TGAGGTAGTAGTTTGTGCTGTT	22	chr10	-	122985629	122985735	acaccatggccctggcTGAGGTAGTAGTTTGTGCTGTTggtcgggttgtgacattgcccgctgtggagataaCTGCGCAAGCTACTGCCTTGCTagtgctggtgatg	35	mmu-let-7i,rno-let-7i,mml-let-7i,ssc-let-7i,aja-let-7i,cpo-let-7i,cja-let-7i,dno-let-7i,ocu-let-7i,tch-let-7i,ppa-let-7i,nle-let-7i,cgr-let-7i,hsa-let-7i,bta-let-7i,mdo-let-7i,ppy-let-7i,oar-let-7i,gga-let-7i,cli-let-7i,ptr-let-7i,ggo-let-7i,chi-let-7i,pal-let-7i,oga-let-7i,oni-let-7i-2,gmo-let-7i-1,gmo-let-7i-2,dre-let-7i,aca-let-7i,tgu-let-7i,xtr-let-7i,xla-let-7i,tni-let-7i,fru-let-7i,	mmu-let-7i	ctggcTGAGGTAGTAGTTTGTGCTGTTggtcgggttgtgacattgcccgctgtggagataaCTGCGCAAGCTACTGCCTTGCTag	mmu-let-7i-5p	TGAGGTAGTAGTTTGTGCTGTT	5'	Yes	gp1a	.((((..(((.(((((.(((((((((((((((((.(((((.(((((.........)))))))........))).)))))))))))))))))))))).)))))))...	103	55.1	-52.5	95713	201380	118276	359583	189056	166706	174852	195597	129017	298966	154626	126683	high
5	8	mmu-let-7i-3p	CTGCGCAAGCTACTGCCTTGCT	22	chr10	-	122985629	122985735	acaccatggccctggcTGAGGTAGTAGTTTGTGCTGTTggtcgggttgtgacattgcccgctgtggagataaCTGCGCAAGCTACTGCCTTGCTagtgctggtgatg	35	mmu-let-7i,rno-let-7i,mml-let-7i,ssc-let-7i,aja-let-7i,cpo-let-7i,cja-let-7i,dno-let-7i,ocu-let-7i,tch-let-7i,ppa-let-7i,nle-let-7i,cgr-let-7i,hsa-let-7i,bta-let-7i,mdo-let-7i,ppy-let-7i,oar-let-7i,gga-let-7i,cli-let-7i,ptr-let-7i,ggo-let-7i,chi-let-7i,pal-let-7i,oga-let-7i,oni-let-7i-2,gmo-let-7i-1,gmo-let-7i-2,dre-let-7i,aca-let-7i,tgu-let-7i,xtr-let-7i,xla-let-7i,tni-let-7i,fru-let-7i,	mmu-let-7i	ctggcTGAGGTAGTAGTTTGTGCTGTTggtcgggttgtgacattgcccgctgtggagataaCTGCGCAAGCTACTGCCTTGCTag	mmu-let-7i-3p	CTGCGCAAGCTACTGCCTTGCT	3'	Yes	gp1a	.((((..(((.(((((.(((((((((((((((((.(((((.(((((.........)))))))........))).)))))))))))))))))))))).)))))))...	103	55.1	-52.5	86	195	319	445	630	379	157.108	189.4	347.968	369.984	515.268	288.007	middle
6	9	mmu-let-7b-5p	TGAGGTAGTAGGTTGTGTGGTT	22	chr15	+	85707316	85707415	accgcagggTGAGGTAGTAGGTTGTGTGGTTtcagggcagtgatgttgcccctccgaagataaCTATACAACCTACTGCCTTCCCtgaggcgcccaggga	31	mmu-let-7b,rno-let-7b,cpo-let-7b,cgr-let-7b,hsa-let-7b,bta-let-7b,ptr-let-7b,mdo-let-7b,ppy-let-7b,mml-let-7b,cfa-let-7b,ggo-let-7b,dno-let-7b,ocu-let-7b,chi-let-7b,ppa-let-7b,oga-let-7b,mmr-let-7b,dma-let-7b,sbo-let-7b,oar-let-7b,gga-let-7b,oni-let-7b-1,dre-let-7b,tgu-let-7b,ola-let-7b-1,ola-let-7b-2,ccr-let-7b,tni-let-7b,fru-let-7b,pol-let-7b,	mmu-let-7b	gcagggTGAGGTAGTAGGTTGTGTGGTTtcagggcagtgatgttgcccctccgaagataaCTATACAACCTACTGCCTTCCCtga	mmu-let-7b-5p	TGAGGTAGTAGGTTGTGTGGTT	5'	Yes	gp1a	.((.(((((.(((((((((((((((((((((((.((((((.....))))))....))....)))))))))))))))))))))))))).))..........	89	56	-52.2	31705.5	80628.1	111463	97223.7	110250	184643	57920.6	78312.6	121585	80834.2	90171.6	140313	high
6	10	mmu-let-7b-3p_1ss22CT	CTATACAACCTACTGCCTTCCT	22	chr15	+	85707316	85707415	accgcagggTGAGGTAGTAGGTTGTGTGGTTtcagggcagtgatgttgcccctccgaagataaCTATACAACCTACTGCCTTCCCtgaggcgcccaggga	31	mmu-let-7b,rno-let-7b,cpo-let-7b,cgr-let-7b,hsa-let-7b,bta-let-7b,ptr-let-7b,mdo-let-7b,ppy-let-7b,mml-let-7b,cfa-let-7b,ggo-let-7b,dno-let-7b,ocu-let-7b,chi-let-7b,ppa-let-7b,oga-let-7b,mmr-let-7b,dma-let-7b,sbo-let-7b,oar-let-7b,gga-let-7b,oni-let-7b-1,dre-let-7b,tgu-let-7b,ola-let-7b-1,ola-let-7b-2,ccr-let-7b,tni-let-7b,fru-let-7b,pol-let-7b,	mmu-let-7b	gcagggTGAGGTAGTAGGTTGTGTGGTTtcagggcagtgatgttgcccctccgaagataaCTATACAACCTACTGCCTTCCCtga	mmu-let-7b-3p	CTATACAACCTACTGCCTTCCC	3'	Diff	gp1a	.((.(((((.(((((((((((((((((((((((.((((((.....))))))....))....)))))))))))))))))))))))))).))..........	89	56	-52.2	111	129	179	141	201	204	202.778	125.295	195.255	117.231	164.395	155.022	middle
7	11	mmu-let-7e-5p	TGAGGTAGGAGGTTGTATAGTT	22	chr17	+	17830346	17830450	acctgccgcgccccccgggcTGAGGTAGGAGGTTGTATAGTTgaggaagacacccgaggagatcaCTATACGGCCTCCTAGCTTTCCccaggctgcgccctgcac	21	mmu-let-7e,rno-let-7e,cpo-let-7e,cgr-let-7e,hsa-let-7e,bta-let-7e,ppy-let-7e,mml-let-7e,eca-let-7e,ptr-let-7e,cja-let-7e,cfa-let-7e,efu-let-7e,ssc-let-7e,ggo-let-7e,chi-let-7e,pal-let-7e,tch-let-7e,ppa-let-7e,oga-let-7e,nle-let-7e,	mmu-let-7e	cgcgccccccgggcTGAGGTAGGAGGTTGTATAGTTgaggaagacacccgaggagatcaCTATACGGCCTCCTAGCTTTCCccaggctgcgcc	mmu-let-7e-5p	TGAGGTAGGAGGTTGTATAGTT	5'	Yes	gp1a	...(((.((((..((.(((..(((.(((((((..(((((((.((..................)))))))))..))))))).)))..))).))..))))...))).	101	62.9	-46.3	14338.7	36728.2	26259.3	47009.9	30292.8	42264.2	26194.3	35673.5	28643.9	39085.2	24776	32117.2	high
7	12	mmu-let-7e-3p	CTATACGGCCTCCTAGCTTTCC	22	chr17	+	17830346	17830450	acctgccgcgccccccgggcTGAGGTAGGAGGTTGTATAGTTgaggaagacacccgaggagatcaCTATACGGCCTCCTAGCTTTCCccaggctgcgccctgcac	21	mmu-let-7e,rno-let-7e,cpo-let-7e,cgr-let-7e,hsa-let-7e,bta-let-7e,ppy-let-7e,mml-let-7e,eca-let-7e,ptr-let-7e,cja-let-7e,cfa-let-7e,efu-let-7e,ssc-let-7e,ggo-let-7e,chi-let-7e,pal-let-7e,tch-let-7e,ppa-let-7e,oga-let-7e,nle-let-7e,	mmu-let-7e	cgcgccccccgggcTGAGGTAGGAGGTTGTATAGTTgaggaagacacccgaggagatcaCTATACGGCCTCCTAGCTTTCCccaggctgcgcc	mmu-let-7e-3p	CTATACGGCCTCCTAGCTTTCC	3'	Yes	gp1a	...(((.((((..((.(((..(((.(((((((..(((((((.((..................)))))))))..))))))).)))..))).))..))))...))).	101	62.9	-46.3	199	366	373	524	511	420	363.54	355.489	406.872	435.666	417.939	319.164	middle
8	13	mmu-miR-7b-5p_R-1	TGGAAGACTTGTGATTTTGTTGT	23	chr17	+	56242988	56243098	aggagcggagtacgtgagccagtgctatgTGGAAGACTTGTGATTTTGTTGTtctgatatgatatgacaacaagtcacagccagcctcatagcgtggactcctatcacctt	3	mmu-mir-7b,rno-mir-7b,cgr-mir-7b,	mmu-mir-7b	aggagcggagtacgtgagccagtgctatgTGGAAGACTTGTGATTTTGTTGTTctgatatgatatgaCAACAAGTCACAGCCAGCCTCAtagcgtggactcctatcacctt	mmu-miR-7b-5p	TGGAAGACTTGTGATTTTGTTGTT	5'	Diff	gp1a	(((.(((.....)))((((((.(((((((.((.....(((((((((.(((((..((......))..))))))))))))))....)).)))))))))).)))......))).	86	46.8	-35.8	5	7	0	0	0	0	9.13416	6.79897	0	0	0	0	low
9	14	mmu-let-7j_R-1_1ss8TG	TGAGGTAGTAGTTTGTGCTGTTA	23	chr3	+	140028249	140028370	attggaggctatttctgatcatgataatttccTGAGGTATTAGTTTGTGCTGTTAtatgaatcgaataatatcccttgctcagattaaaagcctggagttaaaaaaatcaagtgccttgaac	1	mmu-let-7j,	mmu-let-7j	attggaggctatttctgatcatgataatttccTGAGGTATTAGTTTGTGCTGTTATatgaatcgaataatatcccttgctcagattaaaagcctggagttaaaaaaatcaagtgccttgaac	mmu-let-7j	TGAGGTATTAGTTTGTGCTGTTAT	5'	Diff	gp1a	....(((((.(((..((((.....(((((((...((((.((((((((.((....((((..........)))).....)).))))))))..))))))))))).....))))))))))))....	114	34.4	-23.3	6828	17974.5	9674.5	27339.5	16832	17609	12473.6	17458.3	10553	22730.7	13766.6	13381.3	high
10	15	mmu-let-7f-5p	TGAGGTAGTAGATTGTATAGTT	22	chrX	+	151912345	151912430	ctgtgggaTGAGGTAGTAGATTGTATAGTTttagggtcataccccatcttggagataaCTATACAGTCTACTGTCTTTCCcacggt	23	mmu-let-7f-2,rno-let-7f-2,hsa-let-7f-2,bta-let-7f-2,ppy-let-7f-2,mml-let-7f-2,ssc-let-7f-1,oar-let-7f,cpo-let-7f-2,dno-let-7f-2,ptr-let-7f-2,mdo-let-7f-2,ocu-let-7f-2,oni-let-7g-1,gmo-let-7g-2,gmo-let-7g-1,dre-let-7g-2,aca-let-7f-1,xtr-let-7f,xla-let-7f,ccr-let-7g,tni-let-7g,fru-let-7g,	mmu-let-7f-2	tgtgggaTGAGGTAGTAGATTGTATAGTTttagggtcataccccatcttggagataaCTATACAGTCTACTGTCTTTCccacg	mmu-let-7f-5p	TGAGGTAGTAGATTGTATAGTT	5'	Yes	gp1a	((((((((.(((..((((((((((((((((...(((.....))).(((.....)))))))))))))))))))..))))))))))).	85	43	-43.1	73728.3	139406	73830.7	199206	133579	131571	134689	135402	80535.3	165625	109252	99982.4	high
10	16	cpo-let-7f-2-3p_1ss22CT	CTATACAGTCTACTGTCTTTCT	22	chrX	+	151912345	151912430	ctgtgggaTGAGGTAGTAGATTGTATAGTTttagggtcataccccatcttggagataaCTATACAGTCTACTGTCTTTCCcacggt	23	mmu-let-7f-2,rno-let-7f-2,hsa-let-7f-2,bta-let-7f-2,ppy-let-7f-2,mml-let-7f-2,ssc-let-7f-1,oar-let-7f,cpo-let-7f-2,dno-let-7f-2,ptr-let-7f-2,mdo-let-7f-2,ocu-let-7f-2,oni-let-7g-1,gmo-let-7g-2,gmo-let-7g-1,dre-let-7g-2,aca-let-7f-1,xtr-let-7f,xla-let-7f,ccr-let-7g,tni-let-7g,fru-let-7g,	cpo-let-7f-2	TGAGGTAGTAGATTGTATAGTTttagggtcataccccatcttggagataaCTATACAGTCTACTGTCTTTCC	cpo-let-7f-2-3p	CTATACAGTCTACTGTCTTTCC	3'	Diff	gp1a	((((((((.(((..((((((((((((((((...(((.....))).(((.....)))))))))))))))))))..))))))))))).	85	43	-43.1	92.3333	131.667	172	110.667	139.667	131	168.678	127.885	187.619	92.011	114.231	99.5488	middle
11	17	mmu-let-7c-5p	TGAGGTAGTAGGTTGTATGGTT	22	chr16	+	77599652	77599759	gaagctgtgtgcatccgggtTGAGGTAGTAGGTTGTATGGTTtagagttacaccctgggagttaaCTGTACAACCTTCTAGCTTTCCttggagcacacttgagccatc	38	mmu-let-7c-1,rno-let-7c-1,cpo-let-7c,cja-let-7c,cfa-let-7c,pal-let-7c,dno-let-7c-1,ocu-let-7c,ppa-let-7c,nle-let-7c,oga-let-7c,mmr-let-7c,dma-let-7c,cgr-let-7c-1,hsa-let-7c,bta-let-7c,ppy-let-7c,mml-let-7c,oar-let-7c,gga-let-7c,eca-let-7c,ptr-let-7c,efu-let-7c,ssc-let-7c,ggo-let-7c,chi-let-7c,oni-let-7c,gmo-let-7c,dre-let-7c-2,aca-let-7c-1,aca-let-7c-3,cli-let-7c,tgu-let-7c-1,tgu-let-7c-2,xtr-let…	mmu-let-7c-1	tgtgtgcatccgggtTGAGGTAGTAGGTTGTATGGTTtagagttacaccctgggagttaaCTGTACAACCTTCTAGCTTTCCttggagcacact	mmu-let-7c-5p	TGAGGTAGTAGGTTGTATGGTT	5'	Yes	gp1a	...(((((((((.(((..(..(((.(((.((((((((..(((..((.(..(.....)..).)))))..)))))))).))).)))..)..)))))))))...)))....	101	48.1	-43.4	46947.7	102993	59744.8	121435	120011	141143	85765.5	100035	65170.2	100964	98155.3	107257	high
11	18	mmu-let-7c-1-3p	CTGTACAACCTTCTAGCTTTCC	22	chr16	+	77599652	77599759	gaagctgtgtgcatccgggtTGAGGTAGTAGGTTGTATGGTTtagagttacaccctgggagttaaCTGTACAACCTTCTAGCTTTCCttggagcacacttgagccatc	38	mmu-let-7c-1,rno-let-7c-1,cpo-let-7c,cja-let-7c,cfa-let-7c,pal-let-7c,dno-let-7c-1,ocu-let-7c,ppa-let-7c,nle-let-7c,oga-let-7c,mmr-let-7c,dma-let-7c,cgr-let-7c-1,hsa-let-7c,bta-let-7c,ppy-let-7c,mml-let-7c,oar-let-7c,gga-let-7c,eca-let-7c,ptr-let-7c,efu-let-7c,ssc-let-7c,ggo-let-7c,chi-let-7c,oni-let-7c,gmo-let-7c,dre-let-7c-2,aca-let-7c-1,aca-let-7c-3,cli-let-7c,tgu-let-7c-1,tgu-let-7c-2,xtr-let…	mmu-let-7c-1	tgtgtgcatccgggtTGAGGTAGTAGGTTGTATGGTTtagagttacaccctgggagttaaCTGTACAACCTTCTAGCTTTCCttggagcacact	mmu-let-7c-1-3p	CTGTACAACCTTCTAGCTTTCC	3'	Yes	gp1a	...(((((((((.(((..(..(((.(((.((((((((..(((..((.(..(.....)..).)))))..)))))))).))).)))..)..)))))))))...)))....	101	48.1	-43.4	43	58	32	19	65	35	78.5538	56.3343	34.9059	15.7971	53.1626	26.597	middle
12	19	mmu-let-7c-5p	TGAGGTAGTAGGTTGTATGGTT	22	chr15	+	85706598	85706704	gactgacggcctttggggTGAGGTAGTAGGTTGTATGGTTttgggctctgccccgctctgcggtaaCTATACAATCTACTGTCTTTCCtgaagtggccgcaatatct	24	mmu-let-7c-2,rno-let-7c-2,cpo-let-7a-3,cgr-let-7c-2,hsa-let-7a-3,bta-let-7a-3,ppy-let-7a-3,mml-let-7a-3,eca-let-7a-2,ptr-let-7a-3,cfa-let-7a-1,ggo-let-7a,pal-let-7a-1,ppa-let-7a-1,nle-let-7a-1,dma-let-7a-1,ocu-let-7a-3,chi-let-7a,mmr-let-7a-1,gga-let-7a-3,aca-let-7a-3,cli-let-7a-3,tgu-let-7a-1,xtr-let-7e-2,	mmu-let-7c-2	acggcctttggggTGAGGTAGTAGGTTGTATGGTTttgggctctgccccgctctgcggtaaCTATACAATCTACTGTCTTTCCtgaagtggccgc	mmu-let-7c-5p	TGAGGTAGTAGGTTGTATGGTT	5'	Yes	gp1a	...((.((((((((..((..((..((((((((((((((((..((((...))))(((...)))..))))))))))))))))..))..))..))).)))))))......	98	51.4	-47.7	46947.7	102993	59744.8	121435	120011	141143	85765.5	100035	65170.2	100964	98155.3	107257	high
12	20	mmu-let-7a-1-3p	CTATACAATCTACTGTCTTTCC	22	chr15	+	85706598	85706704	gactgacggcctttggggTGAGGTAGTAGGTTGTATGGTTttgggctctgccccgctctgcggtaaCTATACAATCTACTGTCTTTCCtgaagtggccgcaatatct	24	mmu-let-7c-2,rno-let-7c-2,cpo-let-7a-3,cgr-let-7c-2,hsa-let-7a-3,bta-let-7a-3,ppy-let-7a-3,mml-let-7a-3,eca-let-7a-2,ptr-let-7a-3,cfa-let-7a-1,ggo-let-7a,pal-let-7a-1,ppa-let-7a-1,nle-let-7a-1,dma-let-7a-1,ocu-let-7a-3,chi-let-7a,mmr-let-7a-1,gga-let-7a-3,aca-let-7a-3,cli-let-7a-3,tgu-let-7a-1,xtr-let-7e-2,	mmu-let-7c-2	acggcctttggggTGAGGTAGTAGGTTGTATGGTTttgggctctgccccgctctgcggtaaCTATACAATCTACTGTCTTTCCtgaagtggccgc	mmu-let-7a-1-3p	CTATACAATCTACTGTCTTTCC	3'	Yes	gp1a	...((.((((((((..((..((..((((((((((((((((..((((...))))(((...)))..))))))))))))))))..))..))..))).)))))))......	98	51.4	-47.7	33.3333	55.6667	62	28.6667	38.6667	50	60.8944	54.068	67.6302	23.8342	31.6249	37.9957	middle
13	21	mmu-let-7g-5p	TGAGGTAGTAGTTTGTACAGTT	22	chr9	+	106178817	106178953	gctccgttctcttttgcctgattccaggcTGAGGTAGTAGTTTGTACAGTTtgagggtctatgataccacccggtacaggagataaCTGTACAGGCCACTGCCTTGCCaggaacagtgcaccagctaccaaatgggg	32	mmu-let-7g,rno-let-7g,eca-let-7g,cpo-let-7g,mmr-let-7g,cgr-let-7g,hsa-let-7g,ppy-let-7g,mml-let-7g,bta-let-7g,ptr-let-7g,mdo-let-7g,oar-let-7g,gga-let-7g,cja-let-7g,cfa-let-7g,pal-let-7g,dno-let-7g,ocu-let-7g,tch-let-7g,ppa-let-7g,nle-let-7g,dma-let-7g,ssc-let-7g,ggo-let-7g,chi-let-7g,oga-let-7g,aca-let-7g,cli-let-7g,tgu-let-7g-2,tgu-let-7g-1,xtr-let-7g,	mmu-let-7g	ccaggcTGAGGTAGTAGTTTGTACAGTTtgagggtctatgataccacccggtacaggagataACTGTACAGGCCACTGCCTTGCcagg	mmu-let-7g-5p	TGAGGTAGTAGTTTGTACAGTT	5'	Yes	gp1a	.(((((((..((..((((((.((((.(((.((((((((.(..(((((((((.....((((.((.((((....))))))..)))))))))))))..).))))))))))).))))))).)))..))......)))))))	136	51.8	-56	80669.9	148561	77044.6	219067	166607	143787	147370	144294	84041	182138	136265	109265	high
13	22	mmu-let-7g-3p_L-1R+1	CTGTACAGGCCACTGCCTTGCT	22	chr9	+	106178817	106178953	gctccgttctcttttgcctgattccaggcTGAGGTAGTAGTTTGTACAGTTtgagggtctatgataccacccggtacaggagataaCTGTACAGGCCACTGCCTTGCCaggaacagtgcaccagctaccaaatgggg	32	mmu-let-7g,rno-let-7g,eca-let-7g,cpo-let-7g,mmr-let-7g,cgr-let-7g,hsa-let-7g,ppy-let-7g,mml-let-7g,bta-let-7g,ptr-let-7g,mdo-let-7g,oar-let-7g,gga-let-7g,cja-let-7g,cfa-let-7g,pal-let-7g,dno-let-7g,ocu-let-7g,tch-let-7g,ppa-let-7g,nle-let-7g,dma-let-7g,ssc-let-7g,ggo-let-7g,chi-let-7g,oga-let-7g,aca-let-7g,cli-let-7g,tgu-let-7g-2,tgu-let-7g-1,xtr-let-7g,	mmu-let-7g	ccaggcTGAGGTAGTAGTTTGTACAGTTtgagggtctatgataccacccggtacaggagataACTGTACAGGCCACTGCCTTGCcagg	mmu-let-7g-3p	ACTGTACAGGCCACTGCCTTGC	3'	Diff	gp1a	.(((((((..((..((((((.((((.(((.((((((((.(..(((((((((.....((((.((.((((....))))))..)))))))))))))..).))))))))))).))))))).)))..))......)))))))	136	51.8	-56	0	16	39	22	23	17	0	15.5405	42.5416	18.2913	18.8114	12.9185	middle
14	23	mmu-miR-7a-5p_R+1	TGGAAGACTAGTGATTTTGTTGTT	24	chr7	+	78888277	78888373	ggtcgggccagccccgttTGGAAGACTAGTGATTTTGTTGTTgtgtctctgtatccaacaacaagtcccagtctgccacatggtgctggtcatttca	9	mmu-mir-7a-2,rno-mir-7a-2,cpo-mir-7-2,eca-mir-7-1,cfa-mir-7-2,efu-mir-7a,ssc-mir-7-1,dno-mir-7-2,tch-mir-7-2,	mmu-mir-7a-2	ggtcgggccagccccgttTGGAAGACTAGTGATTTTGTTGTtgtgtctctgtatccaaCAACAAGTCCCAGTCTGCCACAtggtgctggtcatttca	mmu-miR-7a-5p	TGGAAGACTAGTGATTTTGTTGT	5'	Diff	gp1a	((...(((((((.((((.(((.(((((...((.((((((((((..(......)..))))))))))))..))))).))).)))).)))))))...)).	96	50.5	-40.3	1619.5	1268	1441	3258.5	2259	3197	2958.56	1231.58	1571.86	2709.2	1847.6	2429.45	middle
15	24	mmu-let-7k_R+1_1ss9GT	TGAGGTAGTAGGTTGTGTGC	20	chr5	-	147283189	147283298	tagccacagccctaaccctagccTGAGGTAGGAGGTTGTGTGCaagctcaccactaacctatagtacacagagagcctttatcccacaacacaacacaaaacaatacttc	1	mmu-let-7k,	mmu-let-7k	tagccacagccctaaccctagccTGAGGTAGGAGGTTGTGTGcaagctcaccactaacctatagtacacagagagcctttatcccacaacacaacacaaaacaatacttc	mmu-let-7k	TGAGGTAGGAGGTTGTGTG	5'	Diff	gp1a	..((((((((((..(((.........)))..).))))))).))..((((...((((.....)))).......))))..................................	41	47.3	-20.7	0	3	0	0	0	3	0	2.91384	0	0	0	2.27974	low
16	25	mmu-let-7a-5p_1ss19AG	TGAGGTAGTAGGTTGTATGGTT	22	chr9	+	41536702	41536823	tccagccattgtgactgcatgttcccaggtTGAGGTAGTAGGTTGTATAGTTtagagttacatcaagggagataaCTGTACAGCCTCCTAGCTTTCCttgggacttgcacaaagcaacatgg	32	mmu-let-7a-2,rno-let-7a-2,cpo-let-7a-2,ppa-let-7a-2,nle-let-7a-2,sbo-let-7a,cgr-let-7a-2,hsa-let-7a-2,bta-let-7a-2,eca-let-7a,ppy-let-7a-2,ptr-let-7a-2,mdo-let-7a-2,mml-let-7a-2,cja-let-7a-1,cfa-let-7a-2,ssc-let-7a-1,pal-let-7a-2,dno-let-7c-2,ocu-let-7a-2,oga-let-7a-2,mmr-let-7a-2,dma-let-7a-2,gga-let-7a-2,oni-let-7a-5,gmo-let-7a-1,dre-let-7a-2,cli-let-7a-2,tgu-let-7a-2,ccr-let-7a,tni-let-7a-1,fr…	mmu-let-7a-2	ctgcatgttcccaggtTGAGGTAGTAGGTTGTATAGTTtagagttacatcaagggagataaCTGTACAGCCTCCTAGCTTTCcttgggacttgcac	mmu-let-7a-5p	TGAGGTAGTAGGTTGTATAGTT	5'	Diff	gp1a	.(((....((((...((((.(.(((((((..(((.(((.(((((((((((((.........(((......)))))))))))))))).))).)))..)))))))).))))....))))..)))	121	45.9	-45.6	46947.7	102993	59744.8	121435	120011	141143	85765.5	100035	65170.2	100964	98155.3	107257	high
16	26	mmu-let-7a-2-3p_R+1	CTGTACAGCCTCCTAGCTTTCC	22	chr9	+	41536702	41536823	tccagccattgtgactgcatgttcccaggtTGAGGTAGTAGGTTGTATAGTTtagagttacatcaagggagataaCTGTACAGCCTCCTAGCTTTCCttgggacttgcacaaagcaacatgg	32	mmu-let-7a-2,rno-let-7a-2,cpo-let-7a-2,ppa-let-7a-2,nle-let-7a-2,sbo-let-7a,cgr-let-7a-2,hsa-let-7a-2,bta-let-7a-2,eca-let-7a,ppy-let-7a-2,ptr-let-7a-2,mdo-let-7a-2,mml-let-7a-2,cja-let-7a-1,cfa-let-7a-2,ssc-let-7a-1,pal-let-7a-2,dno-let-7c-2,ocu-let-7a-2,oga-let-7a-2,mmr-let-7a-2,dma-let-7a-2,gga-let-7a-2,oni-let-7a-5,gmo-let-7a-1,dre-let-7a-2,cli-let-7a-2,tgu-let-7a-2,ccr-let-7a,tni-let-7a-1,fr…	mmu-let-7a-2	ctgcatgttcccaggtTGAGGTAGTAGGTTGTATAGTTtagagttacatcaagggagataaCTGTACAGCCTCCTAGCTTTCcttgggacttgcac	mmu-let-7a-2-3p	CTGTACAGCCTCCTAGCTTTC	3'	Diff	gp1a	.(((....((((...((((.(.(((((((..(((.(((.(((((((((((((.........(((......)))))))))))))))).))).)))..)))))))).))))....))))..)))	121	45.9	-45.6	16	11	6	8	11	22	29.2293	10.6841	6.54486	6.6514	8.99674	16.7181	middle
17	27	mmu-miR-7a-5p_R+1	TGGAAGACTAGTGATTTTGTTGTT	24	chr13	-	58392776	58392920	ttatacagagcctgtagaaaatgtagaagagacattggatgttggcctagttctgtgTGGAAGACTAGTGATTTTGTTGTTtttagataactaaaacgaCAACAAATCACAGTCTGCCATAtggcacaggccacctctacaggac	34	mmu-mir-7a-1,rno-mir-7a-1,cpo-mir-7-1,cfa-mir-7-1,ocu-mir-7a,tch-mir-7-4,tch-mir-7-3,hsa-mir-7-1,ppy-mir-7-1,ggo-mir-7-1,ppa-mir-7-1,lla-mir-7,bta-mir-7-2,eca-mir-7-3,ptr-mir-7-1,mdo-mir-7,mml-mir-7-1,mne-mir-7-1,cja-mir-7,efu-mir-7b,ssc-mir-7-2,aja-mir-7,pal-mir-7b-1,dno-mir-7-1,chi-mir-7,sha-mir-7,sla-mir-7,gga-mir-7-1,oni-mir-7-1,gmo-mir-7a-1,aca-mir-7-2,cli-mir-7a-1,tgu-mir-7-1,xtr-mir-7-1,	mmu-mir-7a-1	ttggatgttggcctagttctgtgTGGAAGACTAGTGATTTTGTTGTttttagataactaaaacgaCAACAAATCACAGTCTGCCATAtggcacaggccacctctacag	mmu-miR-7a-5p	TGGAAGACTAGTGATTTTGTTGT	5'	Diff	gp1a	..........((((((((.(((((.......)))))......((((((.((.(..(((((.(((((.((((.((((((((((((((....)))))..)))))))))))))))))).)))))..).))))))))..))))))))..	91	40.7	-58.1	1619.5	1268	1441	3258.5	2259	3197	2958.56	1231.58	1571.86	2709.2	1847.6	2429.45	middle
17	28	mmu-miR-7a-1-3p	CAACAAATCACAGTCTGCCATA	22	chr13	-	58392776	58392920	ttatacagagcctgtagaaaatgtagaagagacattggatgttggcctagttctgtgTGGAAGACTAGTGATTTTGTTGTTtttagataactaaaacgaCAACAAATCACAGTCTGCCATAtggcacaggccacctctacaggac	34	mmu-mir-7a-1,rno-mir-7a-1,cpo-mir-7-1,cfa-mir-7-1,ocu-mir-7a,tch-mir-7-4,tch-mir-7-3,hsa-mir-7-1,ppy-mir-7-1,ggo-mir-7-1,ppa-mir-7-1,lla-mir-7,bta-mir-7-2,eca-mir-7-3,ptr-mir-7-1,mdo-mir-7,mml-mir-7-1,mne-mir-7-1,cja-mir-7,efu-mir-7b,ssc-mir-7-2,aja-mir-7,pal-mir-7b-1,dno-mir-7-1,chi-mir-7,sha-mir-7,sla-mir-7,gga-mir-7-1,oni-mir-7-1,gmo-mir-7a-1,aca-mir-7-2,cli-mir-7a-1,tgu-mir-7-1,xtr-mir-7-1,	mmu-mir-7a-1	ttggatgttggcctagttctgtgTGGAAGACTAGTGATTTTGTTGTttttagataactaaaacgaCAACAAATCACAGTCTGCCATAtggcacaggccacctctacag	mmu-miR-7a-1-3p	CAACAAATCACAGTCTGCCATA	3'	Yes	gp1a	..........((((((((.(((((.......)))))......((((((.((.(..(((((.(((((.((((.((((((((((((((....)))))..)))))))))))))))))).)))))..).))))))))..))))))))..	91	40.7	-58.1	90	105	110	88	97	131	164.415	101.985	119.989	73.1653	79.3349	99.5488	middle
18	29	mmu-let-7a-5p	TGAGGTAGTAGGTTGTATAGTT	22	chr13	-	48538171	48538272	ttcactgtgggaTGAGGTAGTAGGTTGTATAGTTttagggtcacacccaccactgggagataaCTATACAATCTACTGTCTTTCCtaaggtgatggaaaagt	25	mmu-let-7a-1,rno-let-7a-1,cpo-let-7a-1,dno-let-7a,ocu-let-7a-1,cgr-let-7a-1,hsa-let-7a-1,bta-let-7a-1,ppy-let-7a-1,mml-let-7a-1,ptr-let-7a-1,mdo-let-7a-1,ssc-let-7a-2,oar-let-7a,gga-let-7a-1,oni-let-7a-4,oni-let-7a-2,gmo-let-7a-3,dre-let-7a-1,aca-let-7a,cli-let-7a-1,tgu-let-7a-3,xtr-let-7e-1,tni-let-7a-2,fru-let-7a-2,	mmu-let-7a-1	ttcactgtgggaTGAGGTAGTAGGTTGTATAGTTttagggtcacacccaccactgggagataaCTATACAATCTACTGTCTTTCCtaaggtgat	mmu-let-7a-5p	TGAGGTAGTAGGTTGTATAGTT	5'	Yes	gp1a	.((((..(((((.(((..((((((((((((((((...(((.....))).((....))....))))))))))))))))..))))))))..)))).........	92	42.2	-43.2	22011.8	41896.6	22056.4	52991.1	46999.5	53727.2	40211.9	40693.3	24059.4	44058.1	38440.2	40828.1	high
18	30	mmu-let-7a-1-3p_1ss22CT	CTATACAATCTACTGTCTTTCT	22	chr13	-	48538171	48538272	ttcactgtgggaTGAGGTAGTAGGTTGTATAGTTttagggtcacacccaccactgggagataaCTATACAATCTACTGTCTTTCCtaaggtgatggaaaagt	25	mmu-let-7a-1,rno-let-7a-1,cpo-let-7a-1,dno-let-7a,ocu-let-7a-1,cgr-let-7a-1,hsa-let-7a-1,bta-let-7a-1,ppy-let-7a-1,mml-let-7a-1,ptr-let-7a-1,mdo-let-7a-1,ssc-let-7a-2,oar-let-7a,gga-let-7a-1,oni-let-7a-4,oni-let-7a-2,gmo-let-7a-3,dre-let-7a-1,aca-let-7a,cli-let-7a-1,tgu-let-7a-3,xtr-let-7e-1,tni-let-7a-2,fru-let-7a-2,	mmu-let-7a-1	ttcactgtgggaTGAGGTAGTAGGTTGTATAGTTttagggtcacacccaccactgggagataaCTATACAATCTACTGTCTTTCCtaaggtgat	mmu-let-7a-1-3p	CTATACAATCTACTGTCTTTCC	3'	Diff	gp1a	.((((..(((((.(((..((((((((((((((((...(((.....))).((....))....))))))))))))))))..))))))))..)))).........	92	42.2	-43.2	176.333	297.667	281	175.667	251.667	361	322.131	289.118	306.518	146.054	205.835	274.329	middle
19	31	mmu-miR-9-5p	TCTTTGGTTATCTAGCTGTATGA	23	chr13	+	83738804	83738894	agggaagcgagttgttaTCTTTGGTTATCTAGCTGTATGAgtgtattggtcttcATAAAGCTAGATAACCGAAAGTaaaaactccttcaag	40	mmu-mir-9-2,rno-mir-9a-2,hsa-mir-9-2,bta-mir-9-2,ptr-mir-9-2,mml-mir-9-2,ssc-mir-9-2,ggo-mir-9,mne-mir-9,age-mir-9,lla-mir-9,cpo-mir-9-2,cfa-mir-9-2,dno-mir-9-2,cgr-mir-9,eca-mir-9a-2,mdo-mir-9a-2,ppy-mir-9-2,cja-mir-9-2,efu-mir-9-3,pal-mir-9-1,tch-mir-9-1,ocu-mir-9-2,gga-mir-9-2,oni-mir-9a-4,gmo-mir-9-4,oni-mir-9a-6,oni-mir-9a-7,oni-mir-9a-2,gmo-mir-9-6,pol-mir-9b,gmo-mir-9-3,gmo-mir-9-5,dre-mir…	mmu-mir-9-2	gttgttaTCTTTGGTTATCTAGCTGTATGAgtgtattggtcttcATAAAGCTAGATAACCGAAAGTaaaaac	mmu-miR-9-5p	TCTTTGGTTATCTAGCTGTATGA	5'	Yes	gp1a	...((((.(((((.(((..(((((((((((((((.((((((..(....)..)))))).)))))))))))))))..))).)))))))))...	85	37.4	-40.1	28.6667	85.6667	28	68	128.667	47.6667	52.3692	83.2064	30.5427	56.5369	105.235	36.2226	middle
19	32	mmu-miR-9-3p	ATAAAGCTAGATAACCGAAAGT	22	chr13	+	83738804	83738894	agggaagcgagttgttaTCTTTGGTTATCTAGCTGTATGAgtgtattggtcttcATAAAGCTAGATAACCGAAAGTaaaaactccttcaag	40	mmu-mir-9-2,rno-mir-9a-2,hsa-mir-9-2,bta-mir-9-2,ptr-mir-9-2,mml-mir-9-2,ssc-mir-9-2,ggo-mir-9,mne-mir-9,age-mir-9,lla-mir-9,cpo-mir-9-2,cfa-mir-9-2,dno-mir-9-2,cgr-mir-9,eca-mir-9a-2,mdo-mir-9a-2,ppy-mir-9-2,cja-mir-9-2,efu-mir-9-3,pal-mir-9-1,tch-mir-9-1,ocu-mir-9-2,gga-mir-9-2,oni-mir-9a-4,gmo-mir-9-4,oni-mir-9a-6,oni-mir-9a-7,oni-mir-9a-2,gmo-mir-9-6,pol-mir-9b,gmo-mir-9-3,gmo-mir-9-5,dre-mir…	mmu-mir-9-2	gttgttaTCTTTGGTTATCTAGCTGTATGAgtgtattggtcttcATAAAGCTAGATAACCGAAAGTaaaaac	mmu-miR-9-3p	ATAAAGCTAGATAACCGAAAGT	3'	Yes	gp1a	...((((.(((((.(((..(((((((((((((((.((((((..(....)..)))))).)))))))))))))))..))).)))))))))...	85	37.4	-40.1	17.6667	53.6667	16	27	40.6667	24.6667	32.274	52.1254	17.453	22.4485	33.2607	18.7445	middle
20	33	mmu-miR-9-5p	TCTTTGGTTATCTAGCTGTATGA	23	chr3	+	88215598	88215692	cggggttggttgttaTCTTTGGTTATCTAGCTGTATGAgtggtgtggagtcttcATAAAGCTAGATAACCGAAAGTaaaaataaccccatacact	26	mmu-mir-9-1,rno-mir-9a-1,hsa-mir-9-1,ppy-mir-9-1,mml-mir-9-1,ssc-mir-9-1,cpo-mir-9-1,eca-mir-9a,ptr-mir-9-1,mdo-mir-9a-3,cja-mir-9-1,cfa-mir-9-1,dno-mir-9-1,ocu-mir-9-1,efu-mir-9-1,tch-mir-9-3,gga-mir-9-4,oni-mir-9a-3,oni-mir-9a-1,gmo-mir-9-2,gmo-mir-9-1,dre-mir-9-1,cli-mir-9-1,xtr-mir-9a-1,ola-mir-9a-1,fru-mir-9-1,	mmu-mir-9-1	cggggttggttgttaTCTTTGGTTATCTAGCTGTATGAgtggtgtggagtcttcATAAAGCTAGATAACCGAAAGTaaaaataacccca	mmu-miR-9-5p	TCTTTGGTTATCTAGCTGTATGA	5'	Yes	gp1a	.(((((((....(((..(((((((((((((((.((((((.((.......)))))))).)))))))))))))))..)))...))))))).......	87	40	-41.7	28.6667	85.6667	28	68	128.667	47.6667	52.3692	83.2064	30.5427	56.5369	105.235	36.2226	middle
20	34	mmu-miR-9-3p	ATAAAGCTAGATAACCGAAAGT	22	chr3	+	88215598	88215692	cggggttggttgttaTCTTTGGTTATCTAGCTGTATGAgtggtgtggagtcttcATAAAGCTAGATAACCGAAAGTaaaaataaccccatacact	26	mmu-mir-9-1,rno-mir-9a-1,hsa-mir-9-1,ppy-mir-9-1,mml-mir-9-1,ssc-mir-9-1,cpo-mir-9-1,eca-mir-9a,ptr-mir-9-1,mdo-mir-9a-3,cja-mir-9-1,cfa-mir-9-1,dno-mir-9-1,ocu-mir-9-1,efu-mir-9-1,tch-mir-9-3,gga-mir-9-4,oni-mir-9a-3,oni-mir-9a-1,gmo-mir-9-2,gmo-mir-9-1,dre-mir-9-1,cli-mir-9-1,xtr-mir-9a-1,ola-mir-9a-1,fru-mir-9-1,	mmu-mir-9-1	cggggttggttgttaTCTTTGGTTATCTAGCTGTATGAgtggtgtggagtcttcATAAAGCTAGATAACCGAAAGTaaaaataacccca	mmu-miR-9-3p	ATAAAGCTAGATAACCGAAAGT	3'	Yes	gp1a	.(((((((....(((..(((((((((((((((.((((((.((.......)))))))).)))))))))))))))..)))...))))))).......	87	40	-41.7	17.6667	53.6667	16	27	40.6667	24.6667	32.274	52.1254	17.453	22.4485	33.2607	18.7445	middle
21	35	mmu-miR-9-5p	TCTTTGGTTATCTAGCTGTATGA	23	chr7	+	79505264	79505353	ggaggcccgtttctcTCTTTGGTTATCTAGCTGTATGAgtgccacagagccgtcATAAAGCTAGATAACCGAAAGTagaaatgactctca	22	mmu-mir-9-3,bta-mir-9-1,ppy-mir-9-3,mml-mir-9-3,rno-mir-9a-3,cpo-mir-9-3,dno-mir-9-3,hsa-mir-9-3,mdo-mir-9a-1,cfa-mir-9-3,pal-mir-9-2,tch-mir-9-2,efu-mir-9-2,ssc-mir-9-3,chi-mir-9,gga-mir-9-3,oni-mir-9a-5,aca-mir-9-2,tgu-mir-9-1,xtr-mir-9-3,tni-mir-9-3,fru-mir-9-3,	mmu-mir-9-3	ggaggcccgtttctcTCTTTGGTTATCTAGCTGTATGAgtgccacagagccgtcATAAAGCTAGATAACCGAAAGTagaaatgactctca	mmu-miR-9-5p	TCTTTGGTTATCTAGCTGTATGA	5'	Yes	gp1a	.((((..(((((((((.(((((((((((((((.(((((..((......))..))))).))))))))))))))))).)))))))..)))).	88	45.6	-41.1	28.6667	85.6667	28	68	128.667	47.6667	52.3692	83.2064	30.5427	56.5369	105.235	36.2226	middle
21	36	mmu-miR-9-3p	ATAAAGCTAGATAACCGAAAGT	22	chr7	+	79505264	79505353	ggaggcccgtttctcTCTTTGGTTATCTAGCTGTATGAgtgccacagagccgtcATAAAGCTAGATAACCGAAAGTagaaatgactctca	22	mmu-mir-9-3,bta-mir-9-1,ppy-mir-9-3,mml-mir-9-3,rno-mir-9a-3,cpo-mir-9-3,dno-mir-9-3,hsa-mir-9-3,mdo-mir-9a-1,cfa-mir-9-3,pal-mir-9-2,tch-mir-9-2,efu-mir-9-2,ssc-mir-9-3,chi-mir-9,gga-mir-9-3,oni-mir-9a-5,aca-mir-9-2,tgu-mir-9-1,xtr-mir-9-3,tni-mir-9-3,fru-mir-9-3,	mmu-mir-9-3	ggaggcccgtttctcTCTTTGGTTATCTAGCTGTATGAgtgccacagagccgtcATAAAGCTAGATAACCGAAAGTagaaatgactctca	mmu-miR-9-3p	ATAAAGCTAGATAACCGAAAGT	3'	Yes	gp1a	.((((..(((((((((.(((((((((((((((.(((((..((......))..))))).))))))))))))))))).)))))))..)))).	88	45.6	-41.1	17.6667	53.6667	16	27	40.6667	24.6667	32.274	52.1254	17.453	22.4485	33.2607	18.7445	middle
22	37	mmu-miR-10a-5p_R-1	TACCCTGTAGATCCGAATTTGT	22	chr11	+	96317160	96317275	aagaagacctgtctgtcttctgtataTACCCTGTAGATCCGAATTTGTgtaaggaattttgtggtcaCAAATTCGTATCTAGGGGAATatgtagttgacataaacactccgctcat	30	mmu-mir-10a,rno-mir-10a,cpo-mir-10a,cgr-mir-10a,hsa-mir-10a,ggo-mir-10a,ppa-mir-10a,bta-mir-10a,oar-mir-10a,eca-mir-10a,ptr-mir-10a,mdo-mir-10a,ppy-mir-10a,mml-mir-10a,cja-mir-10a,cfa-mir-10a,pal-mir-10a,dno-mir-10a,ocu-mir-10a,sbo-mir-10a,ssc-mir-10a,chi-mir-10a,nle-mir-10a,oga-mir-10a,mmr-mir-10a,dma-mir-10a,age-mir-10a,sla-mir-10a,gga-mir-10a,cli-mir-10a,	mmu-mir-10a	gacctgtctgtcttctgtataTACCCTGTAGATCCGAATTTGTGtaaggaattttgtggtcaCAAATTCGTATCTAGGGGAATAtgtagttgacataaacactccgctca	mmu-miR-10a-5p	TACCCTGTAGATCCGAATTTGTG	5'	Diff	gp1a	.(((((((......))))))).(((((.((((.(((((.((((((((((................)))))))))).))))))))).)))))..(((......)))...........	69	38.8	-33.2	9548	16791	12567.5	18799	23561	18599	17442.6	16308.8	13708.8	15629.9	19270.2	14133.6	high
22	38	mmu-miR-10a-3p_R-1	CAAATTCGTATCTAGGGGAAT	21	chr11	+	96317160	96317275	aagaagacctgtctgtcttctgtataTACCCTGTAGATCCGAATTTGTgtaaggaattttgtggtcaCAAATTCGTATCTAGGGGAATatgtagttgacataaacactccgctcat	30	mmu-mir-10a,rno-mir-10a,cpo-mir-10a,cgr-mir-10a,hsa-mir-10a,ggo-mir-10a,ppa-mir-10a,bta-mir-10a,oar-mir-10a,eca-mir-10a,ptr-mir-10a,mdo-mir-10a,ppy-mir-10a,mml-mir-10a,cja-mir-10a,cfa-mir-10a,pal-mir-10a,dno-mir-10a,ocu-mir-10a,sbo-mir-10a,ssc-mir-10a,chi-mir-10a,nle-mir-10a,oga-mir-10a,mmr-mir-10a,dma-mir-10a,age-mir-10a,sla-mir-10a,gga-mir-10a,cli-mir-10a,	mmu-mir-10a	gacctgtctgtcttctgtataTACCCTGTAGATCCGAATTTGTGtaaggaattttgtggtcaCAAATTCGTATCTAGGGGAATAtgtagttgacataaacactccgctca	mmu-miR-10a-3p	CAAATTCGTATCTAGGGGAATA	3'	Diff	gp1a	.(((((((......))))))).(((((.((((.(((((.((((((((((................)))))))))).))))))))).)))))..(((......)))...........	69	38.8	-33.2	167	204	176	253	302	177	305.081	198.141	191.983	210.35	247.001	134.505	middle
23	39	mmu-miR-10b-5p_R-1	TACCCTGTAGAACCGAATTTGT	22	chr2	+	74726045	74726157	ggacccgaggttgtaacgttgtctatataTACCCTGTAGAACCGAATTTGTgtggtacccacatagtcACAGATTCGATTCTAGGGGAATatatggtcgatgcaaaaacttca	39	mmu-mir-10b,rno-mir-10b,cpo-mir-10b,dma-mir-10,cgr-mir-10b,hsa-mir-10b,ppa-mir-10b,bta-mir-10b,eca-mir-10b,ptr-mir-10b,mdo-mir-10b,ppy-mir-10b,mml-mir-10b,cja-mir-10b,cfa-mir-10b,efu-mir-10,ssc-mir-10b,ggo-mir-10b,pal-mir-10b,dno-mir-10b,ocu-mir-10b,chi-mir-10b,tch-mir-10b-1,tch-mir-10b-2,nle-mir-10b,oga-mir-10,mmr-mir-10,oar-mir-10b,mne-mir-10b,sbo-mir-10b,gga-mir-10b,gmo-mir-10a-1,aca-mir-10b,c…	mmu-mir-10b	tataTACCCTGTAGAACCGAATTTGTGtggtacccacatagtcaCAGATTCGATTCTAGGGGAATAta	mmu-miR-10b-5p	TACCCTGTAGAACCGAATTTGTG	5'	Diff	gp1a	......((((((....(((((.((((((((.((((.(((((.((((((((((..((......))...)))))))))).))))))))).)))))))).)))))....)))))).	106	42.5	-43.4	558	2247	1279.5	1470	4116	1980	1019.37	2182.47	1395.69	1222.19	3366.42	1504.63	middle
23	40	mmu-miR-10b-3p_L+1R-1	ACAGATTCGATTCTAGGGGAAT	22	chr2	+	74726045	74726157	ggacccgaggttgtaacgttgtctatataTACCCTGTAGAACCGAATTTGTgtggtacccacatagtcACAGATTCGATTCTAGGGGAATatatggtcgatgcaaaaacttca	39	mmu-mir-10b,rno-mir-10b,cpo-mir-10b,dma-mir-10,cgr-mir-10b,hsa-mir-10b,ppa-mir-10b,bta-mir-10b,eca-mir-10b,ptr-mir-10b,mdo-mir-10b,ppy-mir-10b,mml-mir-10b,cja-mir-10b,cfa-mir-10b,efu-mir-10,ssc-mir-10b,ggo-mir-10b,pal-mir-10b,dno-mir-10b,ocu-mir-10b,chi-mir-10b,tch-mir-10b-1,tch-mir-10b-2,nle-mir-10b,oga-mir-10,mmr-mir-10,oar-mir-10b,mne-mir-10b,sbo-mir-10b,gga-mir-10b,gmo-mir-10a-1,aca-mir-10b,c…	mmu-mir-10b	tataTACCCTGTAGAACCGAATTTGTGtggtacccacatagtcaCAGATTCGATTCTAGGGGAATAta	mmu-miR-10b-3p	CAGATTCGATTCTAGGGGAATA	3'	Diff	gp1a	......((((((....(((((.((((((((.((((.(((((.((((((((((..((......))...)))))))))).))))))))).)))))))).)))))....)))))).	106	42.5	-43.4	0	16	11	15	53	23	0	15.5405	11.9989	12.4714	43.3479	17.478	middle
24	41	mmu-miR-15a-5p	TAGCAGCACATAATGGTTTGTG	22	chr14	-	61632017	61632110	cccttggagtaaagTAGCAGCACATAATGGTTTGTGgatgttgaaaaggtgCAGGCCATACTGTGCTGCCTCAaaatacaaggacctgatcttc	29	mmu-mir-15a,rno-mir-15a,cpo-mir-15a,cgr-mir-15a,hsa-mir-15a,bta-mir-15a,ptr-mir-15a,ppy-mir-15a,mml-mir-15a,ggo-mir-15a,ppa-mir-15a,mne-mir-15a,age-mir-15a,lla-mir-15a,sla-mir-15a,lca-mir-15a,eca-mir-15a,mdo-mir-15a,cfa-mir-15a,dno-mir-15a,tch-mir-15a,nle-mir-15a,oga-mir-15a,mmr-mir-15a,ssc-mir-15a,ocu-mir-15a,chi-mir-15a,xtr-mir-15a,xla-mir-15a,	mmu-mir-15a	cccttggagtaaagTAGCAGCACATAATGGTTTGTGgatgttgaaaaggtgCAGGCCATACTGTGCTGCCTCAaaatacaagga	mmu-miR-15a-5p	TAGCAGCACATAATGGTTTGTG	5'	Yes	gp1a	.(((((..........((((((((..((((..(((...............)))..))))..)))))))).........)))))...........	53	45.7	-29	1096	2127	1543	1624	2228	2562	2002.21	2065.91	1683.12	1350.23	1822.25	1946.9	middle
24	42	mmu-miR-15a-3p_1ss22AT	CAGGCCATACTGTGCTGCCTCT	22	chr14	-	61632017	61632110	cccttggagtaaagTAGCAGCACATAATGGTTTGTGgatgttgaaaaggtgCAGGCCATACTGTGCTGCCTCAaaatacaaggacctgatcttc	29	mmu-mir-15a,rno-mir-15a,cpo-mir-15a,cgr-mir-15a,hsa-mir-15a,bta-mir-15a,ptr-mir-15a,ppy-mir-15a,mml-mir-15a,ggo-mir-15a,ppa-mir-15a,mne-mir-15a,age-mir-15a,lla-mir-15a,sla-mir-15a,lca-mir-15a,eca-mir-15a,mdo-mir-15a,cfa-mir-15a,dno-mir-15a,tch-mir-15a,nle-mir-15a,oga-mir-15a,mmr-mir-15a,ssc-mir-15a,ocu-mir-15a,chi-mir-15a,xtr-mir-15a,xla-mir-15a,	mmu-mir-15a	cccttggagtaaagTAGCAGCACATAATGGTTTGTGgatgttgaaaaggtgCAGGCCATACTGTGCTGCCTCAaaatacaagga	mmu-miR-15a-3p	CAGGCCATACTGTGCTGCCTCA	3'	Diff	gp1a	.(((((..........((((((((..((((..(((...............)))..))))..)))))))).........)))))...........	53	45.7	-29	32	33	107	104	78	95	58.4586	32.0523	116.717	86.4681	63.7951	72.1918	middle
25	43	mmu-miR-15b-5p	TAGCAGCACATCATGGTTTACA	22	chr3	+	69009756	69009853	ttggaaccttaaagtactgTAGCAGCACATCATGGTTTACAtactacagtcaagatgCGAATCATTATTTGCTGCTCTagaaatttaaggaaattcat	24	mmu-mir-15b,eca-mir-15b,rno-mir-15b,cgr-mir-15b,hsa-mir-15b,ptr-mir-15b,ppy-mir-15b,ggo-mir-15b,ppa-mir-15b,bta-mir-15b,mml-mir-15b,chi-mir-15b,mne-mir-15b,age-mir-15b,lla-mir-15b,cja-mir-15b,cfa-mir-15b,tch-mir-15b,efu-mir-15,ssc-mir-15b,pal-mir-15b,dno-mir-15b,nle-mir-15b,oga-mir-15b,	mmu-mir-15b	ctgTAGCAGCACATCATGGTTTACAtactacagtcaagatgCGAATCATTATTTGCTGCTCTAg	mmu-miR-15b-5p	TAGCAGCACATCATGGTTTACA	5'	Yes	gp1a	.((((.(((((((...((..(((((((.((.((((((..(((.((.......)))))..)))))).)).)))))))..))...)))))))...)))).	96	34.7	-29.1	3282	3802	4154	8986	14287	7862	5995.66	3692.81	4531.23	7471.18	11685.1	5974.44	high
25	44	mmu-miR-15b-3p_R-1	CGAATCATTATTTGCTGCTCT	21	chr3	+	69009756	69009853	ttggaaccttaaagtactgTAGCAGCACATCATGGTTTACAtactacagtcaagatgCGAATCATTATTTGCTGCTCTagaaatttaaggaaattcat	24	mmu-mir-15b,eca-mir-15b,rno-mir-15b,cgr-mir-15b,hsa-mir-15b,ptr-mir-15b,ppy-mir-15b,ggo-mir-15b,ppa-mir-15b,bta-mir-15b,mml-mir-15b,chi-mir-15b,mne-mir-15b,age-mir-15b,lla-mir-15b,cja-mir-15b,cfa-mir-15b,tch-mir-15b,efu-mir-15,ssc-mir-15b,pal-mir-15b,dno-mir-15b,nle-mir-15b,oga-mir-15b,	mmu-mir-15b	ctgTAGCAGCACATCATGGTTTACAtactacagtcaagatgCGAATCATTATTTGCTGCTCTAg	mmu-miR-15b-3p	CGAATCATTATTTGCTGCTCTA	3'	Diff	gp1a	.((((.(((((((...((..(((((((.((.((((((..(((.((.......)))))..)))))).)).)))))))..))...)))))))...)))).	96	34.7	-29.1	219	228	227	230	220	159	400.076	221.452	247.614	191.228	179.935	120.826	middle
26	45	mmu-miR-16-5p	TAGCAGCACGTAAATATTGGCG	22	chr14	-	61631880	61631972	atgtcagcggtgcctTAGCAGCACGTAAATATTGGCGttaagattctgaaattacctCCAGTATTGACTGTGCTGCTGAAgtaaggttggcaa	23	mmu-mir-16-1,cgr-mir-16,hsa-mir-16-1,ptr-mir-16-1,ppy-mir-16-1,mml-mir-16-1,cja-mir-16-1,ggo-mir-16,ppa-mir-16,mne-mir-16,age-mir-16,sla-mir-16,eca-mir-16-2,mdo-mir-16-1,cfa-mir-16-1,nle-mir-16-1,oga-mir-16-1,dma-mir-16,sbo-mir-16-1,efu-mir-16-1,ssc-mir-16-2,pal-mir-16-1,lla-mir-16,	mmu-mir-16-1	atgtcagcggtgcctTAGCAGCACGTAAATATTGGCGttaagattctgaaattacctCCAGTATTGACTGTGCTGCTGAagtaaggttggcaa	mmu-miR-16-5p	TAGCAGCACGTAAATATTGGCG	5'	Yes	gp1a	.(((((((..(((.((((((((((((.((((((((...(((..........)))...)))))))).)).)))))))))).)))..))))))).	91	44.1	-37.1	14652	22169	13712.5	16145	25376.2	23741	26766.8	21532.3	14957.7	13423.3	20754.8	18041.1	high
26	46	mmu-miR-16-1-3p_R+1	CCAGTATTGACTGTGCTGCTGAA	23	chr14	-	61631880	61631972	atgtcagcggtgcctTAGCAGCACGTAAATATTGGCGttaagattctgaaattacctCCAGTATTGACTGTGCTGCTGAAgtaaggttggcaa	23	mmu-mir-16-1,cgr-mir-16,hsa-mir-16-1,ptr-mir-16-1,ppy-mir-16-1,mml-mir-16-1,cja-mir-16-1,ggo-mir-16,ppa-mir-16,mne-mir-16,age-mir-16,sla-mir-16,eca-mir-16-2,mdo-mir-16-1,cfa-mir-16-1,nle-mir-16-1,oga-mir-16-1,dma-mir-16,sbo-mir-16-1,efu-mir-16-1,ssc-mir-16-2,pal-mir-16-1,lla-mir-16,	mmu-mir-16-1	atgtcagcggtgcctTAGCAGCACGTAAATATTGGCGttaagattctgaaattacctCCAGTATTGACTGTGCTGCTGAagtaaggttggcaa	mmu-miR-16-1-3p	CCAGTATTGACTGTGCTGCTGA	3'	Diff	gp1a	.(((((((..(((.((((((((((((.((((((((...(((..........)))...)))))))).)).)))))))))).)))..))))))).	91	44.1	-37.1	53	79	129	79	86	126	96.8221	76.7312	140.715	65.6825	70.3382	95.7492	middle
27	47	mmu-miR-16-5p	TAGCAGCACGTAAATATTGGCG	22	chr3	+	69009898	69009996	ctgacatgcttgttccactcTAGCAGCACGTAAATATTGGCGtagtgaaataaatattaaacACCAATATTATTGTGCTGCTTTagtgtgacagggata	23	mmu-mir-16-2,rno-mir-16,cpo-mir-16b,pal-mir-16-2,ocu-mir-16b,oga-mir-16-2,cgr-mir-16-2,hsa-mir-16-2,bta-mir-16b,eca-mir-16-1,ptr-mir-16-2,mdo-mir-16-2,ppy-mir-16-2,mml-mir-16-2,cja-mir-16-2,cfa-mir-16-2,efu-mir-16-2,ssc-mir-16-1,dno-mir-16b,chi-mir-16b,nle-mir-16-2,oar-mir-16b,sbo-mir-16-2,	mmu-mir-16-2	catgcttgttccactcTAGCAGCACGTAAATATTGGCGtagtgaaataaatattaaacACCAATATTATTGTGCTGCTTTagtgtgacagggata	mmu-miR-16-5p	TAGCAGCACGTAAATATTGGCG	5'	Yes	gp1a	.....((.(((((..((((..(((((((((..((((((((.((..(((........))).)).))))))))..)))))))))..))))..))))).)).	93	37.4	-38.4	14652	22169	13712.5	16145	25376.2	23741	26766.8	21532.3	14957.7	13423.3	20754.8	18041.1	high
27	48	mmu-miR-16-2-3p	ACCAATATTATTGTGCTGCTTT	22	chr3	+	69009898	69009996	ctgacatgcttgttccactcTAGCAGCACGTAAATATTGGCGtagtgaaataaatattaaacACCAATATTATTGTGCTGCTTTagtgtgacagggata	23	mmu-mir-16-2,rno-mir-16,cpo-mir-16b,pal-mir-16-2,ocu-mir-16b,oga-mir-16-2,cgr-mir-16-2,hsa-mir-16-2,bta-mir-16b,eca-mir-16-1,ptr-mir-16-2,mdo-mir-16-2,ppy-mir-16-2,mml-mir-16-2,cja-mir-16-2,cfa-mir-16-2,efu-mir-16-2,ssc-mir-16-1,dno-mir-16b,chi-mir-16b,nle-mir-16-2,oar-mir-16b,sbo-mir-16-2,	mmu-mir-16-2	catgcttgttccactcTAGCAGCACGTAAATATTGGCGtagtgaaataaatattaaacACCAATATTATTGTGCTGCTTTagtgtgacagggata	mmu-miR-16-2-3p	ACCAATATTATTGTGCTGCTTT	3'	Yes	gp1a	.....((.(((((..((((..(((((((((..((((((((.((..(((........))).)).))))))))..)))))))))..))))..))))).)).	93	37.4	-38.4	38	60	58	63	67	37	69.4196	58.2769	63.267	52.3797	54.7983	28.1168	middle
28	49	mmu-miR-17-5p	CAAAGTGCTTACAGTGCAGGTAG	23	chr14	+	115043671	115043757	gtcagaataatgtCAAAGTGCTTACAGTGCAGGTAGtgatgtgtgcatctACTGCAGTGAGGGCACTTGTAGCattatgctgacagc	37	mmu-mir-17,rno-mir-17-1,cpo-mir-17,cfa-mir-17,dno-mir-17,ocu-mir-17,cgr-mir-17,hsa-mir-17,bta-mir-17,ptr-mir-17,mml-mir-17,ggo-mir-17,ppa-mir-17,mne-mir-17,age-mir-17,lla-mir-17,sla-mir-17,lca-mir-17,eca-mir-17,mdo-mir-17,ppy-mir-17,cja-mir-17,efu-mir-17,ssc-mir-17,pal-mir-17,tch-mir-17,oga-mir-17,chi-mir-17,oar-mir-17,nle-mir-17,mmr-mir-17,gga-mir-17,aca-mir-17,cli-mir-17,tgu-mir-17a,xla-mir-17-…	mmu-mir-17	gtcagaataatgtCAAAGTGCTTACAGTGCAGGTAGtgatgtgtgcatctACTGCAGTGAGGGCACTTGTAGcattatgctgac	mmu-miR-17-5p	CAAAGTGCTTACAGTGCAGGTAG	5'	Yes	gp1a	(((((.(((((((..(((((((..((.(((((.....((((....))))..))))).))..)))))))...))))))).)))))...	84	46	-40.8	6167	6164	7449	9981	7107	10073	11266.1	5986.98	8125.45	8298.45	5812.71	7654.62	high
28	50	mmu-miR-17-3p_R+1	ACTGCAGTGAGGGCACTTGTAGA	23	chr14	+	115043671	115043757	gtcagaataatgtCAAAGTGCTTACAGTGCAGGTAGtgatgtgtgcatctACTGCAGTGAGGGCACTTGTAGCattatgctgacagc	37	mmu-mir-17,rno-mir-17-1,cpo-mir-17,cfa-mir-17,dno-mir-17,ocu-mir-17,cgr-mir-17,hsa-mir-17,bta-mir-17,ptr-mir-17,mml-mir-17,ggo-mir-17,ppa-mir-17,mne-mir-17,age-mir-17,lla-mir-17,sla-mir-17,lca-mir-17,eca-mir-17,mdo-mir-17,ppy-mir-17,cja-mir-17,efu-mir-17,ssc-mir-17,pal-mir-17,tch-mir-17,oga-mir-17,chi-mir-17,oar-mir-17,nle-mir-17,mmr-mir-17,gga-mir-17,aca-mir-17,cli-mir-17,tgu-mir-17a,xla-mir-17-…	mmu-mir-17	gtcagaataatgtCAAAGTGCTTACAGTGCAGGTAGtgatgtgtgcatctACTGCAGTGAGGGCACTTGTAGcattatgctgac	mmu-miR-17-3p	ACTGCAGTGAGGGCACTTGTAG	3'	Diff	gp1a	(((((.(((((((..(((((((..((.(((((.....((((....))))..))))).))..)))))))...))))))).)))))...	84	46	-40.8	359	431	784	801	685	606	655.833	418.622	855.195	665.971	560.252	460.508	middle
29	51	mmu-miR-18a-5p	TAAGGTGCATCTAGTGCAGATAG	23	chr14	+	115043847	115043946	gtgctgcgtgctttttgttcTAAGGTGCATCTAGTGCAGATAGtgaagtagactagcatctACTGCCCTAAGTGCTCCTTCTGGcataagaagttatgtc	41	mmu-mir-18a,rno-mir-18a,cpo-mir-18a,dno-mir-18a,ocu-mir-18a,cgr-mir-18a,hsa-mir-18a,bta-mir-18a,ptr-mir-18a,ppy-mir-18a,mml-mir-18a,ggo-mir-18a,ppa-mir-18,mne-mir-18,age-mir-18,lla-mir-18,sla-mir-18,lca-mir-18,eca-mir-18a,oga-mir-18,mdo-mir-18a,cfa-mir-18a,ssc-mir-18a,efu-mir-18,pal-mir-18a,chi-mir-18a,mmr-mir-18,gga-mir-18a,oni-mir-18a-1,oni-mir-18a-2,gmo-mir-18a-1,gmo-mir-18a-2,dre-mir-18a,aca-…	mmu-mir-18a	tgcgtgctttttgttcTAAGGTGCATCTAGTGCAGATAGtgaagtagactagcatctACTGCCCTAAGTGCTCCTTCTGgcataagaagttatgtc	mmu-miR-18a-5p	TAAGGTGCATCTAGTGCAGATAG	5'	Yes	gp1a	.....(((((((((((((.((((((.(((..(((.((((.(((((.((....))..)).))))))).)))..))).)))..))).))))))))).)))).	94	45	-31.2	257	244	308	222	165	268	469.496	236.993	335.97	184.576	134.951	203.657	middle
29	52	mmu-miR-18a-3p_R+1	ACTGCCCTAAGTGCTCCTTCTGG	23	chr14	+	115043847	115043946	gtgctgcgtgctttttgttcTAAGGTGCATCTAGTGCAGATAGtgaagtagactagcatctACTGCCCTAAGTGCTCCTTCTGGcataagaagttatgtc	41	mmu-mir-18a,rno-mir-18a,cpo-mir-18a,dno-mir-18a,ocu-mir-18a,cgr-mir-18a,hsa-mir-18a,bta-mir-18a,ptr-mir-18a,ppy-mir-18a,mml-mir-18a,ggo-mir-18a,ppa-mir-18,mne-mir-18,age-mir-18,lla-mir-18,sla-mir-18,lca-mir-18,eca-mir-18a,oga-mir-18,mdo-mir-18a,cfa-mir-18a,ssc-mir-18a,efu-mir-18,pal-mir-18a,chi-mir-18a,mmr-mir-18,gga-mir-18a,oni-mir-18a-1,oni-mir-18a-2,gmo-mir-18a-1,gmo-mir-18a-2,dre-mir-18a,aca-…	mmu-mir-18a	tgcgtgctttttgttcTAAGGTGCATCTAGTGCAGATAGtgaagtagactagcatctACTGCCCTAAGTGCTCCTTCTGgcataagaagttatgtc	mmu-miR-18a-3p	ACTGCCCTAAGTGCTCCTTCTG	3'	Diff	gp1a	.....(((((((((((((.((((((.(((..(((.((((.(((((.((....))..)).))))))).)))..))).)))..))).))))))))).)))).	94	45	-31.2	49	54	103	94	84	123	89.5148	52.4492	112.353	78.1539	68.7024	93.4694	middle
30	53	mmu-miR-18b-5p	TAAGGTGCATCTAGTGCTGTTAG	23	chrX	-	52742331	52742413	tctcttgtgtTAAGGTGCATCTAGTGCTGTTAGtgaagcagcttacaatctactgccctaaatgccccttctcgcacaggcta	1	mmu-mir-18b,	mmu-mir-18b	tctcttgtgtTAAGGTGCATCTAGTGCTGTTAGtgaagcagcttacaatcTACTGCCCTAAATGCCCCTTCTcgcacaggcta	mmu-miR-18b-5p	TAAGGTGCATCTAGTGCTGTTAG	5'	Yes	gp1a	...(((((((.((((.((((.(((.((((((.....))))))...((......))..))).)))).))))...)))))))...	77	47	-23.6	11	14	11	18	10	5	20.0952	13.5979	11.9989	14.9656	8.17885	3.79957	middle
31	54	mmu-miR-19b-3p	TGTGCAAATCCATGCAAAACTGA	23	chrX	-	52741977	52742075	gacattgctacttacgattagttttgcagatttgcagttcagcgtatatgtgaatatatggcTGTGCAAATCCATGCAAAACTGAttgtgggaatgtgt	26	mmu-mir-19b-2,rno-mir-19b-2,cpo-mir-19b-2,hsa-mir-19b-2,ppy-mir-19b-2,mml-mir-19b-2,ggo-mir-19b-2,ppa-mir-19b-2,mne-mir-19b-2,bta-mir-19b-2,eca-mir-19b-2,ptr-mir-19b-2,cja-mir-19b-2,cfa-mir-19b-2,efu-mir-19,ssc-mir-19b-2,pal-mir-19-1,ocu-mir-19b-2,tch-mir-19b-2,nle-mir-19b,oga-mir-19b-2,mmr-mir-19b-2,dma-mir-19b-2,age-mir-19b-2,lla-mir-19b-2,sla-mir-19b-2,	mmu-mir-19b-2	acttacgattAGTTTTGCAGATTTGCAGTTCAGCgtatatgtgaatatatggcTGTGCAAATCCATGCAAAACTGAttgtggga	mmu-miR-19b-3p	TGTGCAAATCCATGCAAAACTGA	3'	Yes	gp1a	.(((((.((((....(((((((((((((((((((((...((((((((((....)))))).))))))))))))..))))))))))))))))).)))))..	96	38.4	-41.6	308.5	366	640.5	185	381	733.5	563.578	355.489	698.664	153.814	311.614	557.397	middle
32	55	mmu-miR-19b-1-5p	AGTTTTGCAGGTTTGCATCCAGC	23	chr14	+	115044304	115044397	gcactggtctatggttAGTTTTGCAGGTTTGCATCCAGCtgtataatattctgcTGTGCAAATCCATGCAAAACTGActgtggtggtgaaaagt	36	mmu-mir-19b-1,rno-mir-19b-1,cpo-mir-19b-1,pal-mir-19-2,dno-mir-19b-1,ocu-mir-19b-1,tch-mir-19b-1,cgr-mir-19b,hsa-mir-19b-1,bta-mir-19b,ptr-mir-19b-1,ppy-mir-19b-1,mml-mir-19b-1,ggo-mir-19b-1,chi-mir-19b,ppa-mir-19b-1,oar-mir-19b,mne-mir-19b-1,age-mir-19b-1,lla-mir-19b-1,sla-mir-19b-1,eca-mir-19b,mdo-mir-19b-1,cja-mir-19b-1,cfa-mir-19b-1,oga-mir-19b-1,mmr-mir-19b-1,dma-mir-19b-1,ssc-mir-19b-1,dno-…	mmu-mir-19b-1	cactggtctatggttAGTTTTGCAGGTTTGCATCCAGCtgtataatattctgcTGTGCAAATCCATGCAAAACTGActgtggtggtg	mmu-miR-19b-1-5p	AGTTTTGCAGGTTTGCATCCAGC	5'	Yes	gp1a	.((((...(((..((((((((((((((((((((..((((.............)))))))))).)).))))))))))))..))).))))......	87	42.6	-38.5	0	0	0	0	8	5	0	0	0	0	6.54308	3.79957	low
32	56	mmu-miR-19b-3p	TGTGCAAATCCATGCAAAACTGA	23	chr14	+	115044304	115044397	gcactggtctatggttAGTTTTGCAGGTTTGCATCCAGCtgtataatattctgcTGTGCAAATCCATGCAAAACTGActgtggtggtgaaaagt	36	mmu-mir-19b-1,rno-mir-19b-1,cpo-mir-19b-1,pal-mir-19-2,dno-mir-19b-1,ocu-mir-19b-1,tch-mir-19b-1,cgr-mir-19b,hsa-mir-19b-1,bta-mir-19b,ptr-mir-19b-1,ppy-mir-19b-1,mml-mir-19b-1,ggo-mir-19b-1,chi-mir-19b,ppa-mir-19b-1,oar-mir-19b,mne-mir-19b-1,age-mir-19b-1,lla-mir-19b-1,sla-mir-19b-1,eca-mir-19b,mdo-mir-19b-1,cja-mir-19b-1,cfa-mir-19b-1,oga-mir-19b-1,mmr-mir-19b-1,dma-mir-19b-1,ssc-mir-19b-1,dno-…	mmu-mir-19b-1	cactggtctatggttAGTTTTGCAGGTTTGCATCCAGCtgtataatattctgcTGTGCAAATCCATGCAAAACTGActgtggtggtg	mmu-miR-19b-3p	TGTGCAAATCCATGCAAAACTGA	3'	Yes	gp1a	.((((...(((..((((((((((((((((((((..((((.............)))))))))).)).))))))))))))..))).))))......	87	42.6	-38.5	308.5	366	640.5	185	381	733.5	563.578	355.489	698.664	153.814	311.614	557.397	middle
33	57	mmu-miR-19a-3p	TGTGCAAATCTATGCAAAACTGA	23	chr14	+	115043997	115044082	tttgcagccctctgttagttttgcatagttgcactacaagaagaatgtagtTGTGCAAATCTATGCAAAACTGAtggtggcctgct	38	mmu-mir-19a,rno-mir-19a,cpo-mir-19a,cja-mir-19a,cfa-mir-19a,dno-mir-19a,ocu-mir-19a,nle-mir-19a,cgr-mir-19a,hsa-mir-19a,bta-mir-19a,ptr-mir-19a,ppy-mir-19a,mml-mir-19a,ssc-mir-19a,ggo-mir-19a,chi-mir-19a,ppa-mir-19a,sla-mir-19a,lca-mir-19a,eca-mir-19a,mdo-mir-19a,tch-mir-19a,oga-mir-19a,mne-mir-19a,age-mir-19a,lla-mir-19a,gga-mir-19a,oni-mir-19a,gmo-mir-19a-1,gmo-mir-19a-2,dre-mir-19a,aca-mir-19a…	mmu-mir-19a	gcagccctctgtTAGTTTTGCATAGTTGCACTACaagaagaatgtagtTGTGCAAATCTATGCAAAACTGAtggtggcctgc	mmu-miR-19a-3p	TGTGCAAATCTATGCAAAACTGA	3'	Yes	gp1a	...((((.((.(..((((((((((((((((((((((((.......))))...))))))..))))))))))))))..).)).)))).	82	41.9	-40.2	56	64	159	47	54	229	102.303	62.162	173.439	39.0769	44.1658	174.02	middle
34	58	mmu-miR-20b-5p	CAAAGTGCTCATAGTGCAGGTAG	23	chrX	-	52742113	52742192	cctagtagtgcCAAAGTGCTCATAGTGCAGGTAGtttttataccactctACTGCAGTGTGAGCACTTCTAgtactcctgg	11	mmu-mir-20b,rno-mir-20b,cpo-mir-20b,eca-mir-20b,cgr-mir-20b,hsa-mir-20b,ppy-mir-20b,mml-mir-20b,pal-mir-20b,dno-mir-20b,ocu-mir-20b,	mmu-mir-20b	cctagtagtgcCAAAGTGCTCATAGTGCAGGTAGtttttataccactctACTGCAGTGTGAGCACTTCTAGtactcctgg	mmu-miR-20b-5p	CAAAGTGCTCATAGTGCAGGTAG	5'	Yes	gp1a	.((((.(((((..(((((((((((.(((((.(((.............)))))))).)))))))))))...))))).))))	79	46.2	-35.5	9	0	5	7	8	0	16.4415	0	5.45405	5.81997	6.54308	0	middle
34	59	mmu-miR-20b-3p_R-1_1ss21AG	ACTGCAGTGTGAGCACTTCTG	21	chrX	-	52742113	52742192	cctagtagtgcCAAAGTGCTCATAGTGCAGGTAGtttttataccactctACTGCAGTGTGAGCACTTCTAgtactcctgg	11	mmu-mir-20b,rno-mir-20b,cpo-mir-20b,eca-mir-20b,cgr-mir-20b,hsa-mir-20b,ppy-mir-20b,mml-mir-20b,pal-mir-20b,dno-mir-20b,ocu-mir-20b,	mmu-mir-20b	cctagtagtgcCAAAGTGCTCATAGTGCAGGTAGtttttataccactctACTGCAGTGTGAGCACTTCTAGtactcctgg	mmu-miR-20b-3p	ACTGCAGTGTGAGCACTTCTAG	3'	Diff	gp1a	.((((.(((((..(((((((((((.(((((.(((.............)))))))).)))))))))))...))))).))))	79	46.2	-35.5	15	14	14	25	18	8	27.4025	13.5979	15.2713	20.7856	14.7219	6.07931	middle
35	60	mmu-miR-20a-5p	TAAAGTGCTTATAGTGCAGGTAG	23	chr14	+	115044157	115044263	gtgtgatgtgacagcttctgtagcacTAAAGTGCTTATAGTGCAGGTAGtgtgtagccatctACTGCATTACGAGCACTTAAAGTactgccagctgtagaactccag	33	mmu-mir-20a,rno-mir-20a,cpo-mir-20a,cgr-mir-20a,hsa-mir-20a,bta-mir-20a,eca-mir-20a,ptr-mir-20a,ppy-mir-20a,mml-mir-20a,ssc-mir-20a,ggo-mir-20a,ppa-mir-20,mne-mir-20,age-mir-20,lla-mir-20,sla-mir-20,mdo-mir-20a,cja-mir-20a,cfa-mir-20a,efu-mir-20,pal-mir-20a,dno-mir-20a,ocu-mir-20a,tch-mir-20a,nle-mir-20,chi-mir-20a,mmr-mir-20,lca-mir-20,gga-mir-20a,aca-mir-20a,cli-mir-20a,tgu-mir-20a,	mmu-mir-20a	gtgtgatgtgacagcttctgtagcacTAAAGTGCTTATAGTGCAGGTAGtgtgtagccatctACTGCATTACGAGCACTTAAAGtactgccagctgtagaactccag	mmu-miR-20a-5p	TAAAGTGCTTATAGTGCAGGTAG	5'	Yes	gp1a	.((.((....((((((...((((.(((.(((((((..((((((((.(((.(((....))))))))))))))..)))))))..))).)))).)))))).....)))).	105	45.8	-39	5402	5899	7290	8383	5182	7987	9868.55	5729.59	7952.01	6969.83	4238.28	6069.43	high
35	61	mmu-miR-20a-3p_R+1	ACTGCATTACGAGCACTTAAAGT	23	chr14	+	115044157	115044263	gtgtgatgtgacagcttctgtagcacTAAAGTGCTTATAGTGCAGGTAGtgtgtagccatctACTGCATTACGAGCACTTAAAGTactgccagctgtagaactccag	33	mmu-mir-20a,rno-mir-20a,cpo-mir-20a,cgr-mir-20a,hsa-mir-20a,bta-mir-20a,eca-mir-20a,ptr-mir-20a,ppy-mir-20a,mml-mir-20a,ssc-mir-20a,ggo-mir-20a,ppa-mir-20,mne-mir-20,age-mir-20,lla-mir-20,sla-mir-20,mdo-mir-20a,cja-mir-20a,cfa-mir-20a,efu-mir-20,pal-mir-20a,dno-mir-20a,ocu-mir-20a,tch-mir-20a,nle-mir-20,chi-mir-20a,mmr-mir-20,lca-mir-20,gga-mir-20a,aca-mir-20a,cli-mir-20a,tgu-mir-20a,	mmu-mir-20a	gtgtgatgtgacagcttctgtagcacTAAAGTGCTTATAGTGCAGGTAGtgtgtagccatctACTGCATTACGAGCACTTAAAGtactgccagctgtagaactccag	mmu-miR-20a-3p	ACTGCATTACGAGCACTTAAAG	3'	Diff	gp1a	.((.((....((((((...((((.(((.(((((((..((((((((.(((.(((....))))))))))))))..)))))))..))).)))).)))))).....)))).	105	45.8	-39	9	29	17	12	28	11	16.4415	28.1672	18.5438	9.97709	22.9008	8.35906	middle
36	62	mmu-miR-21a-5p	TAGCTTATCAGACTGATGTTGA	22	chr11	-	86584066	86584158	tgtaccaccttgtcggaTAGCTTATCAGACTGATGTTGActgttgaatctcatggCAACAGCAGTCGATGGGCTGTCtgacattttggtatct	35	mmu-mir-21a,rno-mir-21,cgr-mir-21,ssc-mir-21,chi-mir-21,cpo-mir-21,cfa-mir-21,dno-mir-21,ocu-mir-21,tch-mir-21,sbo-mir-21,hsa-mir-21,ptr-mir-21,ppy-mir-21,mml-mir-21,ggo-mir-21,ppa-mir-21,mne-mir-21,age-mir-21,bta-mir-21,eca-mir-21,oar-mir-21,mdo-mir-21,cja-mir-21,efu-mir-21,pal-mir-21,nle-mir-21,oga-mir-21,mmr-mir-21,dma-mir-21,aja-mir-21,gga-mir-21,aca-mir-21,cli-mir-21,tgu-mir-21,	mmu-mir-21a	tgtaccaccttgtcggaTAGCTTATCAGACTGATGTTGActgttgaatctcatggCAACAGCAGTCGATGGGCTGTCtgacattttggtatc	mmu-miR-21a-5p	TAGCTTATCAGACTGATGTTGA	5'	Yes	gp1a	.((((((...(((((((((((..(((.(((((.(((((.(..(.(.....))..)))))).))))))))..)))))))))))...))))))..	90	45.2	-44.9	603303	1096368	960089	1212893	900236	1188325	1.10213e+06	1.06488e+06	1.04727e+06	1.00843e+06	736290	903025	high
36	63	mmu-miR-21a-3p	CAACAGCAGTCGATGGGCTGTC	22	chr11	-	86584066	86584158	tgtaccaccttgtcggaTAGCTTATCAGACTGATGTTGActgttgaatctcatggCAACAGCAGTCGATGGGCTGTCtgacattttggtatct	35	mmu-mir-21a,rno-mir-21,cgr-mir-21,ssc-mir-21,chi-mir-21,cpo-mir-21,cfa-mir-21,dno-mir-21,ocu-mir-21,tch-mir-21,sbo-mir-21,hsa-mir-21,ptr-mir-21,ppy-mir-21,mml-mir-21,ggo-mir-21,ppa-mir-21,mne-mir-21,age-mir-21,bta-mir-21,eca-mir-21,oar-mir-21,mdo-mir-21,cja-mir-21,efu-mir-21,pal-mir-21,nle-mir-21,oga-mir-21,mmr-mir-21,dma-mir-21,aja-mir-21,gga-mir-21,aca-mir-21,cli-mir-21,tgu-mir-21,	mmu-mir-21a	tgtaccaccttgtcggaTAGCTTATCAGACTGATGTTGActgttgaatctcatggCAACAGCAGTCGATGGGCTGTCtgacattttggtatc	mmu-miR-21a-3p	CAACAGCAGTCGATGGGCTGTC	3'	Yes	gp1a	.((((((...(((((((((((..(((.(((((.(((((.(..(.(.....))..)))))).))))))))..)))))))))))...))))))..	90	45.2	-44.9	165	281	254	506	296	250	301.427	272.93	277.066	420.701	242.094	189.979	middle
37	64	mmu-miR-22-5p_R-1	AGTTCTTCAGTGGCAAGCTTT	21	chr11	+	75463702	75463812	cctcccacaccctcacctggctgagccgcagtAGTTCTTCAGTGGCAAGCTTTatgtcctgacccagctaAAGCTGCCAGTTGAAGAACTGTtgccctctgcccctggctt	33	mmu-mir-22,aja-mir-22,rno-mir-22,cpo-mir-22,cfa-mir-22,pal-mir-22,dno-mir-22,ocu-mir-22,tch-mir-22,nle-mir-22,oga-mir-22,mmr-mir-22,dma-mir-22,cgr-mir-22,hsa-mir-22,bta-mir-22,eca-mir-22,ptr-mir-22,ppy-mir-22,mml-mir-22,ppa-mir-22,oar-mir-22,mne-mir-22,age-mir-22,lla-mir-22,lca-mir-22,cja-mir-22,sbo-mir-22,efu-mir-22,ssc-mir-22,ggo-mir-22,chi-mir-22,sla-mir-22,	mmu-mir-22	acctggctgagccgcagtAGTTCTTCAGTGGCAAGCTTTAtgtcctgacccagctaAAGCTGCCAGTTGAAGAACTGTtgccctctgcccctggc	mmu-miR-22-5p	AGTTCTTCAGTGGCAAGCTTTA	5'	Diff	gp1a	...............((.(((.(((..(((..(((((((((((((((.((((((.((.........))))))))))))).))))))))))..))).))).)))...))...	93	56.8	-41.4	764	1399	912	1154	1704	1629	1395.7	1358.82	994.819	959.464	1393.68	1237.9	middle
37	65	mmu-miR-22-3p	AAGCTGCCAGTTGAAGAACTGT	22	chr11	+	75463702	75463812	cctcccacaccctcacctggctgagccgcagtAGTTCTTCAGTGGCAAGCTTTatgtcctgacccagctaAAGCTGCCAGTTGAAGAACTGTtgccctctgcccctggctt	33	mmu-mir-22,aja-mir-22,rno-mir-22,cpo-mir-22,cfa-mir-22,pal-mir-22,dno-mir-22,ocu-mir-22,tch-mir-22,nle-mir-22,oga-mir-22,mmr-mir-22,dma-mir-22,cgr-mir-22,hsa-mir-22,bta-mir-22,eca-mir-22,ptr-mir-22,ppy-mir-22,mml-mir-22,ppa-mir-22,oar-mir-22,mne-mir-22,age-mir-22,lla-mir-22,lca-mir-22,cja-mir-22,sbo-mir-22,efu-mir-22,ssc-mir-22,ggo-mir-22,chi-mir-22,sla-mir-22,	mmu-mir-22	acctggctgagccgcagtAGTTCTTCAGTGGCAAGCTTTAtgtcctgacccagctaAAGCTGCCAGTTGAAGAACTGTtgccctctgcccctggc	mmu-miR-22-3p	AAGCTGCCAGTTGAAGAACTGT	3'	Yes	gp1a	...............((.(((.(((..(((..(((((((((((((((.((((((.((.........))))))))))))).))))))))))..))).))).)))...))...	93	56.8	-41.4	50859	116692	82299	144574	255866	135737	92910.9	113341	89772.6	120202	209269	103148	high
38	66	mmu-miR-23a-5p	GGGGTTCCTGGGGATGGGATTT	22	chr8	+	84208518	84208594	cggacggctGGGGTTCCTGGGGATGGGATTTgatgccagtcacaaATCACATTGCCAGGGATTTCCaactgaccctg	26	mmu-mir-23a,rno-mir-23a,cpo-mir-23a,cgr-mir-23a,hsa-mir-23a,ptr-mir-23a,ppy-mir-23a,mml-mir-23a,ggo-mir-23a,ppa-mir-23a,mne-mir-23a,bta-mir-23a,oar-mir-23a,eca-mir-23a,mdo-mir-23a,cja-mir-23a,oga-mir-23a,cfa-mir-23a,efu-mir-23a,ssc-mir-23a,pal-mir-23a,dno-mir-23a,chi-mir-23a,age-mir-23a,sla-mir-23a,lca-mir-23a,	mmu-mir-23a	cggacggctGGGGTTCCTGGGGATGGGATTTgatgccagtcacaaATCACATTGCCAGGGATTTCCaactgaccc	mmu-miR-23a-5p	GGGGTTCCTGGGGATGGGATTT	5'	Yes	gp1a	.((.(((..(..((((((((..(((.((((((.((.....)))))))).)))..))))))))..)...))).))...	73	55.8	-28.9	73	93	142	105	105	184	133.359	90.3291	154.895	87.2996	85.878	139.824	middle
38	67	mmu-miR-23a-3p	ATCACATTGCCAGGGATTTCC	21	chr8	+	84208518	84208594	cggacggctGGGGTTCCTGGGGATGGGATTTgatgccagtcacaaATCACATTGCCAGGGATTTCCaactgaccctg	26	mmu-mir-23a,rno-mir-23a,cpo-mir-23a,cgr-mir-23a,hsa-mir-23a,ptr-mir-23a,ppy-mir-23a,mml-mir-23a,ggo-mir-23a,ppa-mir-23a,mne-mir-23a,bta-mir-23a,oar-mir-23a,eca-mir-23a,mdo-mir-23a,cja-mir-23a,oga-mir-23a,cfa-mir-23a,efu-mir-23a,ssc-mir-23a,pal-mir-23a,dno-mir-23a,chi-mir-23a,age-mir-23a,sla-mir-23a,lca-mir-23a,	mmu-mir-23a	cggacggctGGGGTTCCTGGGGATGGGATTTgatgccagtcacaaATCACATTGCCAGGGATTTCCaactgaccc	mmu-miR-23a-3p	ATCACATTGCCAGGGATTTCC	3'	Yes	gp1a	.((.(((..(..((((((((..(((.((((((.((.....)))))))).)))..))))))))..)...))).))...	73	55.8	-28.9	36056.5	48102.5	45703	56638	84181.5	83435	65869.2	46721	49853.3	47090.2	68850.8	63403.4	high
39	68	mmu-miR-23b-5p	GGGTTCCTGGCATGCTGATTT	21	chr13	+	63300472	63300568	ctcacctgctctggctgcttGGGTTCCTGGCATGCTGATTTgtgacttgagattaaaATCACATTGCCAGGGATTACCacgcaaccatgaccttggc	35	mmu-mir-23b,rno-mir-23b,cpo-mir-23b,bta-mir-23b,dno-mir-23b,ocu-mir-23b,oar-mir-23b,cgr-mir-23b,hsa-mir-23b,ptr-mir-23b,ppy-mir-23b,mml-mir-23b,ppa-mir-23b,bta-mir-10174,eca-mir-23b,mdo-mir-23b,cja-mir-23b,cfa-mir-23b,efu-mir-23b,ssc-mir-23b,ggo-mir-23b,pal-mir-23b,chi-mir-23b,tch-mir-23b,nle-mir-23b,dma-mir-23b,oga-mir-23b,mmr-mir-23b,oni-mir-23b,gmo-mir-23b,aca-mir-23b,tgu-mir-23,xtr-mir-23b,xl…	mmu-mir-23b	ggctgcttGGGTTCCTGGCATGCTGATTTgtgacttgagattaaaATCACATTGCCAGGGATTACCacgcaacc	mmu-miR-23b-5p	GGGTTCCTGGCATGCTGATTT	5'	Yes	gp1a	....((...(((((.(((.(((((((((((((((.((((((..............)))))))).))))))))))..))).))).))).))....)).	92	50.5	-33.4	357	226	219	247	258	317	652.179	219.51	238.887	205.362	211.014	240.893	middle
39	69	mmu-miR-23b-3p	ATCACATTGCCAGGGATTACC	21	chr13	+	63300472	63300568	ctcacctgctctggctgcttGGGTTCCTGGCATGCTGATTTgtgacttgagattaaaATCACATTGCCAGGGATTACCacgcaaccatgaccttggc	35	mmu-mir-23b,rno-mir-23b,cpo-mir-23b,bta-mir-23b,dno-mir-23b,ocu-mir-23b,oar-mir-23b,cgr-mir-23b,hsa-mir-23b,ptr-mir-23b,ppy-mir-23b,mml-mir-23b,ppa-mir-23b,bta-mir-10174,eca-mir-23b,mdo-mir-23b,cja-mir-23b,cfa-mir-23b,efu-mir-23b,ssc-mir-23b,ggo-mir-23b,pal-mir-23b,chi-mir-23b,tch-mir-23b,nle-mir-23b,dma-mir-23b,oga-mir-23b,mmr-mir-23b,oni-mir-23b,gmo-mir-23b,aca-mir-23b,tgu-mir-23,xtr-mir-23b,xl…	mmu-mir-23b	ggctgcttGGGTTCCTGGCATGCTGATTTgtgacttgagattaaaATCACATTGCCAGGGATTACCacgcaacc	mmu-miR-23b-3p	ATCACATTGCCAGGGATTACC	3'	Yes	gp1a	....((...(((((.(((.(((((((((((((((.((((((..............)))))))).))))))))))..))).))).))).))....)).	92	50.5	-33.4	26117.5	33700.5	30959	39081	66608.5	58213	47712.3	32732.7	33770.4	32492.9	54478.1	44236.9	high
40	70	mmu-miR-24-2-5p	GTGCCTACTGAGCTGAAACAGT	22	chr8	+	84208815	84208921	gcctctctccgggctccgcctcccGTGCCTACTGAGCTGAAACAGTtgattccagtgcacTGGCTCAGTTCAGCAGGAACaggagtccagccccctaggagctggca	18	mmu-mir-24-2,rno-mir-24-2,cpo-mir-24-2,cgr-mir-24,hsa-mir-24-2,ptr-mir-24-2,ppy-mir-24-2,ggo-mir-24,ppa-mir-24-2,bta-mir-24-2,eca-mir-24-1,mdo-mir-24-2,mml-mir-24-2,mne-mir-24-2,cfa-mir-24-2,ssc-mir-24-1,ocu-mir-24-2,oga-mir-24-2,	mmu-mir-24-2	gcctctctccgggctccgcctcccGTGCCTACTGAGCTGAAACAGTtgattccagtgcacTGGCTCAGTTCAGCAGGAACAGgagtccagccccctaggagctggca	mmu-miR-24-2-5p	GTGCCTACTGAGCTGAAACAGT	5'	Yes	gp1a	(((...(((((((((....((((.((.(((.(((((((((..((((..((....))..))))..))))))))).))).)).))))...)))))....))))..))).	106	61.7	-48.9	3471	4218	2744	3797	4215	3623	6340.94	4096.86	2993.18	3156.92	3447.39	2753.17	middle
40	71	mmu-miR-24-3p_R-2	TGGCTCAGTTCAGCAGGAAC	20	chr8	+	84208815	84208921	gcctctctccgggctccgcctcccGTGCCTACTGAGCTGAAACAGTtgattccagtgcacTGGCTCAGTTCAGCAGGAACaggagtccagccccctaggagctggca	18	mmu-mir-24-2,rno-mir-24-2,cpo-mir-24-2,cgr-mir-24,hsa-mir-24-2,ptr-mir-24-2,ppy-mir-24-2,ggo-mir-24,ppa-mir-24-2,bta-mir-24-2,eca-mir-24-1,mdo-mir-24-2,mml-mir-24-2,mne-mir-24-2,cfa-mir-24-2,ssc-mir-24-1,ocu-mir-24-2,oga-mir-24-2,	mmu-mir-24-2	gcctctctccgggctccgcctcccGTGCCTACTGAGCTGAAACAGTtgattccagtgcacTGGCTCAGTTCAGCAGGAACAGgagtccagccccctaggagctggca	mmu-miR-24-3p	TGGCTCAGTTCAGCAGGAACAG	3'	Diff	gp1a	(((...(((((((((....((((.((.(((.(((((((((..((((..((....))..))))..))))))))).))).)).))))...)))))....))))..))).	106	61.7	-48.9	46081	69034.5	51653.5	88733.5	90349.5	86414	84182.3	67051.9	56344.2	73775.2	73895.5	65667.2	high
41	72	mmu-miR-24-1-5p_R-2	GTGCCTACTGAGCTGATATCA	21	chr13	+	63301198	63301284	tggacccgccctccgGTGCCTACTGAGCTGATATCAgttctcatttcacacacTGGCTCAGTTCAGCAGGAACaggagtcgagccct	31	mmu-mir-24-1,rno-mir-24-1,cgr-mir-24-1,cpo-mir-24-1,hsa-mir-24-1,bta-mir-24-1,eca-mir-24-2,ppy-mir-24-1,mml-mir-24-1,cja-mir-24-2,ppa-mir-24-1,mne-mir-24-1,ptr-mir-24-1,mdo-mir-24-1,cfa-mir-24-1,ssc-mir-24-2,chi-mir-24,dno-mir-24a,ocu-mir-24-1,nle-mir-24-1,mmr-mir-24,dma-mir-24,oga-mir-24-1,sbo-mir-24-2,gga-mir-24,gmo-mir-24a-3,aca-mir-24-2,xtr-mir-24a,xla-mir-24a-1,xla-mir-24a-2,tni-mir-24-1,	mmu-mir-24-1	ctccgGTGCCTACTGAGCTGATATCAGTtctcatttcacacacTGGCTCAGTTCAGCAGGAACAGgag	mmu-miR-24-1-5p	GTGCCTACTGAGCTGATATCAGT	5'	Diff	gp1a	.((...((..((((.((.(((.(((((((((..(((((.............))))).))))))))).))).)).)))).))..))..	84	56.3	-29.4	282	300	159	246	402	262	515.167	291.384	173.439	204.53	328.79	199.098	middle
41	73	mmu-miR-24-3p_R-2	TGGCTCAGTTCAGCAGGAAC	20	chr13	+	63301198	63301284	tggacccgccctccgGTGCCTACTGAGCTGATATCAgttctcatttcacacacTGGCTCAGTTCAGCAGGAACaggagtcgagccct	31	mmu-mir-24-1,rno-mir-24-1,cgr-mir-24-1,cpo-mir-24-1,hsa-mir-24-1,bta-mir-24-1,eca-mir-24-2,ppy-mir-24-1,mml-mir-24-1,cja-mir-24-2,ppa-mir-24-1,mne-mir-24-1,ptr-mir-24-1,mdo-mir-24-1,cfa-mir-24-1,ssc-mir-24-2,chi-mir-24,dno-mir-24a,ocu-mir-24-1,nle-mir-24-1,mmr-mir-24,dma-mir-24,oga-mir-24-1,sbo-mir-24-2,gga-mir-24,gmo-mir-24a-3,aca-mir-24-2,xtr-mir-24a,xla-mir-24a-1,xla-mir-24a-2,tni-mir-24-1,	mmu-mir-24-1	ctccgGTGCCTACTGAGCTGATATCAGTtctcatttcacacacTGGCTCAGTTCAGCAGGAACAGgag	mmu-miR-24-3p	TGGCTCAGTTCAGCAGGAACAG	3'	Diff	gp1a	.((...((..((((.((.(((.(((((((((..(((((.............))))).))))))))).))).)).)))).))..))..	84	56.3	-29.4	46081	69034.5	51653.5	88733.5	90349.5	86414	84182.3	67051.9	56344.2	73775.2	73895.5	65667.2	high
42	74	mmu-miR-25-5p_R+1	AGGCGGAGACTTGGGCAATTGCT	23	chr5	-	138165313	138165411	cgggactggccagtgttgagAGGCGGAGACTTGGGCAATTGCTggacgctgccctgggCATTGCACTTGTCTCGGTCTGAcagtgccggcccaacactg	31	mmu-mir-25,hsa-mir-25,eca-mir-25,ptr-mir-25,ppy-mir-25,mml-mir-25,ggo-mir-25,ppa-mir-25,mne-mir-25,lla-mir-25,aja-mir-25,rno-mir-25,cpo-mir-25,cja-mir-25,pal-mir-25,dno-mir-25,ocu-mir-25,tch-mir-25,nle-mir-25,oga-mir-25,dma-mir-25,cgr-mir-25,bta-mir-25,oar-mir-25,mdo-mir-25,cfa-mir-25,efu-mir-25,chi-mir-25,oni-mir-25,tni-mir-25,fru-mir-25,	mmu-mir-25	ggccagtgttgagAGGCGGAGACTTGGGCAATTGCtggacgctgccctgggCATTGCACTTGTCTCGGTCTGAcagtgccggcc	mmu-miR-25-5p	AGGCGGAGACTTGGGCAATTGC	5'	Diff	gp1a	.(((.((((.((.((((...((((.(((((..(((((((.(((((.......))..)))))))).)).))))).)))))))).))))))))).......	91	62.6	-41.3	159	125	183	308	174	213	290.466	121.41	199.618	256.079	142.312	161.862	middle
42	75	mmu-miR-25-3p	CATTGCACTTGTCTCGGTCTGA	22	chr5	-	138165313	138165411	cgggactggccagtgttgagAGGCGGAGACTTGGGCAATTGCTggacgctgccctgggCATTGCACTTGTCTCGGTCTGAcagtgccggcccaacactg	31	mmu-mir-25,hsa-mir-25,eca-mir-25,ptr-mir-25,ppy-mir-25,mml-mir-25,ggo-mir-25,ppa-mir-25,mne-mir-25,lla-mir-25,aja-mir-25,rno-mir-25,cpo-mir-25,cja-mir-25,pal-mir-25,dno-mir-25,ocu-mir-25,tch-mir-25,nle-mir-25,oga-mir-25,dma-mir-25,cgr-mir-25,bta-mir-25,oar-mir-25,mdo-mir-25,cfa-mir-25,efu-mir-25,chi-mir-25,oni-mir-25,tni-mir-25,fru-mir-25,	mmu-mir-25	ggccagtgttgagAGGCGGAGACTTGGGCAATTGCtggacgctgccctgggCATTGCACTTGTCTCGGTCTGAcagtgccggcc	mmu-miR-25-3p	CATTGCACTTGTCTCGGTCTGA	3'	Yes	gp1a	.(((.((((.((.((((...((((.(((((..(((((((.(((((.......))..)))))))).)).))))).)))))))).))))))))).......	91	62.6	-41.3	4029	5633	5267	9553	9277	7101	7360.31	5471.23	5745.3	7942.6	7587.52	5396.15	high
43	76	mmu-miR-26a-5p	TTCAAGTAATCCAGGATAGGCT	22	chr9	+	119031796	119031885	aaggccgtggcctcgTTCAAGTAATCCAGGATAGGCTgtgcaggtcccaaggggCCTATTCTTGGTTACTTGCACGgggacgcgggcctg	24	mmu-mir-26a-1,rno-mir-26a,cpo-mir-26a-1,cgr-mir-26a-1,hsa-mir-26a-1,ptr-mir-26a-1,ppy-mir-26a,mml-mir-26a-1,ggo-mir-26a,ppa-mir-26a,lla-mir-26a,bta-mir-26a-1,chi-mir-26a,eca-mir-26a-2,cfa-mir-26a-1,pal-mir-26a-1,nle-mir-26a-1,oga-mir-26a-1,mmr-mir-26a-1,dma-mir-26a-1,sbo-mir-26a-1,efu-mir-26a,dno-mir-26a-1,mne-mir-26a,	mmu-mir-26a-1	aaggccgtggcctcgTTCAAGTAATCCAGGATAGGCTgtgcaggtcccaaggggCCTATTCTTGGTTACTTGCACGgggacgcgggcctg	mmu-miR-26a-5p	TTCAAGTAATCCAGGATAGGCT	5'	Yes	gp1a	.((((((((.((((((.(((((((((.(((((((((.........((....))))))))))).))))))))).)))))).))))).))).	88	60	-48.4	38880.2	80943	60103	88183	94526.7	81445.5	71027.6	78618.4	65561	73317.5	77312	61891.6	high
43	77	mmu-miR-26a-1-3p	CCTATTCTTGGTTACTTGCACG	22	chr9	+	119031796	119031885	aaggccgtggcctcgTTCAAGTAATCCAGGATAGGCTgtgcaggtcccaaggggCCTATTCTTGGTTACTTGCACGgggacgcgggcctg	24	mmu-mir-26a-1,rno-mir-26a,cpo-mir-26a-1,cgr-mir-26a-1,hsa-mir-26a-1,ptr-mir-26a-1,ppy-mir-26a,mml-mir-26a-1,ggo-mir-26a,ppa-mir-26a,lla-mir-26a,bta-mir-26a-1,chi-mir-26a,eca-mir-26a-2,cfa-mir-26a-1,pal-mir-26a-1,nle-mir-26a-1,oga-mir-26a-1,mmr-mir-26a-1,dma-mir-26a-1,sbo-mir-26a-1,efu-mir-26a,dno-mir-26a-1,mne-mir-26a,	mmu-mir-26a-1	aaggccgtggcctcgTTCAAGTAATCCAGGATAGGCTgtgcaggtcccaaggggCCTATTCTTGGTTACTTGCACGgggacgcgggcctg	mmu-miR-26a-1-3p	CCTATTCTTGGTTACTTGCACG	3'	Yes	gp1a	.((((((((.((((((.(((((((((.(((((((((.........((....))))))))))).))))))))).)))))).))))).))).	88	60	-48.4	0	0	0	0	7	0	0	0	0	0	5.7252	0	low
44	78	mmu-miR-26b-5p_R+1	TTCAAGTAATTCAGGATAGGTT	22	chr1	+	74394309	74394417	ctgcccgggacccagTTCAAGTAATTCAGGATAGGTTgtggtgctgaccagCCTGTTCTCCATTACTTGGCTCgggggccggtgccctgcagccttggggtgagagggc	24	mmu-mir-26b,rno-mir-26b,cpo-mir-26b,ocu-mir-26b,cgr-mir-26b,hsa-mir-26b,ppy-mir-26b,mml-mir-26b,bta-mir-26b,oar-mir-26b,ptr-mir-26b,cja-mir-26b,cfa-mir-26b,tch-mir-26b,ppa-mir-26b,mmr-mir-26b,dma-mir-26b,efu-mir-26b,ssc-mir-26b,ggo-mir-26b,pal-mir-26b,dno-mir-26b,chi-mir-26b,oga-mir-26b,	mmu-mir-26b	tgcccgggacccagTTCAAGTAATTCAGGATAGGTtgtggtgctgaccagCCTGTTCTCCATTACTTGGCTCgggggccggtgcc	mmu-miR-26b-5p	TTCAAGTAATTCAGGATAGGT	5'	Diff	gp1a	....((((..(((((.(((((((((..(((((((((..((((....)))))))))))))..))))))))))).)))..)))).(((((...(((....)))...)))))	78	61.5	-51.8	18943.7	32092	21138	33940	42952.7	37326	34606.9	31170.4	23057.5	28218.5	35130.4	28364.6	high
44	79	mmu-miR-26b-3p	CCTGTTCTCCATTACTTGGCTC	22	chr1	+	74394309	74394417	ctgcccgggacccagTTCAAGTAATTCAGGATAGGTTgtggtgctgaccagCCTGTTCTCCATTACTTGGCTCgggggccggtgccctgcagccttggggtgagagggc	24	mmu-mir-26b,rno-mir-26b,cpo-mir-26b,ocu-mir-26b,cgr-mir-26b,hsa-mir-26b,ppy-mir-26b,mml-mir-26b,bta-mir-26b,oar-mir-26b,ptr-mir-26b,cja-mir-26b,cfa-mir-26b,tch-mir-26b,ppa-mir-26b,mmr-mir-26b,dma-mir-26b,efu-mir-26b,ssc-mir-26b,ggo-mir-26b,pal-mir-26b,dno-mir-26b,chi-mir-26b,oga-mir-26b,	mmu-mir-26b	tgcccgggacccagTTCAAGTAATTCAGGATAGGTtgtggtgctgaccagCCTGTTCTCCATTACTTGGCTCgggggccggtgcc	mmu-miR-26b-3p	CCTGTTCTCCATTACTTGGCTC	3'	Yes	gp1a	....((((..(((((.(((((((((..(((((((((..((((....)))))))))))))..))))))))))).)))..)))).(((((...(((....)))...)))))	78	61.5	-51.8	41	31	37	67	92	24	74.9001	30.1097	40.36	55.7054	75.2455	18.2379	middle
45	80	mmu-miR-26a-5p	TTCAAGTAATCCAGGATAGGCT	22	chr10	+	126995530	126995613	ggctgcggctggaTTCAAGTAATCCAGGATAGGCTgtgtccgtccatgaggCCTGTTCTTGATTACTTGTTTCtggaggcagcg	13	mmu-mir-26a-2,cgr-mir-26a-2,hsa-mir-26a-2,bta-mir-26a-2,eca-mir-26a,ppy-mir-26a-2,mml-mir-26a-2,cja-mir-26a-2,ssc-mir-26a,ptr-mir-26a-2,mdo-mir-26-1,efu-mir-26c,oar-mir-26a,	mmu-mir-26a-2	ggctgcggctggaTTCAAGTAATCCAGGATAGGCTgtgtccgtccatgaggCCTGTTCTTGATTACTTGTTTCtggaggcagcg	mmu-miR-26a-5p	TTCAAGTAATCCAGGATAGGCT	5'	Yes	gp1a	.(((((..(..((..(((((((((.(((((((((((((......)))..)))))))))).)))))))))..))..)..))))).	82	53.6	-44.9	38880.2	80943	60103	88183	94526.7	81445.5	71027.6	78618.4	65561	73317.5	77312	61891.6	high
45	81	mmu-miR-26a-2-3p	CCTGTTCTTGATTACTTGTTTC	22	chr10	+	126995530	126995613	ggctgcggctggaTTCAAGTAATCCAGGATAGGCTgtgtccgtccatgaggCCTGTTCTTGATTACTTGTTTCtggaggcagcg	13	mmu-mir-26a-2,cgr-mir-26a-2,hsa-mir-26a-2,bta-mir-26a-2,eca-mir-26a,ppy-mir-26a-2,mml-mir-26a-2,cja-mir-26a-2,ssc-mir-26a,ptr-mir-26a-2,mdo-mir-26-1,efu-mir-26c,oar-mir-26a,	mmu-mir-26a-2	ggctgcggctggaTTCAAGTAATCCAGGATAGGCTgtgtccgtccatgaggCCTGTTCTTGATTACTTGTTTCtggaggcagcg	mmu-miR-26a-2-3p	CCTGTTCTTGATTACTTGTTTC	3'	Yes	gp1a	.(((((..(..((..(((((((((.(((((((((((((......)))..)))))))))).)))))))))..))..)..))))).	82	53.6	-44.9	21	18	51	13	56	49	38.3635	17.4831	55.6313	10.8085	45.8016	37.2358	middle
46	82	mmu-miR-27b-5p	AGAGCTTAGCTGATTGGTGAAC	22	chr13	+	63300661	63300812	cgaagatgctcaccagccctttaattatggccggcgatgacctctctaacaaggtgcAGAGCTTAGCTGATTGGTGAACagtgattggtttccgctttgTTCACAGTGGCTAAGTTCTGCacctgaagagaaggtgagatggggacagttaa	38	mmu-mir-27b,rno-mir-27b,hsa-mir-27b,ppy-mir-27b,mml-mir-27b,cpo-mir-27b,tch-mir-27b,ppa-mir-27b,mmr-mir-27b,sbo-mir-27b,cgr-mir-27b,bta-mir-27b,eca-mir-27b,ptr-mir-27b,mdo-mir-27b,cja-mir-27b,cfa-mir-27b,pal-mir-27b,efu-mir-27b,ssc-mir-27b,ggo-mir-27b,dno-mir-27b,ocu-mir-27b,chi-mir-27b,nle-mir-27b,oga-mir-27b,dma-mir-27b,sha-mir-27b,gga-mir-27b,oni-mir-27b,gmo-mir-27b,aca-mir-27b,cli-mir-27b,tgu…	mmu-mir-27b	aggtgcAGAGCTTAGCTGATTGGTGAACagtgattggtttccgctttgTTCACAGTGGCTAAGTTCTGCacct	mmu-miR-27b-5p	AGAGCTTAGCTGATTGGTGAAC	5'	Yes	gp1a	........((((((.(((((........))..))).......(((((....(((((((((((((((((.((((.(((((((....(((...)))..))))))))))))))))))))))))))))..))))).)))))).((....)).....	89	48.7	-61.8	957	1197	833	2260	1480	1558	1748.28	1162.62	908.645	1879.02	1210.47	1183.95	middle
46	83	mmu-miR-27b-3p	TTCACAGTGGCTAAGTTCTGC	21	chr13	+	63300661	63300812	cgaagatgctcaccagccctttaattatggccggcgatgacctctctaacaaggtgcAGAGCTTAGCTGATTGGTGAACagtgattggtttccgctttgTTCACAGTGGCTAAGTTCTGCacctgaagagaaggtgagatggggacagttaa	38	mmu-mir-27b,rno-mir-27b,hsa-mir-27b,ppy-mir-27b,mml-mir-27b,cpo-mir-27b,tch-mir-27b,ppa-mir-27b,mmr-mir-27b,sbo-mir-27b,cgr-mir-27b,bta-mir-27b,eca-mir-27b,ptr-mir-27b,mdo-mir-27b,cja-mir-27b,cfa-mir-27b,pal-mir-27b,efu-mir-27b,ssc-mir-27b,ggo-mir-27b,dno-mir-27b,ocu-mir-27b,chi-mir-27b,nle-mir-27b,oga-mir-27b,dma-mir-27b,sha-mir-27b,gga-mir-27b,oni-mir-27b,gmo-mir-27b,aca-mir-27b,cli-mir-27b,tgu…	mmu-mir-27b	aggtgcAGAGCTTAGCTGATTGGTGAACagtgattggtttccgctttgTTCACAGTGGCTAAGTTCTGCacct	mmu-miR-27b-3p	TTCACAGTGGCTAAGTTCTGC	3'	Yes	gp1a	........((((((.(((((........))..))).......(((((....(((((((((((((((((.((((.(((((((....(((...)))..))))))))))))))))))))))))))))..))))).)))))).((....)).....	89	48.7	-61.8	135613	171978	169048	294760	274770	212562	247742	167039	184399	245071	224730	161529	high
47	84	mmu-miR-27a-5p	AGGGCTTAGCTGCTTGTGAGCA	22	chr8	+	84208672	84208758	tggcctgaggagcAGGGCTTAGCTGCTTGTGAGCAaggtccacagcaaagtcgtgTTCACAGTGGCTAAGTTCCGCCccctggaccc	23	mmu-mir-27a,rno-mir-27a,cgr-mir-27a,hsa-mir-27a,ptr-mir-27a,mml-mir-27a,ggo-mir-27a,ppa-mir-27a,bta-mir-27a,eca-mir-27a,ppy-mir-27a,cfa-mir-27a,efu-mir-27a,ssc-mir-27a,pal-mir-27a,dno-mir-27a,chi-mir-27a,tch-mir-27a,oar-mir-27a,mne-mir-27a,age-mir-27a,sla-mir-27a,lca-mir-27a,	mmu-mir-27a	tggcctgaggagcAGGGCTTAGCTGCTTGTGAGCAaggtccacagcaaagtcgtgTTCACAGTGGCTAAGTTCCGCcccctggaccc	mmu-miR-27a-5p	AGGGCTTAGCTGCTTGTGAGCA	5'	Yes	gp1a	.((((...((.((.(..((((((..(.((((((((.((............)).)))))))))..))))))..).))))...)).)).	85	59.8	-36.6	562	804	811	766	658	669	1026.68	780.91	884.647	636.871	538.169	508.383	middle
47	85	mmu-miR-27a-3p_R+1_1ss19CT	TTCACAGTGGCTAAGTTCTGCT	22	chr8	+	84208672	84208758	tggcctgaggagcAGGGCTTAGCTGCTTGTGAGCAaggtccacagcaaagtcgtgTTCACAGTGGCTAAGTTCCGCCccctggaccc	23	mmu-mir-27a,rno-mir-27a,cgr-mir-27a,hsa-mir-27a,ptr-mir-27a,mml-mir-27a,ggo-mir-27a,ppa-mir-27a,bta-mir-27a,eca-mir-27a,ppy-mir-27a,cfa-mir-27a,efu-mir-27a,ssc-mir-27a,pal-mir-27a,dno-mir-27a,chi-mir-27a,tch-mir-27a,oar-mir-27a,mne-mir-27a,age-mir-27a,sla-mir-27a,lca-mir-27a,	mmu-mir-27a	tggcctgaggagcAGGGCTTAGCTGCTTGTGAGCAaggtccacagcaaagtcgtgTTCACAGTGGCTAAGTTCCGCcccctggaccc	mmu-miR-27a-3p	TTCACAGTGGCTAAGTTCCGC	3'	Diff	gp1a	.((((...((.((.(..((((((..(.((((((((.((............)).)))))))))..))))))..).))))...)).)).	85	59.8	-36.6	12919	20924	20541	27053	31370	23291.5	23600.8	20323.1	22406.3	22492.5	25657.1	17699.5	high
48	86	mmu-miR-28a-5p_R-1	AAGGAGCTCACAGTCTATTGA	21	chr16	+	24827855	24827940	ggtccctaccttcAAGGAGCTCACAGTCTATTGAgttgcctttctgattctccCACTAGATTGTGAGCTGCTGGAgggcaggcact	19	mmu-mir-28a,rno-mir-28,cgr-mir-28,bta-mir-28,chi-mir-28,eca-mir-28,age-mir-28,lla-mir-28,cja-mir-28,cfa-mir-28,mmr-mir-28,efu-mir-28,ssc-mir-28,pal-mir-28,ocu-mir-28,tch-mir-28,oga-mir-28a,sbo-mir-28,sla-mir-28,	mmu-mir-28a	ggtccctaccttcAAGGAGCTCACAGTCTATTGAGttgcctttctgattctccCACTAGATTGTGAGCTGCTGGAgggcaggcact	mmu-miR-28a-5p	AAGGAGCTCACAGTCTATTGAG	5'	Diff	gp1a	(((.(((.(((((.((.(((((((((((((..(((((........)))))......))))))))))))).)).))))).))).)))	86	52.3	-38.1	2092	4072	3029.5	5896.83	3631.17	5348.67	3821.73	3955.06	3304.61	4902.77	2969.88	4064.53	middle
48	87	mmu-miR-28a-3p	CACTAGATTGTGAGCTGCTGGA	22	chr16	+	24827855	24827940	ggtccctaccttcAAGGAGCTCACAGTCTATTGAgttgcctttctgattctccCACTAGATTGTGAGCTGCTGGAgggcaggcact	19	mmu-mir-28a,rno-mir-28,cgr-mir-28,bta-mir-28,chi-mir-28,eca-mir-28,age-mir-28,lla-mir-28,cja-mir-28,cfa-mir-28,mmr-mir-28,efu-mir-28,ssc-mir-28,pal-mir-28,ocu-mir-28,tch-mir-28,oga-mir-28a,sbo-mir-28,sla-mir-28,	mmu-mir-28a	ggtccctaccttcAAGGAGCTCACAGTCTATTGAGttgcctttctgattctccCACTAGATTGTGAGCTGCTGGAgggcaggcact	mmu-miR-28a-3p	CACTAGATTGTGAGCTGCTGGA	3'	Yes	gp1a	(((.(((.(((((.((.(((((((((((((..(((((........)))))......))))))))))))).)).))))).))).)))	86	52.3	-38.1	1500	2072	1100	2232	1692	2831	2740.25	2012.49	1199.89	1855.74	1383.86	2151.32	middle
49	88	mmu-miR-28c_L+1R+1	AAGGAGCTCACAGTCTATTGAA	22	chr15	-	53614205	53614279	tcactgcagttacaaagacaaatgagatatgatccctacccttGAGGAGCTCACAGTCTATTGAAcacaagcagc	1	mmu-mir-28c,	mmu-mir-28c	tcactgcagttacaaagacaaatgagatatgatccctacccttgAGGAGCTCACAGTCTATTGAacacaagcagc	mmu-miR-28c	AGGAGCTCACAGTCTATTGA	3'	Diff	gp1a	...((((.(((.(((((((...((((........(((.......)))..))))..)))).))))))....)))).	71	44	-13.2	44	75.5	51	138.333	80.1667	128.167	80.3806	73.3317	55.6313	115.014	65.5672	97.3957	middle
50	89	mmu-miR-29a-5p_R+3	ACTGATTTCTTTTGGTGTTCAGAGT	25	chr6	-	31062660	31062747	accccttagaggatgACTGATTTCTTTTGGTGTTCAGAGTcaatagaattttcTAGCACCATCTGAAATCGGTTataatgattgggga	35	mmu-mir-29a,rno-mir-29a,cpo-mir-29a,cja-mir-29a,cfa-mir-29a,dno-mir-29a,nle-mir-29a,oga-mir-29a,mmr-mir-29a,dma-mir-29a,cgr-mir-29a,hsa-mir-29a,bta-mir-29a,ptr-mir-29a,ppy-mir-29a,mml-mir-29a,ggo-mir-29a,ppa-mir-29a,oar-mir-29a,mne-mir-29a,age-mir-29a,lla-mir-29a,sla-mir-29a,eca-mir-29a,mdo-mir-29a-1,efu-mir-29a,ssc-mir-29a,pal-mir-29a,ocu-mir-29a,chi-mir-29a,tch-mir-29a,sbo-mir-29a,gga-mir-29a,c…	mmu-mir-29a	accccttagaggatgACTGATTTCTTTTGGTGTTCAGagtcaatagaattttcTAGCACCATCTGAAATCGGTTAtaatgattgggga	mmu-miR-29a-5p	ACTGATTTCTTTTGGTGTTCAG	5'	Diff	gp1a	.((((.......((((((((((((...(((((((.((((...........)))))))))))...)))))))))))).......)))).	64	38.6	-34.6	6	13	42	15	50	67	10.961	12.6267	45.814	12.4714	40.8943	50.9142	middle
50	90	mmu-miR-29a-3p_R-1	TAGCACCATCTGAAATCGGTT	21	chr6	-	31062660	31062747	accccttagaggatgACTGATTTCTTTTGGTGTTCAGAGTcaatagaattttcTAGCACCATCTGAAATCGGTTataatgattgggga	35	mmu-mir-29a,rno-mir-29a,cpo-mir-29a,cja-mir-29a,cfa-mir-29a,dno-mir-29a,nle-mir-29a,oga-mir-29a,mmr-mir-29a,dma-mir-29a,cgr-mir-29a,hsa-mir-29a,bta-mir-29a,ptr-mir-29a,ppy-mir-29a,mml-mir-29a,ggo-mir-29a,ppa-mir-29a,oar-mir-29a,mne-mir-29a,age-mir-29a,lla-mir-29a,sla-mir-29a,eca-mir-29a,mdo-mir-29a-1,efu-mir-29a,ssc-mir-29a,pal-mir-29a,ocu-mir-29a,chi-mir-29a,tch-mir-29a,sbo-mir-29a,gga-mir-29a,c…	mmu-mir-29a	accccttagaggatgACTGATTTCTTTTGGTGTTCAGagtcaatagaattttcTAGCACCATCTGAAATCGGTTAtaatgattgggga	mmu-miR-29a-3p	TAGCACCATCTGAAATCGGTTA	3'	Diff	gp1a	.((((.......((((((((((((...(((((((.((((...........)))))))))))...)))))))))))).......)))).	64	38.6	-34.6	66846	110628	74039.5	101107	165645	106728	122116	107451	80763	84062.8	135479	81104.1	high
51	91	mmu-miR-29c-5p_L-2R+3	ACCGATTTCTCCTGGTGTTCAGA	23	chr1	+	195037545	195037640	ccatctcttacacaggctgACCGATTTCTCCTGGTGTTCAGAgtctgtttttgtcTAGCACCATTTGAAATCGGTTatgatgtagggggaagagca	32	mmu-mir-29c,rno-mir-29c-2,rno-mir-29c-1,hsa-mir-29c,bta-mir-29c,eca-mir-29c,ppy-mir-29c,mml-mir-29c,ssc-mir-29c,aja-mir-29c,cpo-mir-29c,cfa-mir-29c-1,cfa-mir-29c-2,ocu-mir-29c,nle-mir-29c,cgr-mir-29c,bta-mir-29d,eca-mir-29c-2,ptr-mir-29c,mdo-mir-29a-2,cja-mir-29c,efu-mir-29c,ggo-mir-29c,pal-mir-29c,dno-mir-29c,mmr-mir-29c,tch-mir-29c,gga-mir-29c,gmo-mir-29a-3,aca-mir-29a-2,cli-mir-29a-2,tgu-mir-2…	mmu-mir-29c	atctcttacacaggcTGACCGATTTCTCCTGGTGTTCagagtctgtttttgtcTAGCACCATTTGAAATCGGTTAtgatgtaggggga	mmu-miR-29c-5p	TGACCGATTTCTCCTGGTGTTC	5'	Diff	gp1a	...(((((((((((...(((((((((((...((((((((((((.....)))))...)))))))...))))))))))))).))))))))).......	86	45.8	-35.1	25	52	132	113	112	142	45.6708	50.5066	143.987	93.951	91.6032	107.908	middle
51	92	mmu-miR-29c-3p_R-1	TAGCACCATTTGAAATCGGTT	21	chr1	+	195037545	195037640	ccatctcttacacaggctgACCGATTTCTCCTGGTGTTCAGAgtctgtttttgtcTAGCACCATTTGAAATCGGTTatgatgtagggggaagagca	32	mmu-mir-29c,rno-mir-29c-2,rno-mir-29c-1,hsa-mir-29c,bta-mir-29c,eca-mir-29c,ppy-mir-29c,mml-mir-29c,ssc-mir-29c,aja-mir-29c,cpo-mir-29c,cfa-mir-29c-1,cfa-mir-29c-2,ocu-mir-29c,nle-mir-29c,cgr-mir-29c,bta-mir-29d,eca-mir-29c-2,ptr-mir-29c,mdo-mir-29a-2,cja-mir-29c,efu-mir-29c,ggo-mir-29c,pal-mir-29c,dno-mir-29c,mmr-mir-29c,tch-mir-29c,gga-mir-29c,gmo-mir-29a-3,aca-mir-29a-2,cli-mir-29a-2,tgu-mir-2…	mmu-mir-29c	atctcttacacaggcTGACCGATTTCTCCTGGTGTTCagagtctgtttttgtcTAGCACCATTTGAAATCGGTTAtgatgtaggggga	mmu-miR-29c-3p	TAGCACCATTTGAAATCGGTTA	3'	Diff	gp1a	...(((((((((((...(((((((((((...((((((((((((.....)))))...)))))))...))))))))))))).))))))))).......	86	45.8	-35.1	134	311.5	191.5	199	257	245	244.796	302.554	208.89	165.453	210.197	186.179	middle
52	93	mmu-miR-29b-1-5p_R+2	GCTGGTTTCATATGGTGGTTTAGA	24	chr6	-	31063015	31063101	gcttcttcaggaaGCTGGTTTCATATGGTGGTTTAGAtttaaatagtgattgtcTAGCACCATTTGAAATCAGTGTTcttggtggag	30	mmu-mir-29b-1,rno-mir-29b-1,cpo-mir-29b-1,dno-mir-29b-1,ocu-mir-29b-1,tch-mir-29b-2,oga-mir-29b-1,mmr-mir-29b-1,cgr-mir-29b,hsa-mir-29b-1,bta-mir-29b-1,eca-mir-29b,ptr-mir-29b-1,ppy-mir-29b-1,mml-mir-29b-1,ggo-mir-29b-1,ppa-mir-29b-1,age-mir-29b,lla-mir-29b,mdo-mir-29b-1,cja-mir-29b-2,cfa-mir-29b-1,pal-mir-29b-1,nle-mir-29b-1,efu-mir-29b,ssc-mir-29b-1,gga-mir-29b-1,gmo-mir-29b-2,cli-mir-29b-1,tgu…	mmu-mir-29b-1	aggaaGCTGGTTTCATATGGTGGTTTAgatttaaatagtgattgtcTAGCACCATTTGAAATCAGTGTTct	mmu-miR-29b-1-5p	GCTGGTTTCATATGGTGGTTTA	5'	Diff	gp1a	.((((..((((((((((((((((.((((((..((((((.............)))))))))))).)))))))))).))))))..))))	86	39.1	-33.6	39	45	44	45	76	117	71.2465	43.7077	47.9957	37.4141	62.1593	88.91	middle
52	94	mmu-miR-29b-3p	TAGCACCATTTGAAATCAGTGTT	23	chr6	-	31063015	31063101	gcttcttcaggaaGCTGGTTTCATATGGTGGTTTAGAtttaaatagtgattgtcTAGCACCATTTGAAATCAGTGTTcttggtggag	30	mmu-mir-29b-1,rno-mir-29b-1,cpo-mir-29b-1,dno-mir-29b-1,ocu-mir-29b-1,tch-mir-29b-2,oga-mir-29b-1,mmr-mir-29b-1,cgr-mir-29b,hsa-mir-29b-1,bta-mir-29b-1,eca-mir-29b,ptr-mir-29b-1,ppy-mir-29b-1,mml-mir-29b-1,ggo-mir-29b-1,ppa-mir-29b-1,age-mir-29b,lla-mir-29b,mdo-mir-29b-1,cja-mir-29b-2,cfa-mir-29b-1,pal-mir-29b-1,nle-mir-29b-1,efu-mir-29b,ssc-mir-29b-1,gga-mir-29b-1,gmo-mir-29b-2,cli-mir-29b-1,tgu…	mmu-mir-29b-1	aggaaGCTGGTTTCATATGGTGGTTTAgatttaaatagtgattgtcTAGCACCATTTGAAATCAGTGTTct	mmu-miR-29b-3p	TAGCACCATTTGAAATCAGTGTT	3'	Yes	gp1a	.((((..((((((((((((((((.((((((..((((((.............)))))))))))).)))))))))).))))))..))))	86	39.1	-33.6	916.5	1385	991.5	944.5	991.5	1191	1674.29	1345.22	1081.54	785.28	810.933	905.058	middle
53	95	mmu-miR-29b-2-5p_R-2	CTGGTTTCACATGGTGGCTTAGA	23	chr1	+	195037036	195037128	tcttcttctggaagCTGGTTTCACATGGTGGCTTAGAtttttccatctttgtatcTAGCACCATTTGAAATCAGTGTTttaggagtaagaatt	39	mmu-mir-29b-2,rno-mir-29b-3,rno-mir-29b-2,hsa-mir-29b-2,bta-mir-29b-2,eca-mir-29b-2,ptr-mir-29b-2,ppy-mir-29b-2,mml-mir-29b-2,ggo-mir-29b-2,ppa-mir-29b-2,oar-mir-29b-1,oar-mir-29b-2,mne-mir-29b,sla-mir-29b,aja-mir-29b,cpo-mir-29b-2,cgr-mir-29b-2,bta-mir-29e,mdo-mir-29b-2,cja-mir-29b-1,cfa-mir-29b-2,nle-mir-29b-2,oga-mir-29b-2,mmr-mir-29b-2,ssc-mir-29b-2,chi-mir-29b,pal-mir-29b-2,dno-mir-29b-2,ocu…	mmu-mir-29b-2	cttctggaagCTGGTTTCACATGGTGGCTTAGATTtttccatctttgtatcTAGCACCATTTGAAATCAGTGTTttaggag	mmu-miR-29b-2-5p	CTGGTTTCACATGGTGGCTTAGATT	5'	Diff	gp1a	(((((((((..((((((((((((.((((((.((.((((..............)))))))))))).)))))))))).))..))))).))))...	90	36.6	-34.3	42	108	91	148	141	177	76.727	104.898	99.2637	123.051	115.322	134.505	middle
53	96	mmu-miR-29b-3p	TAGCACCATTTGAAATCAGTGTT	23	chr1	+	195037036	195037128	tcttcttctggaagCTGGTTTCACATGGTGGCTTAGAtttttccatctttgtatcTAGCACCATTTGAAATCAGTGTTttaggagtaagaatt	39	mmu-mir-29b-2,rno-mir-29b-3,rno-mir-29b-2,hsa-mir-29b-2,bta-mir-29b-2,eca-mir-29b-2,ptr-mir-29b-2,ppy-mir-29b-2,mml-mir-29b-2,ggo-mir-29b-2,ppa-mir-29b-2,oar-mir-29b-1,oar-mir-29b-2,mne-mir-29b,sla-mir-29b,aja-mir-29b,cpo-mir-29b-2,cgr-mir-29b-2,bta-mir-29e,mdo-mir-29b-2,cja-mir-29b-1,cfa-mir-29b-2,nle-mir-29b-2,oga-mir-29b-2,mmr-mir-29b-2,ssc-mir-29b-2,chi-mir-29b,pal-mir-29b-2,dno-mir-29b-2,ocu…	mmu-mir-29b-2	cttctggaagCTGGTTTCACATGGTGGCTTAGATTtttccatctttgtatcTAGCACCATTTGAAATCAGTGTTttaggag	mmu-miR-29b-3p	TAGCACCATTTGAAATCAGTGTT	3'	Yes	gp1a	(((((((((..((((((((((((.((((((.((.((((..............)))))))))))).)))))))))).))..))))).))))...	90	36.6	-34.3	916.5	1385	991.5	944.5	991.5	1191	1674.29	1345.22	1081.54	785.28	810.933	905.058	middle
54	97	mmu-miR-30b-5p	TGTAAACATCCTACACTCAGCT	22	chr15	-	68337415	68337510	ctaagccaagtttcagttcaTGTAAACATCCTACACTCAGCTgtcatacatgcgttggCTGGGATGTGGATGTTTACGTCagctgtcttggagtat	16	mmu-mir-30b,rno-mir-30b,cgr-mir-30b,hsa-mir-30b,ptr-mir-30b,ppy-mir-30b,mml-mir-30b,ppa-mir-30b,mne-mir-30b,bta-mir-30b,cja-mir-30b,ggo-mir-30b,chi-mir-30b,oar-mir-30b,age-mir-30b,lla-mir-30b,	mmu-mir-30b	ctaagccaagtttcagttcaTGTAAACATCCTACACTCAGCTgtcatacatgcgttggCTGGGATGTGGATGTTTACGTCagctgtcttggagtat	mmu-miR-30b-5p	TGTAAACATCCTACACTCAGCT	5'	Yes	gp1a	.((..(((((...(((((.((((((((((((.((((((((((..............))))))).))))))))))))))).))))).)))))..)).	94	44.8	-40.7	7662	10906	10170	7341	13479	11439	13997.2	10592.8	11093.5	6103.49	11024.3	8692.66	high
54	98	mmu-miR-30b-3p	CTGGGATGTGGATGTTTACGTC	22	chr15	-	68337415	68337510	ctaagccaagtttcagttcaTGTAAACATCCTACACTCAGCTgtcatacatgcgttggCTGGGATGTGGATGTTTACGTCagctgtcttggagtat	16	mmu-mir-30b,rno-mir-30b,cgr-mir-30b,hsa-mir-30b,ptr-mir-30b,ppy-mir-30b,mml-mir-30b,ppa-mir-30b,mne-mir-30b,bta-mir-30b,cja-mir-30b,ggo-mir-30b,chi-mir-30b,oar-mir-30b,age-mir-30b,lla-mir-30b,	mmu-mir-30b	ctaagccaagtttcagttcaTGTAAACATCCTACACTCAGCTgtcatacatgcgttggCTGGGATGTGGATGTTTACGTCagctgtcttggagtat	mmu-miR-30b-3p	CTGGGATGTGGATGTTTACGTC	3'	Yes	gp1a	.((..(((((...(((((.((((((((((((.((((((((((..............))))))).))))))))))))))).))))).)))))..)).	94	44.8	-40.7	359	374	436	723	626	598	655.833	363.259	475.593	601.12	511.996	454.429	middle
55	99	mmu-miR-30c-5p_R+1	TGTAAACATCCTACACTCTCAGCT	24	chr4	-	120769527	120769627	ctgtaaccatgttgtagtgtgTGTAAACATCCTACACTCTCAGCTgtgagctcaaggtggCTGGGAGAGGGTTGTTTACTCCttctgccatggaaaacgtc	22	mmu-mir-30c-1,rno-mir-30c-1,cgr-mir-30c-1,cpo-mir-30c-1,hsa-mir-30c-1,eca-mir-30c,ppy-mir-30c-1,mml-mir-30c-1,bta-mir-30c,chi-mir-30c,oar-mir-30c,ptr-mir-30c-1,mdo-mir-30c-2,cfa-mir-30c-1,dno-mir-30c-1,ocu-mir-30c-1,efu-mir-30c,ssc-mir-30c-1,oni-mir-30b,gmo-mir-30b,cli-mir-30c-1,xla-mir-30c,	mmu-mir-30c-1	accatgttgtagtgtgTGTAAACATCCTACACTCTCAGCtgtgagctcaaggtggCTGGGAGAGGGTTGTTTACTCCttctgccatgga	mmu-miR-30c-5p	TGTAAACATCCTACACTCTCAGC	5'	Diff	gp1a	......(((((..((((.....(((((((.(((...((((((((..(.........)..)))))))).))).))))))).....)))))))))........	87	48.5	-34.7	3417	6451.5	5237.5	4757.5	5995.5	8684.5	6242.29	6266.22	5713.12	3955.5	4903.63	6599.47	middle
55	100	mmu-miR-30c-1-3p	CTGGGAGAGGGTTGTTTACTCC	22	chr4	-	120769527	120769627	ctgtaaccatgttgtagtgtgTGTAAACATCCTACACTCTCAGCTgtgagctcaaggtggCTGGGAGAGGGTTGTTTACTCCttctgccatggaaaacgtc	22	mmu-mir-30c-1,rno-mir-30c-1,cgr-mir-30c-1,cpo-mir-30c-1,hsa-mir-30c-1,eca-mir-30c,ppy-mir-30c-1,mml-mir-30c-1,bta-mir-30c,chi-mir-30c,oar-mir-30c,ptr-mir-30c-1,mdo-mir-30c-2,cfa-mir-30c-1,dno-mir-30c-1,ocu-mir-30c-1,efu-mir-30c,ssc-mir-30c-1,oni-mir-30b,gmo-mir-30b,cli-mir-30c-1,xla-mir-30c,	mmu-mir-30c-1	accatgttgtagtgtgTGTAAACATCCTACACTCTCAGCtgtgagctcaaggtggCTGGGAGAGGGTTGTTTACTCCttctgccatgga	mmu-miR-30c-1-3p	CTGGGAGAGGGTTGTTTACTCC	3'	Yes	gp1a	......(((((..((((.....(((((((.(((...((((((((..(.........)..)))))))).))).))))))).....)))))))))........	87	48.5	-34.7	35	79	91	133	100	135	63.9391	76.7312	99.2637	110.579	81.7885	102.588	middle
56	101	mmu-miR-30c-5p_R+1	TGTAAACATCCTACACTCTCAGCT	24	chr1	+	23291694	23291805	gagcactgagtgacagatatTGTAAACATCCTACACTCTCAGCTgtgaaaagtaagaaagCTGGGAGAAGGCTGTTTACTCTctctgccttggaaatcagctaagagaaatg	30	mmu-mir-30c-2,rno-mir-30c-2,cpo-mir-30c-2,cgr-mir-30c-2,hsa-mir-30c-2,ptr-mir-30c-2,mne-mir-30c,lla-mir-30c,bta-mir-30f,eca-mir-30c-2,mdo-mir-30c-1,mml-mir-30c-2,cja-mir-30c,cfa-mir-30c-2,nle-mir-30c,efu-mir-30b,ssc-mir-30c-2,ggo-mir-30c,pal-mir-30c,dma-mir-30c,dno-mir-30c-2,ocu-mir-30c-2,tch-mir-30c,oga-mir-30c,mmr-mir-30c,gga-mir-30c-2,aca-mir-30c-1,cli-mir-30c-2,tgu-mir-30c,xtr-mir-30c-2,	mmu-mir-30c-2	gagtgacagatatTGTAAACATCCTACACTCTCAGCtgtgaaaagtaagaaagCTGGGAGAAGGCTGTTTACTCTctctgcctt	mmu-miR-30c-5p	TGTAAACATCCTACACTCTCAGC	5'	Diff	gp1a	((...(..((...((((....(((((((.(((...(((((((((..............))))))))).))).)))))))....)))).))..)...))..............	98	42.9	-32.5	3417	6451.5	5237.5	4757.5	5995.5	8684.5	6242.29	6266.22	5713.12	3955.5	4903.63	6599.47	middle
56	102	mmu-miR-30c-2-3p	CTGGGAGAAGGCTGTTTACTCT	22	chr1	+	23291694	23291805	gagcactgagtgacagatatTGTAAACATCCTACACTCTCAGCTgtgaaaagtaagaaagCTGGGAGAAGGCTGTTTACTCTctctgccttggaaatcagctaagagaaatg	30	mmu-mir-30c-2,rno-mir-30c-2,cpo-mir-30c-2,cgr-mir-30c-2,hsa-mir-30c-2,ptr-mir-30c-2,mne-mir-30c,lla-mir-30c,bta-mir-30f,eca-mir-30c-2,mdo-mir-30c-1,mml-mir-30c-2,cja-mir-30c,cfa-mir-30c-2,nle-mir-30c,efu-mir-30b,ssc-mir-30c-2,ggo-mir-30c,pal-mir-30c,dma-mir-30c,dno-mir-30c-2,ocu-mir-30c-2,tch-mir-30c,oga-mir-30c,mmr-mir-30c,gga-mir-30c-2,aca-mir-30c-1,cli-mir-30c-2,tgu-mir-30c,xtr-mir-30c-2,	mmu-mir-30c-2	gagtgacagatatTGTAAACATCCTACACTCTCAGCtgtgaaaagtaagaaagCTGGGAGAAGGCTGTTTACTCTctctgcctt	mmu-miR-30c-2-3p	CTGGGAGAAGGCTGTTTACTCT	3'	Yes	gp1a	((...(..((...((((....(((((((.(((...(((((((((..............))))))))).))).)))))))....)))).))..)...))..............	98	42.9	-32.5	403	551	649	1072	930	1179	736.214	535.176	707.936	891.287	760.633	895.939	middle
57	103	mmu-miR-30a-5p_R+2	TGTAAACATCCTCGACTGGAAGCT	24	chr1	+	23272258	23272347	gttgacagtgagcgacTGTAAACATCCTCGACTGGAAGCTgtgaagccacaaatgggCTTTCAGTCGGATGTTTGCAGCtgcctactgcc	30	mmu-mir-30a,rno-mir-30a,cpo-mir-30a,cgr-mir-30a,hsa-mir-30a,ptr-mir-30a,ppy-mir-30a,ggo-mir-30a,ppa-mir-30a,bta-mir-30a,oar-mir-30a,mdo-mir-30a,mml-mir-30a,cja-mir-30a,cfa-mir-30a,tch-mir-30a,nle-mir-30a,efu-mir-30a,pal-mir-30a,dno-mir-30a,ocu-mir-30a,oga-mir-30a,mmr-mir-30a,dma-mir-30a,gga-mir-30a,aca-mir-30a,cli-mir-30a,tgu-mir-30b,xtr-mir-30a,xla-mir-30a,	mmu-mir-30a	gcgacTGTAAACATCCTCGACTGGAAGctgtgaagccacaaatgggCTTTCAGTCGGATGTTTGCAGCtgc	mmu-miR-30a-5p	TGTAAACATCCTCGACTGGAAG	5'	Diff	gp1a	.....((((..((..((((((((((((..((((((((((((((....))).....)))))))))))))))))))))))..))..))))..	83	52.2	-44.1	22757	40255	26018.5	45185.5	45987.5	48640	41573.2	39098.9	28381.2	37568.3	37612.5	36962.2	high
57	104	mmu-miR-30a-3p_1ss22CT	CTTTCAGTCGGATGTTTGCAGT	22	chr1	+	23272258	23272347	gttgacagtgagcgacTGTAAACATCCTCGACTGGAAGCTgtgaagccacaaatgggCTTTCAGTCGGATGTTTGCAGCtgcctactgcc	30	mmu-mir-30a,rno-mir-30a,cpo-mir-30a,cgr-mir-30a,hsa-mir-30a,ptr-mir-30a,ppy-mir-30a,ggo-mir-30a,ppa-mir-30a,bta-mir-30a,oar-mir-30a,mdo-mir-30a,mml-mir-30a,cja-mir-30a,cfa-mir-30a,tch-mir-30a,nle-mir-30a,efu-mir-30a,pal-mir-30a,dno-mir-30a,ocu-mir-30a,oga-mir-30a,mmr-mir-30a,dma-mir-30a,gga-mir-30a,aca-mir-30a,cli-mir-30a,tgu-mir-30b,xtr-mir-30a,xla-mir-30a,	mmu-mir-30a	gcgacTGTAAACATCCTCGACTGGAAGctgtgaagccacaaatgggCTTTCAGTCGGATGTTTGCAGCtgc	mmu-miR-30a-3p	CTTTCAGTCGGATGTTTGCAGC	3'	Diff	gp1a	.....((((..((..((((((((((((..((((((((((((((....))).....)))))))))))))))))))))))..))..))))..	83	52.2	-44.1	1192	2165.5	1147	2232	2458.5	2403.5	2177.58	2103.31	1251.16	1855.74	2010.77	1826.45	middle
58	105	mmu-miR-30d-5p_R+2	TGTAAACATCCCCGACTGGAAGCT	24	chr15	-	68341207	68341294	tcagaaagtctgtgtcTGTAAACATCCCCGACTGGAAGCTgtaagccacagccaagCTTTCAGTCAGATGTTTGCTGCtactggctct	27	mmu-mir-30d,rno-mir-30d,cpo-mir-30d,cgr-mir-30d,hsa-mir-30d,ptr-mir-30d,ppy-mir-30d,ggo-mir-30d,ppa-mir-30d,mne-mir-30d,bta-mir-30d,oar-mir-30d,eca-mir-30d,mdo-mir-30e,mml-mir-30d,cja-mir-30d,cfa-mir-30d,efu-mir-30d,pal-mir-30d,dno-mir-30d,ocu-mir-30d,chi-mir-30d,nle-mir-30d,oga-mir-30d,gga-mir-30d,gmo-mir-30a,xla-mir-30d,	mmu-mir-30d	aagtctgtgtcTGTAAACATCCCCGACTGGAAGctgtaagccacagccaagCTTTCAGTCAGATGTTTGCTGCtactggctc	mmu-miR-30d-5p	TGTAAACATCCCCGACTGGAAG	5'	Diff	gp1a	......((((.(((...(((((((((...(((((((((((....((....))..))))))))))).)))))))))...))).))))..	80	48.9	-33.8	45371	84162.5	74841	138298	128316	98360	82885.2	81745.4	81637.3	114984	104948	74745.2	high
58	106	mmu-miR-30d-3p	CTTTCAGTCAGATGTTTGCTGC	22	chr15	-	68341207	68341294	tcagaaagtctgtgtcTGTAAACATCCCCGACTGGAAGCTgtaagccacagccaagCTTTCAGTCAGATGTTTGCTGCtactggctct	27	mmu-mir-30d,rno-mir-30d,cpo-mir-30d,cgr-mir-30d,hsa-mir-30d,ptr-mir-30d,ppy-mir-30d,ggo-mir-30d,ppa-mir-30d,mne-mir-30d,bta-mir-30d,oar-mir-30d,eca-mir-30d,mdo-mir-30e,mml-mir-30d,cja-mir-30d,cfa-mir-30d,efu-mir-30d,pal-mir-30d,dno-mir-30d,ocu-mir-30d,chi-mir-30d,nle-mir-30d,oga-mir-30d,gga-mir-30d,gmo-mir-30a,xla-mir-30d,	mmu-mir-30d	aagtctgtgtcTGTAAACATCCCCGACTGGAAGctgtaagccacagccaagCTTTCAGTCAGATGTTTGCTGCtactggctc	mmu-miR-30d-3p	CTTTCAGTCAGATGTTTGCTGC	3'	Yes	gp1a	......((((.(((...(((((((((...(((((((((((....((....))..))))))))))).)))))))))...))).))))..	80	48.9	-33.8	59	85	60	105	91	74	107.783	82.5589	65.4486	87.2996	74.4276	56.2336	middle
59	107	mmu-miR-30e-5p_R+2	TGTAAACATCCTTGACTGGAAGCT	24	chr4	-	120772595	120772701	ttctgggcagtctttgctacTGTAAACATCCTTGACTGGAAGCTgtaaggtgttgagaggagCTTTCAGTCGGATGTTTACAGCggcaggctgccacagtcgtcccc	30	mmu-mir-30e,rno-mir-30e,cpo-mir-30e,cgr-mir-30e,hsa-mir-30e,eca-mir-30e,ppy-mir-30e,bta-mir-30e,ptr-mir-30e,mdo-mir-30d,mml-mir-30e,cja-mir-30e,cfa-mir-30e,efu-mir-30e,ssc-mir-30e,ggo-mir-30e,pal-mir-30e,ppa-mir-30e,nle-mir-30e,oga-mir-30e,mmr-mir-30e,dma-mir-30e,dno-mir-30e,ocu-mir-30e,chi-mir-30e,gga-mir-30e,oni-mir-30a-2,aca-mir-30e,cli-mir-30e,xla-mir-30e,	mmu-mir-30e	gggcagtctttgctacTGTAAACATCCTTGACTGGAAGctgtaaggtgttgagaggagCTTTCAGTCGGATGTTTACAGCggcaggctgcca	mmu-miR-30e-5p	TGTAAACATCCTTGACTGGAAG	5'	Diff	gp1a	..((((((((((..(((..((((((((((((..(((((((((((................)))))))))))))))))))))))..)))))))))).)))........	97	52.3	-54.7	10894	20201.5	17826.5	19700.5	17890	20675	19901.5	19621.3	19445.3	16379.5	14632	15711.2	high
59	108	mmu-miR-30e-3p_2ss18AG22CT	CTTTCAGTCGGATGTTTGCAGT	22	chr4	-	120772595	120772701	ttctgggcagtctttgctacTGTAAACATCCTTGACTGGAAGCTgtaaggtgttgagaggagCTTTCAGTCGGATGTTTACAGCggcaggctgccacagtcgtcccc	30	mmu-mir-30e,rno-mir-30e,cpo-mir-30e,cgr-mir-30e,hsa-mir-30e,eca-mir-30e,ppy-mir-30e,bta-mir-30e,ptr-mir-30e,mdo-mir-30d,mml-mir-30e,cja-mir-30e,cfa-mir-30e,efu-mir-30e,ssc-mir-30e,ggo-mir-30e,pal-mir-30e,ppa-mir-30e,nle-mir-30e,oga-mir-30e,mmr-mir-30e,dma-mir-30e,dno-mir-30e,ocu-mir-30e,chi-mir-30e,gga-mir-30e,oni-mir-30a-2,aca-mir-30e,cli-mir-30e,xla-mir-30e,	mmu-mir-30e	gggcagtctttgctacTGTAAACATCCTTGACTGGAAGctgtaaggtgttgagaggagCTTTCAGTCGGATGTTTACAGCggcaggctgcca	mmu-miR-30e-3p	CTTTCAGTCGGATGTTTACAGC	3'	Diff	gp1a	..((((((((((..(((..((((((((((((..(((((((((((................)))))))))))))))))))))))..)))))))))).)))........	97	52.3	-54.7	1192	2165.5	1147	2232	2458.5	2403.5	2177.58	2103.31	1251.16	1855.74	2010.77	1826.45	middle
60	109	mmu-miR-31-5p_R+1	AGGCAAGATGCTGGCATAGCTGT	23	chr4	-	88910557	88910662	tgctcctgtaactcggaactggagaggAGGCAAGATGCTGGCATAGCTGTtgaactgagaaccTGCTATGCCAACATATTGCCATCtttcctgtctgacagcagct	26	mmu-mir-31,rno-mir-31a,cpo-mir-31,cgr-mir-31,hsa-mir-31,ptr-mir-31,ppy-mir-31,mml-mir-31,ggo-mir-31,ppa-mir-31,mne-mir-31,bta-mir-31,eca-mir-31,mdo-mir-31,cja-mir-31,cfa-mir-31,ocu-mir-31,dma-mir-31,efu-mir-31,ssc-mir-31,pal-mir-31,dno-mir-31,nle-mir-31,oga-mir-31,mmr-mir-31,aca-mir-31,	mmu-mir-31	tgctcctgtaactcggaactggagaggAGGCAAGATGCTGGCATAGCTGttgaactgagaaccTGCTATGCCAACATATTGCCATCtttcctgtctgacagcagct	mmu-miR-31-5p	AGGCAAGATGCTGGCATAGCTG	5'	Diff	gp1a	.(((.(((....(((((...((((((..(((((.(((.(((((((((.(((........)))..))))))))).))).)))))..))))))..)))))))).))).	104	50	-48.8	3441	6423	7001	8214	9464	10528	6286.13	6238.54	7636.76	6829.32	7740.47	8000.38	high
60	110	mmu-miR-31-3p	TGCTATGCCAACATATTGCCATC	23	chr4	-	88910557	88910662	tgctcctgtaactcggaactggagaggAGGCAAGATGCTGGCATAGCTGTtgaactgagaaccTGCTATGCCAACATATTGCCATCtttcctgtctgacagcagct	26	mmu-mir-31,rno-mir-31a,cpo-mir-31,cgr-mir-31,hsa-mir-31,ptr-mir-31,ppy-mir-31,mml-mir-31,ggo-mir-31,ppa-mir-31,mne-mir-31,bta-mir-31,eca-mir-31,mdo-mir-31,cja-mir-31,cfa-mir-31,ocu-mir-31,dma-mir-31,efu-mir-31,ssc-mir-31,pal-mir-31,dno-mir-31,nle-mir-31,oga-mir-31,mmr-mir-31,aca-mir-31,	mmu-mir-31	tgctcctgtaactcggaactggagaggAGGCAAGATGCTGGCATAGCTGttgaactgagaaccTGCTATGCCAACATATTGCCATCtttcctgtctgacagcagct	mmu-miR-31-3p	TGCTATGCCAACATATTGCCATC	3'	Yes	gp1a	.(((.(((....(((((...((((((..(((((.(((.(((((((((.(((........)))..))))))))).))).)))))..))))))..)))))))).))).	104	50	-48.8	79	67	98	50	105	114	144.32	65.0758	106.899	41.5712	85.878	86.6302	middle
61	111	mmu-miR-32-5p_R-1	TATTGCACATTACTAAGTTGC	21	chr4	-	56895215	56895310	gcttgctctggtggagaTATTGCACATTACTAAGTTGCatgttgtcacggcctcaatgCAATTTAGTGTGTGTGATATTttcacatgagtgcatgc	25	mmu-mir-32,hsa-mir-32,ptr-mir-32,ppy-mir-32,mml-mir-32,ggo-mir-32,ppa-mir-32,mne-mir-32,sla-mir-32,rno-mir-32,cpo-mir-32,cgr-mir-32,eca-mir-32,mdo-mir-32,cja-mir-32,cfa-mir-32,ocu-mir-32,tch-mir-32,ssc-mir-32,pal-mir-32,dno-mir-32,gga-mir-32,aca-mir-32,cli-mir-32,tgu-mir-32,	mmu-mir-32	ggagaTATTGCACATTACTAAGTTGCAtgttgtcacggcctcaatgCAATTTAGTGTGTGTGATATTttc	mmu-miR-32-5p	TATTGCACATTACTAAGTTGCA	5'	Diff	gp1a	((..((((..((((((((((..((((.((((((((((((((..((....))..).)))))))))))))))))..))))))))))..))))))....	92	42.7	-43.7	48	119	69	86	94	61	87.688	115.582	75.2659	71.5025	76.8812	46.3548	middle
61	112	mmu-miR-32-3p	CAATTTAGTGTGTGTGATATT	21	chr4	-	56895215	56895310	gcttgctctggtggagaTATTGCACATTACTAAGTTGCatgttgtcacggcctcaatgCAATTTAGTGTGTGTGATATTttcacatgagtgcatgc	25	mmu-mir-32,hsa-mir-32,ptr-mir-32,ppy-mir-32,mml-mir-32,ggo-mir-32,ppa-mir-32,mne-mir-32,sla-mir-32,rno-mir-32,cpo-mir-32,cgr-mir-32,eca-mir-32,mdo-mir-32,cja-mir-32,cfa-mir-32,ocu-mir-32,tch-mir-32,ssc-mir-32,pal-mir-32,dno-mir-32,gga-mir-32,aca-mir-32,cli-mir-32,tgu-mir-32,	mmu-mir-32	ggagaTATTGCACATTACTAAGTTGCAtgttgtcacggcctcaatgCAATTTAGTGTGTGTGATATTttc	mmu-miR-32-3p	CAATTTAGTGTGTGTGATATT	3'	Yes	gp1a	((..((((..((((((((((..((((.((((((((((((((..((....))..).)))))))))))))))))..))))))))))..))))))....	92	42.7	-43.7	16	5	18	13	30	22	29.2293	4.85641	19.6346	10.8085	24.5366	16.7181	middle
62	113	mmu-miR-33-5p_R-1	GTGCATTGTAGTTGCATTGC	20	chr15	+	82198110	82198199	cctggcgggcagctgtgGTGCATTGTAGTTGCATTGCatgttctggcaatacctgtgCAATGTTTCCACAGTGCATCAcggaggcctgcc	18	mmu-mir-33,rno-mir-33,cpo-mir-33a,cgr-mir-33,hsa-mir-33a,ptr-mir-33a,ggo-mir-33,ppa-mir-33,bta-mir-33a,eca-mir-33a,ppy-mir-33a,cja-mir-33,cfa-mir-33a,efu-mir-33,pal-mir-33a,dno-mir-33a,ocu-mir-33a,chi-mir-33a,	mmu-mir-33	ctgtgGTGCATTGTAGTTGCATTGCAtgttctggcaatacctgtgCAATGTTTCCACAGTGCATCACgg	mmu-miR-33-5p	GTGCATTGTAGTTGCATTGCA	5'	Diff	gp1a	...(((((((..((((((((((((((....(((((((((.....((.....)).)))))))))....))))))))))))))..)))))))	87	55.6	-48.9	6	13	18	25	11	18	10.961	12.6267	19.6346	20.7856	8.99674	13.6785	middle
62	114	mmu-miR-33-3p_R-1	CAATGTTTCCACAGTGCATCA	21	chr15	+	82198110	82198199	cctggcgggcagctgtgGTGCATTGTAGTTGCATTGCatgttctggcaatacctgtgCAATGTTTCCACAGTGCATCAcggaggcctgcc	18	mmu-mir-33,rno-mir-33,cpo-mir-33a,cgr-mir-33,hsa-mir-33a,ptr-mir-33a,ggo-mir-33,ppa-mir-33,bta-mir-33a,eca-mir-33a,ppy-mir-33a,cja-mir-33,cfa-mir-33a,efu-mir-33,pal-mir-33a,dno-mir-33a,ocu-mir-33a,chi-mir-33a,	mmu-mir-33	ctgtgGTGCATTGTAGTTGCATTGCAtgttctggcaatacctgtgCAATGTTTCCACAGTGCATCACgg	mmu-miR-33-3p	CAATGTTTCCACAGTGCATCAC	3'	Diff	gp1a	...(((((((..((((((((((((((....(((((((((.....((.....)).)))))))))....))))))))))))))..)))))))	87	55.6	-48.9	13	19	17	12	0	15	23.7488	18.4543	18.5438	9.97709	0	11.3987	middle
63	115	mmu-miR-34c-5p	AGGCAGTGTAGTTAGCTGATTGC	23	chr9	-	51103034	51103111	gagtctagttactAGGCAGTGTAGTTAGCTGATTGCtaatagtaccAATCACTAACCACACAGCCAGGtaaaaagact	23	mmu-mir-34c,rno-mir-34c,cpo-mir-34c,cfa-mir-34c,pal-mir-34c,dno-mir-34c,tch-mir-34c,ppa-mir-34c,oga-mir-34c,mmr-mir-34c,cgr-mir-34c,hsa-mir-34c,ppy-mir-34c,bta-mir-34c,eca-mir-34c,ptr-mir-34c,mdo-mir-34c,cja-mir-34c,efu-mir-34c,ssc-mir-34c-1,ssc-mir-34c-2,gga-mir-34c,cli-mir-34c,	mmu-mir-34c	agtctagttactAGGCAGTGTAGTTAGCTGATTGCtaatagtaccAATCACTAACCACACAGCCAGGtaaaaagact	mmu-miR-34c-5p	AGGCAGTGTAGTTAGCTGATTGC	5'	Yes	gp1a	.(((((..((((..(((.((((.(((((.((((((.((....)).))))))))))).)))).)))..))))..)))))	77	41	-31.4	43200.5	86863.5	48249	62779	74254.5	93395.5	78920.1	84368.9	52630.5	52196	60731.7	70972.6	high
63	116	mmu-miR-34c-3p	AATCACTAACCACACAGCCAGG	22	chr9	-	51103034	51103111	gagtctagttactAGGCAGTGTAGTTAGCTGATTGCtaatagtaccAATCACTAACCACACAGCCAGGtaaaaagact	23	mmu-mir-34c,rno-mir-34c,cpo-mir-34c,cfa-mir-34c,pal-mir-34c,dno-mir-34c,tch-mir-34c,ppa-mir-34c,oga-mir-34c,mmr-mir-34c,cgr-mir-34c,hsa-mir-34c,ppy-mir-34c,bta-mir-34c,eca-mir-34c,ptr-mir-34c,mdo-mir-34c,cja-mir-34c,efu-mir-34c,ssc-mir-34c-1,ssc-mir-34c-2,gga-mir-34c,cli-mir-34c,	mmu-mir-34c	agtctagttactAGGCAGTGTAGTTAGCTGATTGCtaatagtaccAATCACTAACCACACAGCCAGGtaaaaagact	mmu-miR-34c-3p	AATCACTAACCACACAGCCAGG	3'	Yes	gp1a	.(((((..((((..(((.((((.(((((.((((((.((....)).))))))))))).)))).)))..))))..)))))	77	41	-31.4	564	1202	773	938	2044	2276	1030.33	1167.48	843.196	779.876	1671.76	1729.56	middle
64	117	mmu-miR-34b-5p	AGGCAGTGTAATTAGCTGATTGT	23	chr9	-	51103544	51103650	gcccggtgctcggtttgtAGGCAGTGTAATTAGCTGATTGTagtgcggtgctgacAATCACTAACTCCACTGCCATCaaaacaaggcacagcatcacccgccgcccg	18	mmu-mir-34b,rno-mir-34b,cgr-mir-34b,hsa-mir-34b,mml-mir-34b,bta-mir-34b,eca-mir-34b,ptr-mir-34b,ppy-mir-34b,cja-mir-34b,cfa-mir-34b,efu-mir-34b,ggo-mir-34b,pal-mir-34b,ocu-mir-34b,chi-mir-34b,oga-mir-34b,mmr-mir-34b,	mmu-mir-34b	gtgctcggtttgtAGGCAGTGTAATTAGCTGATTGTagtgcggtgctgacAATCACTAACTCCACTGCCATCaaaacaaggcac	mmu-miR-34b-5p	AGGCAGTGTAATTAGCTGATTGT	5'	Yes	gp1a	((...(((((..((((...(((((((...((((.((((((((((.....))).)))))))))))...)))))))....))))..))))).))...............	92	55.1	-36.5	115.5	216.5	130	78	180.5	372.5	210.999	210.282	141.805	64.8511	147.628	283.068	middle
64	118	mmu-miR-34b-3p	AATCACTAACTCCACTGCCATC	22	chr9	-	51103544	51103650	gcccggtgctcggtttgtAGGCAGTGTAATTAGCTGATTGTagtgcggtgctgacAATCACTAACTCCACTGCCATCaaaacaaggcacagcatcacccgccgcccg	18	mmu-mir-34b,rno-mir-34b,cgr-mir-34b,hsa-mir-34b,mml-mir-34b,bta-mir-34b,eca-mir-34b,ptr-mir-34b,ppy-mir-34b,cja-mir-34b,cfa-mir-34b,efu-mir-34b,ggo-mir-34b,pal-mir-34b,ocu-mir-34b,chi-mir-34b,oga-mir-34b,mmr-mir-34b,	mmu-mir-34b	gtgctcggtttgtAGGCAGTGTAATTAGCTGATTGTagtgcggtgctgacAATCACTAACTCCACTGCCATCaaaacaaggcac	mmu-miR-34b-3p	AATCACTAACTCCACTGCCATC	3'	Yes	gp1a	((...(((((..((((...(((((((...((((.((((((((((.....))).)))))))))))...)))))))....))))..))))).))...............	92	55.1	-36.5	980	1921	1098	1527	3396	2673	1790.3	1865.83	1197.71	1269.59	2777.54	2031.25	middle
65	119	mmu-miR-34a-5p	TGGCAGTGTCTTAGCTGGTTGT	22	chr4	+	150068452	150068561	ggccagctgtgagtaattcttTGGCAGTGTCTTAGCTGGTTGTtgtgagtattagctaaggaagcAATCAGCAAGTATACTGCCCTAgaagtgctgcacattgttgggcc	39	mmu-mir-34a,rno-mir-34a,cpo-mir-34a,cgr-mir-34a,hsa-mir-34a,ptr-mir-34a,ppy-mir-34a,ggo-mir-34a,ppa-mir-34a,bta-mir-34a,chi-mir-34a,eca-mir-34a,mdo-mir-34a,mml-mir-34a,mne-mir-34a,cja-mir-34a,cfa-mir-34a,oga-mir-34a,efu-mir-34a,ssc-mir-34a,pal-mir-34a,dno-mir-34a,ocu-mir-34a,tch-mir-34a-2,tch-mir-34a-1,nle-mir-34a,mmr-mir-34a,age-mir-34a,lla-mir-34a,sla-mir-34a,gga-mir-34a,oni-mir-34,gmo-mir-34,a…	mmu-mir-34a	ccagctgtgagtaattcttTGGCAGTGTCTTAGCTGGTTGTtgtgagtattagctaaggaagcAATCAGCAAGTATACTGCCCTagaagtgctgcacattgt	mmu-miR-34a-5p	TGGCAGTGTCTTAGCTGGTTGT	5'	Yes	gp1a	(((((((((((((((.((((..(((((((((((.((((((((((...(((....))).....))))))))))))).))))))))..)))).)))).))))..))))).))	110	47.3	-50.2	5779	9327	12817	11808	20742	27655	10557.3	9059.14	13980.9	9817.46	16964.6	21015.4	high
65	120	mmu-miR-34a-3p_R+1	AATCAGCAAGTATACTGCCCTA	22	chr4	+	150068452	150068561	ggccagctgtgagtaattcttTGGCAGTGTCTTAGCTGGTTGTtgtgagtattagctaaggaagcAATCAGCAAGTATACTGCCCTAgaagtgctgcacattgttgggcc	39	mmu-mir-34a,rno-mir-34a,cpo-mir-34a,cgr-mir-34a,hsa-mir-34a,ptr-mir-34a,ppy-mir-34a,ggo-mir-34a,ppa-mir-34a,bta-mir-34a,chi-mir-34a,eca-mir-34a,mdo-mir-34a,mml-mir-34a,mne-mir-34a,cja-mir-34a,cfa-mir-34a,oga-mir-34a,efu-mir-34a,ssc-mir-34a,pal-mir-34a,dno-mir-34a,ocu-mir-34a,tch-mir-34a-2,tch-mir-34a-1,nle-mir-34a,mmr-mir-34a,age-mir-34a,lla-mir-34a,sla-mir-34a,gga-mir-34a,oni-mir-34,gmo-mir-34,a…	mmu-mir-34a	ccagctgtgagtaattcttTGGCAGTGTCTTAGCTGGTTGTtgtgagtattagctaaggaagcAATCAGCAAGTATACTGCCCTagaagtgctgcacattgt	mmu-miR-34a-3p	AATCAGCAAGTATACTGCCCT	3'	Diff	gp1a	(((((((((((((((.((((..(((((((((((.((((((((((...(((....))).....))))))))))))).))))))))..)))).)))).))))..))))).))	110	47.3	-50.2	23	15	13	8	36	36	42.0171	14.5692	14.1805	6.6514	29.4439	27.3569	middle
66	121	mmu-miR-92b-5p_R-1	AGGGACGGGACGTGGTGCAGTGT	23	chr3	-	89227108	89227218	agcgggattccagagccccgggtgggcgggAGGGACGGGACGTGGTGCAGTGTtgttctttcccctgccaaTATTGCACTCGTCCCGGCCTCCggccccctcggccccccc	18	mmu-mir-92b,rno-mir-92b,cgr-mir-92b,hsa-mir-92b,bta-mir-92b,eca-mir-92b,ptr-mir-92b,mdo-mir-92b,ppy-mir-92b,mml-mir-92b,cja-mir-92b,cfa-mir-92b,efu-mir-92b,ssc-mir-92b,pal-mir-92b,dno-mir-92b,ppa-mir-92b,nle-mir-92b,	mmu-mir-92b	ggtgggcgggAGGGACGGGACGTGGTGCAGTGTTgttctttcccctgccaaTATTGCACTCGTCCCGGCCTCCggccccctcg	mmu-miR-92b-5p	AGGGACGGGACGTGGTGCAGTGTT	5'	Diff	gp1a	...(((...........(((((.((((.(((((..(((((((.((((((((((((.............))))))))))))))))))).))))).)))).))))))))....	104	70.3	-60.4	0	5	0	7	5	6	0	4.85641	0	5.81997	4.08943	4.55948	low
66	122	mmu-miR-92b-3p	TATTGCACTCGTCCCGGCCTCC	22	chr3	-	89227108	89227218	agcgggattccagagccccgggtgggcgggAGGGACGGGACGTGGTGCAGTGTtgttctttcccctgccaaTATTGCACTCGTCCCGGCCTCCggccccctcggccccccc	18	mmu-mir-92b,rno-mir-92b,cgr-mir-92b,hsa-mir-92b,bta-mir-92b,eca-mir-92b,ptr-mir-92b,mdo-mir-92b,ppy-mir-92b,mml-mir-92b,cja-mir-92b,cfa-mir-92b,efu-mir-92b,ssc-mir-92b,pal-mir-92b,dno-mir-92b,ppa-mir-92b,nle-mir-92b,	mmu-mir-92b	ggtgggcgggAGGGACGGGACGTGGTGCAGTGTTgttctttcccctgccaaTATTGCACTCGTCCCGGCCTCCggccccctcg	mmu-miR-92b-3p	TATTGCACTCGTCCCGGCCTCC	3'	Yes	gp1a	...(((...........(((((.((((.(((((..(((((((.((((((((((((.............))))))))))))))))))).))))).)))).))))))))....	104	70.3	-60.4	268	645	818	921	861	871	489.591	626.476	892.283	765.742	704.199	661.885	middle
67	123	mmu-miR-92a-1-5p	AGGTTGGGATTTGTCGCAATGCT	23	chr14	+	115044412	115044520	gggaaaatcaaacccctttctacacAGGTTGGGATTTGTCGCAATGCTgtgtttctctgtatggTATTGCACTTGTCCCGGCCTGTtgagtttggtggggattgtgacc	35	mmu-mir-92a-1,rno-mir-92a-1,cpo-mir-92a-1,cfa-mir-92a-1,pal-mir-92a-2,oga-mir-92a-2,mmr-mir-92a,dma-mir-92a-1,sbo-mir-92a-2,cgr-mir-92a,hsa-mir-92a-1,bta-mir-92a-1,ptr-mir-92-1,mml-mir-92a-1,ggo-mir-92-1,ppa-mir-92a-1,age-mir-92-1,lla-mir-92-1,sla-mir-92-1,lca-mir-92-1,eca-mir-92a,mdo-mir-92a-1,ppy-mir-92-1,cja-mir-92a-2,efu-mir-92c,ssc-mir-92a-1,dno-mir-92a-1,ocu-mir-92a-1,chi-mir-92a,tch-mir-92…	mmu-mir-92a-1	ctttctacacAGGTTGGGATTTGTCGCAATGCTgtgtttctctgtatggTATTGCACTTGTCCCGGCCTGttgagtttgg	mmu-miR-92a-1-5p	AGGTTGGGATTTGTCGCAATGCT	5'	Yes	gp1a	((......(((.((((...((..(((((..(((((..((.(((((((..((........))..)))))))))..)))))..)))))..))......)))).)))...))	109	48.6	-43.1	44	29	18	35	116	52	80.3806	28.1672	19.6346	29.0999	94.8747	39.5155	middle
67	124	mmu-miR-92a-3p_R+1	TATTGCACTTGTCCCGGCCTGT	22	chr14	+	115044412	115044520	gggaaaatcaaacccctttctacacAGGTTGGGATTTGTCGCAATGCTgtgtttctctgtatggTATTGCACTTGTCCCGGCCTGTtgagtttggtggggattgtgacc	35	mmu-mir-92a-1,rno-mir-92a-1,cpo-mir-92a-1,cfa-mir-92a-1,pal-mir-92a-2,oga-mir-92a-2,mmr-mir-92a,dma-mir-92a-1,sbo-mir-92a-2,cgr-mir-92a,hsa-mir-92a-1,bta-mir-92a-1,ptr-mir-92-1,mml-mir-92a-1,ggo-mir-92-1,ppa-mir-92a-1,age-mir-92-1,lla-mir-92-1,sla-mir-92-1,lca-mir-92-1,eca-mir-92a,mdo-mir-92a-1,ppy-mir-92-1,cja-mir-92a-2,efu-mir-92c,ssc-mir-92a-1,dno-mir-92a-1,ocu-mir-92a-1,chi-mir-92a,tch-mir-92…	mmu-mir-92a-1	ctttctacacAGGTTGGGATTTGTCGCAATGCTgtgtttctctgtatggTATTGCACTTGTCCCGGCCTGttgagtttgg	mmu-miR-92a-3p	TATTGCACTTGTCCCGGCCTG	3'	Diff	gp1a	((......(((.((((...((..(((((..(((((..((.(((((((..((........))..)))))))))..)))))..)))))..))......)))).)))...))	109	48.6	-43.1	7586.5	8715.5	13177.5	20085.5	18056	14204	13859.3	8465.2	14374.2	16699.6	14767.7	10793.8	high
68	125	mmu-miR-92a-3p_R+1	TATTGCACTTGTCCCGGCCTGT	22	chrX	-	52741838	52741928	tgcccattcatccacaggtggggattggtggcattacttgtgttagatataaagTATTGCACTTGTCCCGGCCTGAggaagaaagagggtt	22	mmu-mir-92a-2,rno-mir-92a-2,hsa-mir-92a-2,ptr-mir-92-2,ppy-mir-92-2,mml-mir-92a-2,ggo-mir-92-2,ppa-mir-92a-2,mne-mir-92,age-mir-92-2,lla-mir-92-2,sla-mir-92-2,bta-mir-92a-2,eca-mir-92a-2,cja-mir-92a-1,cfa-mir-92a-2,efu-mir-92a,pal-mir-92a-1,dno-mir-92a-2,nle-mir-92a-1,oga-mir-92a-1,sbo-mir-92a-1,	mmu-mir-92a-2	tgcccattcatccacAGGTGGGGATTGGTGGCATTACttgtgttagatataaagTATTGCACTTGTCCCGGCCTGaggaagaaagagggtt	mmu-miR-92a-3p	TATTGCACTTGTCCCGGCCTG	3'	Diff	gp1a	.((((.(((.(((.((((..(((((..((.(((.(((((((((...)))))).))).)))))..)))))..)))).))).)))...)))).	89	47.3	-37.9	7586.5	8715.5	13177.5	20085.5	18056	14204	13859.3	8465.2	14374.2	16699.6	14767.7	10793.8	high
69	126	mmu-miR-93-5p	CAAAGTGCTGTTCGTGCAGGTAG	23	chr5	-	138165523	138165610	agtcatgggggctcCAAAGTGCTGTTCGTGCAGGTAGtgtaattacctgacctACTGCTGAGCTAGCACTTCCCGAgcccccaggaca	28	mmu-mir-93,rno-mir-93,cpo-mir-93,dno-mir-93,ocu-mir-93,tch-mir-93,cgr-mir-93,hsa-mir-93,sla-mir-93,bta-mir-93,eca-mir-93,ptr-mir-93,ppy-mir-93,ggo-mir-93,ppa-mir-93,mdo-mir-93,mml-mir-93,mne-mir-93,cja-mir-93,cfa-mir-93,pal-mir-93,oga-mir-93,dma-mir-93,efu-mir-93,chi-mir-93,nle-mir-93,age-mir-93,lla-mir-93,	mmu-mir-93	agtcatgggggctcCAAAGTGCTGTTCGTGCAGGTAGtgtaattacctgacctACTGCTGAGCTAGCACTTCCCGagcccccaggaca	mmu-miR-93-5p	CAAAGTGCTGTTCGTGCAGGTAG	5'	Yes	gp1a	.(((.(((((((((..((((((((((((.((((.(((.((.........)))))))))))))).)))))))...))))))))).))).	86	55.7	-47	6918	8017	12230	15913	12318	15540	12638	7786.76	13340.6	13230.5	10074.7	11809.1	high
69	127	mmu-miR-93-3p_R+1	ACTGCTGAGCTAGCACTTCCCGA	23	chr5	-	138165523	138165610	agtcatgggggctcCAAAGTGCTGTTCGTGCAGGTAGtgtaattacctgacctACTGCTGAGCTAGCACTTCCCGAgcccccaggaca	28	mmu-mir-93,rno-mir-93,cpo-mir-93,dno-mir-93,ocu-mir-93,tch-mir-93,cgr-mir-93,hsa-mir-93,sla-mir-93,bta-mir-93,eca-mir-93,ptr-mir-93,ppy-mir-93,ggo-mir-93,ppa-mir-93,mdo-mir-93,mml-mir-93,mne-mir-93,cja-mir-93,cfa-mir-93,pal-mir-93,oga-mir-93,dma-mir-93,efu-mir-93,chi-mir-93,nle-mir-93,age-mir-93,lla-mir-93,	mmu-mir-93	agtcatgggggctcCAAAGTGCTGTTCGTGCAGGTAGtgtaattacctgacctACTGCTGAGCTAGCACTTCCCGagcccccaggaca	mmu-miR-93-3p	ACTGCTGAGCTAGCACTTCCCG	3'	Diff	gp1a	.(((.(((((((((..((((((((((((.((((.(((.((.........)))))))))))))).)))))))...))))))))).))).	86	55.7	-47	111	138	105	179	204	219	202.778	134.037	114.535	148.825	166.849	166.421	middle
70	128	mmu-miR-96-5p	TTTGGCACTAGCACATTTTTGCT	23	chr6	-	30169446	30169551	ccagtaccatctgcttggccgatTTTGGCACTAGCACATTTTTGCTtgtgtctctccgctgtgagcaatcatgtgtagtgccaatatgggaaaagcgggctgctgc	26	mmu-mir-96,rno-mir-96,cpo-mir-96,hsa-mir-96,eca-mir-96,ptr-mir-96,ppy-mir-96,mml-mir-96,ggo-mir-96,ppa-mir-96,mne-mir-96,bta-mir-96,mdo-mir-96,cja-mir-96,cfa-mir-96,ssc-mir-96,pal-mir-96,dno-mir-96,ocu-mir-96,chi-mir-96,sla-mir-96,oni-mir-96-2,oni-mir-96-3,oni-mir-96-1,gmo-mir-96,xla-mir-96,	mmu-mir-96	ccagtaccatctgcttggccgatTTTGGCACTAGCACATTTTTGCTtgtgtctctccgctgtgagCAATCATGTGTAGTGCCAATATgggaaaagcgggctgctgc	mmu-miR-96-5p	TTTGGCACTAGCACATTTTTGCT	5'	Yes	gp1a	.(((((...(((((((..((.((.(((((((((.(((((..(((((..(((......)).)..)))))..)))))))))))))).)).))..))))))).))))).	104	50.9	-47.3	23	6	14	5	40	34	42.0171	5.82769	15.2713	4.15712	32.7154	25.8371	middle
71	129	mmu-miR-98-5p	TGAGGTAGTAAGTTGTATTGTT	22	chrX	+	151913213	151913326	tctgcacatgctggggTGAGGTAGTAAGTTGTATTGTTgtggggtagggattttaggccccagtaagaagataaCTATACAACTTACTACTTTCCTtggtgtgtggcatattca	25	mmu-mir-98,rno-mir-98,cpo-mir-98,cgr-mir-98,hsa-mir-98,ptr-mir-98,bta-mir-98,eca-mir-98,ppy-mir-98,mml-mir-98,ggo-mir-98,ppa-mir-98,age-mir-98,cja-mir-98,nle-mir-98,cfa-mir-98,ssc-mir-98,pal-mir-98,dno-mir-98,ocu-mir-98,chi-mir-98,tch-mir-98,oga-mir-98,dma-mir-98,mmr-mir-98,	mmu-mir-98	ctgcacatgctggggTGAGGTAGTAAGTTGTATTGTTgtggggtagggattttaggccccagtaagaagataaCTATACAACTTACTACTTTCCTtggtgtgtggcat	mmu-miR-98-5p	TGAGGTAGTAAGTTGTATTGTT	5'	Yes	gp1a	..((((((..(..(((.(((((((((((((((((.((((((((((...........)))))).........)))).))))))))))))))))))))..)..)))).))......	106	43	-50.1	4674.25	6643.2	3755.9	9702.7	6646.6	6430.75	8539.07	6452.41	4096.97	8067.06	5436.16	4886.82	high
71	130	mmu-miR-98-3p	CTATACAACTTACTACTTTCCT	22	chrX	+	151913213	151913326	tctgcacatgctggggTGAGGTAGTAAGTTGTATTGTTgtggggtagggattttaggccccagtaagaagataaCTATACAACTTACTACTTTCCTtggtgtgtggcatattca	25	mmu-mir-98,rno-mir-98,cpo-mir-98,cgr-mir-98,hsa-mir-98,ptr-mir-98,bta-mir-98,eca-mir-98,ppy-mir-98,mml-mir-98,ggo-mir-98,ppa-mir-98,age-mir-98,cja-mir-98,nle-mir-98,cfa-mir-98,ssc-mir-98,pal-mir-98,dno-mir-98,ocu-mir-98,chi-mir-98,tch-mir-98,oga-mir-98,dma-mir-98,mmr-mir-98,	mmu-mir-98	ctgcacatgctggggTGAGGTAGTAAGTTGTATTGTTgtggggtagggattttaggccccagtaagaagataaCTATACAACTTACTACTTTCCTtggtgtgtggcat	mmu-miR-98-3p	CTATACAACTTACTACTTTCCT	3'	Yes	gp1a	..((((((..(..(((.(((((((((((((((((.((((((((((...........)))))).........)))).))))))))))))))))))))..)..)))).))......	106	43	-50.1	0	5	5	0	0	14	0	4.85641	5.45405	0	0	10.6388	middle
72	131	mmu-miR-99a-5p	AACCCGTAGATCCGATCTTGTG	22	chr16	+	77598924	77599014	gatgcccattgacataAACCCGTAGATCCGATCTTGTGgtgaagtggaccgcgCAAGCTCGTTTCTATGGGTCTGTggcagtgtggtgatc	33	mmu-mir-99a,rno-mir-99a,cgr-mir-99a,hsa-mir-99a,bta-mir-99a,ptr-mir-99a,mml-mir-99a,ggo-mir-99a,chi-mir-99a,ppa-mir-99a,oar-mir-99a,mne-mir-99a,lla-mir-99a,eca-mir-99a-2,ppy-mir-99a,cja-mir-99,cfa-mir-99a-1,efu-mir-99a,ssc-mir-99a,pal-mir-99a,dno-mir-99a,ocu-mir-99a,nle-mir-99a,oga-mir-99a,sbo-mir-99a,tch-mir-99a,gga-mir-99a,aca-mir-99a,cli-mir-99,tgu-mir-99-1,tgu-mir-99-2,xtr-mir-99,xla-mir-99,	mmu-mir-99a	cataAACCCGTAGATCCGATCTTGTGgtgaagtggaccgcgCAAGCTCGTTTCTATGGGTCTgtg	mmu-miR-99a-5p	AACCCGTAGATCCGATCTTGTG	5'	Yes	gp1a	(((((((((((.((((.(((((((((..(((.((((((.((........)))))))).)))..))))))))).)))).))))).))).)))	91	52.7	-40.9	61668	131820	71856	135060	191028	136158	112657	128034	78381.3	112292	156239	103469	high
72	132	mmu-miR-99a-3p_R+2	CAAGCTCGTTTCTATGGGTCTGT	23	chr16	+	77598924	77599014	gatgcccattgacataAACCCGTAGATCCGATCTTGTGgtgaagtggaccgcgCAAGCTCGTTTCTATGGGTCTGTggcagtgtggtgatc	33	mmu-mir-99a,rno-mir-99a,cgr-mir-99a,hsa-mir-99a,bta-mir-99a,ptr-mir-99a,mml-mir-99a,ggo-mir-99a,chi-mir-99a,ppa-mir-99a,oar-mir-99a,mne-mir-99a,lla-mir-99a,eca-mir-99a-2,ppy-mir-99a,cja-mir-99,cfa-mir-99a-1,efu-mir-99a,ssc-mir-99a,pal-mir-99a,dno-mir-99a,ocu-mir-99a,nle-mir-99a,oga-mir-99a,sbo-mir-99a,tch-mir-99a,gga-mir-99a,aca-mir-99a,cli-mir-99,tgu-mir-99-1,tgu-mir-99-2,xtr-mir-99,xla-mir-99,	mmu-mir-99a	cataAACCCGTAGATCCGATCTTGTGgtgaagtggaccgcgCAAGCTCGTTTCTATGGGTCTgtg	mmu-miR-99a-3p	CAAGCTCGTTTCTATGGGTCT	3'	Diff	gp1a	(((((((((((.((((.(((((((((..(((.((((((.((........)))))))).)))..))))))))).)))).))))).))).)))	91	52.7	-40.9	23	56	43	70	134	117	42.0171	54.3917	46.9048	58.1997	109.597	88.91	middle
73	133	mmu-miR-99b-5p	CACCCGTAGAACCGACCTTGCG	22	chr17	+	17830184	17830263	tcctggcaccCACCCGTAGAACCGACCTTGCGgggccttcgccgcacaCAAGCTCGTGTCTGTGGGTCCGTgtcgggggc	16	mmu-mir-99b,rno-mir-99b,cgr-mir-99b,hsa-mir-99b,bta-mir-99b,eca-mir-99b,mml-mir-99b,ssc-mir-99b,chi-mir-99b,cpo-mir-99b,ptr-mir-99b,cfa-mir-99b,efu-mir-99b,pal-mir-99b,tch-mir-99b,oga-mir-99b,	mmu-mir-99b	ggcaccCACCCGTAGAACCGACCTTGCGgggccttcgccgcacaCAAGCTCGTGTCTGTGGGTCCGtgtc	mmu-miR-99b-5p	CACCCGTAGAACCGACCTTGCG	5'	Yes	gp1a	(((((((((..((((..(((..(((.(((((((((...)).)))))....)).)))..)))..))))..)))))))))..	78	68.8	-37.4	72291	142424	144009	308697	238260	183619	132064	138334	157086	256658	194869	139535	high
73	134	mmu-miR-99b-3p_R+1	CAAGCTCGTGTCTGTGGGTCCGA	23	chr17	+	17830184	17830263	tcctggcaccCACCCGTAGAACCGACCTTGCGgggccttcgccgcacaCAAGCTCGTGTCTGTGGGTCCGTgtcgggggc	16	mmu-mir-99b,rno-mir-99b,cgr-mir-99b,hsa-mir-99b,bta-mir-99b,eca-mir-99b,mml-mir-99b,ssc-mir-99b,chi-mir-99b,cpo-mir-99b,ptr-mir-99b,cfa-mir-99b,efu-mir-99b,pal-mir-99b,tch-mir-99b,oga-mir-99b,	mmu-mir-99b	ggcaccCACCCGTAGAACCGACCTTGCGgggccttcgccgcacaCAAGCTCGTGTCTGTGGGTCCGtgtc	mmu-miR-99b-3p	CAAGCTCGTGTCTGTGGGTCCG	3'	Diff	gp1a	(((((((((..((((..(((..(((.(((((((((...)).)))))....)).)))..)))..))))..)))))))))..	78	68.8	-37.4	583	1203	1453	2539	1464	1682	1065.04	1168.45	1584.95	2110.99	1197.38	1278.18	middle
74	135	mmu-miR-100-5p_1ss16AT	AACCCGTAGATCCGATCTTGTG	22	chr9	+	41531424	41531504	gcctgttgccacaAACCCGTAGATCCGAACTTGTGctgattctgcacACAAGCTTGTGTCTATAGGTATgtgtctgttagg	24	mmu-mir-100,rno-mir-100,cgr-mir-100,hsa-mir-100,ptr-mir-100,ggo-mir-100,ppa-mir-100,bta-mir-100,mdo-mir-100,ppy-mir-100,mml-mir-100,cfa-mir-99a-2,ssc-mir-100,pal-mir-100,chi-mir-100,oga-mir-100,age-mir-100,lla-mir-100,sla-mir-100,gga-mir-100,dre-mir-100-2,ccr-mir-100,tni-mir-100,fru-mir-100,	mmu-mir-100	cctgttgccacaAACCCGTAGATCCGAACTTGTGctgattctgcacACAAGCTTGTGTCTATAGGTATgtgtctgttagg	mmu-miR-100-5p	AACCCGTAGATCCGAACTTGTG	5'	Diff	gp1a	.((((....((((.(((..((((..(((.((((((.((......)))))))).)))..))))..))).)))).....))))	80	48.1	-28.1	61668	131820	71856	135060	191028	136158	112657	128034	78381.3	112292	156239	103469	high
74	136	mmu-miR-100-3p	ACAAGCTTGTGTCTATAGGTAT	22	chr9	+	41531424	41531504	gcctgttgccacaAACCCGTAGATCCGAACTTGTGctgattctgcacACAAGCTTGTGTCTATAGGTATgtgtctgttagg	24	mmu-mir-100,rno-mir-100,cgr-mir-100,hsa-mir-100,ptr-mir-100,ggo-mir-100,ppa-mir-100,bta-mir-100,mdo-mir-100,ppy-mir-100,mml-mir-100,cfa-mir-99a-2,ssc-mir-100,pal-mir-100,chi-mir-100,oga-mir-100,age-mir-100,lla-mir-100,sla-mir-100,gga-mir-100,dre-mir-100-2,ccr-mir-100,tni-mir-100,fru-mir-100,	mmu-mir-100	cctgttgccacaAACCCGTAGATCCGAACTTGTGctgattctgcacACAAGCTTGTGTCTATAGGTATgtgtctgttagg	mmu-miR-100-3p	ACAAGCTTGTGTCTATAGGTAT	3'	Yes	gp1a	.((((....((((.(((..((((..(((.((((((.((......)))))))).)))..))))..))).)))).....))))	80	48.1	-28.1	6	20	0	14	27	26	10.961	19.4256	0	11.6399	22.0829	19.7578	middle
75	137	mmu-miR-101a-3p_L+1R-1	GTACAGTACTGTGATAACTGA	21	chr4	-	101346943	101347029	acaggctgccctggctcagttatcacagtgctgatgctgtccattctaaagGTACAGTACTGTGATAACTGAaggatggcagccatc	41	mmu-mir-101a,bta-mir-101-1,chi-mir-101,rno-mir-101a,ptr-mir-101-1,ppy-mir-101-1,mml-mir-101-1,ggo-mir-101,ppa-mir-101,mne-mir-101,lla-mir-101,sla-mir-101,cpo-mir-101-1,cgr-mir-101a,hsa-mir-101-1,age-mir-101,eca-mir-101-1,mdo-mir-101-1,cja-mir-101-1,ssc-mir-101-2,cfa-mir-101-1,pal-mir-101-2,efu-mir-101,dno-mir-101-1,ocu-mir-101-1,tch-mir-101,nle-mir-101-1,dma-mir-101-1,oga-mir-101,mmr-mir-101-1,gg…	mmu-mir-101a	aggctgccctggcTCAGTTATCACAGTGCTGATGCtgtccattctaaaggTACAGTACTGTGATAACTGAAggatggcagcca	mmu-miR-101a-3p	TACAGTACTGTGATAACTGAA	3'	Diff	gp1a	...(((((((.....((((((((((((((((((.((((............)))))))))))))))))))))).....)))))))...	81	49.4	-47.1	2494.33	6673.67	6984.5	4957.33	4745.67	6338.83	4556.73	6482.01	7618.76	4121.65	3881.41	4816.97	high
76	138	rno-miR-101b-3p_L+1R-1_1ss17GA	GTACAGTACTGTGATAACTGA	21	chr19	+	29135279	29135375	atctgagactgaactgccctttttcggttatcatggtaccgatgctgtagctctgaaagGTACAGTACTGTGATAGCTGAagaatggcggtgccatc	11	mmu-mir-101b,rno-mir-101b,cgr-mir-101b,hsa-mir-101-2,bta-mir-101-2,ppy-mir-101-2,mml-mir-101-2,eca-mir-101-2,ptr-mir-101-2,mdo-mir-101-2,ssc-mir-101-1,	rno-mir-101b	atctgagactgaactgtccttttTCGGTTATCATGGTACCGATGCtgtagatctgaaaggTACAGTACTGTGATAGCTGAAgaatggtggtgccatc	rno-miR-101b-3p	TACAGTACTGTGATAGCTGAA	3'	Diff	gp1a	.........((.((((((.((((((((((((((..((......((((((.((.....)).))))))))..)))))))))))))).))))))..))..	86	47.4	-39.7	2494.33	6673.67	6984.5	4957.33	4745.67	6338.83	4556.73	6482.01	7618.76	4121.65	3881.41	4816.97	high
77	139	mmu-miR-101c_L+2R+1	GTACAGTACTGTGATAACTGAT	22	chr9	-	3038669	3038743	tgatgccctactgcacagtcctgtgatgactgactgctcaactGCACAGTACTGTGATAACTGATcgcctaactg	1	mmu-mir-101c,	mmu-mir-101c	tgatgccctactgcacagtcctgtgatgactgactgctcaactgcACAGTACTGTGATAACTGAtcgcctaactg	mmu-miR-101c	ACAGTACTGTGATAACTGA	3'	Diff	gp1a	.(((.........((((((.(((((.....(((....)))....))))).)))))).......))).........	43	49.3	-16.3	10.3333	15.6667	14	6.33333	11.6667	19.3333	18.8773	15.2167	15.2713	5.26569	9.542	14.6917	middle
78	140	mmu-miR-103-2-5p_R+1	AGCTTCTTTACAGTGCTGCCTTGT	24	chr2	+	131288036	131288149	ccacctcagcagagctgtcttcgtgctttcAGCTTCTTTACAGTGCTGCCTTGTagcattcaggtcaAGCAGCATTGTACAGGGCTATGAaagaaccaagaatgggctgccctt	28	mmu-mir-103-2,rno-mir-103-2,cpo-mir-103-2,cgr-mir-103,hsa-mir-103a-2,ppy-mir-103-2,mml-mir-103-2,bta-mir-103-2,eca-mir-103,ptr-mir-103-2,mdo-mir-103-2,cja-mir-103a-1,cfa-mir-103-2,efu-mir-103b,ssc-mir-103-2,pal-mir-103b,dno-mir-103a-2,ocu-mir-103a-2,oga-mir-103b,mmr-mir-103b,chi-mir-103,tch-mir-103a-2,dma-mir-103b,oni-mir-103-1,gmo-mir-103-2,cli-mir-103-2,tgu-mir-103-2,xla-mir-103b,	mmu-mir-103-2	gtcttcgtgctttcAGCTTCTTTACAGTGCTGCCTTGtagcattcaggtcaAGCAGCATTGTACAGGGCTATGAaagaaccaagaa	mmu-miR-103-2-5p	AGCTTCTTTACAGTGCTGCCTTG	5'	Diff	gp1a	........((((.....((((.((.((((((((.(((.(((((((((((((((.......))))....))))))))))).))))))..))))).)).)))).....))))....	102	50	-39.2	8.5	5.5	10	12.5	19.5	14	15.5281	5.34205	10.9081	10.3928	15.9488	10.6388	middle
78	141	mmu-miR-103-3p	AGCAGCATTGTACAGGGCTATGA	23	chr2	+	131288036	131288149	ccacctcagcagagctgtcttcgtgctttcAGCTTCTTTACAGTGCTGCCTTGTagcattcaggtcaAGCAGCATTGTACAGGGCTATGAaagaaccaagaatgggctgccctt	28	mmu-mir-103-2,rno-mir-103-2,cpo-mir-103-2,cgr-mir-103,hsa-mir-103a-2,ppy-mir-103-2,mml-mir-103-2,bta-mir-103-2,eca-mir-103,ptr-mir-103-2,mdo-mir-103-2,cja-mir-103a-1,cfa-mir-103-2,efu-mir-103b,ssc-mir-103-2,pal-mir-103b,dno-mir-103a-2,ocu-mir-103a-2,oga-mir-103b,mmr-mir-103b,chi-mir-103,tch-mir-103a-2,dma-mir-103b,oni-mir-103-1,gmo-mir-103-2,cli-mir-103-2,tgu-mir-103-2,xla-mir-103b,	mmu-mir-103-2	gtcttcgtgctttcAGCTTCTTTACAGTGCTGCCTTGtagcattcaggtcaAGCAGCATTGTACAGGGCTATGAaagaaccaagaa	mmu-miR-103-3p	AGCAGCATTGTACAGGGCTATGA	3'	Yes	gp1a	........((((.....((((.((.((((((((.(((.(((((((((((((((.......))))....))))))))))).))))))..))))).)).)))).....))))....	102	50	-39.2	12147.2	26789.3	16883.5	33149.2	24257.3	25535.7	22190.8	26020	18416.7	27561	19839.7	19404.9	high
79	142	mmu-miR-103-1-5p	GGCTTCTTTACAGTGCTGCCTTG	23	chr11	+	35782396	35782481	ttcttactgccctcGGCTTCTTTACAGTGCTGCCTTGttgcatatggatcaAGCAGCATTGTACAGGGCTATGAaggcattgagac	33	mmu-mir-103-1,rno-mir-103-1,cpo-mir-103-1,dno-mir-103a-1,ocu-mir-103a-1,hsa-mir-103a-1,ptr-mir-103-1,ppy-mir-103-1,mml-mir-103-1,ggo-mir-103,ppa-mir-103,mne-mir-103,age-mir-103,lla-mir-103,bta-mir-103-1,eca-mir-107a,mdo-mir-103-1,cja-mir-103a-2,cfa-mir-103-1,pal-mir-103a,tch-mir-103a-1,nle-mir-103a,oga-mir-103a,mmr-mir-103a,xla-mir-103a,efu-mir-103a,ssc-mir-103-1,oar-mir-103,dma-mir-103a,gga-mir-…	mmu-mir-103-1	ttcttactgccctcGGCTTCTTTACAGTGCTGCCTTGttgcatatggatcaAGCAGCATTGTACAGGGCTATGAaggcattgagac	mmu-miR-103-1-5p	GGCTTCTTTACAGTGCTGCCTTG	5'	Yes	gp1a	.(((((.((((.(((((.(((.(((((((((((.(((............)))))))))))))).))))))..)).)))).))))).	84	47.7	-34.6	0	0	0	0	0	6	0	0	0	0	0	4.55948	low
79	143	mmu-miR-103-3p	AGCAGCATTGTACAGGGCTATGA	23	chr11	+	35782396	35782481	ttcttactgccctcGGCTTCTTTACAGTGCTGCCTTGttgcatatggatcaAGCAGCATTGTACAGGGCTATGAaggcattgagac	33	mmu-mir-103-1,rno-mir-103-1,cpo-mir-103-1,dno-mir-103a-1,ocu-mir-103a-1,hsa-mir-103a-1,ptr-mir-103-1,ppy-mir-103-1,mml-mir-103-1,ggo-mir-103,ppa-mir-103,mne-mir-103,age-mir-103,lla-mir-103,bta-mir-103-1,eca-mir-107a,mdo-mir-103-1,cja-mir-103a-2,cfa-mir-103-1,pal-mir-103a,tch-mir-103a-1,nle-mir-103a,oga-mir-103a,mmr-mir-103a,xla-mir-103a,efu-mir-103a,ssc-mir-103-1,oar-mir-103,dma-mir-103a,gga-mir-…	mmu-mir-103-1	ttcttactgccctcGGCTTCTTTACAGTGCTGCCTTGttgcatatggatcaAGCAGCATTGTACAGGGCTATGAaggcattgagac	mmu-miR-103-3p	AGCAGCATTGTACAGGGCTATGA	3'	Yes	gp1a	.(((((.((((.(((((.(((.(((((((((((.(((............)))))))))))))).))))))..)).)))).))))).	84	47.7	-34.6	12147.2	26789.3	16883.5	33149.2	24257.3	25535.7	22190.8	26020	18416.7	27561	19839.7	19404.9	high
80	144	mmu-miR-106a-5p	CAAAGTGCTAACAGTGCAGGTAG	23	chrX	-	52742503	52742567	atgtCAAAGTGCTAACAGTGCAGGTAGctttttgagttctactgcagtgccagcacttcttacat	1	mmu-mir-106a,	mmu-mir-106a	atgtCAAAGTGCTAACAGTGCAGGTAGctttttgagttctACTGCAGTGCCAGCACTTCTTACat	mmu-miR-106a-5p	CAAAGTGCTAACAGTGCAGGTAG	5'	Yes	gp1a	((((..(((((((..((.(((((..(((((...)))))...))))).))..)))))))...))))	65	43.1	-22.7	7	18	8	12	13	10	12.7878	17.4831	8.72648	9.97709	10.6325	7.59914	middle
81	145	mmu-miR-106b-5p	TAAAGTGCTGACAGTGCAGAT	21	chr5	-	138165735	138165818	cctgctgggacTAAAGTGCTGACAGTGCAGATagtggtcctctctgtgctaCCGCACTGTGGGTACTTGCTGCtccagcagggc	27	mmu-mir-106b,rno-mir-106b,cpo-mir-106b,cgr-mir-106b,hsa-mir-106b,ptr-mir-106b,ppy-mir-106b,ggo-mir-106b,ppa-mir-106b,age-mir-106b,sla-mir-106b,bta-mir-106b,eca-mir-106b,mml-mir-106b,mne-mir-106b,cja-mir-106b,dno-mir-106b,cfa-mir-106b,efu-mir-106,pal-mir-106b,ocu-mir-106b,chi-mir-106b,oar-mir-106b,nle-mir-106b,oga-mir-106b,dma-mir-106b,lla-mir-106b,	mmu-mir-106b	cctgctgggacTAAAGTGCTGACAGTGCAGATagtggtcctctctgtgctaCCGCACTGTGGGTACTTGCTGCtccagcagg	mmu-miR-106b-5p	TAAAGTGCTGACAGTGCAGAT	5'	Yes	gp1a	(((((((((....((((((..(((((((((((((.(.....).)))).))...)))))))..))))))....).))))))))..	82	58.3	-38.9	1283	1822	2138	1954	1670	2134	2343.83	1769.67	2332.15	1624.6	1365.87	1621.66	middle
81	146	mmu-miR-106b-3p	CCGCACTGTGGGTACTTGCTGC	22	chr5	-	138165735	138165818	cctgctgggacTAAAGTGCTGACAGTGCAGATagtggtcctctctgtgctaCCGCACTGTGGGTACTTGCTGCtccagcagggc	27	mmu-mir-106b,rno-mir-106b,cpo-mir-106b,cgr-mir-106b,hsa-mir-106b,ptr-mir-106b,ppy-mir-106b,ggo-mir-106b,ppa-mir-106b,age-mir-106b,sla-mir-106b,bta-mir-106b,eca-mir-106b,mml-mir-106b,mne-mir-106b,cja-mir-106b,dno-mir-106b,cfa-mir-106b,efu-mir-106,pal-mir-106b,ocu-mir-106b,chi-mir-106b,oar-mir-106b,nle-mir-106b,oga-mir-106b,dma-mir-106b,lla-mir-106b,	mmu-mir-106b	cctgctgggacTAAAGTGCTGACAGTGCAGATagtggtcctctctgtgctaCCGCACTGTGGGTACTTGCTGCtccagcagg	mmu-miR-106b-3p	CCGCACTGTGGGTACTTGCTGC	3'	Yes	gp1a	(((((((((....((((((..(((((((((((((.(.....).)))).))...)))))))..))))))....).))))))))..	82	58.3	-38.9	901	1302	2489	3167	1872	2408	1645.98	1264.61	2715.03	2633.12	1531.08	1829.87	middle
82	147	mmu-miR-107-5p_R+1_1ss16TC	AGCTTCTTTACAGTGCTGCCTTGT	24	chr19	-	34820687	34820773	ttctctgtgctttcAGCTTCTTTACAGTGTTGCCTTGTggcatggagttcaAGCAGCATTGTACAGGGCTATCAaagcacagagagc	37	mmu-mir-107,rno-mir-107,cpo-mir-107,cgr-mir-107,hsa-mir-107,bta-mir-107,eca-mir-107b,ptr-mir-107,ppy-mir-107,mml-mir-107,ggo-mir-107,ppa-mir-107,oar-mir-107,mne-mir-107,lla-mir-107,mdo-mir-107,cja-mir-103a-3,cfa-mir-107,pal-mir-107a,tch-mir-107,nle-mir-107,oga-mir-107,mmr-mir-107,xla-mir-107,efu-mir-107,ssc-mir-107,chi-mir-107,dno-mir-107,ocu-mir-107,dma-mir-107,gga-mir-107,gga-mir-103-2,oni-mir-…	mmu-mir-107	ttctctgtgctttcAGCTTCTTTACAGTGTTGCCTTGtggcatggagttcaAGCAGCATTGTACAGGGCTATCAaagcacagagagc	mmu-miR-107-5p	AGCTTCTTTACAGTGTTGCCTTG	5'	Diff	gp1a	(((((((((((((.((((.((.(((((((((((.(((............)))))))))))))).))))))...))))))))))))).	86	47.1	-39.3	8.5	5.5	10	12.5	19.5	14	15.5281	5.34205	10.9081	10.3928	15.9488	10.6388	middle
82	148	mmu-miR-107-3p_1ss22CG	AGCAGCATTGTACAGGGCTATGA	23	chr19	-	34820687	34820773	ttctctgtgctttcAGCTTCTTTACAGTGTTGCCTTGTggcatggagttcaAGCAGCATTGTACAGGGCTATCAaagcacagagagc	37	mmu-mir-107,rno-mir-107,cpo-mir-107,cgr-mir-107,hsa-mir-107,bta-mir-107,eca-mir-107b,ptr-mir-107,ppy-mir-107,mml-mir-107,ggo-mir-107,ppa-mir-107,oar-mir-107,mne-mir-107,lla-mir-107,mdo-mir-107,cja-mir-103a-3,cfa-mir-107,pal-mir-107a,tch-mir-107,nle-mir-107,oga-mir-107,mmr-mir-107,xla-mir-107,efu-mir-107,ssc-mir-107,chi-mir-107,dno-mir-107,ocu-mir-107,dma-mir-107,gga-mir-107,gga-mir-103-2,oni-mir-…	mmu-mir-107	ttctctgtgctttcAGCTTCTTTACAGTGTTGCCTTGtggcatggagttcaAGCAGCATTGTACAGGGCTATCAaagcacagagagc	mmu-miR-107-3p	AGCAGCATTGTACAGGGCTATCA	3'	Diff	gp1a	(((((((((((((.((((.((.(((((((((((.(((............)))))))))))))).))))))...))))))))))))).	86	47.1	-39.3	12147.2	26789.3	16883.5	33149.2	24257.3	25535.7	22190.8	26020	18416.7	27561	19839.7	19404.9	high
83	149	mmu-miR-122-5p	TGGAGTGTGACAATGGTGTTTG	22	chr18	+	65248849	65248941	tttccttagcagagctgTGGAGTGTGACAATGGTGTTTGtgtccaaaccatcaaacgccattatcacactaaatagctactgctaggcaatcc	27	mmu-mir-122,rno-mir-122,cpo-mir-122,cfa-mir-122,ocu-mir-122,cgr-mir-122,hsa-mir-122,ppy-mir-122,bta-mir-122,ssc-mir-122,eca-mir-122,ptr-mir-122,mdo-mir-122,mml-mir-122a,cja-mir-122,ggo-mir-122,pal-mir-122,dno-mir-122,chi-mir-122,tch-mir-122,gga-mir-122-1,gga-mir-122-2,aca-mir-122,tgu-mir-122,tni-mir-122,fru-mir-122,pol-mir-122,	mmu-mir-122	agctgTGGAGTGTGACAATGGTGTTTGtgtccaaaccatcAAACGCCATTATCACACTAAATagct	mmu-miR-122-5p	TGGAGTGTGACAATGGTGTTTG	5'	Yes	gp1a	....((((((((((((((..(((((((.(((((((((((((.......)).))))))))))).)))))))..)))))).))))))))......	83	44.1	-46.7	5	29	0	71	49	30	9.13416	28.1672	0	59.0311	40.0764	22.7974	middle
84	150	mmu-miR-125b-5p	TCCCTGAGACCCTAACTTGTGA	22	chr16	+	77646266	77646349	agactttgcctagTCCCTGAGACCCTAACTTGTGAggtattttagtaacatcACAAGTCAGGTTCTTGGGACctaggcggaggg	33	mmu-mir-125b-2,rno-mir-125b-2,cpo-mir-125b-2,cgr-mir-125b,hsa-mir-125b-2,ptr-mir-125b-2,ppy-mir-125b-2,mml-mir-125b-2,ssc-mir-125b-2,ggo-mir-125b-2,mne-mir-125b-2,age-mir-125b-2,lla-mir-125b-2,lca-mir-125b,bta-mir-125b-2,eca-mir-125b-2,mdo-mir-125b-1,cja-mir-125b,pal-mir-125b-2,dma-mir-125b-2,cfa-mir-125b-2,dno-mir-125b-2,ocu-mir-125b-2,nle-mir-125b-2,sbo-mir-125b-2,efu-mir-125b,chi-mir-125b,oga-…	mmu-mir-125b-2	gcctagTCCCTGAGACCCTAACTTGTGAggtattttagtaacatcACAAGTCAGGTTCTTGGGACCTaggc	mmu-miR-125b-5p	TCCCTGAGACCCTAACTTGTGA	5'	Yes	gp1a	...((..((((((..((..(((.(((.((((((((..(((....)))...)))))))).))).)))..))..))))))..))..	79	48.8	-42	99470	195091	175747	430530	559002	414492	181715	189488	191707	357953	457200	314978	high
84	151	mmu-miR-125b-2-3p_R-2	ACAAGTCAGGTTCTTGGGAC	20	chr16	+	77646266	77646349	agactttgcctagTCCCTGAGACCCTAACTTGTGAggtattttagtaacatcACAAGTCAGGTTCTTGGGACctaggcggaggg	33	mmu-mir-125b-2,rno-mir-125b-2,cpo-mir-125b-2,cgr-mir-125b,hsa-mir-125b-2,ptr-mir-125b-2,ppy-mir-125b-2,mml-mir-125b-2,ssc-mir-125b-2,ggo-mir-125b-2,mne-mir-125b-2,age-mir-125b-2,lla-mir-125b-2,lca-mir-125b,bta-mir-125b-2,eca-mir-125b-2,mdo-mir-125b-1,cja-mir-125b,pal-mir-125b-2,dma-mir-125b-2,cfa-mir-125b-2,dno-mir-125b-2,ocu-mir-125b-2,nle-mir-125b-2,sbo-mir-125b-2,efu-mir-125b,chi-mir-125b,oga-…	mmu-mir-125b-2	gcctagTCCCTGAGACCCTAACTTGTGAggtattttagtaacatcACAAGTCAGGTTCTTGGGACCTaggc	mmu-miR-125b-2-3p	ACAAGTCAGGTTCTTGGGACCT	3'	Diff	gp1a	...((..((((((..((..(((.(((.((((((((..(((....)))...)))))))).))).)))..))..))))))..))..	79	48.8	-42	507	1492	731	1201	1862	1253	926.204	1449.15	797.382	998.541	1522.9	952.172	middle
85	152	mmu-miR-125a-5p	TCCCTGAGACCCTTTAACCTGTGA	24	chr17	+	17830803	17830888	tgccggcctctgggTCCCTGAGACCCTTTAACCTGTGAggacgtccagggtcACAGGTGAGGTTCTTGGGAGCctggcgcctggcc	21	mmu-mir-125a,rno-mir-125a,cpo-mir-125a,cfa-mir-125a,nle-mir-125a,sbo-mir-125a,cgr-mir-125a,hsa-mir-125a,ppy-mir-125a,bta-mir-125a,eca-mir-125a,ptr-mir-125a,mml-mir-125a,cja-mir-125a,ssc-mir-125a,pal-mir-125a,chi-mir-125a,tch-mir-125a,ppa-mir-125a,oga-mir-125a,dma-mir-125a,	mmu-mir-125a	ctgggTCCCTGAGACCCTTTAACCTGTGAggacgtccagggtcACAGGTGAGGTTCTTGGGAGCCtgg	mmu-miR-125a-5p	TCCCTGAGACCCTTTAACCTGTGA	5'	Yes	gp1a	.((((((..(..((..((..(((.((((..((((((((((....))....)))))))))))).)))..))..))..).))).))).	84	65.1	-45.3	22821	45013	47976	88031	92479	98983	41690.1	43720.3	52332.7	73191.1	75637.2	75218.6	high
85	153	mmu-miR-125a-3p_R-1	ACAGGTGAGGTTCTTGGGAGC	21	chr17	+	17830803	17830888	tgccggcctctgggTCCCTGAGACCCTTTAACCTGTGAggacgtccagggtcACAGGTGAGGTTCTTGGGAGCctggcgcctggcc	21	mmu-mir-125a,rno-mir-125a,cpo-mir-125a,cfa-mir-125a,nle-mir-125a,sbo-mir-125a,cgr-mir-125a,hsa-mir-125a,ppy-mir-125a,bta-mir-125a,eca-mir-125a,ptr-mir-125a,mml-mir-125a,cja-mir-125a,ssc-mir-125a,pal-mir-125a,chi-mir-125a,tch-mir-125a,ppa-mir-125a,oga-mir-125a,dma-mir-125a,	mmu-mir-125a	ctgggTCCCTGAGACCCTTTAACCTGTGAggacgtccagggtcACAGGTGAGGTTCTTGGGAGCCtgg	mmu-miR-125a-3p	ACAGGTGAGGTTCTTGGGAGCC	3'	Diff	gp1a	.((((((..(..((..((..(((.((((..((((((((((....))....)))))))))))).)))..))..))..).))).))).	84	65.1	-45.3	355	924	899	1209	742	986	648.526	897.464	980.638	1005.19	606.871	749.275	middle
86	154	mmu-miR-125b-5p	TCCCTGAGACCCTAACTTGTGA	22	chr9	+	41581923	41582019	tgttgcgctcccctcagTCCCTGAGACCCTAACTTGTGAtgtttaccgtttaaatccACGGGTTAGGCTCTTGGGAGCTgcgggtcgtgcctttgca	34	mmu-mir-125b-1,rno-mir-125b-1,cpo-mir-125b-1,dno-mir-125b-1,ocu-mir-125b-1,tch-mir-125b,oga-mir-125b-1,mmr-mir-125a,sbo-mir-125b-1,cgr-mir-125b-2,hsa-mir-125b-1,ptr-mir-125b-1,ppy-mir-125b-1,mml-mir-125b-1,ggo-mir-125b-1,mne-mir-125b-1,age-mir-125b-1,lla-mir-125b-1,sla-mir-125b,bta-mir-125b-1,oar-mir-125b,eca-mir-125b,mdo-mir-125b-2,cja-mir-125,cfa-mir-125b-1,nle-mir-125b-1,ssc-mir-125b-1,pal-mir…	mmu-mir-125b-1	tgcgctcccctcagTCCCTGAGACCCTAACTTGTGAtgtttaccgtttaaatccACGGGTTAGGCTCTTGGGAGCTg	mmu-miR-125b-5p	TCCCTGAGACCCTAACTTGTGA	5'	Yes	gp1a	....((((..(((.(((..((..(((.((((((..(((..(((((.....))))).)))..)))))).)))..))..))).)))..)))).......	86	54.6	-43.7	99470	195091	175747	430530	559002	414492	181715	189488	191707	357953	457200	314978	high
86	155	mmu-miR-125b-1-3p	ACGGGTTAGGCTCTTGGGAGCT	22	chr9	+	41581923	41582019	tgttgcgctcccctcagTCCCTGAGACCCTAACTTGTGAtgtttaccgtttaaatccACGGGTTAGGCTCTTGGGAGCTgcgggtcgtgcctttgca	34	mmu-mir-125b-1,rno-mir-125b-1,cpo-mir-125b-1,dno-mir-125b-1,ocu-mir-125b-1,tch-mir-125b,oga-mir-125b-1,mmr-mir-125a,sbo-mir-125b-1,cgr-mir-125b-2,hsa-mir-125b-1,ptr-mir-125b-1,ppy-mir-125b-1,mml-mir-125b-1,ggo-mir-125b-1,mne-mir-125b-1,age-mir-125b-1,lla-mir-125b-1,sla-mir-125b,bta-mir-125b-1,oar-mir-125b,eca-mir-125b,mdo-mir-125b-2,cja-mir-125,cfa-mir-125b-1,nle-mir-125b-1,ssc-mir-125b-1,pal-mir…	mmu-mir-125b-1	tgcgctcccctcagTCCCTGAGACCCTAACTTGTGAtgtttaccgtttaaatccACGGGTTAGGCTCTTGGGAGCTg	mmu-miR-125b-1-3p	ACGGGTTAGGCTCTTGGGAGCT	3'	Yes	gp1a	....((((..(((.(((..((..(((.((((((..(((..(((((.....))))).)))..)))))).)))..))..))).)))..)))).......	86	54.6	-43.7	4112	6561	5868	9143	6287	8128	7511.94	6372.58	6400.87	7601.71	5142.05	6176.58	high
87	156	mmu-miR-126b-3p_R-1	CGCGTACCAAAAGTAATAATGT	22	chr2	-	26591363	26591420	attattactcacggtacgagtttgaagtgtcacagCGCGTACCAAAAGTAATAATGTg	2	mmu-mir-126b,cgr-mir-126b,	mmu-mir-126b	ATTATTACTCACGGTACGAGTTtgaagtgtcacagCGCGTACCAAAAGTAATAATGTG	mmu-miR-126b-3p	CGCGTACCAAAAGTAATAATGTG	3'	Diff	gp1a	(((((((((...((((((.((((((....))).))).))))))...)))))))))...	55	39.7	-19.3	0	6	0	0	5	6	0	5.82769	0	0	4.08943	4.55948	low
88	157	mmu-miR-126a-5p	CATTATTACTTTTGGTACGCG	21	chr2	+	26591354	26591433	cggtgacagcaCATTATTACTTTTGGTACGCGctgtgacacttcaaacTCGTACCGTGAGTAATAATGCgcggtcagcag	19	mmu-mir-126a,rno-mir-126a,cpo-mir-126,cfa-mir-126,nle-mir-126,mmr-mir-126,cgr-mir-126a,bta-mir-126,eca-mir-126,mdo-mir-126,efu-mir-126,ssc-mir-126,pal-mir-126,dno-mir-126,chi-mir-126,gga-mir-126,xtr-mir-126,xla-mir-126-1,xla-mir-126-2,	mmu-mir-126a	tgacagcaCATTATTACTTTTGGTACGCGctgtgacacttcaaacTCGTACCGTGAGTAATAATGCGcggtca	mmu-miR-126a-5p	CATTATTACTTTTGGTACGCG	5'	Yes	gp1a	...((((.((.((((((((((..(((((((.....(((....)))....)))))))..)))))))))).)).))))....	73	48.8	-32.1	17	44	13	40	106	49	31.0562	42.7364	14.1805	33.257	86.6959	37.2358	middle
88	158	mmu-miR-126a-3p_R-1	TCGTACCGTGAGTAATAATGC	21	chr2	+	26591354	26591433	cggtgacagcaCATTATTACTTTTGGTACGCGctgtgacacttcaaacTCGTACCGTGAGTAATAATGCgcggtcagcag	19	mmu-mir-126a,rno-mir-126a,cpo-mir-126,cfa-mir-126,nle-mir-126,mmr-mir-126,cgr-mir-126a,bta-mir-126,eca-mir-126,mdo-mir-126,efu-mir-126,ssc-mir-126,pal-mir-126,dno-mir-126,chi-mir-126,gga-mir-126,xtr-mir-126,xla-mir-126-1,xla-mir-126-2,	mmu-mir-126a	tgacagcaCATTATTACTTTTGGTACGCGctgtgacacttcaaacTCGTACCGTGAGTAATAATGCGcggtca	mmu-miR-126a-3p	TCGTACCGTGAGTAATAATGCG	3'	Diff	gp1a	...((((.((.((((((((((..(((((((.....(((....)))....)))))))..)))))))))).)).))))....	73	48.8	-32.1	103	224	143	227	403	304	188.164	217.567	155.986	188.733	329.608	231.014	middle
89	159	mmu-miR-127-5p_L-2R+1	GAAGCTCAGAGGGCTCTGATT	21	chr12	+	109592829	109592943	cgctttgatcactgtctccagcctgctGAAGCTCAGAGGGCTCTGATTcagaaagatcaTCGGATCCGTCTGAGCTTGGCTggtcggaagtctcatcatctgcctccctcgggtt	30	mmu-mir-127,cgr-mir-127,eca-mir-127,rno-mir-127,cpo-mir-127,pal-mir-127,dno-mir-127,ocu-mir-127,tch-mir-127,ppa-mir-127,dma-mir-127,hsa-mir-127,ptr-mir-127,ppy-mir-127,age-mir-127,lla-mir-127,sla-mir-127,bta-mir-127,mml-mir-127,mne-mir-127,cja-mir-127,cfa-mir-127,nle-mir-127,oga-mir-127,sbo-mir-127,efu-mir-127,ssc-mir-127,ggo-mir-127,chi-mir-127,oar-mir-127,	mmu-mir-127	ccagcctgCTGAAGCTCAGAGGGCTCTGATtcagaaagatcaTCGGATCCGTCTGAGCTTGGCTggtcgg	mmu-miR-127-5p	CTGAAGCTCAGAGGGCTCTGAT	5'	Diff	gp1a	.((..((((.(((.(((((((((.....(((((((((.((.((((((((.....))..)))))).)).)))))))))))))))..))))))...))))...))..((....))..	102	54.8	-42.6	184	785	625	589	849	1019	336.137	762.456	681.756	489.709	694.385	774.352	middle
89	160	mmu-miR-127-3p	TCGGATCCGTCTGAGCTTGGCT	22	chr12	+	109592829	109592943	cgctttgatcactgtctccagcctgctGAAGCTCAGAGGGCTCTGATTcagaaagatcaTCGGATCCGTCTGAGCTTGGCTggtcggaagtctcatcatctgcctccctcgggtt	30	mmu-mir-127,cgr-mir-127,eca-mir-127,rno-mir-127,cpo-mir-127,pal-mir-127,dno-mir-127,ocu-mir-127,tch-mir-127,ppa-mir-127,dma-mir-127,hsa-mir-127,ptr-mir-127,ppy-mir-127,age-mir-127,lla-mir-127,sla-mir-127,bta-mir-127,mml-mir-127,mne-mir-127,cja-mir-127,cfa-mir-127,nle-mir-127,oga-mir-127,sbo-mir-127,efu-mir-127,ssc-mir-127,ggo-mir-127,chi-mir-127,oar-mir-127,	mmu-mir-127	ccagcctgCTGAAGCTCAGAGGGCTCTGATtcagaaagatcaTCGGATCCGTCTGAGCTTGGCTggtcgg	mmu-miR-127-3p	TCGGATCCGTCTGAGCTTGGCT	3'	Yes	gp1a	.((..((((.(((.(((((((((.....(((((((((.((.((((((((.....))..)))))).)).)))))))))))))))..))))))...))))...))..((....))..	102	54.8	-42.6	32379	92729	53853	161417	166613	129469	59151	90065.9	58743.4	134206	136270	98385.3	high
90	161	mmu-miR-128-1-5p_R+2	CGGGGCCGTAGCACTGTCTGAGA	23	chr1	+	128202328	128202452	atattttacaataattggccttcttcctgagctgttggattCGGGGCCGTAGCACTGTCTGAGAggtttacatttcTCACAGTGAACCGGTCTCTTTttcagctgcttcctgacttctttttact	32	mmu-mir-128-1,eca-mir-128-2,cja-mir-128-1,rno-mir-128-1,hsa-mir-128-1,bta-mir-128-1,ptr-mir-128-1,ppy-mir-128-1,mml-mir-128a,ssc-mir-128-1,ppa-mir-128,age-mir-128,sla-mir-128,cpo-mir-128-1,mdo-mir-128b,cfa-mir-128-1,pal-mir-128,dno-mir-128-1,ocu-mir-128a,tch-mir-128,nle-mir-128-1,oga-mir-128-1,cgr-mir-128,efu-mir-128b,ggo-mir-128,chi-mir-128,gga-mir-128-1,aca-mir-128-2,cli-mir-128-1,tgu-mir-128-1…	mmu-mir-128-1	gttggattCGGGGCCGTAGCACTGTCTGAgaggtttacatttcTCACAGTGAACCGGTCTCTTTttcagc	mmu-miR-128-1-5p	CGGGGCCGTAGCACTGTCTGA	5'	Diff	gp1a	...........(((..((...((.....((((.((((((...(((((((...((((((..((((..(....)..))))))))))...)))))))...)))))).))))...))...))..)))..	112	43.2	-34.7	33	57	29	66	40	52	60.2855	55.363	31.6335	54.874	32.7154	39.5155	middle
90	162	mmu-miR-128-3p	TCACAGTGAACCGGTCTCTTT	21	chr1	+	128202328	128202452	atattttacaataattggccttcttcctgagctgttggattCGGGGCCGTAGCACTGTCTGAGAggtttacatttcTCACAGTGAACCGGTCTCTTTttcagctgcttcctgacttctttttact	32	mmu-mir-128-1,eca-mir-128-2,cja-mir-128-1,rno-mir-128-1,hsa-mir-128-1,bta-mir-128-1,ptr-mir-128-1,ppy-mir-128-1,mml-mir-128a,ssc-mir-128-1,ppa-mir-128,age-mir-128,sla-mir-128,cpo-mir-128-1,mdo-mir-128b,cfa-mir-128-1,pal-mir-128,dno-mir-128-1,ocu-mir-128a,tch-mir-128,nle-mir-128-1,oga-mir-128-1,cgr-mir-128,efu-mir-128b,ggo-mir-128,chi-mir-128,gga-mir-128-1,aca-mir-128-2,cli-mir-128-1,tgu-mir-128-1…	mmu-mir-128-1	gttggattCGGGGCCGTAGCACTGTCTGAgaggtttacatttcTCACAGTGAACCGGTCTCTTTttcagc	mmu-miR-128-3p	TCACAGTGAACCGGTCTCTTT	3'	Yes	gp1a	...........(((..((...((.....((((.((((((...(((((((...((((((..((((..(....)..))))))))))...)))))))...)))))).))))...))...))..)))..	112	43.2	-34.7	360	486	479	1309	736	903	657.66	472.043	522.498	1088.33	601.964	686.202	middle
91	163	mmu-miR-128-3p	TCACAGTGAACCGGTCTCTTT	21	chr9	-	112118631	112118715	tgtgcagtgggaaggggggccgatgcactgtaagagagtgagtagcaggtcTCACAGTGAACCGGTCTCTTTccctactgtgtca	23	mmu-mir-128-2,rno-mir-128-2,cpo-mir-128-2,cfa-mir-128-2,dno-mir-128-2,ocu-mir-128b,nle-mir-128-2,oga-mir-128-2,mmr-mir-128,hsa-mir-128-2,ppy-mir-128-2,mml-mir-128b,bta-mir-128-2,eca-mir-128-1,ptr-mir-128-2,mdo-mir-128a,cja-mir-128-2,efu-mir-128a,ssc-mir-128-2,gga-mir-128-2,aca-mir-128-1,cli-mir-128-2,xtr-mir-128-2,	mmu-mir-128-2	cagtgggaagGGGGGCCGATGCACTGTAAGAGAgtgagtagcaggtcTCACAGTGAACCGGTCTCTTTccctactg	mmu-miR-128-3p	TCACAGTGAACCGGTCTCTTT	3'	Yes	gp1a	.(..(((((((.(..(((((((...((((((..((((.((.....))..))))))))))...)))))))..).)))))))..)..	82	55.3	-38.1	360	486	479	1309	736	903	657.66	472.043	522.498	1088.33	601.964	686.202	middle
92	164	mmu-miR-129-5p	CTTTTTGCGGTCTGGGCTTGC	21	chr2	-	94241361	94241457	agactgcctttcgcgaatCTTTTTGCGGTCTGGGCTTGCtgtacataactcaatagccggAAGCCCTTACCCCAAAAAGCATtcgcggagggcgcgc	26	mmu-mir-129-2,rno-mir-129-2,cpo-mir-129-2,hsa-mir-129-2,ppy-mir-129-2,bta-mir-129-2,eca-mir-129b,ptr-mir-129-2,mml-mir-129-2,cja-mir-129-1,cfa-mir-129-2,efu-mir-129a,ssc-mir-129a,ggo-mir-129,pal-mir-129a,dno-mir-129-2,ocu-mir-129-2,chi-mir-129,tch-mir-129-2,gga-mir-129-1,gmo-mir-129-1,dre-mir-129-4,dre-mir-129-2,tgu-mir-129,xtr-mir-129-1,hhi-mir-129a,	mmu-mir-129-2	tgcctttcgcgaatCTTTTTGCGGTCTGGGCTTGCtgtacataactcaatagccggAAGCCCTTACCCCAAAAAGCATtcgcggagggcg	mmu-miR-129-5p	CTTTTTGCGGTCTGGGCTTGC	5'	Yes	gp1a	.....((((((((((((((((((((.(((..(((((((((((..........)))))...))))))..))).))))))).)))))))))))))....	88	54.6	-48.2	227	261	495.5	1323.5	651.5	869.5	414.691	253.504	540.496	1100.39	532.852	660.745	middle
92	165	mmu-miR-129-2-3p	AAGCCCTTACCCCAAAAAGCAT	22	chr2	-	94241361	94241457	agactgcctttcgcgaatCTTTTTGCGGTCTGGGCTTGCtgtacataactcaatagccggAAGCCCTTACCCCAAAAAGCATtcgcggagggcgcgc	26	mmu-mir-129-2,rno-mir-129-2,cpo-mir-129-2,hsa-mir-129-2,ppy-mir-129-2,bta-mir-129-2,eca-mir-129b,ptr-mir-129-2,mml-mir-129-2,cja-mir-129-1,cfa-mir-129-2,efu-mir-129a,ssc-mir-129a,ggo-mir-129,pal-mir-129a,dno-mir-129-2,ocu-mir-129-2,chi-mir-129,tch-mir-129-2,gga-mir-129-1,gmo-mir-129-1,dre-mir-129-4,dre-mir-129-2,tgu-mir-129,xtr-mir-129-1,hhi-mir-129a,	mmu-mir-129-2	tgcctttcgcgaatCTTTTTGCGGTCTGGGCTTGCtgtacataactcaatagccggAAGCCCTTACCCCAAAAAGCATtcgcggagggcg	mmu-miR-129-2-3p	AAGCCCTTACCCCAAAAAGCAT	3'	Yes	gp1a	.....((((((((((((((((((((.(((..(((((((((((..........)))))...))))))..))).))))))).)))))))))))))....	88	54.6	-48.2	133.5	202.5	186.5	337	560	397	243.882	196.684	203.436	280.19	458.016	301.686	middle
93	166	mmu-miR-129-5p	CTTTTTGCGGTCTGGGCTTGC	21	chr6	+	29022608	29022698	gctgtctcctttggatCTTTTTGCGGTCTGGGCTTGCtgttctctcgacagtagtcaggAAGCCCTTACCCCAAAAAGTATctacgggagg	23	mmu-mir-129-1,rno-mir-129-1,cpo-mir-129-1,cgr-mir-129,hsa-mir-129-1,ppy-mir-129-1,mml-mir-129-1,bta-mir-129-1,eca-mir-129a,ptr-mir-129-1,mdo-mir-129,cja-mir-129-2,cfa-mir-129-1,tch-mir-129-1,efu-mir-129b,ssc-mir-129b,pal-mir-129b,dno-mir-129-1,ocu-mir-129-1,oni-mir-129-4,gmo-mir-129-2,tni-mir-129-2,fru-mir-129-2,	mmu-mir-129-1	tggatCTTTTTGCGGTCTGGGCTTGCtgttctctcgacagtagtcaggAAGCCCTTACCCCAAAAAGTATcta	mmu-miR-129-5p	CTTTTTGCGGTCTGGGCTTGC	5'	Yes	gp1a	.....((((..((((((((((((.(((..((((((.(((..((((....)).)).))).))))))..))).))))))).)))))..)))).	85	51.6	-40.5	227	261	495.5	1323.5	651.5	869.5	414.691	253.504	540.496	1100.39	532.852	660.745	middle
93	167	mmu-miR-129-1-3p_1ss20TC	AAGCCCTTACCCCAAAAAGCAT	22	chr6	+	29022608	29022698	gctgtctcctttggatCTTTTTGCGGTCTGGGCTTGCtgttctctcgacagtagtcaggAAGCCCTTACCCCAAAAAGTATctacgggagg	23	mmu-mir-129-1,rno-mir-129-1,cpo-mir-129-1,cgr-mir-129,hsa-mir-129-1,ppy-mir-129-1,mml-mir-129-1,bta-mir-129-1,eca-mir-129a,ptr-mir-129-1,mdo-mir-129,cja-mir-129-2,cfa-mir-129-1,tch-mir-129-1,efu-mir-129b,ssc-mir-129b,pal-mir-129b,dno-mir-129-1,ocu-mir-129-1,oni-mir-129-4,gmo-mir-129-2,tni-mir-129-2,fru-mir-129-2,	mmu-mir-129-1	tggatCTTTTTGCGGTCTGGGCTTGCtgttctctcgacagtagtcaggAAGCCCTTACCCCAAAAAGTATcta	mmu-miR-129-1-3p	AAGCCCTTACCCCAAAAAGTAT	3'	Diff	gp1a	.....((((..((((((((((((.(((..((((((.(((..((((....)).)).))).))))))..))).))))))).)))))..)))).	85	51.6	-40.5	133.5	202.5	186.5	337	560	397	243.882	196.684	203.436	280.19	458.016	301.686	middle
94	168	mmu-miR-130b-5p	ACTCTTTCCCTGTTGCACTACT	22	chr16	-	17124061	17124142	ggcttgttggacACTCTTTCCCTGTTGCACTACTgtgggcctctgggaagCAGTGCAATGATGAAAGGGCATctgtcgggcc	11	mmu-mir-130b,rno-mir-130b,cpo-mir-130b,cgr-mir-130b,bta-mir-130b,eca-mir-130b,cfa-mir-130b,dno-mir-130b,ocu-mir-130b,chi-mir-130b,oni-mir-130b,	mmu-mir-130b	ggcttgttggacACTCTTTCCCTGTTGCACTACTgtgggcctctgggaagCAGTGCAATGATGAAAGGGCATctgtcgggcc	mmu-miR-130b-5p	ACTCTTTCCCTGTTGCACTACT	5'	Yes	gp1a	(((..(..(((..(((((((...((((((((...((...((....))..))))))))))...)))))))..)))..)..)))	82	56.1	-29.7	95	50	147	263	217	187	173.549	48.5641	160.349	218.665	177.481	142.104	middle
94	169	mmu-miR-130b-3p	CAGTGCAATGATGAAAGGGCAT	22	chr16	-	17124061	17124142	ggcttgttggacACTCTTTCCCTGTTGCACTACTgtgggcctctgggaagCAGTGCAATGATGAAAGGGCATctgtcgggcc	11	mmu-mir-130b,rno-mir-130b,cpo-mir-130b,cgr-mir-130b,bta-mir-130b,eca-mir-130b,cfa-mir-130b,dno-mir-130b,ocu-mir-130b,chi-mir-130b,oni-mir-130b,	mmu-mir-130b	ggcttgttggacACTCTTTCCCTGTTGCACTACTgtgggcctctgggaagCAGTGCAATGATGAAAGGGCATctgtcgggcc	mmu-miR-130b-3p	CAGTGCAATGATGAAAGGGCAT	3'	Yes	gp1a	(((..(..(((..(((((((...((((((((...((...((....))..))))))))))...)))))))..)))..)..)))	82	56.1	-29.7	163	241	243	344	247	318	297.774	234.079	265.067	286.01	202.018	241.653	middle
95	170	mmu-miR-130a-5p	GCTCTTTTCACATTGTGCTACT	22	chr2	-	84741104	84741190	tgctgctggccggaGCTCTTTTCACATTGTGCTACTgtctaacgtgtaccgagCAGTGCAATGTTAAAAGGGCATcggccttgtagt	20	mmu-mir-130a,rno-mir-130a,cpo-mir-130a,cgr-mir-130a,hsa-mir-130a,ppy-mir-130a,ggo-mir-130a,ppa-mir-130a,mne-mir-130a,ptr-mir-130a,mdo-mir-130a,mml-mir-130a,ssc-mir-130a,dno-mir-130a,ocu-mir-130a,chi-mir-130a,tch-mir-130a,nle-mir-130a,dma-mir-130a,oga-mir-130a,	mmu-mir-130a	gaGCTCTTTTCACATTGTGCTACTgtctaacgtgtaccgagCAGTGCAATGTTAAAAGGGCATc	mmu-miR-130a-5p	GCTCTTTTCACATTGTGCTACT	5'	Yes	gp1a	.(((((.(((((..((((((((.((((((..((.((...............)).))..)))))).))))))))..)))))..)))))	86	50.6	-39.8	9	6	11	8	14	9	16.4415	5.82769	11.9989	6.6514	11.4504	6.83923	middle
95	171	mmu-miR-130a-3p	CAGTGCAATGTTAAAAGGGCAT	22	chr2	-	84741104	84741190	tgctgctggccggaGCTCTTTTCACATTGTGCTACTgtctaacgtgtaccgagCAGTGCAATGTTAAAAGGGCATcggccttgtagt	20	mmu-mir-130a,rno-mir-130a,cpo-mir-130a,cgr-mir-130a,hsa-mir-130a,ppy-mir-130a,ggo-mir-130a,ppa-mir-130a,mne-mir-130a,ptr-mir-130a,mdo-mir-130a,mml-mir-130a,ssc-mir-130a,dno-mir-130a,ocu-mir-130a,chi-mir-130a,tch-mir-130a,nle-mir-130a,dma-mir-130a,oga-mir-130a,	mmu-mir-130a	gaGCTCTTTTCACATTGTGCTACTgtctaacgtgtaccgagCAGTGCAATGTTAAAAGGGCATc	mmu-miR-130a-3p	CAGTGCAATGTTAAAAGGGCAT	3'	Yes	gp1a	.(((((.(((((..((((((((.((((((..((.((...............)).))..)))))).))))))))..)))))..)))))	86	50.6	-39.8	828	2022	1046	1785	2205	1906	1512.62	1963.93	1140.99	1484.09	1803.44	1448.4	middle
96	172	mmu-miR-132-5p_L-1R+1	ACCGTGGCTTTCGATTGTTACT	22	chr11	+	75173665	75173765	ccgcccccgcgtctccagggcaACCGTGGCTTTCGATTGTTACTgtgggaaccggaggTAACAGTCTACAGCCATGGTCGccccgcagcacgcccacgctc	20	mmu-mir-132,rno-mir-132,cpo-mir-132,pal-mir-132,oga-mir-132,mmr-mir-132,cgr-mir-132,hsa-mir-132,ppy-mir-132,mml-mir-132,bta-mir-132,eca-mir-132,mdo-mir-132,cja-mir-132,cfa-mir-132,efu-mir-132,ssc-mir-132,dno-mir-132,nle-mir-132,gga-mir-132a,	mmu-mir-132	gggcAACCGTGGCTTTCGATTGTTACtgtgggaaccggaggTAACAGTCTACAGCCATGGTCGccc	mmu-miR-132-5p	AACCGTGGCTTTCGATTGTTAC	5'	Diff	gp1a	..((....((((((...((((.(((((((((...((((((((((.(((...)))..))))))))))...))))))))).))))...)).))))....))..	97	65.3	-45.8	56	107	80	236	260	184	102.303	103.927	87.2648	196.216	212.65	139.824	middle
96	173	mmu-miR-132-3p	TAACAGTCTACAGCCATGGTCG	22	chr11	+	75173665	75173765	ccgcccccgcgtctccagggcaACCGTGGCTTTCGATTGTTACTgtgggaaccggaggTAACAGTCTACAGCCATGGTCGccccgcagcacgcccacgctc	20	mmu-mir-132,rno-mir-132,cpo-mir-132,pal-mir-132,oga-mir-132,mmr-mir-132,cgr-mir-132,hsa-mir-132,ppy-mir-132,mml-mir-132,bta-mir-132,eca-mir-132,mdo-mir-132,cja-mir-132,cfa-mir-132,efu-mir-132,ssc-mir-132,dno-mir-132,nle-mir-132,gga-mir-132a,	mmu-mir-132	gggcAACCGTGGCTTTCGATTGTTACtgtgggaaccggaggTAACAGTCTACAGCCATGGTCGccc	mmu-miR-132-3p	TAACAGTCTACAGCCATGGTCG	3'	Yes	gp1a	..((....((((((...((((.(((((((((...((((((((((.(((...)))..))))))))))...))))))))).))))...)).))))....))..	97	65.3	-45.8	300	582	815	1945	1947	1737	548.05	565.286	889.01	1617.12	1592.42	1319.97	middle
97	174	mmu-miR-133a-5p	GCTGGTAAAATGGAACCAAAT	21	chr2	+	180398379	180398482	agaagccaaatgctttgctgaaGCTGGTAAAATGGAACCAAATcagctgttggatggatTTGGTCCCCTTCAACCAGCTGTagctgcgcattgatcacgccgca	22	mmu-mir-133a-2,cpo-mir-133a-1,oni-mir-133a-2,hsa-mir-133a-2,ppy-mir-133c,mml-mir-133c,bta-mir-133a-1,ptr-mir-133a-2,mdo-mir-133a-2,efu-mir-133-1,ssc-mir-133a-1,pal-mir-133a-1,dno-mir-133a-1,chi-mir-133a,oar-mir-133,gga-mir-133a-2,gmo-mir-133a-2,dre-mir-133a-2,aca-mir-133a-1,cli-mir-133a-2,xtr-mir-133c,ola-mir-133-2,	mmu-mir-133a-2	agaagccaaatgctttgctgaaGCTGGTAAAATGGAACCAAATcagctgttggatggaTTTGGTCCCCTTCAACCAGCTGtagctgcgcattgatcacgccgca	mmu-miR-133a-5p	GCTGGTAAAATGGAACCAAAT	5'	Yes	gp1a	........(((((...(((..(((((((..((.((.((((((((..(.....)...)))))))).)).))..)))))))..)))...)))))............	84	49	-34.2	9	14	10.5	12.5	14	11.5	16.4415	13.5979	11.4535	10.3928	11.4504	8.73901	middle
97	175	mmu-miR-133a-3p_L-1R+1	TTGGTCCCCTTCAACCAGCTGT	22	chr2	+	180398379	180398482	agaagccaaatgctttgctgaaGCTGGTAAAATGGAACCAAATcagctgttggatggatTTGGTCCCCTTCAACCAGCTGTagctgcgcattgatcacgccgca	22	mmu-mir-133a-2,cpo-mir-133a-1,oni-mir-133a-2,hsa-mir-133a-2,ppy-mir-133c,mml-mir-133c,bta-mir-133a-1,ptr-mir-133a-2,mdo-mir-133a-2,efu-mir-133-1,ssc-mir-133a-1,pal-mir-133a-1,dno-mir-133a-1,chi-mir-133a,oar-mir-133,gga-mir-133a-2,gmo-mir-133a-2,dre-mir-133a-2,aca-mir-133a-1,cli-mir-133a-2,xtr-mir-133c,ola-mir-133-2,	mmu-mir-133a-2	agaagccaaatgctttgctgaaGCTGGTAAAATGGAACCAAATcagctgttggatggaTTTGGTCCCCTTCAACCAGCTGtagctgcgcattgatcacgccgca	mmu-miR-133a-3p	TTTGGTCCCCTTCAACCAGCTG	3'	Diff	gp1a	........(((((...(((..(((((((..((.((.((((((((..(.....)...)))))))).)).))..)))))))..)))...)))))............	84	49	-34.2	11.5	18.5	86	28.5	77	42.5	21.0086	17.9687	93.8097	23.6956	62.9772	32.2964	middle
98	176	mmu-miR-133a-5p	GCTGGTAAAATGGAACCAAAT	21	chr18	-	10782898	10782985	caatgctttgctaaaGCTGGTAAAATGGAACCAAATcgcctcttcaatggatTTGGTCCCCTTCAACCAGCTGTagctatgcattgat	38	mmu-mir-133a-1,rno-mir-133a,cpo-mir-133a-2,pal-mir-133a-2,ocu-mir-133a,hsa-mir-133a-1,ptr-mir-133a-1,ppy-mir-133a,mml-mir-133a,ggo-mir-133a,ppa-mir-133a,mne-mir-133a,age-mir-133a,lla-mir-133a,sla-mir-133a,bta-mir-133a-2,cfa-mir-133a,eca-mir-133a,eca-mir-133a-2,mdo-mir-133a-1,cja-mir-133a-1,cfa-mir-133c,efu-mir-133-2,ssc-mir-133a-2,dno-mir-133a-2,gga-mir-133a-1,oni-mir-133a-1,gmo-mir-133a-1,dre-mi…	mmu-mir-133a-1	gctaaaGCTGGTAAAATGGAACCAAATcgcctcttcaatggaTTTGGTCCCCTTCAACCAGCTGtagc	mmu-miR-133a-5p	GCTGGTAAAATGGAACCAAAT	5'	Yes	gp1a	((((((...((((.(((((((..((.((.((((((((............)))))))).)).))..))))))).))))...))))))..	86	43.2	-37.9	9	14	10.5	12.5	14	11.5	16.4415	13.5979	11.4535	10.3928	11.4504	8.73901	middle
98	177	mmu-miR-133a-3p_L-1R+1	TTGGTCCCCTTCAACCAGCTGT	22	chr18	-	10782898	10782985	caatgctttgctaaaGCTGGTAAAATGGAACCAAATcgcctcttcaatggatTTGGTCCCCTTCAACCAGCTGTagctatgcattgat	38	mmu-mir-133a-1,rno-mir-133a,cpo-mir-133a-2,pal-mir-133a-2,ocu-mir-133a,hsa-mir-133a-1,ptr-mir-133a-1,ppy-mir-133a,mml-mir-133a,ggo-mir-133a,ppa-mir-133a,mne-mir-133a,age-mir-133a,lla-mir-133a,sla-mir-133a,bta-mir-133a-2,cfa-mir-133a,eca-mir-133a,eca-mir-133a-2,mdo-mir-133a-1,cja-mir-133a-1,cfa-mir-133c,efu-mir-133-2,ssc-mir-133a-2,dno-mir-133a-2,gga-mir-133a-1,oni-mir-133a-1,gmo-mir-133a-1,dre-mi…	mmu-mir-133a-1	gctaaaGCTGGTAAAATGGAACCAAATcgcctcttcaatggaTTTGGTCCCCTTCAACCAGCTGtagc	mmu-miR-133a-3p	TTTGGTCCCCTTCAACCAGCTG	3'	Diff	gp1a	((((((...((((.(((((((..((.((.((((((((............)))))))).)).))..))))))).))))...))))))..	86	43.2	-37.9	11.5	18.5	86	28.5	77	42.5	21.0086	17.9687	93.8097	23.6956	62.9772	32.2964	middle
99	178	mmu-miR-133b-3p_R-1	TTTGGTCCCCTTCAACCAGCT	21	chr1	+	20682769	20682887	cctccaaagggagtggccccctgctctggctggtcaaacggaaccaagtccgtcttcctgagaggTTTGGTCCCCTTCAACCAGCTacagcagggctggcaaagctcaatatttggaga	18	mmu-mir-133b,rno-mir-133b,bta-mir-133b,cfa-mir-133b,cpo-mir-133b,ocu-mir-133b,eca-mir-133b,mdo-mir-133b,ppy-mir-133b,cja-mir-133b,ssc-mir-133b,pal-mir-133b,dno-mir-133b,chi-mir-133b,gga-mir-133b,cli-mir-133b,xtr-mir-133b,xla-mir-133b,	mmu-mir-133b	cctccaaagggagtggccccctgctctgGCTGGTCAAACGGAACCAAGTCcgtcttcctgagaggTTTGGTCCCCTTCAACCAGCTAcagcagggctggcaaagctcaatatttggaga	mmu-miR-133b-3p	TTTGGTCCCCTTCAACCAGCTA	3'	Diff	gp1a	.(((((((..((((.((((((((((.((((((((..((.((.((((((.((.((((...)))))))))))).)).))..)))))))).)))))))..)))...))))....))))))).	117	56.3	-59.1	0	0	18	0	5	0	0	0	19.6346	0	4.08943	0	middle
100	179	mmu-miR-134-5p	TGTGACTGGTTGACCAGAGGGG	22	chr12	+	109734136	109734215	ttcagggtgTGTGACTGGTTGACCAGAGGGGcgtgcactctgttcaccCTGTGGGCCACCTAGTCACCAaccctcagcat	15	mmu-mir-134,rno-mir-134,cpo-mir-134,cgr-mir-134,hsa-mir-134,ppy-mir-134,ppa-mir-134,mne-mir-134,eca-mir-134,ptr-mir-134,mml-mir-134,cja-mir-134,cfa-mir-134,ggo-mir-134,ocu-mir-134,	mmu-mir-134	agggtgTGTGACTGGTTGACCAGAGGGGcgtgcactctgttcaccCTGTGGGCCACCTAGTCACCaaccct	mmu-miR-134-5p	TGTGACTGGTTGACCAGAGGGG	5'	Yes	gp1a	...(((((..((((((((.((.(((.((((....((.....))...)))).)))..)).))))))))..)))))......	71	58.8	-35.1	1236	4417	3319	5690	5370	5712	2257.96	4290.15	3620.4	4730.8	4392.05	4340.63	middle
100	180	mmu-miR-134-3p_R+1	CTGTGGGCCACCTAGTCACCA	21	chr12	+	109734136	109734215	ttcagggtgTGTGACTGGTTGACCAGAGGGGcgtgcactctgttcaccCTGTGGGCCACCTAGTCACCAaccctcagcat	15	mmu-mir-134,rno-mir-134,cpo-mir-134,cgr-mir-134,hsa-mir-134,ppy-mir-134,ppa-mir-134,mne-mir-134,eca-mir-134,ptr-mir-134,mml-mir-134,cja-mir-134,cfa-mir-134,ggo-mir-134,ocu-mir-134,	mmu-mir-134	agggtgTGTGACTGGTTGACCAGAGGGGcgtgcactctgttcaccCTGTGGGCCACCTAGTCACCaaccct	mmu-miR-134-3p	CTGTGGGCCACCTAGTCACC	3'	Diff	gp1a	...(((((..((((((((.((.(((.((((....((.....))...)))).)))..)).))))))))..)))))......	71	58.8	-35.1	0	38	19	48	90	76	0	36.9087	20.7254	39.9084	73.6097	57.7535	middle
101	181	mmu-miR-135a-5p	TATGGCTTTTTATTCCTATGTGA	23	chr9	+	106154124	106154213	aggcctcactgttctcTATGGCTTTTTATTCCTATGTGAttctattgctcgctcatatagggattggagccgtggcgtacggtgaggata	19	mmu-mir-135a-1,cpo-mir-135a-1,hsa-mir-135a-1,ppy-mir-135a-1,mml-mir-135a-1,age-mir-135-1,lla-mir-135-1,bta-mir-135a-1,chi-mir-135a,eca-mir-135a,ptr-mir-135a-1,cja-mir-135,cfa-mir-135a-1,ssc-mir-135-1,pal-mir-135-2,dno-mir-135a-1,ocu-mir-135a-1,tch-mir-135a,ppa-mir-135-1,	mmu-mir-135a-1	aggcctcactgttctcTATGGCTTTTTATTCCTATGTGAttctattgctcgctcaTATAGGGATTGGAGCCGTGGCGtacggtgaggata	mmu-miR-135a-5p	TATGGCTTTTTATTCCTATGTGA	5'	Yes	gp1a	...(((((((((...(((((((((...((((((((((((.............))))))))))))..)))))))))...)))))))))...	84	46.7	-42.2	7.5	13	22.5	18.5	20	16	13.7012	12.6267	24.5432	15.3814	16.3577	12.1586	middle
102	182	mmu-miR-135a-5p	TATGGCTTTTTATTCCTATGTGA	23	chr10	-	92072054	92072187	caagataaattcactctagtgcttTATGGCTTTTTATTCCTATGTGAtcgtaataaagtctcATGTAGGGATGGAAGCCATGAAatacattgtgaaaattcatcaactaagaaggggccatcaggatagcaaac	26	mmu-mir-135a-2,rno-mir-135a,cpo-mir-135a-2,dno-mir-135a-2,ocu-mir-135a-2,hsa-mir-135a-2,bta-mir-135a-2,eca-mir-135a-2,ptr-mir-135a-2,ppy-mir-135a-2,mml-mir-135a-2,ssc-mir-135-2,ggo-mir-135a,ppa-mir-135-2,age-mir-135-2,mdo-mir-135a,cfa-mir-135a-2,efu-mir-135,pal-mir-135-1,sha-mir-135a,gga-mir-135a-2,aca-mir-135-2,cli-mir-135-2,tgu-mir-135a-1,xtr-mir-135-1,xla-mir-135,	mmu-mir-135a-2	agataaattcactctagtgcttTATGGCTTTTTATTCCTATGTGAtcgtaataaagtctcaTGTAGGGATGGAAGCCATGAAatacattgtgaaaattca	mmu-miR-135a-5p	TATGGCTTTTTATTCCTATGTGA	5'	Yes	gp1a	...(((.(((((((....((..(((((((((.(..(((((((..(((.............)))..)))))))..))))))))))..))...))))..))).)))..(((.....((....))....))).....	101	36.6	-33.1	7.5	13	22.5	18.5	20	16	13.7012	12.6267	24.5432	15.3814	16.3577	12.1586	middle
102	183	mmu-miR-135a-2-3p_L+1	ATGTAGGGATGGAAGCCATGAA	22	chr10	-	92072054	92072187	caagataaattcactctagtgcttTATGGCTTTTTATTCCTATGTGAtcgtaataaagtctcATGTAGGGATGGAAGCCATGAAatacattgtgaaaattcatcaactaagaaggggccatcaggatagcaaac	26	mmu-mir-135a-2,rno-mir-135a,cpo-mir-135a-2,dno-mir-135a-2,ocu-mir-135a-2,hsa-mir-135a-2,bta-mir-135a-2,eca-mir-135a-2,ptr-mir-135a-2,ppy-mir-135a-2,mml-mir-135a-2,ssc-mir-135-2,ggo-mir-135a,ppa-mir-135-2,age-mir-135-2,mdo-mir-135a,cfa-mir-135a-2,efu-mir-135,pal-mir-135-1,sha-mir-135a,gga-mir-135a-2,aca-mir-135-2,cli-mir-135-2,tgu-mir-135a-1,xtr-mir-135-1,xla-mir-135,	mmu-mir-135a-2	agataaattcactctagtgcttTATGGCTTTTTATTCCTATGTGAtcgtaataaagtctcaTGTAGGGATGGAAGCCATGAAatacattgtgaaaattca	mmu-miR-135a-2-3p	TGTAGGGATGGAAGCCATGAA	3'	Diff	gp1a	...(((.(((((((....((..(((((((((.(..(((((((..(((.............)))..)))))))..))))))))))..))...))))..))).)))..(((.....((....))....))).....	101	36.6	-33.1	10	0	7	0	0	10	18.2683	0	7.63567	0	0	7.59914	middle
103	184	mmu-miR-136-5p	ACTCCATTTGTTTTGATGATGG	22	chr12	+	109595312	109595403	ttggatgagccctcggaggACTCCATTTGTTTTGATGATGGattcttaagctcCATCATCGTCTCAAATGAGTCTtcagagggttctatcat	23	mmu-mir-136,rno-mir-136,cpo-mir-136,cfa-mir-136,pal-mir-136,tch-mir-136,hsa-mir-136,ptr-mir-136,ppy-mir-136,ggo-mir-136,ppa-mir-136,bta-mir-136,eca-mir-136,mml-mir-136,efu-mir-136,ssc-mir-136,dno-mir-136,ocu-mir-136,chi-mir-136,oar-mir-136,nle-mir-136,oga-mir-136,mmr-mir-136,	mmu-mir-136	gaggACTCCATTTGTTTTGATGATGGattcttaagctccATCATCGTCTCAAATGAGTCTTc	mmu-miR-136-5p	ACTCCATTTGTTTTGATGATGG	5'	Yes	gp1a	...(((((((((((.(((((((.((((((...((((((((((.........))))))))))...))))))))))))).)))))))).)))..	87	43.5	-48.1	97	326	196	193	360	314	177.203	316.638	213.799	160.465	294.439	238.613	middle
103	185	mmu-miR-136-3p_L+1R-1	CATCATCGTCTCAAATGAGTCT	22	chr12	+	109595312	109595403	ttggatgagccctcggaggACTCCATTTGTTTTGATGATGGattcttaagctcCATCATCGTCTCAAATGAGTCTtcagagggttctatcat	23	mmu-mir-136,rno-mir-136,cpo-mir-136,cfa-mir-136,pal-mir-136,tch-mir-136,hsa-mir-136,ptr-mir-136,ppy-mir-136,ggo-mir-136,ppa-mir-136,bta-mir-136,eca-mir-136,mml-mir-136,efu-mir-136,ssc-mir-136,dno-mir-136,ocu-mir-136,chi-mir-136,oar-mir-136,nle-mir-136,oga-mir-136,mmr-mir-136,	mmu-mir-136	gaggACTCCATTTGTTTTGATGATGGattcttaagctccATCATCGTCTCAAATGAGTCTTc	mmu-miR-136-3p	ATCATCGTCTCAAATGAGTCTT	3'	Diff	gp1a	...(((((((((((.(((((((.((((((...((((((((((.........))))))))))...))))))))))))).)))))))).)))..	87	43.5	-48.1	658	1902	1489	1385	1956	2268	1202.06	1847.38	1624.22	1151.52	1599.78	1723.49	middle
104	186	mmu-miR-137-3p	TTATTGCTTAAGAATACGCGTAG	23	chr3	+	118433843	118433947	ggccctctgactctcttcggtgacgggtattcttgggtggataatacggattacgttgTTATTGCTTAAGAATACGCGTAGtcgaggagagtaccagcggcaggc	25	mmu-mir-137,eca-mir-137,rno-mir-137,cgr-mir-137,hsa-mir-137,bta-mir-137,ppy-mir-137,mml-mir-137,ptr-mir-137,mdo-mir-137a,cja-mir-137,ssc-mir-137,dno-mir-137,ocu-mir-137,chi-mir-137,gga-mir-137,oni-mir-137a,dre-mir-137-1,aca-mir-137a,cli-mir-137a,tgu-mir-137,xtr-mir-137-3,xtr-mir-137-2,xtr-mir-137-1,ccr-mir-137,	mmu-mir-137	cttcggtgACGGGTATTCTTGGGTGGATAATacggattacgttgTTATTGCTTAAGAATACGCGTAGtcgagg	mmu-miR-137-3p	TTATTGCTTAAGAATACGCGTAG	3'	Yes	gp1a	.(((((...(((((((((((..(((.((((((((..(..(.(((((((.....)).))))))..)..)))))))).)))..)))))))))))...)).)))....	100	51.4	-49.9	0	7	0	6	0	6	0	6.79897	0	4.98855	0	4.55948	low
105	187	mmu-miR-138-5p	AGCTGGTGTTGTGAATCAGGCCG	23	chr9	+	122682876	122682974	ctctagcatggtgttgtgggacAGCTGGTGTTGTGAATCAGGCCGttgccaatcagagaacggctacttcacaacaccagggccacactgcactgcaag	12	mmu-mir-138-1,rno-mir-138-1,cpo-mir-138-1,hsa-mir-138-1,eca-mir-138-2,cfa-mir-138a,efu-mir-138a,ssc-mir-138,pal-mir-138-1,ocu-mir-138-1,oga-mir-138-1,mmr-mir-138-1,	mmu-mir-138-1	ctctagcatggtgttgtgggacAGCTGGTGTTGTGAATCAGGCCGttgccaatcagagaaCGGCTACTTCACAACACCAGGGccacactgcactgcaag	mmu-miR-138-5p	AGCTGGTGTTGTGAATCAGGCCG	5'	Yes	gp1a	.....((..((((..(((((....(((((((((((((...(((((((...........)))))))..)))))))))))))..)).)))..))))))...	91	54.5	-43.7	15.5	35	25.5	42.5	40.5	66	28.3159	33.9948	27.8157	35.3355	33.1244	50.1543	middle
106	188	mmu-miR-138-5p	AGCTGGTGTTGTGAATCAGGCCG	23	chr8	+	94324294	94324401	ttctggtatggttgctgcAGCTGGTGTTGTGAATCAGGCCGacgagcagcgcatcctcttacccggctatttcacgacaccagggttgcaccctacccatcctctcca	22	mmu-mir-138-2,rno-mir-138-2,cpo-mir-138-2,ocu-mir-138-2,cgr-mir-138,hsa-mir-138-2,ppy-mir-138-2,mml-mir-138,bta-mir-138-2,ptr-mir-138,eca-mir-138-1,mdo-mir-138,efu-mir-138b,ggo-mir-138,pal-mir-138-2,dno-mir-138-2,nle-mir-138,oga-mir-138-2,mmr-mir-138-2,gga-mir-138-2,tni-mir-138,fru-mir-138,	mmu-mir-138-2	cAGCTGGTGTTGTGAATCAGGCCGacgagcagcgcatcctcttacccgGCTATTTCACGACACCAGGGTtg	mmu-miR-138-5p	AGCTGGTGTTGTGAATCAGGCCG	5'	Yes	gp1a	....((((.((.(((..(..(((((((((((((...(((((..(((.((......)))))...)))))..))))))))))))).)..))))).))))...........	93	56.5	-42.8	15.5	35	25.5	42.5	40.5	66	28.3159	33.9948	27.8157	35.3355	33.1244	50.1543	middle
107	189	mmu-miR-139-5p_R+1	TCTACAGTGCACGTGTCTCCAGT	23	chr7	+	101475364	101475471	ggacaggcgcaggtgtatTCTACAGTGCACGTGTCTCCAGTgtggctcggaggcTGGAGACGCGGCCCTGTTGGAGTaacaactgaagccagagtcttcgaagggtgg	21	mmu-mir-139,rno-mir-139,hsa-mir-139,ppy-mir-139,mml-mir-139,ssc-mir-139,ppa-mir-139,lla-mir-139,cpo-mir-139,cgr-mir-139,bta-mir-139,eca-mir-139,ptr-mir-139,cja-mir-139,cfa-mir-139,efu-mir-139,ggo-mir-139,pal-mir-139,dno-mir-139,ocu-mir-139,tch-mir-139,	mmu-mir-139	gtgtatTCTACAGTGCACGTGTCTCCAGtgtggctcggaggcTGGAGACGCGGCCCTGTTGGAGtaac	mmu-miR-139-5p	TCTACAGTGCACGTGTCTCCAG	5'	Diff	gp1a	((((.(((.(((.((((((((((((.((.((((((((((((...........)))))))))))))).)))).)))))).)).)))..)))...))))((....))...	97	59.3	-45.1	2203	2797	2767	5364	5793	6338	4024.51	2716.67	3018.27	4459.76	4738.01	4816.34	middle
107	190	mmu-miR-139-3p_R+1	TGGAGACGCGGCCCTGTTGGAGT	23	chr7	+	101475364	101475471	ggacaggcgcaggtgtatTCTACAGTGCACGTGTCTCCAGTgtggctcggaggcTGGAGACGCGGCCCTGTTGGAGTaacaactgaagccagagtcttcgaagggtgg	21	mmu-mir-139,rno-mir-139,hsa-mir-139,ppy-mir-139,mml-mir-139,ssc-mir-139,ppa-mir-139,lla-mir-139,cpo-mir-139,cgr-mir-139,bta-mir-139,eca-mir-139,ptr-mir-139,cja-mir-139,cfa-mir-139,efu-mir-139,ggo-mir-139,pal-mir-139,dno-mir-139,ocu-mir-139,tch-mir-139,	mmu-mir-139	gtgtatTCTACAGTGCACGTGTCTCCAGtgtggctcggaggcTGGAGACGCGGCCCTGTTGGAGtaac	mmu-miR-139-3p	TGGAGACGCGGCCCTGTTGGAG	3'	Diff	gp1a	((((.(((.(((.((((((((((((.((.((((((((((((...........)))))))))))))).)))).)))))).)).)))..)))...))))((....))...	97	59.3	-45.1	40	81	41	62	55	76	73.0733	78.6738	44.7232	51.5483	44.9837	57.7535	middle
108	191	mmu-miR-140-5p	CAGTGGTTTTACCCTATGGTAG	22	chr8	+	107551225	107551336	tgtgtgtctctctctgtgtcctgcCAGTGGTTTTACCCTATGGTAGgttacgtcatgctgttctACCACAGGGTAGAACCACGGACagggtactggagcaccctctgcatcg	39	mmu-mir-140,mdo-mir-140,ssc-mir-140,rno-mir-140,cpo-mir-140,dno-mir-140,ocu-mir-140,ppa-mir-140,nle-mir-140,oga-mir-140,mmr-mir-140,cgr-mir-140,hsa-mir-140,ptr-mir-140,ppy-mir-140,mml-mir-140,bta-mir-140,eca-mir-140,cja-mir-140,cfa-mir-140,pal-mir-140,efu-mir-140,ggo-mir-140,chi-mir-140,tch-mir-140,mne-mir-140,dma-mir-140,gga-mir-140,oni-mir-140,pol-mir-140,gmo-mir-140,cli-mir-140,tgu-mir-140,xtr…	mmu-mir-140	cctgcCAGTGGTTTTACCCTATGGTAGgttacgtcatgctgttcTACCACAGGGTAGAACCACGGacagg	mmu-miR-140-5p	CAGTGGTTTTACCCTATGGTAG	5'	Yes	gp1a	...(((.((((....((..((((((.(((((((((((((.(((((((..(((......)))))))))).))))))))))))))).))))..)).)))))))...........	98	53.6	-51	2120	3783	3510	3162	3256	4314	3872.88	3674.36	3828.74	2628.96	2663.04	3278.27	middle
108	192	mmu-miR-140-3p_L-1R+2	ACCACAGGGTAGAACCACGGAC	22	chr8	+	107551225	107551336	tgtgtgtctctctctgtgtcctgcCAGTGGTTTTACCCTATGGTAGgttacgtcatgctgttctACCACAGGGTAGAACCACGGACagggtactggagcaccctctgcatcg	39	mmu-mir-140,mdo-mir-140,ssc-mir-140,rno-mir-140,cpo-mir-140,dno-mir-140,ocu-mir-140,ppa-mir-140,nle-mir-140,oga-mir-140,mmr-mir-140,cgr-mir-140,hsa-mir-140,ptr-mir-140,ppy-mir-140,mml-mir-140,bta-mir-140,eca-mir-140,cja-mir-140,cfa-mir-140,pal-mir-140,efu-mir-140,ggo-mir-140,chi-mir-140,tch-mir-140,mne-mir-140,dma-mir-140,gga-mir-140,oni-mir-140,pol-mir-140,gmo-mir-140,cli-mir-140,tgu-mir-140,xtr…	mmu-mir-140	cctgcCAGTGGTTTTACCCTATGGTAGgttacgtcatgctgttcTACCACAGGGTAGAACCACGGacagg	mmu-miR-140-3p	TACCACAGGGTAGAACCACGG	3'	Diff	gp1a	...(((.((((....((..((((((.(((((((((((((.(((((((..(((......)))))))))).))))))))))))))).))))..)).)))))))...........	98	53.6	-51	43975	75710	85233	128870	91356	115023	80335	73535.7	92973	107146	74718.7	87407.6	high
109	193	mmu-miR-142a-5p_L+2R-1	CCCATAAAGTAGAAAGCACTAC	22	chr11	+	87756845	87756955	acagacagacagtgcagtcaCCCATAAAGTAGAAAGCACTACtaacagcactggagggTGTAGTGTTTCCTACTTTATGGatgagtgcactgtgggcttcggagaccacgc	29	mmu-mir-142a,eca-mir-142,rno-mir-142,hsa-mir-142,bta-mir-142,ppy-mir-142,mml-mir-142,aja-mir-142,cpo-mir-142,dno-mir-142,ocu-mir-142,cgr-mir-142,ptr-mir-142,mdo-mir-142,cja-mir-142,cfa-mir-142,pal-mir-142,efu-mir-142,ssc-mir-142,ggo-mir-142,tch-mir-142,gga-mir-142,dre-mir-142a,dre-mir-142b,cli-mir-142,tgu-mir-142,xtr-mir-142-1,xtr-mir-142-2,xla-mir-142,	mmu-mir-142a	accCATAAAGTAGAAAGCACTACTaacagcactggagggTGTAGTGTTTCCTACTTTATGGAtg	mmu-miR-142a-5p	CATAAAGTAGAAAGCACTACT	5'	Diff	gp1a	........((((((((.(((.(((((((((((.(((((((((...((....))......))))))))).))))))))))).))).)))))))).((((....)).))....	85	49.5	-48	7057.5	10444	8507	10666	9149	8309	12892.9	10144.1	9279.52	8867.97	7482.83	6314.13	high
109	194	mmu-miR-142a-3p_R-1	TGTAGTGTTTCCTACTTTATGG	22	chr11	+	87756845	87756955	acagacagacagtgcagtcaCCCATAAAGTAGAAAGCACTACtaacagcactggagggTGTAGTGTTTCCTACTTTATGGatgagtgcactgtgggcttcggagaccacgc	29	mmu-mir-142a,eca-mir-142,rno-mir-142,hsa-mir-142,bta-mir-142,ppy-mir-142,mml-mir-142,aja-mir-142,cpo-mir-142,dno-mir-142,ocu-mir-142,cgr-mir-142,ptr-mir-142,mdo-mir-142,cja-mir-142,cfa-mir-142,pal-mir-142,efu-mir-142,ssc-mir-142,ggo-mir-142,tch-mir-142,gga-mir-142,dre-mir-142a,dre-mir-142b,cli-mir-142,tgu-mir-142,xtr-mir-142-1,xtr-mir-142-2,xla-mir-142,	mmu-mir-142a	accCATAAAGTAGAAAGCACTACTaacagcactggagggTGTAGTGTTTCCTACTTTATGGAtg	mmu-miR-142a-3p	TGTAGTGTTTCCTACTTTATGGA	3'	Diff	gp1a	........((((((((.(((.(((((((((((.(((((((((...((....))......))))))))).))))))))))).))).)))))))).((((....)).))....	85	49.5	-48	993	1482	1581	1181	1716	1724	1814.04	1439.44	1724.57	981.912	1403.49	1310.09	middle
110	195	mmu-miR-143-5p	GGTGCAGTGCTGCATCTCTGG	21	chr18	-	61649174	61649278	gcggagcgcctgtctcccagcctgaGGTGCAGTGCTGCATCTCTGGtcagttgggagtcTGAGATGAAGCACTGTAGCTCAggaagggagaagatgtcctgcagc	36	mmu-mir-143,cja-mir-143,rno-mir-143,cpo-mir-143,cfa-mir-143,pal-mir-143,dno-mir-143,ocu-mir-143,nle-mir-143,oga-mir-143,cgr-mir-143,hsa-mir-143,ppy-mir-143,ggo-mir-143,lla-mir-143,bta-mir-143,eca-mir-143,ptr-mir-143,ppa-mir-143,mdo-mir-143,mml-mir-143,efu-mir-143,ssc-mir-143,chi-mir-143,oar-mir-143,tch-mir-143,dma-mir-143,sbo-mir-143,aja-mir-143,gga-mir-143,oni-mir-143,gmo-mir-143,aca-mir-143,cli…	mmu-mir-143	cctgaGGTGCAGTGCTGCATCTCTGGtcagttgggagtcTGAGATGAAGCACTGTAGCTCagg	mmu-miR-143-5p	GGTGCAGTGCTGCATCTCTGG	5'	Yes	gp1a	((((..(..((.((((((..((((((.(((((((((.((((((.((((......)).)).)))))).))))))))).))))))..))))))))..)..))))...	102	59	-59.6	2589	3006	3636	8679	8690	5934	4729.67	2919.67	3966.19	7215.93	7107.42	4509.33	high
110	196	mmu-miR-143-3p_R+1	TGAGATGAAGCACTGTAGCTCT	22	chr18	-	61649174	61649278	gcggagcgcctgtctcccagcctgaGGTGCAGTGCTGCATCTCTGGtcagttgggagtcTGAGATGAAGCACTGTAGCTCAggaagggagaagatgtcctgcagc	36	mmu-mir-143,cja-mir-143,rno-mir-143,cpo-mir-143,cfa-mir-143,pal-mir-143,dno-mir-143,ocu-mir-143,nle-mir-143,oga-mir-143,cgr-mir-143,hsa-mir-143,ppy-mir-143,ggo-mir-143,lla-mir-143,bta-mir-143,eca-mir-143,ptr-mir-143,ppa-mir-143,mdo-mir-143,mml-mir-143,efu-mir-143,ssc-mir-143,chi-mir-143,oar-mir-143,tch-mir-143,dma-mir-143,sbo-mir-143,aja-mir-143,gga-mir-143,oni-mir-143,gmo-mir-143,aca-mir-143,cli…	mmu-mir-143	cctgaGGTGCAGTGCTGCATCTCTGGtcagttgggagtcTGAGATGAAGCACTGTAGCTCagg	mmu-miR-143-3p	TGAGATGAAGCACTGTAGCTC	3'	Diff	gp1a	((((..(..((.((((((..((((((.(((((((((.((((((.((((......)).)).)))))).))))))))).))))))..))))))))..)..))))...	102	59	-59.6	191437	340951	189849	435578	300940	283137	349723	331159	207089	362150	246134	215160	high
111	197	mmu-miR-144-3p	TACAGTATAGATGATGTACT	20	chr11	+	78073001	78073080	ccttggctgggatatcatcatatactgtaagtttgtgatgagacacTACAGTATAGATGATGTACTagtctgggtacccc	22	mmu-mir-144,rno-mir-144,cpo-mir-144,cgr-mir-144,hsa-mir-144,eca-mir-144,ptr-mir-144,ppa-mir-144,ppy-mir-144,mml-mir-144,mne-mir-144,cja-mir-144,cfa-mir-144,ssc-mir-144,pal-mir-144,ocu-mir-144,aja-mir-144,oni-mir-144a,gmo-mir-144,xtr-mir-144,xla-mir-144,pol-mir-144,	mmu-mir-144	ggctgGGATATCATCATATACTGTAAGTttgtgatgagacacTACAGTATAGATGATGTACTagtc	mmu-miR-144-3p	TACAGTATAGATGATGTACT	3'	Yes	gp1a	((..((((((.((((((((.(((((((((.((((......))))..))))))))))))))))).))))))..))......	74	42.5	-32.3	5	0	5	0	0	0	9.13416	0	5.45405	0	0	0	low
112	198	mmu-miR-145a-5p	GTCCAGTTTTCCCAGGAATCCCT	23	chr18	-	61647811	61647903	caccttgtcctcacgGTCCAGTTTTCCCAGGAATCCCTtggatgctaagatggGGATTCCTGGAAATACTGTTCTtgaggtcatggcttagca	29	mmu-mir-145a,rno-mir-145,cpo-mir-145,hsa-mir-145,bta-mir-145,ptr-mir-145,ppy-mir-145,ggo-mir-145,chi-mir-145,aja-mir-145,eca-mir-145,mdo-mir-145,mml-mir-145,mne-mir-145,cja-mir-145,cfa-mir-145,efu-mir-145,ssc-mir-145,pal-mir-145,ocu-mir-145,ppa-mir-145,nle-mir-145,oga-mir-145,mmr-mir-145,dma-mir-145,oni-mir-145,aca-mir-145,ola-mir-145,xla-mir-145,	mmu-mir-145a	ctcacgGTCCAGTTTTCCCAGGAATCCCTtggatgctaagatggggATTCCTGGAAATACTGTTCTTGag	mmu-miR-145a-5p	GTCCAGTTTTCCCAGGAATCCCT	5'	Yes	gp1a	..((.((.(((((.((..((((.((.((((((((((((.............)))))))))))).)).))))..))))))).)).)).......	84	49.5	-40.6	11345	14022	19681	31438.5	28667.5	41494	20725.4	13619.3	21468.2	26138.7	23446.7	31531.9	high
112	199	mmu-miR-145a-3p_L+2R-2	GGATTCCTGGAAATACTGTTCT	22	chr18	-	61647811	61647903	caccttgtcctcacgGTCCAGTTTTCCCAGGAATCCCTtggatgctaagatggGGATTCCTGGAAATACTGTTCTtgaggtcatggcttagca	29	mmu-mir-145a,rno-mir-145,cpo-mir-145,hsa-mir-145,bta-mir-145,ptr-mir-145,ppy-mir-145,ggo-mir-145,chi-mir-145,aja-mir-145,eca-mir-145,mdo-mir-145,mml-mir-145,mne-mir-145,cja-mir-145,cfa-mir-145,efu-mir-145,ssc-mir-145,pal-mir-145,ocu-mir-145,ppa-mir-145,nle-mir-145,oga-mir-145,mmr-mir-145,dma-mir-145,oni-mir-145,aca-mir-145,ola-mir-145,xla-mir-145,	mmu-mir-145a	ctcacgGTCCAGTTTTCCCAGGAATCCCTtggatgctaagatggggATTCCTGGAAATACTGTTCTTGag	mmu-miR-145a-3p	ATTCCTGGAAATACTGTTCTTG	3'	Diff	gp1a	..((.((.(((((.((..((((.((.((((((((((((.............)))))))))))).)).))))..))))))).)).)).......	84	49.5	-40.6	1927	2153	1253	2530	3191	2449	3520.31	2091.17	1366.79	2103.5	2609.87	1861.03	middle
113	200	mmu-miR-145b_R-2_1ss18GA	GTCCAGTTTTCCCAGGAAA	19	chr18	-	69022199	69022273	ctccctgttgaagtcaGTCCAGTTTTCCCAGGAGActccagtctggcttgagaaattggtgttaaaaacagggaa	1	mmu-mir-145b,	mmu-mir-145b	ctccctgttgaagtcaGTCCAGTTTTCCCAGGAGACTccagtctggcttgagaaattggtgttaaaaacagggaa	mmu-miR-145b	GTCCAGTTTTCCCAGGAGACT	5'	Diff	gp1a	.((((((((.....((..((((((((..((((((((....))))..)))).)))))))))).....)))))))).	73	46.7	-26.5	0	0	0	6.5	2.5	0	0	0	0	5.40426	2.04471	0	low
114	201	mmu-miR-146b-5p_R+2	TGAGAACTGAATTCCATAGGCTGT	24	chr19	+	46342762	46342872	gactgagagaactttggccacctggctcTGAGAACTGAATTCCATAGGCTGTgagctctagcagacGCCCTAGGGACTCAGTTCTGGTgcccggctgtgctataccatcaa	21	mmu-mir-146b,rno-mir-146b,cgr-mir-146b,hsa-mir-146b,bta-mir-146b,eca-mir-146b,ptr-mir-146b,mdo-mir-146b,ppy-mir-146b,mml-mir-146b,cja-mir-146b,cfa-mir-146b,efu-mir-146,ssc-mir-146b,ggo-mir-146b,dno-mir-146b,chi-mir-146b,ppa-mir-146b,nle-mir-146b,mmr-mir-146b,sbo-mir-146b,	mmu-mir-146b	gactgagagaactttggccacctggctcTGAGAACTGAATTCCATAGGCTgtgagctctagcagacGCCCTAGGGACTCAGTTCTGGTgcccggctgtgctataccatc	mmu-miR-146b-5p	TGAGAACTGAATTCCATAGGCT	5'	Diff	gp1a	......((......((((((((.(((.((.((((((((.((((.((((..((..((....))..))..)))))))).)))))))))).))).)).)).)))).....))..	103	54.1	-40	2262	6157.5	3086.5	8610.5	5938	6240	4132.3	5980.66	3366.79	7158.98	4856.6	4741.86	high
114	202	mmu-miR-146b-3p	GCCCTAGGGACTCAGTTCTGGT	22	chr19	+	46342762	46342872	gactgagagaactttggccacctggctcTGAGAACTGAATTCCATAGGCTGTgagctctagcagacGCCCTAGGGACTCAGTTCTGGTgcccggctgtgctataccatcaa	21	mmu-mir-146b,rno-mir-146b,cgr-mir-146b,hsa-mir-146b,bta-mir-146b,eca-mir-146b,ptr-mir-146b,mdo-mir-146b,ppy-mir-146b,mml-mir-146b,cja-mir-146b,cfa-mir-146b,efu-mir-146,ssc-mir-146b,ggo-mir-146b,dno-mir-146b,chi-mir-146b,ppa-mir-146b,nle-mir-146b,mmr-mir-146b,sbo-mir-146b,	mmu-mir-146b	gactgagagaactttggccacctggctcTGAGAACTGAATTCCATAGGCTgtgagctctagcagacGCCCTAGGGACTCAGTTCTGGTgcccggctgtgctataccatc	mmu-miR-146b-3p	GCCCTAGGGACTCAGTTCTGGT	3'	Yes	gp1a	......((......((((((((.(((.((.((((((((.((((.((((..((..((....))..))..)))))))).)))))))))).))).)).)).)))).....))..	103	54.1	-40	17	29	37	108	46	57	31.0562	28.1672	40.36	89.7938	37.6227	43.3151	middle
115	203	mmu-miR-146a-5p	TGAGAACTGAATTCCATGGGTT	22	chr11	-	43374380	43374472	tgtgtatccccagctcTGAGAACTGAATTCCATGGGTTatatcaatgtcagACCTGTGAAATTCAGTTCTTCAgctgggatagctctgtcatc	13	mmu-mir-146a,rno-mir-146a,cpo-mir-146a,tch-mir-146a,cgr-mir-146a,hsa-mir-146a,ptr-mir-146a,ppy-mir-146a,mml-mir-146a,cja-mir-146a,pal-mir-146a,nle-mir-146a,dno-mir-146a,	mmu-mir-146a	agctcTGAGAACTGAATTCCATGGGTTatatcaatgtcagaCCTGTGAAATTCAGTTCTTCAGct	mmu-miR-146a-5p	TGAGAACTGAATTCCATGGGTT	5'	Yes	gp1a	.((.(((.(((((((..((((((((((((.((..((((............))))..)).)))))))))))).)))))))))))).........	83	44.1	-37.2	60343	87494.5	70074.5	176848	137942	100322	110237	84981.8	76438	147035	112821	76236.1	high
115	204	mmu-miR-146a-3p_L+1R-1	ACCTGTGAAATTCAGTTCTTCA	22	chr11	-	43374380	43374472	tgtgtatccccagctcTGAGAACTGAATTCCATGGGTTatatcaatgtcagACCTGTGAAATTCAGTTCTTCAgctgggatagctctgtcatc	13	mmu-mir-146a,rno-mir-146a,cpo-mir-146a,tch-mir-146a,cgr-mir-146a,hsa-mir-146a,ptr-mir-146a,ppy-mir-146a,mml-mir-146a,cja-mir-146a,pal-mir-146a,nle-mir-146a,dno-mir-146a,	mmu-mir-146a	agctcTGAGAACTGAATTCCATGGGTTatatcaatgtcagaCCTGTGAAATTCAGTTCTTCAGct	mmu-miR-146a-3p	CCTGTGAAATTCAGTTCTTCAG	3'	Diff	gp1a	.((.(((.(((((((..((((((((((((.((..((((............))))..)).)))))))))))).)))))))))))).........	83	44.1	-37.2	12	24	20	12	18	11	21.922	23.3107	21.8162	9.97709	14.7219	8.35906	middle
116	205	mmu-miR-147-5p_R-2	TGGAAACATTTCTGCACAAACT	22	chr2	+	122640799	122640882	actctatgaatctagTGGAAACATTTCTGCACAAACTagatgttgatgccAGTGTGCGGAAATGCTTCTGCTacatttgtaggg	12	mmu-mir-147,rno-mir-147,cgr-mir-147,hsa-mir-147b,ppy-mir-147b,bta-mir-147,ptr-mir-147b,cfa-mir-147,chi-mir-147,gga-mir-147,aca-mir-147,tgu-mir-147,	mmu-mir-147	tatgaatctagTGGAAACATTTCTGCACAAACTAGatgttgatgccaGTGTGCGGAAATGCTTCTGCTAcatttgtagg	mmu-miR-147-5p	TGGAAACATTTCTGCACAAACTAG	5'	Diff	gp1a	.(((((..(((.(((..(((.(((((((((((((((.....)))........)))))))))))).)))..))).)))..)))))	83	41.7	-34.8	10	15	12	38	6	17	18.2683	14.5692	13.0897	31.5941	4.90731	12.9185	middle
116	206	mmu-miR-147-3p_L+1R-1	AGTGTGCGGAAATGCTTCTGCT	22	chr2	+	122640799	122640882	actctatgaatctagTGGAAACATTTCTGCACAAACTagatgttgatgccAGTGTGCGGAAATGCTTCTGCTacatttgtaggg	12	mmu-mir-147,rno-mir-147,cgr-mir-147,hsa-mir-147b,ppy-mir-147b,bta-mir-147,ptr-mir-147b,cfa-mir-147,chi-mir-147,gga-mir-147,aca-mir-147,tgu-mir-147,	mmu-mir-147	tatgaatctagTGGAAACATTTCTGCACAAACTAGatgttgatgccaGTGTGCGGAAATGCTTCTGCTAcatttgtagg	mmu-miR-147-3p	GTGTGCGGAAATGCTTCTGCTA	3'	Diff	gp1a	.(((((..(((.(((..(((.(((((((((((((((.....)))........)))))))))))).)))..))).)))..)))))	83	41.7	-34.8	5	11	15	49	9	5	9.13416	10.6841	16.3622	40.7398	7.36097	3.79957	middle
117	207	mmu-miR-148b-5p_R-1	GAAGTTCTGTTATACACTCAGGC	23	chr15	+	103285125	103285227	caggcacccttagcatttgaggtGAAGTTCTGTTATACACTCAGGCtgtggctctgaaagTCAGTGCATCACAGAACTTTGTctcgaaagctttctagcagct	25	mmu-mir-148b,rno-mir-148b,cpo-mir-148b,cfa-mir-148b,pal-mir-148b,dno-mir-148b,ocu-mir-148b,tch-mir-148b,cgr-mir-148b,hsa-mir-148b,ppy-mir-148b,mml-mir-148b,bta-mir-148b,eca-mir-148b,ptr-mir-148b,cja-mir-148b,efu-mir-148,ssc-mir-148b,ggo-mir-148b,chi-mir-148b,ppa-mir-148b,nle-mir-148b,oga-mir-148b,mmr-mir-148b,dma-mir-148b,	mmu-mir-148b	caggcacccttagcatttgaggtGAAGTTCTGTTATACACTCAGGCTgtggctctgaaagTCAGTGCATCACAGAACTTTGTctcgaaagctttcta	mmu-miR-148b-5p	GAAGTTCTGTTATACACTCAGGCT	5'	Diff	gp1a	...((......(((.(((((((..(((((((((.((.(((((((((....)).))))......))).)).)))))))))..))))))).))).....))....	96	46.6	-36.8	56	91	52	97	71	56	102.303	88.3866	56.7221	80.6482	58.0699	42.5552	middle
117	208	mmu-miR-148b-3p	TCAGTGCATCACAGAACTTTGT	22	chr15	+	103285125	103285227	caggcacccttagcatttgaggtGAAGTTCTGTTATACACTCAGGCtgtggctctgaaagTCAGTGCATCACAGAACTTTGTctcgaaagctttctagcagct	25	mmu-mir-148b,rno-mir-148b,cpo-mir-148b,cfa-mir-148b,pal-mir-148b,dno-mir-148b,ocu-mir-148b,tch-mir-148b,cgr-mir-148b,hsa-mir-148b,ppy-mir-148b,mml-mir-148b,bta-mir-148b,eca-mir-148b,ptr-mir-148b,cja-mir-148b,efu-mir-148,ssc-mir-148b,ggo-mir-148b,chi-mir-148b,ppa-mir-148b,nle-mir-148b,oga-mir-148b,mmr-mir-148b,dma-mir-148b,	mmu-mir-148b	caggcacccttagcatttgaggtGAAGTTCTGTTATACACTCAGGCTgtggctctgaaagTCAGTGCATCACAGAACTTTGTctcgaaagctttcta	mmu-miR-148b-3p	TCAGTGCATCACAGAACTTTGT	3'	Yes	gp1a	...((......(((.(((((((..(((((((((.((.(((((((((....)).))))......))).)).)))))))))..))))))).))).....))....	96	46.6	-36.8	4114	6159	4407	8202	8968.5	7057	7515.59	5982.12	4807.2	6819.34	7335.21	5362.71	high
118	209	mmu-miR-148a-5p	AAAGTTCTGAGACACTCCGACT	22	chr6	-	51269810	51269919	gaggaagacagccagtttggtcttttgagacAAAGTTCTGAGACACTCCGACTctgagtatgatagaagTCAGTGCACTACAGAACTTTGTctctagaggctgtggtcgc	27	mmu-mir-148a,rno-mir-148a,cpo-mir-148a,dno-mir-148a,tch-mir-148a,sbo-mir-148a,cgr-mir-148a,hsa-mir-148a,ppy-mir-148a,mml-mir-148a,bta-mir-148a,eca-mir-148a,ssc-mir-148a,oar-mir-148a,ptr-mir-148a,mdo-mir-148,cja-mir-148a,cfa-mir-148a,pal-mir-148a,ggo-mir-148a,ocu-mir-148a,chi-mir-148a,ppa-mir-148a,nle-mir-148a,oga-mir-148a,gga-mir-148a,xla-mir-148a,	mmu-mir-148a	agccagtttggtcttttgagacAAAGTTCTGAGACACTCCGACTctgagtatgatagaagTCAGTGCACTACAGAACTTTGTctctagaggctgtggtc	mmu-miR-148a-5p	AAAGTTCTGAGACACTCCGACT	5'	Yes	gp1a	..........((((....(((((((.((((((((((((((((.((((..(((((((.......))).))))))))..)).)))))))))))))).))))))).))))...	97	47.3	-41.2	100	124	145	135	223	145	182.683	120.439	158.167	112.242	182.388	110.188	middle
118	210	mmu-miR-148a-3p	TCAGTGCACTACAGAACTTTGT	22	chr6	-	51269810	51269919	gaggaagacagccagtttggtcttttgagacAAAGTTCTGAGACACTCCGACTctgagtatgatagaagTCAGTGCACTACAGAACTTTGTctctagaggctgtggtcgc	27	mmu-mir-148a,rno-mir-148a,cpo-mir-148a,dno-mir-148a,tch-mir-148a,sbo-mir-148a,cgr-mir-148a,hsa-mir-148a,ppy-mir-148a,mml-mir-148a,bta-mir-148a,eca-mir-148a,ssc-mir-148a,oar-mir-148a,ptr-mir-148a,mdo-mir-148,cja-mir-148a,cfa-mir-148a,pal-mir-148a,ggo-mir-148a,ocu-mir-148a,chi-mir-148a,ppa-mir-148a,nle-mir-148a,oga-mir-148a,gga-mir-148a,xla-mir-148a,	mmu-mir-148a	agccagtttggtcttttgagacAAAGTTCTGAGACACTCCGACTctgagtatgatagaagTCAGTGCACTACAGAACTTTGTctctagaggctgtggtc	mmu-miR-148a-3p	TCAGTGCACTACAGAACTTTGT	3'	Yes	gp1a	..........((((....(((((((.((((((((((((((((.((((..(((((((.......))).))))))))..)).)))))))))))))).))))))).))))...	97	47.3	-41.2	27597	46085	28959	42409	39479.5	38352	50415.1	44761.5	31588.8	35259.9	32289.7	29144.2	high
119	211	mmu-miR-149-5p	TCTGGCTCCGTGTCTTCACTCCC	23	chr1	+	92850371	92850455	gtgcccaggcTCTGGCTCCGTGTCTTCACTCCCgtgtttgtccgaggaggGAGGGAGGGACGGGGGCGGTGCtggggcaactgga	16	mmu-mir-149,rno-mir-149,cpo-mir-149,cgr-mir-149,hsa-mir-149,eca-mir-149,ptr-mir-149,ppy-mir-149,mml-mir-149,cfa-mir-149,efu-mir-149,ssc-mir-149,dno-mir-149,nle-mir-149-1,nle-mir-149-2,oga-mir-149,	mmu-mir-149	ggcTCTGGCTCCGTGTCTTCACTCCCgtgtttgtccgaggaggGAGGGAGGGACGGGGGCGGTGCt	mmu-miR-149-5p	TCTGGCTCCGTGTCTTCACTCCC	5'	Yes	gp1a	.(((((..((.(((.((((((..((((.(((((...(((....)))..)))))))))..)))))).))).))..)))))......	78	68.2	-45.2	1355	1307	2441	3117	3513	4165	2475.36	1269.46	2662.67	2591.55	2873.23	3165.04	middle
119	212	mmu-miR-149-3p	GAGGGAGGGACGGGGGCGGTGC	22	chr1	+	92850371	92850455	gtgcccaggcTCTGGCTCCGTGTCTTCACTCCCgtgtttgtccgaggaggGAGGGAGGGACGGGGGCGGTGCtggggcaactgga	16	mmu-mir-149,rno-mir-149,cpo-mir-149,cgr-mir-149,hsa-mir-149,eca-mir-149,ptr-mir-149,ppy-mir-149,mml-mir-149,cfa-mir-149,efu-mir-149,ssc-mir-149,dno-mir-149,nle-mir-149-1,nle-mir-149-2,oga-mir-149,	mmu-mir-149	ggcTCTGGCTCCGTGTCTTCACTCCCgtgtttgtccgaggaggGAGGGAGGGACGGGGGCGGTGCt	mmu-miR-149-3p	GAGGGAGGGACGGGGGCGGTGC	3'	Yes	gp1a	.(((((..((.(((.((((((..((((.(((((...(((....)))..)))))))))..)))))).))).))..)))))......	78	68.2	-45.2	12	17	52	11	14	26	21.922	16.5118	56.7221	9.14567	11.4504	19.7578	middle
120	213	mmu-miR-150-5p	TCTCCCAACCCTTGTACCAGTG	22	chr7	+	45121747	45121828	cttctcaatgccctgTCTCCCAACCCTTGTACCAGTGctgtgcctcagaccctggtacaggcctgggggatagggacttggg	12	mmu-mir-150,rno-mir-150,cpo-mir-150,cgr-mir-150,hsa-mir-150,ppy-mir-150,mml-mir-150,eca-mir-150,ptr-mir-150,cja-mir-150,cfa-mir-150,dno-mir-150,	mmu-mir-150	ccctgTCTCCCAACCCTTGTACCAGTGctgtgcctcagaccCTGGTACAGGCCTGGGGGATAGgg	mmu-miR-150-5p	TCTCCCAACCCTTGTACCAGTG	5'	Yes	gp1a	...(((((..((((((((((((..(((.(((((((..(((.....)))...))))))))))..))))))))))))..)))))	79	59.8	-45.2	14	15	31	16	29	16	25.5757	14.5692	33.8151	13.3028	23.7187	12.1586	middle
121	214	mmu-miR-151-5p	TCGAGGAGCTCACAGTCTAGT	21	chr15	-	73254796	73254890	agcgctttcctgcccTCGAGGAGCTCACAGTCTAGTatgtctcctccctaCTAGACTGAGGCTCCTTGAGGacagggatcgtcatactcacctcc	23	mmu-mir-151,rno-mir-151,cpo-mir-151,cgr-mir-151,hsa-mir-151a,mml-mir-151,bta-mir-151,eca-mir-151,ptr-mir-151,ppy-mir-151a,cfa-mir-151,efu-mir-151,ssc-mir-151,pal-mir-151,dno-mir-151,ocu-mir-151,chi-mir-151,ppa-mir-151,nle-mir-151,oga-mir-151,mmr-mir-151,dma-mir-151,sbo-mir-151,	mmu-mir-151	cctgcccTCGAGGAGCTCACAGTCTAGTatgtctcctccctaCTAGACTGAGGCTCCTTGAGGacagg	mmu-miR-151-5p	TCGAGGAGCTCACAGTCTAGT	5'	Yes	gp1a	.(((..((((((.((((((((((((..((((((((((...........)))))))))).)))))))))))).)))))).))).............	81	55.8	-47.4	10223	19376.5	11553.5	31100.8	20954.7	20155.2	18675.7	18820	12602.7	25858	17138.5	15316.2	high
121	215	mmu-miR-151-3p	CTAGACTGAGGCTCCTTGAGG	21	chr15	-	73254796	73254890	agcgctttcctgcccTCGAGGAGCTCACAGTCTAGTatgtctcctccctaCTAGACTGAGGCTCCTTGAGGacagggatcgtcatactcacctcc	23	mmu-mir-151,rno-mir-151,cpo-mir-151,cgr-mir-151,hsa-mir-151a,mml-mir-151,bta-mir-151,eca-mir-151,ptr-mir-151,ppy-mir-151a,cfa-mir-151,efu-mir-151,ssc-mir-151,pal-mir-151,dno-mir-151,ocu-mir-151,chi-mir-151,ppa-mir-151,nle-mir-151,oga-mir-151,mmr-mir-151,dma-mir-151,sbo-mir-151,	mmu-mir-151	cctgcccTCGAGGAGCTCACAGTCTAGTatgtctcctccctaCTAGACTGAGGCTCCTTGAGGacagg	mmu-miR-151-3p	CTAGACTGAGGCTCCTTGAGG	3'	Yes	gp1a	.(((..((((((.((((((((((((..((((((((((...........)))))))))).)))))))))))).)))))).))).............	81	55.8	-47.4	9644	22568	24243	33942	18165	21374	17618	21919.9	26444.5	28220.2	14856.9	16242.4	high
122	216	mmu-miR-152-5p	TAGGTTCTGTGATACACTCCGACT	24	chr11	+	96850370	96850479	aggaggctcgtcgccgctgttccccgggccTAGGTTCTGTGATACACTCCGACTcgggctctggagcagTCAGTGCATGACAGAACTTGGgcccggtaggaccttctgca	22	mmu-mir-152,rno-mir-152,cpo-mir-152,cgr-mir-152,hsa-mir-152,mml-mir-152,bta-mir-152,ptr-mir-152,mdo-mir-152,ppy-mir-152,cja-mir-152,cfa-mir-152,ocu-mir-152,efu-mir-152,ssc-mir-152,ggo-mir-152,pal-mir-152,tch-mir-152,ppa-mir-152,nle-mir-152,oga-mir-152,mmr-mir-152,	mmu-mir-152	ccgggccTAGGTTCTGTGATACACTCCGACTcgggctctggagcagTCAGTGCATGACAGAACTTGGgcccgg	mmu-miR-152-5p	TAGGTTCTGTGATACACTCCGACT	5'	Yes	gp1a	(((.(((.....))).....((((((((((((((((((((.((.((((..((((...(((....))))))))))).)).)))))))))))))))))..))))))......	81	61.8	-52.6	145	214	156	301	292	304	264.891	207.854	170.166	250.259	238.823	231.014	middle
122	217	mmu-miR-152-3p	TCAGTGCATGACAGAACTTGG	21	chr11	+	96850370	96850479	aggaggctcgtcgccgctgttccccgggccTAGGTTCTGTGATACACTCCGACTcgggctctggagcagTCAGTGCATGACAGAACTTGGgcccggtaggaccttctgca	22	mmu-mir-152,rno-mir-152,cpo-mir-152,cgr-mir-152,hsa-mir-152,mml-mir-152,bta-mir-152,ptr-mir-152,mdo-mir-152,ppy-mir-152,cja-mir-152,cfa-mir-152,ocu-mir-152,efu-mir-152,ssc-mir-152,ggo-mir-152,pal-mir-152,tch-mir-152,ppa-mir-152,nle-mir-152,oga-mir-152,mmr-mir-152,	mmu-mir-152	ccgggccTAGGTTCTGTGATACACTCCGACTcgggctctggagcagTCAGTGCATGACAGAACTTGGgcccgg	mmu-miR-152-3p	TCAGTGCATGACAGAACTTGG	3'	Yes	gp1a	(((.(((.....))).....((((((((((((((((((((.((.((((..((((...(((....))))))))))).)).)))))))))))))))))..))))))......	81	61.8	-52.6	32357	76174	36908	74293	62986	57602	59110.8	73986.4	40259.6	61769	51515.3	43772.6	high
123	218	mmu-miR-153-3p	TTGCATAGTCACAAAAGTGATC	22	chr12	+	117250795	117250900	ttgccagctacttagcggtggccggtgtcatttttgtgacgttgcagctagtaatatgagcccagTTGCATAGTCACAAAAGTGATCattggaaactgtgactgca	33	mmu-mir-153,rno-mir-153,hsa-mir-153-2,bta-mir-153-2,ppy-mir-153-2,mml-mir-153-2,ssc-mir-153,ggo-mir-153,mne-mir-153-2,cpo-mir-153,pal-mir-153-1,dno-mir-153b,ocu-mir-153,nle-mir-153-2,eca-mir-153-1,eca-mir-153-2,ptr-mir-153,mdo-mir-153-2,cja-mir-153-1,cfa-mir-153,efu-mir-153-1,pal-mir-153-2,nle-mir-153-1,gga-mir-153,oni-mir-153a-1,oni-mir-153a-2,dre-mir-153a,aca-mir-153-1,cli-mir-153b,tgu-mir-153-…	mmu-mir-153	cggtGTCATTTTTGTGACGTTGCAGCTagtaatatgagcccagTTGCATAGTCACAAAAGTGATCattg	mmu-miR-153-3p	TTGCATAGTCACAAAAGTGATC	3'	Yes	gp1a	......((......(((((..((..(((((((((((((((..(((((((.((.......))..)))))))..))))))))))))).))..))..)))))....)).	99	46.2	-42.4	0	0	5	0	0	0	0	0	5.45405	0	0	0	low
124	219	mmu-miR-154-5p	TAGGTTATCCGTGTTGCCTTCG	22	chr12	+	109738424	109738507	gcggtgcttgaagaTAGGTTATCCGTGTTGCCTTCGctttattcgtgacgAATCATACACGGTTGACCTATTtttcagtaccaa	13	mmu-mir-154,rno-mir-154,cgr-mir-154,hsa-mir-154,ptr-mir-154,ppy-mir-154,ggo-mir-154,ppa-mir-154,eca-mir-154a,mml-mir-154,mne-mir-154,cja-mir-154,dno-mir-154a,	mmu-mir-154	gaagaTAGGTTATCCGTGTTGCCTTCGctttattcgtgacgAATCATACACGGTTGACCTATTttt	mmu-miR-154-5p	TAGGTTATCCGTGTTGCCTTCG	5'	Yes	gp1a	..((((((..(((((((((((.((((((....((((.((.......))))))....)))))).)))))))))))..))))))..	80	44	-35.4	42	126	142	86	411	321	76.727	122.381	154.895	71.5025	336.151	243.932	middle
124	220	mmu-miR-154-3p	AATCATACACGGTTGACCTATT	22	chr12	+	109738424	109738507	gcggtgcttgaagaTAGGTTATCCGTGTTGCCTTCGctttattcgtgacgAATCATACACGGTTGACCTATTtttcagtaccaa	13	mmu-mir-154,rno-mir-154,cgr-mir-154,hsa-mir-154,ptr-mir-154,ppy-mir-154,ggo-mir-154,ppa-mir-154,eca-mir-154a,mml-mir-154,mne-mir-154,cja-mir-154,dno-mir-154a,	mmu-mir-154	gaagaTAGGTTATCCGTGTTGCCTTCGctttattcgtgacgAATCATACACGGTTGACCTATTttt	mmu-miR-154-3p	AATCATACACGGTTGACCTATT	3'	Yes	gp1a	..((((((..(((((((((((.((((((....((((.((.......))))))....)))))).)))))))))))..))))))..	80	44	-35.4	55	138	47	61	93	132	100.476	134.037	51.2681	50.7169	76.0633	100.309	middle
125	221	mmu-miR-155-5p	TTAATGCTAATTGTGATAGGGGT	23	chr16	+	84714136	84714205	tatgctgTTAATGCTAATTGTGATAGGGGTtttggcctctgactgactcctacctgttagcattaacagg	3	mmu-mir-155,rno-mir-155,ssc-mir-155,	mmu-mir-155	ctgTTAATGCTAATTGTGATAGGGGTtttggcctctgactgaCTCCTACCTGTTAGCATTAACag	mmu-miR-155-5p	TTAATGCTAATTGTGATAGGGGT	5'	Yes	gp1a	....((((((((((((((.....((((((((.............))))))))...)))))))))))))).	65	42.9	-27	804	836	612	2527	1922	2332	1468.77	811.991	667.576	2101.01	1571.98	1772.12	middle
126	222	mmu-miR-181c-5p	AACATTCAACCTGTCGGTGAGT	22	chr8	-	84178863	84178968	agaacttgccaagggtttgggggAACATTCAACCTGTCGGTGAGTttgggcagctcagacaaACCATCGACCGTTGAGTGGACCccgaggcctggaactgccaccc	24	mmu-mir-181c,rno-mir-181c,cpo-mir-181c,cgr-mir-181c,hsa-mir-181c,ptr-mir-181c,ggo-mir-181c,ppa-mir-181c,bta-mir-181c,mdo-mir-181a-3,ppy-mir-181c,mml-mir-181c,cja-mir-181c,cfa-mir-181c,dno-mir-181c,nle-mir-181c,oga-mir-181c,dma-mir-181c,efu-mir-181c,ssc-mir-181c,pal-mir-181c,ocu-mir-181c,chi-mir-181c,tch-mir-181c,	mmu-mir-181c	gccaagggtttgggggAACATTCAACCTGTCGGTGAGTttgggcagctcagacaaACCATCGACCGTTGAGTGGACCccgaggcctgga	mmu-miR-181c-5p	AACATTCAACCTGTCGGTGAGT	5'	Yes	gp1a	........((..(((..(.((((..((((((((..(((((((.(((((...........)))))))))))).))))))))..)))).)..)))))...........	87	57.5	-43.5	35	137	105	125	192	187	63.9391	133.066	114.535	103.928	157.034	142.104	middle
126	223	mmu-miR-181c-3p	ACCATCGACCGTTGAGTGGACC	22	chr8	-	84178863	84178968	agaacttgccaagggtttgggggAACATTCAACCTGTCGGTGAGTttgggcagctcagacaaACCATCGACCGTTGAGTGGACCccgaggcctggaactgccaccc	24	mmu-mir-181c,rno-mir-181c,cpo-mir-181c,cgr-mir-181c,hsa-mir-181c,ptr-mir-181c,ggo-mir-181c,ppa-mir-181c,bta-mir-181c,mdo-mir-181a-3,ppy-mir-181c,mml-mir-181c,cja-mir-181c,cfa-mir-181c,dno-mir-181c,nle-mir-181c,oga-mir-181c,dma-mir-181c,efu-mir-181c,ssc-mir-181c,pal-mir-181c,ocu-mir-181c,chi-mir-181c,tch-mir-181c,	mmu-mir-181c	gccaagggtttgggggAACATTCAACCTGTCGGTGAGTttgggcagctcagacaaACCATCGACCGTTGAGTGGACCccgaggcctgga	mmu-miR-181c-3p	ACCATCGACCGTTGAGTGGACC	3'	Yes	gp1a	........((..(((..(.((((..((((((((..(((((((.(((((...........)))))))))))).))))))))..)))).)..)))))...........	87	57.5	-43.5	24	20	31	23	50	20	43.844	19.4256	33.8151	19.1228	40.8943	15.1983	middle
127	224	mmu-miR-181a-5p	AACATTCAACGCTGTCGGTGAGT	23	chr2	+	38852703	38852818	agatgggcaaccaagccagccttaagaggactccatggAACATTCAACGCTGTCGGTGAGTttgggattcaaaaacaaaaaaACCACCGACCGTTGACTGTACCttgggattctta	4	mmu-mir-181a-2,rno-mir-181a-2,cja-mir-181a-2,oni-mir-181c-3,	mmu-mir-181a-2	ccatggAACATTCAACGCTGTCGGTGAGTttgggattcaaaaacaaaaaaACCACCGACCGTTGACTGTACCttgg	mmu-miR-181a-5p	AACATTCAACGCTGTCGGTGAGT	5'	Yes	gp1a	...(((....)))............(((((..(((.((.(((.((((((..(((((((.((((.................))))))))))))))))).))).)).)))..))))).	90	46.6	-41.3	18875.5	25397	40087.5	42506	49720	48297	34482.4	24667.6	43727.9	35340.5	40665.3	36701.6	high
127	225	mmu-miR-181a-2-3p	ACCACCGACCGTTGACTGTACC	22	chr2	+	38852703	38852818	agatgggcaaccaagccagccttaagaggactccatggAACATTCAACGCTGTCGGTGAGTttgggattcaaaaacaaaaaaACCACCGACCGTTGACTGTACCttgggattctta	4	mmu-mir-181a-2,rno-mir-181a-2,cja-mir-181a-2,oni-mir-181c-3,	mmu-mir-181a-2	ccatggAACATTCAACGCTGTCGGTGAGTttgggattcaaaaacaaaaaaACCACCGACCGTTGACTGTACCttgg	mmu-miR-181a-2-3p	ACCACCGACCGTTGACTGTACC	3'	Yes	gp1a	...(((....)))............(((((..(((.((.(((.((((((..(((((((.((((.................))))))))))))))))).))).)).)))..))))).	90	46.6	-41.3	53	56	77	149	144	135.5	96.8221	54.3917	83.9924	123.882	117.776	102.968	middle
128	226	mmu-miR-181a-5p	AACATTCAACGCTGTCGGTGAGT	23	chr1	+	137966454	137966554	aggttgcttcagtgAACATTCAACGCTGTCGGTGAGTttggaattcaaataaaaACCATCGACCGTTGATTGTACCctatagctaaccatcatctactcca	49	mmu-mir-181a-1,rno-mir-181a-1,cpo-mir-181a-1,cfa-mir-181a-1,dno-mir-181a-1,ocu-mir-181a-1,nle-mir-181a-1,oga-mir-181a-1,dma-mir-181a-1,sbo-mir-181a-1,cpo-mir-181a-2,cgr-mir-181a,hsa-mir-181a-1,ptr-mir-181a-1,ppy-mir-181a-1,mml-mir-181a-1,ppa-mir-181a-1,mne-mir-181a-1,lla-mir-181a-1,bta-mir-181a-1,eca-mir-181a-2,mdo-mir-181a-1,cja-mir-181a-1,cfa-mir-181a-2,pal-mir-181a-2,ocu-mir-181a-2,tch-mir-181…	mmu-mir-181a-1	ggttgcttcagtgAACATTCAACGCTGTCGGTGAGTttggaattcaaataaaaACCATCGACCGTTGATTGTACCctatagctaacc	mmu-miR-181a-5p	AACATTCAACGCTGTCGGTGAGT	5'	Yes	gp1a	.(((((((..((...(((.((((((..(((((((.((((.............))))))))))))))))).)))...))..))).)))).............	87	41.6	-29.8	18875.5	25397	40087.5	42506	49720	48297	34482.4	24667.6	43727.9	35340.5	40665.3	36701.6	high
128	227	mmu-miR-181a-1-3p	ACCATCGACCGTTGATTGTACC	22	chr1	+	137966454	137966554	aggttgcttcagtgAACATTCAACGCTGTCGGTGAGTttggaattcaaataaaaACCATCGACCGTTGATTGTACCctatagctaaccatcatctactcca	49	mmu-mir-181a-1,rno-mir-181a-1,cpo-mir-181a-1,cfa-mir-181a-1,dno-mir-181a-1,ocu-mir-181a-1,nle-mir-181a-1,oga-mir-181a-1,dma-mir-181a-1,sbo-mir-181a-1,cpo-mir-181a-2,cgr-mir-181a,hsa-mir-181a-1,ptr-mir-181a-1,ppy-mir-181a-1,mml-mir-181a-1,ppa-mir-181a-1,mne-mir-181a-1,lla-mir-181a-1,bta-mir-181a-1,eca-mir-181a-2,mdo-mir-181a-1,cja-mir-181a-1,cfa-mir-181a-2,pal-mir-181a-2,ocu-mir-181a-2,tch-mir-181…	mmu-mir-181a-1	ggttgcttcagtgAACATTCAACGCTGTCGGTGAGTttggaattcaaataaaaACCATCGACCGTTGATTGTACCctatagctaacc	mmu-miR-181a-1-3p	ACCATCGACCGTTGATTGTACC	3'	Yes	gp1a	.(((((((..((...(((.((((((..(((((((.((((.............))))))))))))))))).)))...))..))).)))).............	87	41.6	-29.8	388	411	273	420	426	390.5	708.811	399.197	297.791	349.198	348.419	296.746	middle
129	228	mmu-miR-181b-5p_R-1	AACATTCATTGCTGTCGGTGGGT	23	chr1	+	137966621	137966724	cagagactatgtttacaaaggtcacaatcAACATTCATTGCTGTCGGTGGGTtgaactgtgtagaaaagCTCACTGAACAATGAATGCAActgtggccccgctt	32	mmu-mir-181b-1,rno-mir-181b-1,cpo-mir-181b-1,cgr-mir-181b,hsa-mir-181b-1,ggo-mir-181b,ppa-mir-181b,lla-mir-181b,ptr-mir-181b-1,mdo-mir-181b-1,ppy-mir-181b,mml-mir-181b-1,mne-mir-181b,cja-mir-181b-1,cfa-mir-181b-1,dma-mir-181b-1,efu-mir-181b,ssc-mir-181b-1,pal-mir-181b-1,dno-mir-181b-1,ocu-mir-181b-1,tch-mir-181b,nle-mir-181b-1,oga-mir-181b-1,gga-mir-181b-1,dre-mir-181b-3,aca-mir-181b-2,cli-mir-18…	mmu-mir-181b-1	aggtcacaatcAACATTCATTGCTGTCGGTGGGTTgaactgtgtagaaaagCTCACTGAACAATGAATGCAActgtggcc	mmu-miR-181b-5p	AACATTCATTGCTGTCGGTGGGTT	5'	Diff	gp1a	...................(((((((.....(((((((((...((((((((((...((....))...)))))))))).)))))))))....)))))))......	79	44.2	-32.4	2518.17	3497.33	4182	4997	4891.33	5979	4600.27	3396.89	4561.77	4154.63	4000.55	4543.53	middle
129	229	mmu-miR-181b-1-3p_1ss21AT	CTCACTGAACAATGAATGCAT	21	chr1	+	137966621	137966724	cagagactatgtttacaaaggtcacaatcAACATTCATTGCTGTCGGTGGGTtgaactgtgtagaaaagCTCACTGAACAATGAATGCAActgtggccccgctt	32	mmu-mir-181b-1,rno-mir-181b-1,cpo-mir-181b-1,cgr-mir-181b,hsa-mir-181b-1,ggo-mir-181b,ppa-mir-181b,lla-mir-181b,ptr-mir-181b-1,mdo-mir-181b-1,ppy-mir-181b,mml-mir-181b-1,mne-mir-181b,cja-mir-181b-1,cfa-mir-181b-1,dma-mir-181b-1,efu-mir-181b,ssc-mir-181b-1,pal-mir-181b-1,dno-mir-181b-1,ocu-mir-181b-1,tch-mir-181b,nle-mir-181b-1,oga-mir-181b-1,gga-mir-181b-1,dre-mir-181b-3,aca-mir-181b-2,cli-mir-18…	mmu-mir-181b-1	aggtcacaatcAACATTCATTGCTGTCGGTGGGTTgaactgtgtagaaaagCTCACTGAACAATGAATGCAActgtggcc	mmu-miR-181b-1-3p	CTCACTGAACAATGAATGCAA	3'	Diff	gp1a	...................(((((((.....(((((((((...((((((((((...((....))...)))))))))).)))))))))....)))))))......	79	44.2	-32.4	17	23	22	33	23	17	31.0562	22.3395	23.9978	27.437	18.8114	12.9185	middle
130	230	mmu-miR-181d-5p	AACATTCATTGTTGTCGGTGGGT	23	chr8	-	84178706	84178815	tcccctgcctcaggccacagcaaaggtcacaattAACATTCATTGTTGTCGGTGGGTtgtgaggaggcagccagacccaccgggggatgaatgtcactgtggctgggcca	13	mmu-mir-181d,rno-mir-181d,cgr-mir-181d,bta-mir-181d,cfa-mir-181d,efu-mir-181d,ssc-mir-181d,ggo-mir-181d,pal-mir-181d,dno-mir-181d,tch-mir-181d,ppa-mir-181d,oga-mir-181d,	mmu-mir-181d	acaattAACATTCATTGTTGTCGGTGGGTtgtgaggaggcagccagaCCCACCGGGGGATGAATGTCActgt	mmu-miR-181d-5p	AACATTCATTGTTGTCGGTGGGT	5'	Yes	gp1a	............((((.((((......((((....(((((((((....((((((((((....((......)).))))))))))..)))))))))...)))))))))))).	97	57.3	-42.3	214.667	526.333	303	556	660.333	667	392.16	511.218	330.515	462.272	540.077	506.863	middle
131	231	mmu-miR-181b-5p_R-1	AACATTCATTGCTGTCGGTGGGT	23	chr2	+	38853830	38853918	ttgatggctgcactcAACATTCATTGCTGTCGGTGGGTttgaatgtcaaccaactcactgatcaatgaatgcaaactgcgggccaaaaa	24	mmu-mir-181b-2,rno-mir-181b-2,cpo-mir-181b-2,hsa-mir-181b-2,eca-mir-181b,bta-mir-181b-2,ptr-mir-181b-2,mdo-mir-181b-2,ppy-mir-181b-2,mml-mir-181b-2,cja-mir-181b-2,cfa-mir-181b-2,dma-mir-181b-2,efu-mir-181e,ssc-mir-181b-2,pal-mir-181b-2,dno-mir-181b-2,ocu-mir-181b-2,chi-mir-181b,nle-mir-181b-2,oga-mir-181e,gga-mir-181b-2,oni-mir-181d,tgu-mir-181b-2,	mmu-mir-181b-2	ttgatggctgcactcAACATTCATTGCTGTCGGTGGGTTtgaatgtcaaccaaCTCACTGATCAATGAATGCAAActgcgggccaaaaa	mmu-miR-181b-5p	AACATTCATTGCTGTCGGTGGGTT	5'	Diff	gp1a	....((((((((.....(((((((((..(((((((((((((.....))...)))))))))))))))))))).....))))).)))....	81	44.9	-33.2	2518.17	3497.33	4182	4997	4891.33	5979	4600.27	3396.89	4561.77	4154.63	4000.55	4543.53	middle
132	232	mmu-miR-182-5p_R-1	TTTGGCAATGGTAGAACTCACACC	24	chr6	-	30165897	30166015	ggtctggctgctggaggcctcccaccattTTTGGCAATGGTAGAACTCACACCggtaaggtaatgggacccggTGGTTCTAGACTTGCCAACTAtggtgtaagtgctgagctgctgaag	7	mmu-mir-182,rno-mir-182,cgr-mir-182,eca-mir-182,cfa-mir-182,efu-mir-182,ssc-mir-182,	mmu-mir-182	accattTTTGGCAATGGTAGAACTCACACCGgtaaggtaatgggacccgGTGGTTCTAGACTTGCCAACTatggt	mmu-miR-182-5p	TTTGGCAATGGTAGAACTCACACCG	5'	Diff	gp1a	..((.(((.(((...(((((..((((((..(((((((...((((((...((((((..............))))))))))))...)))))))..))))))..)).))).))).)))))..	115	53.8	-45.1	315	135	202	274	299	483	575.452	131.123	220.344	227.81	244.548	367.039	middle
132	233	mmu-miR-182-3p_L-1R+1	TGGTTCTAGACTTGCCAACTA	21	chr6	-	30165897	30166015	ggtctggctgctggaggcctcccaccattTTTGGCAATGGTAGAACTCACACCggtaaggtaatgggacccggTGGTTCTAGACTTGCCAACTAtggtgtaagtgctgagctgctgaag	7	mmu-mir-182,rno-mir-182,cgr-mir-182,eca-mir-182,cfa-mir-182,efu-mir-182,ssc-mir-182,	mmu-mir-182	accattTTTGGCAATGGTAGAACTCACACCGgtaaggtaatgggacccgGTGGTTCTAGACTTGCCAACTatggt	mmu-miR-182-3p	GTGGTTCTAGACTTGCCAACT	3'	Diff	gp1a	..((.(((.(((...(((((..((((((..(((((((...((((((...((((((..............))))))))))))...)))))))..))))))..)).))).))).)))))..	115	53.8	-45.1	18	24	20	13	11	10	32.883	23.3107	21.8162	10.8085	8.99674	7.59914	middle
133	234	mmu-miR-183-5p	TATGGCACTGGTAGAATTCACT	22	chr6	-	30169649	30169755	gagagtgtgactcctgtcctgtgTATGGCACTGGTAGAATTCACTgtgaacagtctcagtcagTGAATTACCGAAGGGCCATAAAcagagcagagacagatccgcga	35	mmu-mir-183,rno-mir-183,cpo-mir-183,cgr-mir-183,hsa-mir-183,ptr-mir-183,ggo-mir-183,ppa-mir-183,bta-mir-183,ssc-mir-183,eca-mir-183,mdo-mir-183,ppy-mir-183,mml-mir-183,mne-mir-183,cja-mir-183,cfa-mir-183,pal-mir-183,dno-mir-183,ocu-mir-183,tch-mir-183,chi-mir-183,sla-mir-183,gga-mir-183,oni-mir-183-2,oni-mir-183-1,gmo-mir-183,dre-mir-183,cli-mir-183,tgu-mir-183,ola-mir-183-2,xla-mir-183,ccr-mir-1…	mmu-mir-183	ctgtgTATGGCACTGGTAGAATTCACTgtgaacagtctcagtcaGTGAATTACCGAAGGGCCATAAacag	mmu-miR-183-5p	TATGGCACTGGTAGAATTCACT	5'	Yes	gp1a	....(((.((.(((((..((((.((((((..(((((..(((((((((((......)))..)))))))))))))....)))))).))))..))).))....)))))..	101	49.5	-37.8	392	102	231	428	369	507	716.118	99.0707	251.977	355.85	301.8	385.276	middle
133	235	mmu-miR-183-3p_L-1R+1	TGAATTACCGAAGGGCCATAAC	22	chr6	-	30169649	30169755	gagagtgtgactcctgtcctgtgTATGGCACTGGTAGAATTCACTgtgaacagtctcagtcagTGAATTACCGAAGGGCCATAAAcagagcagagacagatccgcga	35	mmu-mir-183,rno-mir-183,cpo-mir-183,cgr-mir-183,hsa-mir-183,ptr-mir-183,ggo-mir-183,ppa-mir-183,bta-mir-183,ssc-mir-183,eca-mir-183,mdo-mir-183,ppy-mir-183,mml-mir-183,mne-mir-183,cja-mir-183,cfa-mir-183,pal-mir-183,dno-mir-183,ocu-mir-183,tch-mir-183,chi-mir-183,sla-mir-183,gga-mir-183,oni-mir-183-2,oni-mir-183-1,gmo-mir-183,dre-mir-183,cli-mir-183,tgu-mir-183,ola-mir-183-2,xla-mir-183,ccr-mir-1…	mmu-mir-183	ctgtgTATGGCACTGGTAGAATTCACTgtgaacagtctcagtcaGTGAATTACCGAAGGGCCATAAacag	mmu-miR-183-3p	GTGAATTACCGAAGGGCCATAA	3'	Diff	gp1a	....(((.((.(((((..((((.((((((..(((((..(((((((((((......)))..)))))))))))))....)))))).))))..))).))....)))))..	101	49.5	-37.8	5	0	0	0	0	0	9.13416	0	0	0	0	0	low
134	236	mmu-miR-184-3p	TGGACGGAGAACTGATAAGGGT	22	chr9	-	89802254	89802328	cctttccttatcacttttccagccagctttgtgactctaagtgtTGGACGGAGAACTGATAAGGGTaggtgactg	9	mmu-mir-184,cpo-mir-184,eca-mir-184,cja-mir-184,cfa-mir-184,pal-mir-184,dno-mir-184,tch-mir-184,oga-mir-184,	mmu-mir-184	cctttCCTTATCACTTTTCCAGCCAGCtttgtgactctaagtgtTGGACGGAGAACTGATAAGGGTagg	mmu-miR-184-3p	TGGACGGAGAACTGATAAGGGT	3'	Yes	gp1a	(((..((((((((.((((((..(((((((((......)))).)))))..)))))).))))))))..)))......	69	46.7	-29.4	13	10	16	17	12	18	23.7488	9.71281	17.453	14.1342	9.81463	13.6785	middle
135	237	mmu-miR-185-5p	TGGAGAGAAAGGCAGTTCCTGA	22	chr16	-	18327374	18327495	gggcagcgggcctggcttgagtggggggtgagggatTGGAGAGAAAGGCAGTTCCTGAtggtcccctcccAGGGGCTGGCTTTCCTCTGGTccttctctcccaatgactgcgtcttcatcga	19	mmu-mir-185,rno-mir-185,cpo-mir-185,cgr-mir-185,hsa-mir-185,ppy-mir-185,eca-mir-185,ptr-mir-185,mml-mir-185,cja-mir-185,cfa-mir-185,tch-mir-185,efu-mir-185,ssc-mir-185,ggo-mir-185,pal-mir-185,dno-mir-185,ocu-mir-185,oga-mir-185,	mmu-mir-185	agggatTGGAGAGAAAGGCAGTTCCTGAtggtcccctcccAGGGGCTGGCTTTCCTCTGGTcctt	mmu-miR-185-5p	TGGAGAGAAAGGCAGTTCCTGA	5'	Yes	gp1a	((((.....)))).((.....(((((((.(((((((..(((.(((((.(((..((((..((......))))))..))).))))))))..))))))))))))))......))...........	97	61.5	-60.9	3917	8349	4875	10970	6072	6807	7155.7	8109.23	5317.7	9120.73	4966.2	5172.74	high
135	238	mmu-miR-185-3p	AGGGGCTGGCTTTCCTCTGGT	21	chr16	-	18327374	18327495	gggcagcgggcctggcttgagtggggggtgagggatTGGAGAGAAAGGCAGTTCCTGAtggtcccctcccAGGGGCTGGCTTTCCTCTGGTccttctctcccaatgactgcgtcttcatcga	19	mmu-mir-185,rno-mir-185,cpo-mir-185,cgr-mir-185,hsa-mir-185,ppy-mir-185,eca-mir-185,ptr-mir-185,mml-mir-185,cja-mir-185,cfa-mir-185,tch-mir-185,efu-mir-185,ssc-mir-185,ggo-mir-185,pal-mir-185,dno-mir-185,ocu-mir-185,oga-mir-185,	mmu-mir-185	agggatTGGAGAGAAAGGCAGTTCCTGAtggtcccctcccAGGGGCTGGCTTTCCTCTGGTcctt	mmu-miR-185-3p	AGGGGCTGGCTTTCCTCTGGT	3'	Yes	gp1a	((((.....)))).((.....(((((((.(((((((..(((.(((((.(((..((((..((......))))))..))).))))))))..))))))))))))))......))...........	97	61.5	-60.9	182	399	510	562	308	473	332.484	387.541	556.313	467.261	251.909	359.439	middle
136	239	mmu-miR-186-5p	CAAAGAATTCTCCTTTTGGGCT	22	chr3	+	157544271	157544356	tgcttacaactttcCAAAGAATTCTCCTTTTGGGCTttctcattttattttaagCCCTAAGGTGAATTTTTTGGGAagtttgagct	24	mmu-mir-186,rno-mir-186,cpo-mir-186,cgr-mir-186,hsa-mir-186,ptr-mir-186,ppy-mir-186,ggo-mir-186,ppa-mir-186,bta-mir-186,chi-mir-186,eca-mir-186,mdo-mir-186,mml-mir-186,cja-mir-186,cfa-mir-186,dno-mir-186,ssc-mir-186,pal-mir-186,tch-mir-186,nle-mir-186,sbo-mir-186,oga-mir-186,dma-mir-186,	mmu-mir-186	actttcCAAAGAATTCTCCTTTTGGGCTttctcattttattttaaGCCCTAAGGTGAATTTTTTGGGaagt	mmu-miR-186-5p	CAAAGAATTCTCCTTTTGGGCT	5'	Yes	gp1a	.(((((.(((((((((((((((((.((((..((((((..............)))))).)))).)))))))))))))))))))))).	84	34.9	-40.9	1948	2306	2684	3878	4081	3472	3558.67	2239.77	2927.73	3224.26	3337.79	2638.42	middle
136	240	mmu-miR-186-3p_L-1R+1	CCCTAAGGTGAATTTTTTGGGA	22	chr3	+	157544271	157544356	tgcttacaactttcCAAAGAATTCTCCTTTTGGGCTttctcattttattttaagCCCTAAGGTGAATTTTTTGGGAagtttgagct	24	mmu-mir-186,rno-mir-186,cpo-mir-186,cgr-mir-186,hsa-mir-186,ptr-mir-186,ppy-mir-186,ggo-mir-186,ppa-mir-186,bta-mir-186,chi-mir-186,eca-mir-186,mdo-mir-186,mml-mir-186,cja-mir-186,cfa-mir-186,dno-mir-186,ssc-mir-186,pal-mir-186,tch-mir-186,nle-mir-186,sbo-mir-186,oga-mir-186,dma-mir-186,	mmu-mir-186	actttcCAAAGAATTCTCCTTTTGGGCTttctcattttattttaaGCCCTAAGGTGAATTTTTTGGGaagt	mmu-miR-186-3p	GCCCTAAGGTGAATTTTTTGGG	3'	Diff	gp1a	.(((((.(((((((((((((((((.((((..((((((..............)))))).)))).)))))))))))))))))))))).	84	34.9	-40.9	0	0	5	0	0	0	0	0	5.45405	0	0	0	low
137	241	mmu-miR-187-5p_L-2R+3	GCTACAACACAGGACCCGGGCGT	23	chr18	-	24429093	24429196	gggctcacaggatacaatgcgggtcctcagGCTACAACACAGGACCCGGGCGCtgctctgaccccTCGTGTCTTGTGTTGCAGCCGGAgggacgcaggtctgca	12	mmu-mir-187,rno-mir-187,cpo-mir-187,cgr-mir-187,eca-mir-187,cja-mir-187,cfa-mir-187,ssc-mir-187,pal-mir-187,dno-mir-187,ocu-mir-187,mmr-mir-187,	mmu-mir-187	tcAGGCTACAACACAGGACCCGGGcgctgctctgaccccTCGTGTCTTGTGTTGCAGCCGG	mmu-miR-187-5p	AGGCTACAACACAGGACCCGGG	5'	Diff	gp1a	.......((((......((((..(((((.((((.(((((((((((.((((..............)))).))))))))))).)))).))))).))))..))))..	95	63.5	-44.8	0	0	0	10	0	0	0	0	0	8.31424	0	0	low
137	242	mmu-miR-187-3p_R+1	TCGTGTCTTGTGTTGCAGCCGGA	23	chr18	-	24429093	24429196	gggctcacaggatacaatgcgggtcctcagGCTACAACACAGGACCCGGGCGCtgctctgaccccTCGTGTCTTGTGTTGCAGCCGGAgggacgcaggtctgca	12	mmu-mir-187,rno-mir-187,cpo-mir-187,cgr-mir-187,eca-mir-187,cja-mir-187,cfa-mir-187,ssc-mir-187,pal-mir-187,dno-mir-187,ocu-mir-187,mmr-mir-187,	mmu-mir-187	tcAGGCTACAACACAGGACCCGGGcgctgctctgaccccTCGTGTCTTGTGTTGCAGCCGG	mmu-miR-187-3p	TCGTGTCTTGTGTTGCAGCCGG	3'	Diff	gp1a	.......((((......((((..(((((.((((.(((((((((((.((((..............)))).))))))))))).)))).))))).))))..))))..	95	63.5	-44.8	11	33	34	45	63	62	20.0952	32.0523	37.0875	37.4141	51.5268	47.1147	middle
138	243	mmu-miR-188-5p	CATCCCTTGCATGGTGGAGGG	21	chrX	-	7247961	7248071	cttccctgctccctctctcaCATCCCTTGCATGGTGGAGGGtgagctctctgaaaacccCTCCCACATGCAGGGTTTGCAggatggtgagcttcagctttccttgctctct	21	mmu-mir-188,rno-mir-188,cpo-mir-188,cgr-mir-188,hsa-mir-188,ppy-mir-188,ppa-mir-188,bta-mir-188,eca-mir-188,ptr-mir-188,mml-mir-188,mne-mir-188,cfa-mir-188,efu-mir-188,ggo-mir-188,pal-mir-188,dno-mir-188,ocu-mir-188,chi-mir-188,tch-mir-188,mmr-mir-188,	mmu-mir-188	tctcaCATCCCTTGCATGGTGGAGGGtgagctctctgaaaacccCTCCCACATGCAGGGTTTGCAgga	mmu-miR-188-5p	CATCCCTTGCATGGTGGAGGG	5'	Yes	gp1a	.......((((((..(((..((..(((((((((..((((((................))))))..)))))))))..))..))).)).))))...(((.......)))....	84	55.9	-41.3	23	27	54	65	96	79	42.0171	26.2246	58.9038	54.0426	78.517	60.0332	middle
138	244	mmu-miR-188-3p	CTCCCACATGCAGGGTTTGCA	21	chrX	-	7247961	7248071	cttccctgctccctctctcaCATCCCTTGCATGGTGGAGGGtgagctctctgaaaacccCTCCCACATGCAGGGTTTGCAggatggtgagcttcagctttccttgctctct	21	mmu-mir-188,rno-mir-188,cpo-mir-188,cgr-mir-188,hsa-mir-188,ppy-mir-188,ppa-mir-188,bta-mir-188,eca-mir-188,ptr-mir-188,mml-mir-188,mne-mir-188,cfa-mir-188,efu-mir-188,ggo-mir-188,pal-mir-188,dno-mir-188,ocu-mir-188,chi-mir-188,tch-mir-188,mmr-mir-188,	mmu-mir-188	tctcaCATCCCTTGCATGGTGGAGGGtgagctctctgaaaacccCTCCCACATGCAGGGTTTGCAgga	mmu-miR-188-3p	CTCCCACATGCAGGGTTTGCA	3'	Yes	gp1a	.......((((((..(((..((..(((((((((..((((((................))))))..)))))))))..))..))).)).))))...(((.......)))....	84	55.9	-41.3	9	5	14	13	12	9	16.4415	4.85641	15.2713	10.8085	9.81463	6.83923	middle
139	245	mmu-miR-190a-5p_R+1	TGATATGTTTGATATATTAGGTT	23	chr9	-	67236632	67236751	acctggatgccttttctgcaggcctctgtgTGATATGTTTGATATATTAGGTTgttatttaatccaACTATATATCAAGCATATTCCTacagtgtcttgccctgtctccgggggtcctaa	32	mmu-mir-190a,rno-mir-190a-2,rno-mir-190a-1,cpo-mir-190a,dno-mir-190a,ocu-mir-190a,tch-mir-190a,nle-mir-190,oga-mir-190,cgr-mir-190a,hsa-mir-190a,bta-mir-190a,ptr-mir-190a,ppy-mir-190a,mml-mir-190a,cfa-mir-190a,ggo-mir-190a,ppa-mir-190,eca-mir-190a,mdo-mir-190a,cja-mir-190a,ssc-mir-190a,chi-mir-190a,gga-mir-190a,oni-mir-190a-2,gmo-mir-190a-2,oni-mir-190a-1,cli-mir-190,tgu-mir-190,ccr-mir-190,tni-m…	mmu-mir-190a	ctgtgTGATATGTTTGATATATTAGGTtgttatttaatccaACTATATATCAAGCATATTCCTacag	mmu-miR-190a-5p	TGATATGTTTGATATATTAGGT	5'	Diff	gp1a	.((((((..(.......(((((...(((((.((((((((((((((((..(((((..........)))))))))))))))))))))..)))))...)))))...)..))))))........	111	41.7	-39.8	109	215	175	125	281	269	199.125	208.825	190.892	103.928	229.826	204.417	middle
139	246	mmu-miR-190a-3p	ACTATATATCAAGCATATTCCT	22	chr9	-	67236632	67236751	acctggatgccttttctgcaggcctctgtgTGATATGTTTGATATATTAGGTTgttatttaatccaACTATATATCAAGCATATTCCTacagtgtcttgccctgtctccgggggtcctaa	32	mmu-mir-190a,rno-mir-190a-2,rno-mir-190a-1,cpo-mir-190a,dno-mir-190a,ocu-mir-190a,tch-mir-190a,nle-mir-190,oga-mir-190,cgr-mir-190a,hsa-mir-190a,bta-mir-190a,ptr-mir-190a,ppy-mir-190a,mml-mir-190a,cfa-mir-190a,ggo-mir-190a,ppa-mir-190,eca-mir-190a,mdo-mir-190a,cja-mir-190a,ssc-mir-190a,chi-mir-190a,gga-mir-190a,oni-mir-190a-2,gmo-mir-190a-2,oni-mir-190a-1,cli-mir-190,tgu-mir-190,ccr-mir-190,tni-m…	mmu-mir-190a	ctgtgTGATATGTTTGATATATTAGGTtgttatttaatccaACTATATATCAAGCATATTCCTacag	mmu-miR-190a-3p	ACTATATATCAAGCATATTCCT	3'	Yes	gp1a	.((((((..(.......(((((...(((((.((((((((((((((((..(((((..........)))))))))))))))))))))..)))))...)))))...)..))))))........	111	41.7	-39.8	0	0	7	0	7	0	0	0	7.63567	0	5.7252	0	low
140	247	mmu-miR-190b-5p	TGATATGTTTGATATTGGGTTG	22	chr3	+	90070017	90070099	gcctgcttctgtgTGATATGTTTGATATTGGGTTGttaaattatgaaccaactgaatgtcaagcatactctcacagcagtaag	14	mmu-mir-190b,rno-mir-190b,cgr-mir-190b,hsa-mir-190b,ppy-mir-190b,bta-mir-190b,eca-mir-190b,ptr-mir-190b,mdo-mir-190b,mml-mir-190b,cja-mir-190b,cfa-mir-190b,ssc-mir-190b,chi-mir-190b,	mmu-mir-190b	tgcttctgtgTGATATGTTTGATATTGGGTTGttaaattatgaaccaACTGAATGTCAAGCATACTCTCAcagcagtaag	mmu-miR-190b-5p	TGATATGTTTGATATTGGGTTG	5'	Yes	gp1a	...((((.(((((.(((((((((((((((..((((((........)).))))..))))))))))))).)).))))).))))..	78	38.6	-30.7	6	28	16	60	81	48	10.961	27.1959	17.453	49.8855	66.2487	36.4759	middle
141	248	mmu-miR-191-5p	CAACGGAATCCCAAAAGCAGCTG	23	chr9	+	108568306	108568417	ccaatggctggacagcgggCAACGGAATCCCAAAAGCAGCTGttgtctccagagcattccaGCTGCACTTGGATTTCGTTCCCtgctctcctgcctgagcagcgccctggcc	28	mmu-mir-191,rno-mir-191a,cpo-mir-191,cgr-mir-191,hsa-mir-191,ppy-mir-191,mml-mir-191,bta-mir-191,oar-mir-191,eca-mir-191a,ptr-mir-191,mdo-mir-191,cja-mir-191,cfa-mir-191,dno-mir-191,tch-mir-191,oga-mir-191,mmr-mir-191,dma-mir-191,efu-mir-191,ssc-mir-191,ggo-mir-191,pal-mir-191,ocu-mir-191,chi-mir-191,ppa-mir-191,sbo-mir-191,nle-mir-191,	mmu-mir-191	agcgggCAACGGAATCCCAAAAGCAGCTGttgtctccagagcattccaGCTGCACTTGGATTTCGTTCCCtgct	mmu-miR-191-5p	CAACGGAATCCCAAAAGCAGCTG	5'	Yes	gp1a	.....(((.(((.((((((.((((((((((.((..(((((((..((((....)).))..)))))))..)))))))))))).)))))).))).)))........((....)).	90	59.8	-50.7	45901	73285	51935	136761	130920	100802	83853.4	71180.3	56651.2	113706	107078	76600.9	high
141	249	mmu-miR-191-3p	GCTGCACTTGGATTTCGTTCCC	22	chr9	+	108568306	108568417	ccaatggctggacagcgggCAACGGAATCCCAAAAGCAGCTGttgtctccagagcattccaGCTGCACTTGGATTTCGTTCCCtgctctcctgcctgagcagcgccctggcc	28	mmu-mir-191,rno-mir-191a,cpo-mir-191,cgr-mir-191,hsa-mir-191,ppy-mir-191,mml-mir-191,bta-mir-191,oar-mir-191,eca-mir-191a,ptr-mir-191,mdo-mir-191,cja-mir-191,cfa-mir-191,dno-mir-191,tch-mir-191,oga-mir-191,mmr-mir-191,dma-mir-191,efu-mir-191,ssc-mir-191,ggo-mir-191,pal-mir-191,ocu-mir-191,chi-mir-191,ppa-mir-191,sbo-mir-191,nle-mir-191,	mmu-mir-191	agcgggCAACGGAATCCCAAAAGCAGCTGttgtctccagagcattccaGCTGCACTTGGATTTCGTTCCCtgct	mmu-miR-191-3p	GCTGCACTTGGATTTCGTTCCC	3'	Yes	gp1a	.....(((.(((.((((((.((((((((((.((..(((((((..((((....)).))..)))))))..)))))))))))).)))))).))).)))........((....)).	90	59.8	-50.7	5	24	13	72	82	33	9.13416	23.3107	14.1805	59.8626	67.0666	25.0772	middle
142	250	mmu-miR-192-5p	CTGACCTATGAATTGACAGCC	21	chr19	+	6264836	6264945	caagatggcgtgcacagggctCTGACCTATGAATTGACAGCCagtactcttttctctcctctggctgccaattccataggtcacaggtatgttcacctcaatgccagcca	20	mmu-mir-192,rno-mir-192,cpo-mir-192,cgr-mir-192,hsa-mir-192,ppy-mir-192,bta-mir-192,eca-mir-192,ptr-mir-192,mml-mir-192,cfa-mir-192,efu-mir-192,ssc-mir-192,ggo-mir-192,dno-mir-192,chi-mir-192,tch-mir-192,ppa-mir-192,nle-mir-192,oga-mir-192,	mmu-mir-192	cgtgcacagggctCTGACCTATGAATTGACAGCCagtactcttttctctcctctggCTGCCAATTCCATAGGTCACAGgtatgttcacc	mmu-miR-192-5p	CTGACCTATGAATTGACAGCC	5'	Yes	gp1a	.....(((((((.(((..(((.((((((((((((((.(((((((................))))))).))))).)))))))))..))).))).)))......))))....	101	50.9	-40.6	589	965	631	2740	2432	1910	1076	937.286	688.301	2278.1	1989.1	1451.44	middle
143	251	mmu-miR-193a-5p	TGGGTCTTTGCGGGCAAGATGA	22	chr11	+	79711957	79712041	cggacgggagctgagagcTGGGTCTTTGCGGGCAAGATGAgagtgtcagttcAACTGGCCTACAAAGTCCCAgtcctcggtcccc	16	mmu-mir-193a,rno-mir-193a,cpo-mir-193a,cfa-mir-193a,dno-mir-193a,ocu-mir-193a,cgr-mir-193a,bta-mir-193a,eca-mir-193a,mdo-mir-193a,ppy-mir-193a,mml-mir-193a,efu-mir-193a,ssc-mir-193a,tch-mir-193a-2,tch-mir-193a-1,	mmu-mir-193a	gagagcTGGGTCTTTGCGGGCAAGATGAgagtgtcagttcAACTGGCCTACAAAGTCCCAGTcctc	mmu-miR-193a-5p	TGGGTCTTTGCGGGCAAGATGA	5'	Yes	gp1a	.....(((..(((((..(((((.(((((..(((.((.((((........)))).)).)))..))))).)))))..)))))..)))	80	60	-44.4	198	434	261	506	458	630	361.713	421.536	284.701	420.701	374.592	478.746	middle
143	252	mmu-miR-193a-3p_R-2	AACTGGCCTACAAAGTCCCA	20	chr11	+	79711957	79712041	cggacgggagctgagagcTGGGTCTTTGCGGGCAAGATGAgagtgtcagttcAACTGGCCTACAAAGTCCCAgtcctcggtcccc	16	mmu-mir-193a,rno-mir-193a,cpo-mir-193a,cfa-mir-193a,dno-mir-193a,ocu-mir-193a,cgr-mir-193a,bta-mir-193a,eca-mir-193a,mdo-mir-193a,ppy-mir-193a,mml-mir-193a,efu-mir-193a,ssc-mir-193a,tch-mir-193a-2,tch-mir-193a-1,	mmu-mir-193a	gagagcTGGGTCTTTGCGGGCAAGATGAgagtgtcagttcAACTGGCCTACAAAGTCCCAGTcctc	mmu-miR-193a-3p	AACTGGCCTACAAAGTCCCAGT	3'	Diff	gp1a	.....(((..(((((..(((((.(((((..(((.((.((((........)))).)).)))..))))).)))))..)))))..)))	80	60	-44.4	6	0	6	0	6	5	10.961	0	6.54486	0	4.90731	3.79957	middle
144	253	mmu-miR-193b-5p	CGGGGTTTTGAGGGCGAGATGA	22	chr16	+	13449513	13449622	ggaggcggtgggcccagaatCGGGGTTTTGAGGGCGAGATGAgtttgtgttttatccAACTGGCCCACAAAGTCCCGCTtttggggtcatcctaacagcaaaggattcag	27	mmu-mir-193b,rno-mir-193b,cpo-mir-193b,mdo-mir-193b,pal-mir-193b,ocu-mir-193b,tch-mir-193b,oga-mir-193b,mmr-mir-193,dma-mir-193,cgr-mir-193b,hsa-mir-193b,ppy-mir-193b,mml-mir-193b,bta-mir-193b,eca-mir-193b,ptr-mir-193b,cja-mir-193,cfa-mir-193b,efu-mir-193b,dno-mir-193b,chi-mir-193b,chi-mir-193a,nle-mir-193b,gga-mir-193b,cli-mir-193,tgu-mir-193a,	mmu-mir-193b	ggcccagaatCGGGGTTTTGAGGGCGAGATGAgtttgtgttttatccAACTGGCCCACAAAGTCCCGCTtttggggtca	mmu-miR-193b-5p	CGGGGTTTTGAGGGCGAGATGA	5'	Yes	gp1a	...((.((((..(((((((.((((..((((.((((.((.((..(.........)..)).)).)))).))))..)))).)))))))..)))))).................	90	53.6	-41.8	47	164	100	65	111	155	85.8611	159.29	109.081	54.0426	90.7853	117.787	middle
144	254	mmu-miR-193b-3p	AACTGGCCCACAAAGTCCCGCT	22	chr16	+	13449513	13449622	ggaggcggtgggcccagaatCGGGGTTTTGAGGGCGAGATGAgtttgtgttttatccAACTGGCCCACAAAGTCCCGCTtttggggtcatcctaacagcaaaggattcag	27	mmu-mir-193b,rno-mir-193b,cpo-mir-193b,mdo-mir-193b,pal-mir-193b,ocu-mir-193b,tch-mir-193b,oga-mir-193b,mmr-mir-193,dma-mir-193,cgr-mir-193b,hsa-mir-193b,ppy-mir-193b,mml-mir-193b,bta-mir-193b,eca-mir-193b,ptr-mir-193b,cja-mir-193,cfa-mir-193b,efu-mir-193b,dno-mir-193b,chi-mir-193b,chi-mir-193a,nle-mir-193b,gga-mir-193b,cli-mir-193,tgu-mir-193a,	mmu-mir-193b	ggcccagaatCGGGGTTTTGAGGGCGAGATGAgtttgtgttttatccAACTGGCCCACAAAGTCCCGCTtttggggtca	mmu-miR-193b-3p	AACTGGCCCACAAAGTCCCGCT	3'	Yes	gp1a	...((.((((..(((((((.((((..((((.((((.((.((..(.........)..)).)).)))).))))..)))).)))))))..)))))).................	90	53.6	-41.8	1620	3587	5463	3092	4841	5935	2959.47	3483.99	5959.1	2570.76	3959.38	4510.09	middle
145	255	mmu-miR-194-5p	TGTAACAGCAACTCCATGTGGA	22	chr1	+	185313311	185313393	atggagtcatcgggTGTAACAGCAACTCCATGTGGActgtgctcggattccagtggagctgctgttacttctgatggcctcca	3	mmu-mir-194-1,rno-mir-194-1,ocu-mir-194,	mmu-mir-194-1	atcgggTGTAACAGCAACTCCATGTGGActgtgctcggattCCAGTGGAGCTGCTGTTACTTCtgat	mmu-miR-194-5p	TGTAACAGCAACTCCATGTGGA	5'	Yes	gp1a	.((((((((((((..(((((((((.((((((.(((((((....)))..)))))))))).)))))))))..)))))))).))))	82	53	-46.1	235	513.5	349	993.5	870.5	747.5	429.306	498.753	380.693	826.02	711.969	568.036	middle
146	256	mmu-miR-194-5p_R+1	TGTAACAGCAACTCCATGTGGAA	23	chr19	+	6264643	6264728	gtggctcccaccctcTGTAACAGCAACTCCATGTGGAAgtgcccactggttCCAGTGGGGCTGCTGTTATCTGGggtggcggctag	14	mmu-mir-194-2,rno-mir-194-2,cpo-mir-194,cgr-mir-194-2,hsa-mir-194-2,bta-mir-194-2,eca-mir-194-1,mml-mir-194-2,efu-mir-194-2,ssc-mir-194a,pal-mir-194b,dno-mir-194,tch-mir-194,oar-mir-194,	mmu-mir-194-2	gtggctcccaccctcTGTAACAGCAACTCCATGTGGAagtgcccactggttCCAGTGGGGCTGCTGTTATCTGgggtggcggctag	mmu-miR-194-5p	TGTAACAGCAACTCCATGTGGA	5'	Diff	gp1a	.((((..(((((((..(((((((((..(((....)))....(((((((....)))))))..)))))))))..)))))))..)))).	84	60.5	-49.1	655	1211.5	832	3261.5	2668.5	2495.5	1196.58	1176.71	907.554	2711.69	2182.53	1896.37	middle
146	257	mmu-miR-194-2-3p_R+1	CCAGTGGGGCTGCTGTTATCTGT	23	chr19	+	6264643	6264728	gtggctcccaccctcTGTAACAGCAACTCCATGTGGAAgtgcccactggttCCAGTGGGGCTGCTGTTATCTGGggtggcggctag	14	mmu-mir-194-2,rno-mir-194-2,cpo-mir-194,cgr-mir-194-2,hsa-mir-194-2,bta-mir-194-2,eca-mir-194-1,mml-mir-194-2,efu-mir-194-2,ssc-mir-194a,pal-mir-194b,dno-mir-194,tch-mir-194,oar-mir-194,	mmu-mir-194-2	gtggctcccaccctcTGTAACAGCAACTCCATGTGGAagtgcccactggttCCAGTGGGGCTGCTGTTATCTGgggtggcggctag	mmu-miR-194-2-3p	CCAGTGGGGCTGCTGTTATCTG	3'	Diff	gp1a	.((((..(((((((..(((((((((..(((....)))....(((((((....)))))))..)))))))))..)))))))..)))).	84	60.5	-49.1	0	7	9	40	26	30	0	6.79897	9.81729	33.257	21.265	22.7974	middle
147	258	mmu-miR-195a-5p_R+1	TAGCAGCACAGAAATATTGGCA	22	chr11	+	70235042	70235135	acacccaactctcctggctcTAGCAGCACAGAAATATTGGCAtggggaagtgagtctgCCAATATTGGCTGTGCTGCTCCAGgcagggtggtga	18	mmu-mir-195a,rno-mir-195,cgr-mir-195,hsa-mir-195,ppy-mir-195,ggo-mir-195,ppa-mir-195,bta-mir-195,eca-mir-195,ptr-mir-195,mml-mir-195,cfa-mir-195,ssc-mir-195,dno-mir-195,ocu-mir-195,chi-mir-195,nle-mir-195,mmr-mir-195,	mmu-mir-195a	acacccaactctcctggctcTAGCAGCACAGAAATATTGGCatggggaagtgagtctgCCAATATTGGCTGTGCTGCTCCaggcagggtggtga	mmu-miR-195a-5p	TAGCAGCACAGAAATATTGGC	5'	Diff	gp1a	.((((..((((((((((....((((((((((.((((((((((..((........))))))))))))..))))))))))))))).))))))))).	92	54.3	-50.3	214	826	432	498	794.667	616	390.942	802.278	471.23	414.049	649.946	468.107	middle
147	259	mmu-miR-195a-3p_R+2	CCAATATTGGCTGTGCTGCTCCAT	24	chr11	+	70235042	70235135	acacccaactctcctggctcTAGCAGCACAGAAATATTGGCAtggggaagtgagtctgCCAATATTGGCTGTGCTGCTCCAGgcagggtggtga	18	mmu-mir-195a,rno-mir-195,cgr-mir-195,hsa-mir-195,ppy-mir-195,ggo-mir-195,ppa-mir-195,bta-mir-195,eca-mir-195,ptr-mir-195,mml-mir-195,cfa-mir-195,ssc-mir-195,dno-mir-195,ocu-mir-195,chi-mir-195,nle-mir-195,mmr-mir-195,	mmu-mir-195a	acacccaactctcctggctcTAGCAGCACAGAAATATTGGCatggggaagtgagtctgCCAATATTGGCTGTGCTGCTCCaggcagggtggtga	mmu-miR-195a-3p	CCAATATTGGCTGTGCTGCTCC	3'	Diff	gp1a	.((((..((((((((((....((((((((((.((((((((((..((........))))))))))))..))))))))))))))).))))))))).	92	54.3	-50.3	5	13	0	25	17	15	9.13416	12.6267	0	20.7856	13.9041	11.3987	middle
148	260	mmu-miR-196b-5p	TAGGTAGTTTCCTGTTGTTGGG	22	chr6	-	52230081	52230165	aactggtcggtgattTAGGTAGTTTCCTGTTGTTGGGatccacctttctctcgacagcacgacactgccttcattacttcagttg	24	mmu-mir-196b,rno-mir-196b-1,rno-mir-196b-2,bta-mir-196b,chi-mir-196b,cpo-mir-196b,cfa-mir-196b,ggo-mir-196b,dno-mir-196b,ocu-mir-196b,nle-mir-196b,oga-mir-196b,mmr-mir-196b,cgr-mir-196b,hsa-mir-196b,ppy-mir-196b,eca-mir-196b,ptr-mir-196b,mdo-mir-196b,mml-mir-196b,cja-mir-196b,ssc-mir-196b-1,ssc-mir-196b-2,pal-mir-196b,	mmu-mir-196b	aactggtcggtgattTAGGTAGTTTCCTGTTGTTGGGatccacctttctcTCGACAGCACGACACTGCCTTCattacttcagttg	mmu-miR-196b-5p	TAGGTAGTTTCCTGTTGTTGGG	5'	Yes	gp1a	((((((..((((((..(((((((.((.(((((((((((..........))))))))))).)).)))))))..)))))))))))).	84	47.1	-35.8	22	27	0	173	163	252	40.1903	26.2246	0	143.836	133.315	191.498	middle
149	261	mmu-miR-199b-5p_1ss10TC	CCCAGTGTTCAGACTACCTGTTC	23	chr2	+	32318460	32318569	ccagaggatacctccactccgtctaCCCAGTGTTTAGACTACCTGTTCaggactcccaaattgtACAGTAGTCTGCACATTGGTTaggctgggctgggttagaccctcgg	32	mmu-mir-199b,cpo-mir-199-3,hsa-mir-199b,bta-mir-199b,eca-mir-199b,cja-mir-199-2,ptr-mir-199b,mdo-mir-199b-1,mdo-mir-199b-3,ppy-mir-199b,cfa-mir-199-3,cfa-mir-199-1,efu-mir-199-3,ssc-mir-199b,pal-mir-199-3,ppa-mir-199b,nle-mir-199b,mmr-mir-199-3,pal-mir-199-2,dno-mir-199-2,ocu-mir-199a-1,chi-mir-199b,chi-mir-199c,tch-mir-199b,sbo-mir-199-3,nle-mir-199a-1,oga-mir-199-2,gga-mir-199-1,aca-mir-199b,cl…	mmu-mir-199b	ccagaggatacctccactccgtctaCCCAGTGTTTAGACTACCTGTTCaggactcccaaattgtACAGTAGTCTGCACATTGGTTAggctgggctgggttagaccctcgg	mmu-miR-199b-5p	CCCAGTGTTTAGACTACCTGTTC	5'	Diff	gp1a	((.((((.....((((..(((((((.(((((((..(((((((.(((.((((....))....)).))))))))))..))))))).))))).))..))))......))))))	110	52.7	-41.4	19937	43641	32789	33039	55473	50042.7	36421.6	42387.7	35766.6	27469.4	45370.6	38028.1	high
149	262	mmu-miR-199b-3p_R-1	ACAGTAGTCTGCACATTGGTT	21	chr2	+	32318460	32318569	ccagaggatacctccactccgtctaCCCAGTGTTTAGACTACCTGTTCaggactcccaaattgtACAGTAGTCTGCACATTGGTTaggctgggctgggttagaccctcgg	32	mmu-mir-199b,cpo-mir-199-3,hsa-mir-199b,bta-mir-199b,eca-mir-199b,cja-mir-199-2,ptr-mir-199b,mdo-mir-199b-1,mdo-mir-199b-3,ppy-mir-199b,cfa-mir-199-3,cfa-mir-199-1,efu-mir-199-3,ssc-mir-199b,pal-mir-199-3,ppa-mir-199b,nle-mir-199b,mmr-mir-199-3,pal-mir-199-2,dno-mir-199-2,ocu-mir-199a-1,chi-mir-199b,chi-mir-199c,tch-mir-199b,sbo-mir-199-3,nle-mir-199a-1,oga-mir-199-2,gga-mir-199-1,aca-mir-199b,cl…	mmu-mir-199b	ccagaggatacctccactccgtctaCCCAGTGTTTAGACTACCTGTTCaggactcccaaattgtACAGTAGTCTGCACATTGGTTAggctgggctgggttagaccctcgg	mmu-miR-199b-3p	ACAGTAGTCTGCACATTGGTTA	3'	Diff	gp1a	((.((((.....((((..(((((((.(((((((..(((((((.(((.((((....))....)).))))))))))..))))))).))))).))..))))......))))))	110	52.7	-41.4	61123.3	151491	82806.7	117424	179204	144392	111662	147140	90326.4	97629.3	146569	109726	high
150	263	mmu-miR-199a-5p	CCCAGTGTTCAGACTACCTGTTC	23	chr9	-	21496488	21496568	ccccgccatCCCAGTGTTCAGACTACCTGTTCaggaggctgggacatgtACAGTAGTCTGCACATTGGTTaggctgggctt	11	mmu-mir-199a-1,cgr-mir-199a,hsa-mir-199a-1,bta-mir-199a-2,ptr-mir-199a-1,mml-mir-199a-2,efu-mir-199-2,ssc-mir-199a-2,sbo-mir-199-1,tni-mir-199-2,fru-mir-199-2,	mmu-mir-199a-1	gccatCCCAGTGTTCAGACTACCTGTTCaggaggctgggacatgtACAGTAGTCTGCACATTGGTTAggc	mmu-miR-199a-5p	CCCAGTGTTCAGACTACCTGTTC	5'	Yes	gp1a	(((.(((...(((((((.((((((((.(((((((....)))).......))))))))))).)))))))...))).)))...	78	55.6	-34.8	19937	43641	32789	33039	55473	50042.7	36421.6	42387.7	35766.6	27469.4	45370.6	38028.1	high
150	264	mmu-miR-199b-3p_R-1	ACAGTAGTCTGCACATTGGTT	21	chr9	-	21496488	21496568	ccccgccatCCCAGTGTTCAGACTACCTGTTCaggaggctgggacatgtACAGTAGTCTGCACATTGGTTaggctgggctt	11	mmu-mir-199a-1,cgr-mir-199a,hsa-mir-199a-1,bta-mir-199a-2,ptr-mir-199a-1,mml-mir-199a-2,efu-mir-199-2,ssc-mir-199a-2,sbo-mir-199-1,tni-mir-199-2,fru-mir-199-2,	mmu-mir-199a-1	gccatCCCAGTGTTCAGACTACCTGTTCaggaggctgggacatgtACAGTAGTCTGCACATTGGTTAggc	mmu-miR-199b-3p	ACAGTAGTCTGCACATTGGTTA	3'	Diff	gp1a	(((.(((...(((((((.((((((((.(((((((....)))).......))))))))))).)))))))...))).)))...	78	55.6	-34.8	61123.3	151491	82806.7	117424	179204	144392	111662	147140	90326.4	97629.3	146569	109726	high
151	265	mmu-miR-199a-5p	CCCAGTGTTCAGACTACCTGTTC	23	chr1	+	162217814	162217923	tggaagcttcaggagatcctgctccgtcgcCCCAGTGTTCAGACTACCTGTTCaggacaatgccgttgtACAGTAGTCTGCACATTGGTTagactgggcaagggccagca	49	mmu-mir-199a-2,rno-mir-199a,cgr-mir-199a-2,cpo-mir-199-2,dno-mir-199-1,ocu-mir-199a-2,cpo-mir-199-1,hsa-mir-199a-2,ptr-mir-199a-2,ppy-mir-199a,mml-mir-199a-1,ggo-mir-199a,ppa-mir-199a,mne-mir-199a,sla-mir-199a,bta-mir-199a-1,oar-mir-199a,eca-mir-199a,mdo-mir-199b-2,cfa-mir-199-2,efu-mir-199-1,ssc-mir-199a-1,pal-mir-199-1,tch-mir-199a,nle-mir-199a-2,oga-mir-199-1,mmr-mir-199-1,dma-mir-199,sbo-mir-…	mmu-mir-199a-2	tggaagcttcaggagatcctgctccgtcgcCCCAGTGTTCAGACTACCTGTTCaggacaatgccgttgtACAGTAGTCTGCACATTGGTTAgactgggcaagggccagca	mmu-miR-199a-5p	CCCAGTGTTCAGACTACCTGTTC	5'	Yes	gp1a	.....(((...((...((((((((.(((...(((((((.((((((((.(((...((......)).....))))))))))).)))))))...))).))))).)))))))).	104	54.5	-43.2	19937	43641	32789	33039	55473	50042.7	36421.6	42387.7	35766.6	27469.4	45370.6	38028.1	high
151	266	mmu-miR-199b-3p_R-1	ACAGTAGTCTGCACATTGGTT	21	chr1	+	162217814	162217923	tggaagcttcaggagatcctgctccgtcgcCCCAGTGTTCAGACTACCTGTTCaggacaatgccgttgtACAGTAGTCTGCACATTGGTTagactgggcaagggccagca	49	mmu-mir-199a-2,rno-mir-199a,cgr-mir-199a-2,cpo-mir-199-2,dno-mir-199-1,ocu-mir-199a-2,cpo-mir-199-1,hsa-mir-199a-2,ptr-mir-199a-2,ppy-mir-199a,mml-mir-199a-1,ggo-mir-199a,ppa-mir-199a,mne-mir-199a,sla-mir-199a,bta-mir-199a-1,oar-mir-199a,eca-mir-199a,mdo-mir-199b-2,cfa-mir-199-2,efu-mir-199-1,ssc-mir-199a-1,pal-mir-199-1,tch-mir-199a,nle-mir-199a-2,oga-mir-199-1,mmr-mir-199-1,dma-mir-199,sbo-mir-…	mmu-mir-199a-2	tggaagcttcaggagatcctgctccgtcgcCCCAGTGTTCAGACTACCTGTTCaggacaatgccgttgtACAGTAGTCTGCACATTGGTTAgactgggcaagggccagca	mmu-miR-199b-3p	ACAGTAGTCTGCACATTGGTTA	3'	Diff	gp1a	.....(((...((...((((((((.(((...(((((((.((((((((.(((...((......)).....))))))))))).)))))))...))).))))).)))))))).	104	54.5	-43.2	61123.3	151491	82806.7	117424	179204	144392	111662	147140	90326.4	97629.3	146569	109726	high
152	267	mmu-miR-200a-5p	CATCTTACCGGACAGTGCTGGA	22	chr4	-	156054896	156054985	ctgggcctctgtgggCATCTTACCGGACAGTGCTGGAtttcttggcttgactcTAACACTGTCTGGTAACGATGTtcaaaggtgacccac	16	mmu-mir-200a,cfa-mir-200a,rno-mir-200a,cpo-mir-200a,cgr-mir-200a,hsa-mir-200a,bta-mir-200a,oar-mir-200a,eca-mir-200a,ptr-mir-200a,mdo-mir-200a,ppy-mir-200a,mml-mir-200a,efu-mir-200a,pal-mir-200a,chi-mir-200a,	mmu-mir-200a	ctgggcctctgtgggCATCTTACCGGACAGTGCTGGAtttcttggcttgactcTAACACTGTCTGGTAACGATGTtcaaaggtgacccac	mmu-miR-200a-5p	CATCTTACCGGACAGTGCTGGA	5'	Yes	gp1a	.((((..(((.((..(((((((((((((((((.((((..((.......)).)))).))))))))))))).))))..)).)))...)))).	88	52.2	-41.8	17	21	17	18	11	14	31.0562	20.3969	18.5438	14.9656	8.99674	10.6388	middle
152	268	mmu-miR-200a-3p	TAACACTGTCTGGTAACGATGT	22	chr4	-	156054896	156054985	ctgggcctctgtgggCATCTTACCGGACAGTGCTGGAtttcttggcttgactcTAACACTGTCTGGTAACGATGTtcaaaggtgacccac	16	mmu-mir-200a,cfa-mir-200a,rno-mir-200a,cpo-mir-200a,cgr-mir-200a,hsa-mir-200a,bta-mir-200a,oar-mir-200a,eca-mir-200a,ptr-mir-200a,mdo-mir-200a,ppy-mir-200a,mml-mir-200a,efu-mir-200a,pal-mir-200a,chi-mir-200a,	mmu-mir-200a	ctgggcctctgtgggCATCTTACCGGACAGTGCTGGAtttcttggcttgactcTAACACTGTCTGGTAACGATGTtcaaaggtgacccac	mmu-miR-200a-3p	TAACACTGTCTGGTAACGATGT	3'	Yes	gp1a	.((((..(((.((..(((((((((((((((((.((((..((.......)).)))).))))))))))))).))))..)).)))...)))).	88	52.2	-41.8	48	66	58	93	44	36	87.688	64.1046	63.267	77.3225	35.987	27.3569	middle
153	269	mmu-miR-200c-3p	TAATACTGCCGGGTAATGATGGA	23	chr6	-	124718314	124718403	ggttgggtaggggccctcgtcttacccagcagtgtttgggtgctggttgggagtctcTAATACTGCCGGGTAATGATGGAggcccctgtc	19	mmu-mir-200c,rno-mir-200c,cpo-mir-200c,cgr-mir-200c,hsa-mir-200c,ppy-mir-200c,mml-mir-200c,bta-mir-200c,oar-mir-200c,eca-mir-200c,mdo-mir-200c,cja-mir-200c,cfa-mir-200c,pal-mir-200c,ocu-mir-200c,efu-mir-200c,ggo-mir-200c,chi-mir-200c,tch-mir-200c,	mmu-mir-200c	ccctCGTCTTACCCAGCAGTGTTTGGgtgctggttgggagtctcTAATACTGCCGGGTAATGATGGAgg	mmu-miR-200c-3p	TAATACTGCCGGGTAATGATGGA	3'	Yes	gp1a	.....(..(((((((..((((((((((.((((((((.(((.(((.......)))))).)))))))).)))))).))))..)))))))..)	85	58.9	-49.2	136	174	246	370	227	261	248.449	169.003	268.339	307.627	185.66	198.338	middle
154	270	mmu-miR-200b-5p	CATCTTACTGGGCAGCATTGGA	22	chr4	-	156055670	156055763	tccaacttgggcagccgtggcCATCTTACTGGGCAGCATTGGAtagtgtctgatctcTAATACTGCCTGGTAATGATGAcggcggagccctgca	15	mmu-mir-200b,rno-mir-200b,cpo-mir-200b,cgr-mir-200b,hsa-mir-200b,bta-mir-200b,oar-mir-200b,eca-mir-200b,mdo-mir-200b,cfa-mir-200b,efu-mir-200b,ssc-mir-200b,pal-mir-200b,tch-mir-200b,xla-mir-200b,	mmu-mir-200b	gccgtggcCATCTTACTGGGCAGCATTGGAtagtgtctgatctcTAATACTGCCTGGTAATGATGAcggc	mmu-miR-200b-5p	CATCTTACTGGGCAGCATTGGA	5'	Yes	gp1a	........((((.(((((...((((((((..(((((.((((((............)))))).)))))..)))).)))))))))...))))....	82	54.3	-39.5	0	0	6	5	0	0	0	0	6.54486	4.15712	0	0	low
154	271	mmu-miR-200b-3p	TAATACTGCCTGGTAATGATGA	22	chr4	-	156055670	156055763	tccaacttgggcagccgtggcCATCTTACTGGGCAGCATTGGAtagtgtctgatctcTAATACTGCCTGGTAATGATGAcggcggagccctgca	15	mmu-mir-200b,rno-mir-200b,cpo-mir-200b,cgr-mir-200b,hsa-mir-200b,bta-mir-200b,oar-mir-200b,eca-mir-200b,mdo-mir-200b,cfa-mir-200b,efu-mir-200b,ssc-mir-200b,pal-mir-200b,tch-mir-200b,xla-mir-200b,	mmu-mir-200b	gccgtggcCATCTTACTGGGCAGCATTGGAtagtgtctgatctcTAATACTGCCTGGTAATGATGAcggc	mmu-miR-200b-3p	TAATACTGCCTGGTAATGATGA	3'	Yes	gp1a	........((((.(((((...((((((((..(((((.((((((............)))))).)))))..)))).)))))))))...))))....	82	54.3	-39.5	53	97	56	180	48	68	96.8221	94.2143	61.0854	149.656	39.2585	51.6742	middle
155	272	mmu-miR-201-5p	TACTCAGTAAGGCATTGTTCTT	22	chrX	-	67988096	67988161	tacctTACTCAGTAAGGCATTGTTCTTctatattaataaatgaacagtgcctttctgtgtagggta	1	mmu-mir-201,	mmu-mir-201	tacctTACTCAGTAAGGCATTGTTCTTctatattaataaaTGAACAGTGCCTTTCTGTGTAGGgta	mmu-miR-201-5p	TACTCAGTAAGGCATTGTTCTT	5'	Yes	gp1a	((((((((.(((.((((((((((((...(((....)))...)))))))))))).))).))))))))	66	34.8	-32.6	0	0	0	6	6	0	0	0	0	4.98855	4.90731	0	low
156	273	mmu-miR-202-5p	TTCCTATGCATATACTTCTTT	21	chr7	-	139957689	139957760	gttcctttTTCCTATGCATATACTTCTTTgtggatctggtctaaagaggtatagcgcatgggaagatggagc	6	mmu-mir-202,rno-mir-202,cgr-mir-202,cfa-mir-202,tgu-mir-202-1,tgu-mir-202-2,	mmu-mir-202	gttcctttTTCCTATGCATATACTTCTTTgtggatctggtctaaAGAGGTATAGCGCATGGGAAGAtggagc	mmu-miR-202-5p	TTCCTATGCATATACTTCTTT	5'	Yes	gp1a	(((((.(((((((((((.((((((((((..(((((...)))))))))))))))..))))))))))).)))))	72	43.1	-35.4	0	0	0	9	5	0	0	0	0	7.48282	4.08943	0	low
157	274	mmu-miR-203-3p	GTGAAATGTTTAGGACCACTAG	22	chr12	+	112130875	112130965	ggcgcgcctggtccagtggttcttgacagttcaacagttctgtagcacaattGTGAAATGTTTAGGACCACTAGacccggcgcgcacggcg	5	mmu-mir-203,rno-mir-203a,cpo-mir-203,cja-mir-203,cfa-mir-203,	mmu-mir-203	gcctggtccAGTGGTTCTTGACAGTTCAACAgttctgtagcacaattGTGAAATGTTTAGGACCACTAGacccggc	mmu-miR-203-3p	GTGAAATGTTTAGGACCACTAG	3'	Yes	gp1a	.(((((((.((((.(((((((((..(((.((((.(((((.((...)).))))))))).)))..))))))))).)))).)))))))......	84	56	-48.4	16	64	28	37	64	49	29.2293	62.162	30.5427	30.7627	52.3447	37.2358	middle
158	275	mmu-miR-204-5p	TTCCCTTTGTCATCCTATGCCT	22	chr19	+	22750555	22750698	aggagctcctgaccgtgtaccatggctacagtccttcttcatgtgactcgtggacTTCCCTTTGTCATCCTATGCCTgagaatatatgaaggaggctgggaaggcaaagggacgttcaattgtcatcactggcatcttttttga	29	mmu-mir-204,eca-mir-204b-2,rno-mir-204,cpo-mir-204,cfa-mir-204,pal-mir-204,dno-mir-204,ocu-mir-204,mmr-mir-204,cgr-mir-204,hsa-mir-204,ptr-mir-204,ppy-mir-204,mml-mir-204,ggo-mir-204,ppa-mir-204,mne-mir-204,sla-mir-204,bta-mir-204,cja-mir-204,efu-mir-204,ssc-mir-204,chi-mir-204,sha-mir-204,gga-mir-204-1,aca-mir-204a-2,cli-mir-204-1,tgu-mir-204-1,xtr-mir-204-2,	mmu-mir-204	tggacTTCCCTTTGTCATCCTATGCCTgagaatatatgaaggagGCTGGGAAGGCAAAGGGACGTtca	mmu-miR-204-5p	TTCCCTTTGTCATCCTATGCCT	5'	Yes	gp1a	(((((((.(((.(((((...)))))...)))...........(((((...(((((.((((((((((.(((((.((((...............))))))))).)))))))))).)))))...)))))....))).))))......	84	47.9	-49.4	0	17	5	0	69	55	0	16.5118	5.45405	0	56.4341	41.7953	middle
159	276	mmu-miR-205-5p	TCCTTCATTCCACCGGAGTCTG	22	chr1	-	193507449	193507556	aaacagccccagacaatccatgggtcctcttgTCCTTCATTCCACCGGAGTCTGtcttatgccaaccagatttcagtggagtgaagctcaggaggcatggagctgcca	20	mmu-mir-205,rno-mir-205,cpo-mir-205,cgr-mir-205,hsa-mir-205,ptr-mir-205,ggo-mir-205,ppa-mir-205,bta-mir-205,cfa-mir-205,eca-mir-205,ppy-mir-205,cja-mir-205,efu-mir-205,ssc-mir-205,pal-mir-205,dno-mir-205,ocu-mir-205,gga-mir-205a,gmo-mir-205-2,	mmu-mir-205	ctcttgTCCTTCATTCCACCGGAGTCTGtcttatgccaaccaGATTTCAGTGGAGTGAAGCTCAggag	mmu-miR-205-5p	TCCTTCATTCCACCGGAGTCTG	5'	Yes	gp1a	...((((.........((((((...(((((((..(((((((((((.((((((((............)))))))).)))))))))))..)))))))))))))))))...	102	52.8	-48.4	32	15	52	28	28	34	58.4586	14.5692	56.7221	23.2799	22.9008	25.8371	middle
160	277	mmu-miR-206-3p	TGGAATGTAAGGAAGTGTGTGG	22	chr1	+	20679004	20679088	gcttccccaggccacatgcttctttatatcctcatagatatctcagcactaTGGAATGTAAGGAAGTGTGTGGttttggcaagtg	10	mmu-mir-206,rno-mir-206,cgr-mir-206,hsa-mir-206,ppy-mir-206,mml-mir-206,mne-mir-206,eca-mir-206-2,ptr-mir-206,pol-mir-206,	mmu-mir-206	ccaggccACATGCTTCTTTATATCCTCATAgatatctcagcactaTGGAATGTAAGGAAGTGTGTGGttttgg	mmu-miR-206-3p	TGGAATGTAAGGAAGTGTGTGG	3'	Yes	gp1a	((((.((.(..(((((..(((((((((((.(.(((((...........)))))).)))))))))))..)))))..).)).)))).	84	44.7	-35.8	599	614	1288	1453	626	1359	1094.27	596.367	1404.96	1208.06	511.996	1032.72	middle
161	278	mmu-miR-208b-3p	ATAAGACGAACAAAAGGTTTGT	22	chr14	-	54975681	54975792	acccccacctcctgctcctctcagggaagctttttgctcgcgttatgtttctcatccgaatATAAGACGAACAAAAGGTTTGTctgagggctgagtgctcccacctggggta	14	mmu-mir-208b,rno-mir-208b,hsa-mir-208b,ppy-mir-208b,mml-mir-208b,bta-mir-208b,eca-mir-208b,ptr-mir-208b,cja-mir-208b,cfa-mir-208b,ssc-mir-208b,dno-mir-208b,ocu-mir-208b,chi-mir-208b,	mmu-mir-208b	cctctcagggAAGCTTTTTGCTCGCGTTATGTttctcatccgaatATAAGACGAACAAAAGGTTTGTctgagggctg	mmu-miR-208b-3p	ATAAGACGAACAAAAGGTTTGT	3'	Yes	gp1a	(((((........(((((((((((..((((((((((.(((..((((((((.......))))))))..))).))))))))))..)))))))..))))..........))))).	83	51.8	-40.4	6	0	0	0	0	8	10.961	0	0	0	0	6.07931	middle
162	279	mmu-miR-210-5p	AGCCACTGCCCACCGCACACTG	22	chr7	-	141221384	141221493	ccggggcagtccctccaggctcaggacAGCCACTGCCCACCGCACACTGcgttgctccggacccaCTGTGCGTGTGACAGCGGCTGAtctgtccctgggcagcgcgaacc	17	mmu-mir-210,rno-mir-210,cpo-mir-210,cgr-mir-210,hsa-mir-210,bta-mir-210,ptr-mir-210,mml-mir-210,cfa-mir-210,efu-mir-210,ssc-mir-210,ggo-mir-210,dno-mir-210,tch-mir-210,ppa-mir-210,nle-mir-210,oga-mir-210,	mmu-mir-210	ccggggcagtccctccaggctcaggacAGCCACTGCCCACCGCACACTGcgttgctccggacccaCTGTGCGTGTGACAGCGGCTGAtctgtccctgggcagcgcgaacc	mmu-miR-210-5p	AGCCACTGCCCACCGCACACTG	5'	Yes	gp1a	..((((...)))).(((((..(((..(((((.(((..(((((((((.((.(((......))).)).)))))).))).))).)))))..)))..)))))............	84	69.1	-50	136	278	485	576	188	316	248.449	270.016	529.043	478.9	153.762	240.133	middle
162	280	mmu-miR-210-3p	CTGTGCGTGTGACAGCGGCTGA	22	chr7	-	141221384	141221493	ccggggcagtccctccaggctcaggacAGCCACTGCCCACCGCACACTGcgttgctccggacccaCTGTGCGTGTGACAGCGGCTGAtctgtccctgggcagcgcgaacc	17	mmu-mir-210,rno-mir-210,cpo-mir-210,cgr-mir-210,hsa-mir-210,bta-mir-210,ptr-mir-210,mml-mir-210,cfa-mir-210,efu-mir-210,ssc-mir-210,ggo-mir-210,dno-mir-210,tch-mir-210,ppa-mir-210,nle-mir-210,oga-mir-210,	mmu-mir-210	ccggggcagtccctccaggctcaggacAGCCACTGCCCACCGCACACTGcgttgctccggacccaCTGTGCGTGTGACAGCGGCTGAtctgtccctgggcagcgcgaacc	mmu-miR-210-3p	CTGTGCGTGTGACAGCGGCTGA	3'	Yes	gp1a	..((((...)))).(((((..(((..(((((.(((..(((((((((.((.(((......))).)).)))))).))).))).)))))..)))..)))))............	84	69.1	-50	2048	4402	7983	11156	3037	5212	3741.35	4275.58	8707.94	9275.37	2483.92	3960.67	high
163	281	mmu-miR-212-5p	ACCTTGGCTCTAGACTGCTTACT	23	chr11	+	75173372	75173482	cgggatatccccgcccgggcagcgcgccggcACCTTGGCTCTAGACTGCTTACTgcccgggccgccttcagTAACAGTCTCCAGTCACGGCCAccgacgcctggccccgcc	16	mmu-mir-212,rno-mir-212,cpo-mir-212,cfa-mir-212,pal-mir-212,ocu-mir-212,cgr-mir-212,hsa-mir-212,bta-mir-212,eca-mir-212,mdo-mir-212,mml-mir-212,ssc-mir-212,nle-mir-212,oga-mir-212,mmr-mir-212,	mmu-mir-212	gggcagcgcgccggcACCTTGGCTCTAGACTGCTTACTgcccgggccgccttcagTAACAGTCTCCAGTCACGGCCAccgacgcctggccc	mmu-miR-212-5p	ACCTTGGCTCTAGACTGCTTACT	5'	Yes	gp1a	((((.....))))...((((((.(((.(((..((.(((((..((((((.((((((...((....))..))))))))))))..))))).))...))).)))))).)))....	91	71.2	-47.7	44	100	61	318	191	147	80.3806	97.1281	66.5394	264.393	156.216	111.707	middle
163	282	mmu-miR-212-3p	TAACAGTCTCCAGTCACGGCCA	22	chr11	+	75173372	75173482	cgggatatccccgcccgggcagcgcgccggcACCTTGGCTCTAGACTGCTTACTgcccgggccgccttcagTAACAGTCTCCAGTCACGGCCAccgacgcctggccccgcc	16	mmu-mir-212,rno-mir-212,cpo-mir-212,cfa-mir-212,pal-mir-212,ocu-mir-212,cgr-mir-212,hsa-mir-212,bta-mir-212,eca-mir-212,mdo-mir-212,mml-mir-212,ssc-mir-212,nle-mir-212,oga-mir-212,mmr-mir-212,	mmu-mir-212	gggcagcgcgccggcACCTTGGCTCTAGACTGCTTACTgcccgggccgccttcagTAACAGTCTCCAGTCACGGCCAccgacgcctggccc	mmu-miR-212-3p	TAACAGTCTCCAGTCACGGCCA	3'	Yes	gp1a	((((.....))))...((((((.(((.(((..((.(((((..((((((.((((((...((....))..))))))))))))..))))).))...))).)))))).)))....	91	71.2	-47.7	52	42	93	193	254	176	94.9953	40.7938	101.445	160.465	207.743	133.745	middle
164	283	mmu-miR-214-5p	TGCCTGTCTACACTTGCTGTGC	22	chr1	+	162223368	162223479	ggcctggctggacagagttgtcatgtgtcTGCCTGTCTACACTTGCTGTGCagaacatccgctcacctgtACAGCAGGCACAGACAGGCAGTcacatgacaacccagcctga	42	mmu-mir-214,hsa-mir-214,ptr-mir-214,ppy-mir-214,mml-mir-214,ggo-mir-214,ppa-mir-214,mne-mir-214,age-mir-214,sla-mir-214,rno-mir-214,cpo-mir-214,pal-mir-214,dno-mir-214,ocu-mir-214,nle-mir-214,oga-mir-214,mmr-mir-214,dma-mir-214,cgr-mir-214,bta-mir-214,cfa-mir-214,ssc-mir-214,aja-mir-214,eca-mir-214,mdo-mir-214,cja-mir-214,efu-mir-214,chi-mir-214,sbo-mir-214,gga-mir-214,oni-mir-214-2,oni-mir-214-1…	mmu-mir-214	ggcctggctggacagagttgtcatgtgtcTGCCTGTCTACACTTGCTGTGCagaacatccgctcacctgtACAGCAGGCACAGACAGGCAGTcacatgacaacccagcct	mmu-miR-214-5p	TGCCTGTCTACACTTGCTGTGC	5'	Yes	gp1a	.....((((((.....(((((((((((.((((((((((...((((((((((((.............))))))))))))...)))))))))).)))))))))))))))))...	104	56.2	-67.6	680	1443	1504	1719	3509	2532	1242.25	1401.56	1640.58	1429.22	2869.96	1924.1	middle
164	284	mmu-miR-214-3p	ACAGCAGGCACAGACAGGCAGT	22	chr1	+	162223368	162223479	ggcctggctggacagagttgtcatgtgtcTGCCTGTCTACACTTGCTGTGCagaacatccgctcacctgtACAGCAGGCACAGACAGGCAGTcacatgacaacccagcctga	42	mmu-mir-214,hsa-mir-214,ptr-mir-214,ppy-mir-214,mml-mir-214,ggo-mir-214,ppa-mir-214,mne-mir-214,age-mir-214,sla-mir-214,rno-mir-214,cpo-mir-214,pal-mir-214,dno-mir-214,ocu-mir-214,nle-mir-214,oga-mir-214,mmr-mir-214,dma-mir-214,cgr-mir-214,bta-mir-214,cfa-mir-214,ssc-mir-214,aja-mir-214,eca-mir-214,mdo-mir-214,cja-mir-214,efu-mir-214,chi-mir-214,sbo-mir-214,gga-mir-214,oni-mir-214-2,oni-mir-214-1…	mmu-mir-214	ggcctggctggacagagttgtcatgtgtcTGCCTGTCTACACTTGCTGTGCagaacatccgctcacctgtACAGCAGGCACAGACAGGCAGTcacatgacaacccagcct	mmu-miR-214-3p	ACAGCAGGCACAGACAGGCAGT	3'	Yes	gp1a	.....((((((.....(((((((((((.((((((((((...((((((((((((.............))))))))))))...)))))))))).)))))))))))))))))...	104	56.2	-67.6	44063	113029	132542	55626	95041	164196	80495.7	109783	144578	46248.8	77732.7	124775	high
165	285	mmu-miR-215-5p_R+1	ATGACCTATGATTTGACAGACC	22	chr1	+	185313581	185313692	agctctcagcatcaacggtgtacaggagaATGACCTATGATTTGACAGACCgtgcagctgtgtatgTCTGTCATTCTGTAGGCCAATAttctgtatgtcactgctacttaaa	2	mmu-mir-215,cgr-mir-215,	mmu-mir-215	agctctcagcatcaacggtgtacaggagaATGACCTATGATTTGACAGACcgtgcagctgtgtatgTCTGTCATTCTGTAGGCCAATattctgtatgtcactgctacttaaa	mmu-miR-215-5p	ATGACCTATGATTTGACAGAC	5'	Diff	gp1a	.......((((.....(..((((((((...((.(((((((..((((((((.(((((....))))))))))))).)).))))).))...))))))))..)..)))).......	98	43.8	-37.1	16	11	15	54	52	46	29.2293	10.6841	16.3622	44.8969	42.53	34.956	middle
165	286	mmu-miR-215-3p_R+1	TCTGTCATTCTGTAGGCCAATA	22	chr1	+	185313581	185313692	agctctcagcatcaacggtgtacaggagaATGACCTATGATTTGACAGACCgtgcagctgtgtatgTCTGTCATTCTGTAGGCCAATAttctgtatgtcactgctacttaaa	2	mmu-mir-215,cgr-mir-215,	mmu-mir-215	agctctcagcatcaacggtgtacaggagaATGACCTATGATTTGACAGACcgtgcagctgtgtatgTCTGTCATTCTGTAGGCCAATattctgtatgtcactgctacttaaa	mmu-miR-215-3p	TCTGTCATTCTGTAGGCCAAT	3'	Diff	gp1a	.......((((.....(..((((((((...((.(((((((..((((((((.(((((....))))))))))))).)).))))).))...))))))))..)..)))).......	98	43.8	-37.1	0	0	0	7	0	0	0	0	0	5.81997	0	0	low
166	287	mmu-miR-216b-5p	AAATCTCTGCAGGCAAATGTGA	22	chr11	+	28746185	28746286	tgcacattggcagactgggAAATCTCTGCAGGCAAATGTGAtgtcactgaagaaaccacacacttacctgtagagattcttcagtctgacaacatcaagcat	15	mmu-mir-216b,rno-mir-216b,cpo-mir-216b,cgr-mir-216b,hsa-mir-216b,bta-mir-216b,eca-mir-216b,chi-mir-216b,ptr-mir-216b,ppy-mir-216b,mml-mir-216b,cfa-mir-216b,pal-mir-216b,dno-mir-216b,ocu-mir-216b,	mmu-mir-216b	ttggcagactgggAAATCTCTGCAGGCAAATGTGAtgtcactgaagaaaccacACACTTACCTGTAGAGATTCTTcagtctgacaa	mmu-miR-216b-5p	AAATCTCTGCAGGCAAATGTGA	5'	Yes	gp1a	(((...(((.((((((((..((((((((((((.((.((((...((......)).....)))).)).))))))))))))..)))))))).)))......))).	101	44.1	-39.3	0	0	5	6	0	0	0	0	5.45405	4.98855	0	0	low
167	288	mmu-miR-217-5p_1ss19CT	TACTGCATCAGGAACTGATTGGA	23	chr11	+	28763728	28763835	aaacatagtcattacagtttttgatgttgcagaTACTGCATCAGGAACTGACTGGAtaagacttaatccccatcagttcctaatgcattgccttcagcatctaaacaa	10	mmu-mir-217,rno-mir-217,cpo-mir-217,mdo-mir-217,cja-mir-217,cfa-mir-217,ssc-mir-217-1,ocu-mir-217,cli-mir-217,tgu-mir-217,	mmu-mir-217	aaacatagtcattacagtttttgatgttgcagaTACTGCATCAGGAACTGACTGGAtaagacttaatcccCATCAGTTCCTAATGCATTGCCTtcagcatctaaacaa	mmu-miR-217-5p	TACTGCATCAGGAACTGACTGGA	5'	Diff	gp1a	................((((..(((((((.((..(.(((((.(((((((((..((((........))))...))))))))).))))).)..)).))))))).))))..	90	38	-36.7	32	37	25	29	31	19	58.4586	35.9374	27.2703	24.1113	25.3544	14.4384	middle
168	289	mmu-miR-218-5p_R+1	TTGTGCTTGATCTAACCATGTG	22	chr11	+	35616816	35616925	gaccagttgccgcggggctttcctTTGTGCTTGATCTAACCATGTGgtggaacgatggaaacggaaCATGGTTCTGTCAAGCACCGCGGaaagcatcgctctctcctgca	25	mmu-mir-218-2,rno-mir-218a-2,cpo-mir-218-2,cfa-mir-218-2,pal-mir-218-2,dno-mir-218-2,ocu-mir-218-2,nle-mir-218-2,mmr-mir-218b,cgr-mir-218a,hsa-mir-218-2,ptr-mir-218-2,mml-mir-218-2,ppa-mir-218-2,mne-mir-218-2,lla-mir-218-2,bta-mir-218-2,oar-mir-218a,eca-mir-218-2,mdo-mir-218-2,ppy-mir-218-2,efu-mir-218b,ssc-mir-218b,chi-mir-218,sla-mir-218-2,	mmu-mir-218-2	gaccagttgccgcggggctttcctTTGTGCTTGATCTAACCATGTggtggaacgatggaaacggaaCATGGTTCTGTCAAGCACCGCGgaaagcatcgctctctcctgca	mmu-miR-218-5p	TTGTGCTTGATCTAACCATGT	5'	Diff	gp1a	...(((.....(((..(((((((...(((((((((..((((((((..........((....))..))))))))..)))))))))...)))))))..)))......)))..	105	54.5	-43.8	186.5	777	373	509.5	631	722.5	340.704	754.685	406.872	423.611	516.086	549.038	middle
168	290	mmu-miR-218-2-3p_R+1	CATGGTTCTGTCAAGCACCGCGA	23	chr11	+	35616816	35616925	gaccagttgccgcggggctttcctTTGTGCTTGATCTAACCATGTGgtggaacgatggaaacggaaCATGGTTCTGTCAAGCACCGCGGaaagcatcgctctctcctgca	25	mmu-mir-218-2,rno-mir-218a-2,cpo-mir-218-2,cfa-mir-218-2,pal-mir-218-2,dno-mir-218-2,ocu-mir-218-2,nle-mir-218-2,mmr-mir-218b,cgr-mir-218a,hsa-mir-218-2,ptr-mir-218-2,mml-mir-218-2,ppa-mir-218-2,mne-mir-218-2,lla-mir-218-2,bta-mir-218-2,oar-mir-218a,eca-mir-218-2,mdo-mir-218-2,ppy-mir-218-2,efu-mir-218b,ssc-mir-218b,chi-mir-218,sla-mir-218-2,	mmu-mir-218-2	gaccagttgccgcggggctttcctTTGTGCTTGATCTAACCATGTggtggaacgatggaaacggaaCATGGTTCTGTCAAGCACCGCGgaaagcatcgctctctcctgca	mmu-miR-218-2-3p	CATGGTTCTGTCAAGCACCGCG	3'	Diff	gp1a	...(((.....(((..(((((((...(((((((((..((((((((..........((....))..))))))))..)))))))))...)))))))..)))......)))..	105	54.5	-43.8	0	0	0	12	11	10	0	0	0	9.97709	8.99674	7.59914	low
169	291	mmu-miR-218-5p_R+1	TTGTGCTTGATCTAACCATGTG	22	chr5	+	48223923	48224072	tggcctagtggttggtgtagtgataatggagcgagattttctgTTGTGCTTGATCTAACCATGTGcttgcgaggtatgagaaAAACATGGTTCCGTCAAGCACCatggaacgtcacgcagctttctacagcatggcaagctgctgaggct	33	mmu-mir-218-1,rno-mir-218a-1,cpo-mir-218-1,ocu-mir-218-1,tch-mir-218-2,tch-mir-218-1,nle-mir-218-1,hsa-mir-218-1,ptr-mir-218-1,ppy-mir-218-1,ggo-mir-218,ppa-mir-218-1,age-mir-218,lla-mir-218-1,sla-mir-218-1,bta-mir-218-1,mdo-mir-218-1,mml-mir-218-1,cja-mir-218,cfa-mir-218-1,dno-mir-218-1,mmr-mir-218a,efu-mir-218a,ssc-mir-218-1,ssc-mir-218-2,pal-mir-218-1,mne-mir-218-1,lca-mir-218,gga-mir-218-1,ac…	mmu-mir-218-1	gtgataatggagcgagattttctgTTGTGCTTGATCTAACCATGTgcttgcgaggtatgagaaAAACATGGTTCCGTCAAGCACCatggaacgtcacgcagctttctaca	mmu-miR-218-5p	TTGTGCTTGATCTAACCATGT	5'	Diff	gp1a	.(((((((..(((..((..(((....(((((((.((..(((..(.(((((((((..((((((((....................))))))))..))))))))).)..)))..)).))).....))))...)))..)))))..)).)))))	149	48.7	-52.8	186.5	777	373	509.5	631	722.5	340.704	754.685	406.872	423.611	516.086	549.038	middle
169	292	mmu-miR-218-1-3p	AAACATGGTTCCGTCAAGCACC	22	chr5	+	48223923	48224072	tggcctagtggttggtgtagtgataatggagcgagattttctgTTGTGCTTGATCTAACCATGTGcttgcgaggtatgagaaAAACATGGTTCCGTCAAGCACCatggaacgtcacgcagctttctacagcatggcaagctgctgaggct	33	mmu-mir-218-1,rno-mir-218a-1,cpo-mir-218-1,ocu-mir-218-1,tch-mir-218-2,tch-mir-218-1,nle-mir-218-1,hsa-mir-218-1,ptr-mir-218-1,ppy-mir-218-1,ggo-mir-218,ppa-mir-218-1,age-mir-218,lla-mir-218-1,sla-mir-218-1,bta-mir-218-1,mdo-mir-218-1,mml-mir-218-1,cja-mir-218,cfa-mir-218-1,dno-mir-218-1,mmr-mir-218a,efu-mir-218a,ssc-mir-218-1,ssc-mir-218-2,pal-mir-218-1,mne-mir-218-1,lca-mir-218,gga-mir-218-1,ac…	mmu-mir-218-1	gtgataatggagcgagattttctgTTGTGCTTGATCTAACCATGTgcttgcgaggtatgagaaAAACATGGTTCCGTCAAGCACCatggaacgtcacgcagctttctaca	mmu-miR-218-1-3p	AAACATGGTTCCGTCAAGCACC	3'	Yes	gp1a	.(((((((..(((..((..(((....(((((((.((..(((..(.(((((((((..((((((((....................))))))))..))))))))).)..)))..)).))).....))))...)))..)))))..)).)))))	149	48.7	-52.8	9	55	75	48	73	88	16.4415	53.4205	81.8108	39.9084	59.7056	66.8724	middle
170	293	mmu-miR-219b-5p_L-1	GATGTCCAGCCACAATTCTCG	21	chr2	+	29845632	29845728	ccggagctcaaccacaGATGTCCAGCCACAATTCTCGgttggccgcagactcgtacaAGAATTGCGTTTGGACAATCAGTggcgaagcccctgagtt	5	mmu-mir-219b,rno-mir-219b,cgr-mir-219b,hsa-mir-219b,bta-mir-219b,	mmu-mir-219b	AGATGTCCAGCCACAATTCTCGgttggccgcagactcgtacaAGAATTGCGTTTGGACAATCAGT	mmu-miR-219b-5p	AGATGTCCAGCCACAATTCTCG	5'	Diff	gp1a	..((.(((...((((.(((((((((...((((((((((....)))............)))))))...))))))).)).))))...))).))......	89	54.6	-29.6	0	0	7	0	0	0	0	0	7.63567	0	0	0	low
170	294	mmu-miR-219b-3p	AGAATTGCGTTTGGACAATCAGT	23	chr2	+	29845632	29845728	ccggagctcaaccacaGATGTCCAGCCACAATTCTCGgttggccgcagactcgtacaAGAATTGCGTTTGGACAATCAGTggcgaagcccctgagtt	5	mmu-mir-219b,rno-mir-219b,cgr-mir-219b,hsa-mir-219b,bta-mir-219b,	mmu-mir-219b	AGATGTCCAGCCACAATTCTCGgttggccgcagactcgtacaAGAATTGCGTTTGGACAATCAGT	mmu-miR-219b-3p	AGAATTGCGTTTGGACAATCAGT	3'	Yes	gp1a	..((.(((...((((.(((((((((...((((((((((....)))............)))))))...))))))).)).))))...))).))......	89	54.6	-29.6	0	0	6	0	0	0	0	0	6.54486	0	0	0	low
171	295	mmu-mir-219a-1-p5	CGTCCCGGGCCGCGGCTCC	19	chr17	-	34024983	34025092	cCGTCCCGGGCCGCGGCTCCtgattgtccaaacgcaattctcgagtctctggctccggccgAGAGTTGCGTCTGGACGTCCCGagccgccgcccccaaacctcgaggggg	16	mmu-mir-219a-1,rno-mir-219a-1,hsa-mir-219a-1,ggo-mir-219,bta-mir-219-2,eca-mir-219-1,ptr-mir-219-1,ppy-mir-219-1,mml-mir-219-1,cfa-mir-219-1,efu-mir-219,ssc-mir-219a,pal-mir-219a-1,dno-mir-219a,ocu-mir-219a,tch-mir-219,	mmu-mir-219a-1	ccgtcccgggccgcggctccTGATTGTCCAAACGCAATTCTcgagtctctggctccggccgAGAGTTGCGTCTGGACGTCCCGagccgccgcccccaaacctcgaggggg	mmu-mir-219a-1-p5	cgtcccgggccgcggctcc	5'	New	gp1a	.......((((.(((((((..((.((((((.((((((((((((.(((.........))))))))))))))).))))))))..))))))).)))).....(((....))).	87	69.1	-59.8	0	2.5	17	19	0	6	0	2.4282	18.5438	15.7971	0	4.55948	middle
171	296	mmu-miR-219a-1-3p	AGAGTTGCGTCTGGACGTCCCG	22	chr17	-	34024983	34025092	cCGTCCCGGGCCGCGGCTCCtgattgtccaaacgcaattctcgagtctctggctccggccgAGAGTTGCGTCTGGACGTCCCGagccgccgcccccaaacctcgaggggg	16	mmu-mir-219a-1,rno-mir-219a-1,hsa-mir-219a-1,ggo-mir-219,bta-mir-219-2,eca-mir-219-1,ptr-mir-219-1,ppy-mir-219-1,mml-mir-219-1,cfa-mir-219-1,efu-mir-219,ssc-mir-219a,pal-mir-219a-1,dno-mir-219a,ocu-mir-219a,tch-mir-219,	mmu-mir-219a-1	ccgtcccgggccgcggctccTGATTGTCCAAACGCAATTCTcgagtctctggctccggccgAGAGTTGCGTCTGGACGTCCCGagccgccgcccccaaacctcgaggggg	mmu-miR-219a-1-3p	AGAGTTGCGTCTGGACGTCCCG	3'	Yes	gp1a	.......((((.(((((((..((.((((((.((((((((((((.(((.........))))))))))))))).))))))))..))))))).)))).....(((....))).	87	69.1	-59.8	6	15	9	20	42	32	10.961	14.5692	9.81729	16.6285	34.3512	24.3173	middle
172	297	mmu-miR-219c-5p	GGACGTCCAGACGCAACTCTCG	22	chr17	+	34025012	34025071	GGACGTCCAGACGCAACTCTCGgccggagccagagactcgagaattgcgtttggacaatc	1	mmu-mir-219c,	mmu-mir-219c	GGACGTCCAGACGCAACTCTCGgccggagccagagactCGAGAATTGCGTTTGGACAATC	mmu-miR-219c-5p	GGACGTCCAGACGCAACTCTCG	5'	Yes	gp1a	....((((((((((((.(((((((....)))........)))).))))))))))))....	52	58.3	-27.2	0	0	0	16	0	0	0	0	0	13.3028	0	0	middle
173	298	mmu-miR-219a-5p	TGATTGTCCAAACGCAATTCT	21	chr2	-	29845630	29845735	ggccctgaactcaggggcttcgccacTGATTGTCCAAACGCAATTCTtgtacgagtctgcggccaaccgagaattgtggctggacatctgtggttgagctccgggc	17	mmu-mir-219a-2,rno-mir-219a-2,cpo-mir-219b,cfa-mir-219-2,pal-mir-219a-2,ocu-mir-219b,hsa-mir-219a-2,eca-mir-219-2,ppy-mir-219-2,mml-mir-219-2,bta-mir-219-1,ptr-mir-219-2,mdo-mir-219-1,cja-mir-219,ssc-mir-219b,dno-mir-219b,chi-mir-219,	mmu-mir-219a-2	actcaggggcttcgccacTGATTGTCCAAACGCAATTCTtgtacgagtctgcggccaaccgAGAATTGTGGCTGGACATCTGTggttgagctccggg	mmu-miR-219a-5p	TGATTGTCCAAACGCAATTCT	5'	Yes	gp1a	.((((........(((((((..((((.((.((((((..(((((((((((.....((.....))....)))))))))))..)))))))).))))..)))))))))))	105	57.5	-50.1	0	2.5	0	0	0	0	0	2.4282	0	0	0	0	low
174	299	mmu-miR-221-5p	ACCTGGCATACAATGTAGATTTCTGT	26	chrX	-	19146286	19146393	tgaacatccaggtctggggcatgaACCTGGCATACAATGTAGATTTCTGTgtttgttaggcaacAGCTACATTGTCTGCTGGGTTTcaggctacctggaatcatttct	35	mmu-mir-221,rno-mir-221,cpo-mir-221,cgr-mir-221,hsa-mir-221,ppy-mir-221,mml-mir-221,ggo-mir-221,ppa-mir-221,bta-mir-221,chi-mir-221,oar-mir-221,eca-mir-221,ptr-mir-221,mdo-mir-221,cfa-mir-221,efu-mir-221,ssc-mir-221,pal-mir-221,dno-mir-221,ocu-mir-221,tch-mir-221,nle-mir-221,oga-mir-221,mmr-mir-221,dma-mir-221,sbo-mir-221,gga-mir-221,oni-mir-221-1,aca-mir-221,cli-mir-221,tgu-mir-221,xla-mir-221,t…	mmu-mir-221	atccaggtctggggcatgaACCTGGCATACAATGTAGATTTCTGTgtttgttaggcaacAGCTACATTGTCTGCTGGGTTTCaggctacctggaa	mmu-miR-221-5p	ACCTGGCATACAATGTAGATTTCTGT	5'	Yes	gp1a	(((...(((((((....(((.((((((..(((.(((((((((....((((((.......)).))))))))))))).)))..)))).)).)))))))))).))).....	103	45.4	-43.1	750	993	624	1165	1632	1472	1370.12	964.482	680.666	968.609	1334.79	1118.59	middle
174	300	mmu-miR-221-3p_R-1	AGCTACATTGTCTGCTGGGTTT	22	chrX	-	19146286	19146393	tgaacatccaggtctggggcatgaACCTGGCATACAATGTAGATTTCTGTgtttgttaggcaacAGCTACATTGTCTGCTGGGTTTcaggctacctggaatcatttct	35	mmu-mir-221,rno-mir-221,cpo-mir-221,cgr-mir-221,hsa-mir-221,ppy-mir-221,mml-mir-221,ggo-mir-221,ppa-mir-221,bta-mir-221,chi-mir-221,oar-mir-221,eca-mir-221,ptr-mir-221,mdo-mir-221,cfa-mir-221,efu-mir-221,ssc-mir-221,pal-mir-221,dno-mir-221,ocu-mir-221,tch-mir-221,nle-mir-221,oga-mir-221,mmr-mir-221,dma-mir-221,sbo-mir-221,gga-mir-221,oni-mir-221-1,aca-mir-221,cli-mir-221,tgu-mir-221,xla-mir-221,t…	mmu-mir-221	atccaggtctggggcatgaACCTGGCATACAATGTAGATTTCTGTgtttgttaggcaacAGCTACATTGTCTGCTGGGTTTCaggctacctggaa	mmu-miR-221-3p	AGCTACATTGTCTGCTGGGTTTC	3'	Diff	gp1a	(((...(((((((....(((.((((((..(((.(((((((((....((((((.......)).))))))))))))).)))..)))).)).)))))))))).))).....	103	45.4	-43.1	25490	31765	32918	79877	80783	68485	46566	30852.7	35907.3	66411.7	66071.2	52042.7	high
175	301	mmu-miR-222-5p_L-1R+2	TCAGTAGCCAGTGTAGATCCTG	22	chrX	-	19146882	19146984	aaggattagggtgccctcagtggcTCAGTAGCCAGTGTAGATCCTGtctttggtaatcagcAGCTACATCTGGCTACTGGGTCTCTggtggcatcatctagct	21	mmu-mir-222,rno-mir-222,cpo-mir-222,dno-mir-222,cgr-mir-222,cfa-mir-222,ssc-mir-222,pal-mir-222,ocu-mir-222,tch-mir-222,ppa-mir-222,nle-mir-222,oga-mir-222,mmr-mir-222,dma-mir-222,oni-mir-222-2,gmo-mir-222-2,xtr-mir-222,xla-mir-222,tni-mir-222,fru-mir-222,	mmu-mir-222	ccctcagtggCTCAGTAGCCAGTGTAGATCCtgtctttggtaatcagcAGCTACATCTGGCTACTGGGTCTctggtggc	mmu-miR-222-5p	CTCAGTAGCCAGTGTAGATCC	5'	Diff	gp1a	..((((...((((((..(((.(((((((((((((((((((...(((...........)))...))))).)))))))))))))).)))..))))))))))....	97	51.5	-51.5	34	27	9	136	104	83	62.1123	26.2246	9.81729	113.074	85.0601	63.0729	middle
175	302	mmu-miR-222-3p_R+2	AGCTACATCTGGCTACTGGGTCTCT	25	chrX	-	19146882	19146984	aaggattagggtgccctcagtggcTCAGTAGCCAGTGTAGATCCTGtctttggtaatcagcAGCTACATCTGGCTACTGGGTCTCTggtggcatcatctagct	21	mmu-mir-222,rno-mir-222,cpo-mir-222,dno-mir-222,cgr-mir-222,cfa-mir-222,ssc-mir-222,pal-mir-222,ocu-mir-222,tch-mir-222,ppa-mir-222,nle-mir-222,oga-mir-222,mmr-mir-222,dma-mir-222,oni-mir-222-2,gmo-mir-222-2,xtr-mir-222,xla-mir-222,tni-mir-222,fru-mir-222,	mmu-mir-222	ccctcagtggCTCAGTAGCCAGTGTAGATCCtgtctttggtaatcagcAGCTACATCTGGCTACTGGGTCTctggtggc	mmu-miR-222-3p	AGCTACATCTGGCTACTGGGTCT	3'	Diff	gp1a	..((((...((((((..(((.(((((((((((((((((((...(((...........)))...))))).)))))))))))))).)))..))))))))))....	97	51.5	-51.5	7535	9102	10443	21814	27064	21406	13765.2	8840.6	11391.3	18136.7	22135.3	16266.7	high
176	303	mmu-miR-223-5p_R+1	CGTGTATTTGACAAGCTGAGTTGG	24	chrX	+	96242817	96242926	tctggccatctgcagtgtcacgctcCGTGTATTTGACAAGCTGAGTTGGacactctgtgtggtagagTGTCAGTTTGTCAAATACCCCAAgtgtggctcatgcctatcag	15	mmu-mir-223,rno-mir-223,cpo-mir-223,hsa-mir-223,ptr-mir-223,ggo-mir-223,ppa-mir-223,eca-mir-223,ppy-mir-223,cfa-mir-223,efu-mir-223,ssc-mir-223,dno-mir-223,ocu-mir-223,tgu-mir-223,	mmu-mir-223	tctggccatctgcagtgtcacgctcCGTGTATTTGACAAGCTGAGTTGgacactctgtgtggtagagTGTCAGTTTGTCAAATACCCCAagtgtggctcatgcctatcag	mmu-miR-223-5p	CGTGTATTTGACAAGCTGAGTTG	5'	Diff	gp1a	.((((......(((..((((((((....((((((((((((((......(((((((((.....)))))))))))))))))))))))....))))))))...)))...))))	109	50	-44.5	875	1340	655	1359	793	917	1598.48	1301.52	714.481	1129.91	648.583	696.841	middle
176	304	mmu-miR-223-3p_R+1	TGTCAGTTTGTCAAATACCCCAT	23	chrX	+	96242817	96242926	tctggccatctgcagtgtcacgctcCGTGTATTTGACAAGCTGAGTTGGacactctgtgtggtagagTGTCAGTTTGTCAAATACCCCAAgtgtggctcatgcctatcag	15	mmu-mir-223,rno-mir-223,cpo-mir-223,hsa-mir-223,ptr-mir-223,ggo-mir-223,ppa-mir-223,eca-mir-223,ppy-mir-223,cfa-mir-223,efu-mir-223,ssc-mir-223,dno-mir-223,ocu-mir-223,tgu-mir-223,	mmu-mir-223	tctggccatctgcagtgtcacgctcCGTGTATTTGACAAGCTGAGTTGgacactctgtgtggtagagTGTCAGTTTGTCAAATACCCCAagtgtggctcatgcctatcag	mmu-miR-223-3p	TGTCAGTTTGTCAAATACCCCA	3'	Diff	gp1a	.((((......(((..((((((((....((((((((((((((......(((((((((.....)))))))))))))))))))))))....))))))))...)))...))))	109	50	-44.5	11060	15806	12704	11325	19232	17202	20204.8	15352.1	13857.7	9415.88	15729.6	13072	high
177	305	mmu-miR-224-5p_R+1	TAAGTCACTAGTGGTTCCGTTT	22	chrX	-	72261022	72261121	aaggcccgggggctttTAAGTCACTAGTGGTTCCGTTTagtagatggtttgtgcattgtttcaaAATGGTGCCCTAGTGACTACAAagccccagagccag	19	mmu-mir-224,rno-mir-224,cpo-mir-224,hsa-mir-224,ptr-mir-224,ppy-mir-224,mml-mir-224,ggo-mir-224,ppa-mir-224,mne-mir-224,bta-mir-224,chi-mir-224,eca-mir-224,cja-mir-224,cfa-mir-224,ssc-mir-224,ocu-mir-224,nle-mir-224,oga-mir-224,	mmu-mir-224	gggctttTAAGTCACTAGTGGTTCCGTTtagtagatggtttgtgcattgtttcaAAATGGTGCCCTAGTGACTACAaagccc	mmu-miR-224-5p	TAAGTCACTAGTGGTTCCGTT	5'	Diff	gp1a	..(((...((((((((..(((((((((.((..((((((...(((..((......))..)))..))))))..)))))))))))..))))))))...)))..	96	49	-46.2	585	1247	414	1536	1138	725	1068.7	1211.19	451.595	1277.07	930.754	550.938	middle
177	306	mmu-miR-224-3p_L-1R+1	AATGGTGCCCTAGTGACTACAA	22	chrX	-	72261022	72261121	aaggcccgggggctttTAAGTCACTAGTGGTTCCGTTTagtagatggtttgtgcattgtttcaaAATGGTGCCCTAGTGACTACAAagccccagagccag	19	mmu-mir-224,rno-mir-224,cpo-mir-224,hsa-mir-224,ptr-mir-224,ppy-mir-224,mml-mir-224,ggo-mir-224,ppa-mir-224,mne-mir-224,bta-mir-224,chi-mir-224,eca-mir-224,cja-mir-224,cfa-mir-224,ssc-mir-224,ocu-mir-224,nle-mir-224,oga-mir-224,	mmu-mir-224	gggctttTAAGTCACTAGTGGTTCCGTTtagtagatggtttgtgcattgtttcaAAATGGTGCCCTAGTGACTACAaagccc	mmu-miR-224-3p	AAATGGTGCCCTAGTGACTACA	3'	Diff	gp1a	..(((...((((((((..(((((((((.((..((((((...(((..((......))..)))..))))))..)))))))))))..))))))))...)))..	96	49	-46.2	0	7	6	18	7	6	0	6.79897	6.54486	14.9656	5.7252	4.55948	middle
178	307	mmu-miR-290a-5p	ACTCAAACTATGGGGGCACTTT	22	chr7	+	3218626	3218708	ctcatcttgcggtACTCAAACTATGGGGGCACTTTtttttttctttaaaaagtgccgcctagttttaagccccgccggttgag	1	mmu-mir-290a,	mmu-mir-290a	ctcatcttgcggtACTCAAACTATGGGGGCACTTTtttttttctttaaAAAGTGCCGCCTAGTTTTAAGCCCcgccggttgag	mmu-miR-290a-5p	ACTCAAACTATGGGGGCACTTT	5'	Yes	gp1a	((((.(..((((..((.((((((.((.((((((((((.........)))))))))).))))))))..))..))))..).))))	83	45.8	-35	0	7	0	5	0	0	0	6.79897	0	4.15712	0	0	low
179	308	mmu-miR-293-3p	AGTGCCGCAGAGTTTGTAGTGT	22	chr7	+	3220343	3220422	ttcaatctgtggtactcaaactgtgtgacattttgttctttgtaagaAGTGCCGCAGAGTTTGTAGTGTtgccgattgag	1	mmu-mir-293,	mmu-mir-293	ttcaatctgtggtACTCAAACTGTGTGACATTTTGttctttgtaagaAGTGCCGCAGAGTTTGTAGTGTtgccgattgag	mmu-miR-293-3p	AGTGCCGCAGAGTTTGTAGTGT	3'	Yes	gp1a	.((((((.((..((((((((((.((((.((((((...........)))))).)))).)))))).))))..)).)))))).	78	41.2	-31.1	5	5	9	12	0	5	9.13416	4.85641	9.81729	9.97709	0	3.79957	low
180	309	mmu-miR-295-3p	AAAGTGCTACTACTTTTGAGTCT	23	chr7	+	3220773	3220841	ggtgagactcaaatgtggggcacacttctggactgtacatagAAAGTGCTACTACTTTTGAGTCTctcc	1	mmu-mir-295,	mmu-mir-295	ggtgagACTCAAATGTGGGGCACACTTCtggactgtacatagAAAGTGCTACTACTTTTGAGTCTctcc	mmu-miR-295-3p	AAAGTGCTACTACTTTTGAGTCT	3'	Yes	gp1a	((.((((((((((.(((((((((..(((((.........))))).))))).)))).)))))))))).))	69	46.4	-30.7	0	5	0	0	0	0	0	4.85641	0	0	0	0	low
181	310	mmu-miR-296-5p	AGGGCCCCCCCTCAATCCTGT	21	chr2	-	174267047	174267125	gggcctttctggAGGGCCCCCCCTCAATCCTGTtgtgctcgcttcaGAGGGTTGGGTGGAGGCTCTCCtgaaggtgtcc	5	mmu-mir-296,rno-mir-296,cpo-mir-296,cgr-mir-296,tch-mir-296,	mmu-mir-296	gggcctttctggAGGGCCCCCCCTCAATCCTGTtgtgctcgcttcaGAGGGTTGGGTGGAGGCTCTCCtgaaggtgtcc	mmu-miR-296-5p	AGGGCCCCCCCTCAATCCTGT	5'	Yes	gp1a	(((((((((.((((((((.((.(((((((((.(((.........)))))))))))).)).)))))))).))))).))))	79	63.3	-43.2	325	555	772	681	946	656	593.721	539.061	842.105	566.2	773.72	498.504	middle
181	311	mmu-miR-296-3p	GAGGGTTGGGTGGAGGCTCTCC	22	chr2	-	174267047	174267125	gggcctttctggAGGGCCCCCCCTCAATCCTGTtgtgctcgcttcaGAGGGTTGGGTGGAGGCTCTCCtgaaggtgtcc	5	mmu-mir-296,rno-mir-296,cpo-mir-296,cgr-mir-296,tch-mir-296,	mmu-mir-296	gggcctttctggAGGGCCCCCCCTCAATCCTGTtgtgctcgcttcaGAGGGTTGGGTGGAGGCTCTCCtgaaggtgtcc	mmu-miR-296-3p	GAGGGTTGGGTGGAGGCTCTCC	3'	Yes	gp1a	(((((((((.((((((((.((.(((((((((.(((.........)))))))))))).)).)))))))).))))).))))	79	63.3	-43.2	226	544	490	635	456	293	412.864	528.377	534.497	527.954	372.956	222.655	middle
182	312	mmu-miR-297a-5p	ATGTATGTGTGCATGTGCATGT	22	chr7	-	10958437	10958512	atatgtatgtatgtATGTATGTGTGCATGTGCATGTgcatgtatgcatattgcatgtatatattatgcatacatgt	1	mmu-mir-297a-1,	mmu-mir-297a-1	atatgtatgtatgtATGTATGTGTGCATGTGCATGTgcatgtatgcatattgcatgtatatattatgcatacatgt	mmu-miR-297a-5p	ATGTATGTGTGCATGTGCATGT	5'	Yes	gp1a	(((((((((((((.(((((((..((((((((((((......)))))))).))))..))))))))))))))))))))	76	31.6	-35.9	2.25	0	4.5	1.5	0	3	4.11037	0	4.90865	1.24714	0	2.27974	low
183	313	mmu-miR-297a-3p_L+1R-1	ATATACATACACACATACCCAT	22	chr2	+	10509016	10509113	ctgtgtgtatatgtatgtgtgcatgtacatgtgtgtatatgaatatacATATACATACACACATACCCATacaaacatgcatacaaacacacaaaaat	1	mmu-mir-297c,	mmu-mir-297c	ctgtgtgtatATGTATGTGTGCATGTACATGTgtgtatatgaatatacaTATACATACACACATACCCATAcaaacatgcatacaaacacacaaaaat	mmu-miR-297a-3p	TATACATACACACATACCCATA	3'	Diff	gp1a	.(((((((...((((((..((..((((..((((((((((((......))))))))))))..........))))..))..)))))).))))))).....	92	31.6	-33.9	3.25	3	5.25	6.25	7	21.25	5.93721	2.91384	5.72675	5.1964	5.7252	16.1482	middle
184	314	mmu-mir-297a-3-p5	TGTGTGCATGTGCATGTGTGTAT	23	chr2	+	10515820	10515921	ctgtgtgtatatgtaTGTGTGCATGTGCATGTGTGTATatgaatatacATATACATACACACATACCCATacaaacatgcacacaaacacacagaaaattga	1	mmu-mir-297a-3,	mmu-mir-297a-3	ctgtgtgtatATGTATGTGTGCATGTGCATGTgtgtatatgaatatacaTATACATACACACATACCCATAcaaacatgcacacaaacacacagaaaattga	mmu-mir-297a-3-p5	TGTGTGCATGTGCATGTgtgtat	5'	New	gp1a	((((((((.......(((((((((((...((((((((((((......))))))))))))...............))))))))))).))))))))........	94	34.3	-38.2	2.95	0.5	6.4	2.1	0	4.44545	5.38916	0.485641	6.98119	1.74599	0	3.37816	low
184	315	mmu-miR-297a-3p_L+1R-1	ATATACATACACACATACCCAT	22	chr2	+	10515820	10515921	ctgtgtgtatatgtaTGTGTGCATGTGCATGTGTGTATatgaatatacATATACATACACACATACCCATacaaacatgcacacaaacacacagaaaattga	1	mmu-mir-297a-3,	mmu-mir-297a-3	ctgtgtgtatATGTATGTGTGCATGTGCATGTgtgtatatgaatatacaTATACATACACACATACCCATAcaaacatgcacacaaacacacagaaaattga	mmu-miR-297a-3p	TATACATACACACATACCCATA	3'	Diff	gp1a	((((((((.......(((((((((((...((((((((((((......))))))))))))...............))))))))))).))))))))........	94	34.3	-38.2	3.25	3	5.25	6.25	7	21.25	5.93721	2.91384	5.72675	5.1964	5.7252	16.1482	middle
185	316	mmu-mir-297a-4-p5	TGTGTGCATGTGCATGTGTGTAT	23	chr2	+	10517067	10517164	ctgtgtgtatatgtaTGTGTGCATGTGCATGTGTGTATatgagtatacATATACATACACACATACCCATacaagcatgcacacaaatacacgcaaaa	1	mmu-mir-297a-4,	mmu-mir-297a-4	ctgtgtgtatATGTATGTGTGCATGTGCATGTgtgtatatgagtatacaTATACATACACACATACCCATAcaagcatgcacacaaatacacgcaaaa	mmu-mir-297a-4-p5	TGTGTGCATGTGCATGTgtgtat	5'	New	gp1a	.(((((((((.(((.((..((((((((..((((((((((((......)))))))))))))))))..........)))..)).))).)))))))))...	94	36.7	-39.8	2.95	0.5	6.4	2.1	0	4.44545	5.38916	0.485641	6.98119	1.74599	0	3.37816	low
185	317	mmu-miR-297a-3p_L+1R-1	ATATACATACACACATACCCAT	22	chr2	+	10517067	10517164	ctgtgtgtatatgtaTGTGTGCATGTGCATGTGTGTATatgagtatacATATACATACACACATACCCATacaagcatgcacacaaatacacgcaaaa	1	mmu-mir-297a-4,	mmu-mir-297a-4	ctgtgtgtatATGTATGTGTGCATGTGCATGTgtgtatatgagtatacaTATACATACACACATACCCATAcaagcatgcacacaaatacacgcaaaa	mmu-miR-297a-3p	TATACATACACACATACCCATA	3'	Diff	gp1a	.(((((((((.(((.((..((((((((..((((((((((((......)))))))))))))))))..........)))..)).))).)))))))))...	94	36.7	-39.8	3.25	3	5.25	6.25	7	21.25	5.93721	2.91384	5.72675	5.1964	5.7252	16.1482	middle
186	318	mmu-mir-297a-2-p5	TGTGTGCATGTGCATGTGTGTAT	23	chr2	+	10472254	10472343	ctgtgtgtatatgtaTGTGTGCATGTGCATGTGTGTATatgagtatacATATACATACGCACATACCCATacaagcatgcacacaaaccc	1	mmu-mir-297a-2,	mmu-mir-297a-2	ctgtgtgtatATGTATGTGTGCATGTGCATGTgtgtatatgagtatacatatacatacgcacatacccatacaagcatgcacacaaaccc	mmu-mir-297a-2-p5	TGTGTGCATGTGCATGTgtgtat	5'	New	gp1a	.(((((((..(((..((((((.((((((..(((((((((((......)))))))))))))))))...))))))..)))))))))).....	84	40	-38.1	2.95	0.5	6.4	2.1	0	4.44545	5.38916	0.485641	6.98119	1.74599	0	3.37816	low
186	319	mmu-mir-297a-2-p3	ATATACATACGCACATACCCAT	22	chr2	+	10472254	10472343	ctgtgtgtatatgtaTGTGTGCATGTGCATGTGTGTATatgagtatacATATACATACGCACATACCCATacaagcatgcacacaaaccc	1	mmu-mir-297a-2,	mmu-mir-297a-2	ctgtgtgtatATGTATGTGTGCATGTGCATGTgtgtatatgagtatacatatacatacgcacatacccatacaagcatgcacacaaaccc	mmu-mir-297a-2-p3	atatacatacgcacatacccat	3'	New	gp1a	.(((((((..(((..((((((.((((((..(((((((((((......)))))))))))))))))...))))))..)))))))))).....	84	40	-38.1	7	0	0	0	0	0	12.7878	0	0	0	0	0	middle
187	320	mmu-miR-297b-5p	ATGTATGTGTGCATGAACATGT	22	chr2	+	10511667	10511775	tctatttgcttgtgtgtatATGTATGTGTGCATGAACATGTgtatatgaatatacATATACATACACACATACCCATacaaacatgcatacaaacacacagaaaatgga	1	mmu-mir-297b,	mmu-mir-297b	tctatttgcttgtgtgtatATGTATGTGTGCATGAACATGTgtatatgaatatacaTATACATACACACATACCCATAcaaacatgcatacaaacacacagaaaatgga	mmu-miR-297b-5p	ATGTATGTGTGCATGAACATGT	5'	Yes	gp1a	(((((((..((((((((.(((((((((.((.(((...((((((.((((.(((....))).)))).))))))...))).)).)))))))))...)))))))).)))))))	109	32.1	-36.9	5	11	9	8	7	5	9.13416	10.6841	9.81729	6.6514	5.7252	3.79957	middle
187	321	mmu-miR-297a-3p_L+1R-1	ATATACATACACACATACCCAT	22	chr2	+	10511667	10511775	tctatttgcttgtgtgtatATGTATGTGTGCATGAACATGTgtatatgaatatacATATACATACACACATACCCATacaaacatgcatacaaacacacagaaaatgga	1	mmu-mir-297b,	mmu-mir-297b	tctatttgcttgtgtgtatATGTATGTGTGCATGAACATGTgtatatgaatatacaTATACATACACACATACCCATAcaaacatgcatacaaacacacagaaaatgga	mmu-miR-297a-3p	TATACATACACACATACCCATA	3'	Diff	gp1a	(((((((..((((((((.(((((((((.((.(((...((((((.((((.(((....))).)))).))))))...))).)).)))))))))...)))))))).)))))))	109	32.1	-36.9	3.25	3	5.25	6.25	7	21.25	5.93721	2.91384	5.72675	5.1964	5.7252	16.1482	middle
188	322	mmu-miR-298-5p_R-2	GGCAGAGGAGGGCTGTTCTTC	21	chr2	-	174267504	174267585	ccaggcctttGGCAGAGGAGGGCTGTTCTTCccttgagttttatgactgggaggaactagccttctctcagcttaggagtgg	3	mmu-mir-298,rno-mir-298,cgr-mir-298,	mmu-mir-298	ccaggcctttGGCAGAGGAGGGCTGTTCTTCCCttgagttttatgactggGAGGAACTAGCCTTCTCTCAGCTTaggagtgg	mmu-miR-298-5p	GGCAGAGGAGGGCTGTTCTTCCC	5'	Diff	gp1a	(((..(((..(((.(((((((((((((((((((...((((....))))))))))))).))))))).))).))).)))..)))	82	53.7	-43	885	1388	1805	2977	1466	1530	1616.75	1348.14	1968.91	2475.15	1199.02	1162.67	middle
189	323	mmu-miR-299a-5p	TGGTTTACCGTCCCACATACAT	22	chr12	+	109710628	109710721	gcggtacttgaagaaaTGGTTTACCGTCCCACATACATtttgagtatgTATGTGGGACGGTAAACCGCTTcttggtatccagcccagccatcca	19	mmu-mir-299a,rno-mir-299a,cfa-mir-299,cpo-mir-299,hsa-mir-299,bta-mir-299,eca-mir-299,ptr-mir-299,ppy-mir-299,mml-mir-299,cja-mir-299,efu-mir-299,ssc-mir-299,ggo-mir-299,pal-mir-299a,ocu-mir-299,dno-mir-299,ppa-mir-299,oar-mir-299,	mmu-mir-299a	aagaaaTGGTTTACCGTCCCACATACATtttgagtatgTATGTGGGACGGTAAACCGCTTctt	mmu-miR-299a-5p	TGGTTTACCGTCCCACATACAT	5'	Yes	gp1a	((((((((..(((((..(((((((((((((((((((((.......)))))))))))))))))))))..))))))))).)).))...........	83	47.9	-48.7	148.5	438	453	633	1557	1156	271.285	425.421	494.137	526.292	1273.45	878.461	middle
189	324	mmu-miR-299a-3p	TATGTGGGACGGTAAACCGCTT	22	chr12	+	109710628	109710721	gcggtacttgaagaaaTGGTTTACCGTCCCACATACATtttgagtatgTATGTGGGACGGTAAACCGCTTcttggtatccagcccagccatcca	19	mmu-mir-299a,rno-mir-299a,cfa-mir-299,cpo-mir-299,hsa-mir-299,bta-mir-299,eca-mir-299,ptr-mir-299,ppy-mir-299,mml-mir-299,cja-mir-299,efu-mir-299,ssc-mir-299,ggo-mir-299,pal-mir-299a,ocu-mir-299,dno-mir-299,ppa-mir-299,oar-mir-299,	mmu-mir-299a	aagaaaTGGTTTACCGTCCCACATACATtttgagtatgTATGTGGGACGGTAAACCGCTTctt	mmu-miR-299a-3p	TATGTGGGACGGTAAACCGCTT	3'	Yes	gp1a	((((((((..(((((..(((((((((((((((((((((.......)))))))))))))))))))))..))))))))).)).))...........	83	47.9	-48.7	187	602	484	645	761	613	341.618	584.711	527.952	536.269	622.411	465.827	middle
190	325	mmu-miR-299b-5p_L+1R+1	TGGTTTACCGTCCCACATACATA	23	chr12	-	109710609	109710725	ggactggatggctgggctggataccaagaagCGGTTTACCGTCCCACATACATActcaaaatgTATGTGGGACGGTAAACCatttcttcaagtaccgcgtgacagcaaggacagctg	3	mmu-mir-299b,rno-mir-299b,pal-mir-299b,	mmu-mir-299b	GGTTTACCGTCCCACATACATactcaaaatgTATGTGGGACGGTAAACC	mmu-miR-299b-5p	GGTTTACCGTCCCACATACAT	5'	Diff	gp1a	((.(((....((((.(((((.(((.(((((..(((((((((((((((((((((.......)))))))))))))))))))))..)))))...)))))).))..)))).....))))).	116	50.4	-57.3	3.5	4	0	5	15	15	6.39391	3.88512	0	4.15712	12.2683	11.3987	middle
190	326	mmu-miR-299b-3p	TATGTGGGACGGTAAACC	18	chr12	-	109710609	109710725	ggactggatggctgggctggataccaagaagCGGTTTACCGTCCCACATACATActcaaaatgTATGTGGGACGGTAAACCatttcttcaagtaccgcgtgacagcaaggacagctg	3	mmu-mir-299b,rno-mir-299b,pal-mir-299b,	mmu-mir-299b	GGTTTACCGTCCCACATACATactcaaaatgTATGTGGGACGGTAAACC	mmu-miR-299b-3p	TATGTGGGACGGTAAACC	3'	Yes	gp1a	((.(((....((((.(((((.(((.(((((..(((((((((((((((((((((.......)))))))))))))))))))))..)))))...)))))).))..)))).....))))).	116	50.4	-57.3	0	3	0	3	0	0	0	2.91384	0	2.49427	0	0	low
191	327	mmu-miR-300-5p_L-1R+2	TGAAGAGAGGTTATCCTTTGTGT	23	chr12	+	109724305	109724394	tatcgtttgctactTGAAGAGAGGTTATCCTTTGTGTgtttgctttacgcgaaatgaaTATGCAAGGGCAAGCTCTCTTCgaggagcaaa	3	mmu-mir-300,rno-mir-300,cgr-mir-300,	mmu-mir-300	gctacTTGAAGAGAGGTTATCCTTTGTgtgtttgctttacgcgaaatgaaTATGCAAGGGCAAGCTCTCTTCgaggagc	mmu-miR-300-5p	TTGAAGAGAGGTTATCCTTTGT	5'	Diff	gp1a	.....((((((.(((((((((((.((..((((((..(((((..(((....)))..)))))..)))))).)).))))))))))).))))))	85	42.2	-39	0	0	11	0	15	45	0	0	11.9989	0	12.2683	34.1961	middle
191	328	mmu-miR-300-3p	TATGCAAGGGCAAGCTCTCTTC	22	chr12	+	109724305	109724394	tatcgtttgctactTGAAGAGAGGTTATCCTTTGTGTgtttgctttacgcgaaatgaaTATGCAAGGGCAAGCTCTCTTCgaggagcaaa	3	mmu-mir-300,rno-mir-300,cgr-mir-300,	mmu-mir-300	gctacTTGAAGAGAGGTTATCCTTTGTgtgtttgctttacgcgaaatgaaTATGCAAGGGCAAGCTCTCTTCgaggagc	mmu-miR-300-3p	TATGCAAGGGCAAGCTCTCTTC	3'	Yes	gp1a	.....((((((.(((((((((((.((..((((((..(((((..(((....)))..)))))..)))))).)).))))))))))).))))))	85	42.2	-39	634	1551	1138	1600	2533	2005	1158.21	1506.46	1241.34	1330.28	2071.7	1523.63	middle
192	329	mmu-miR-301a-5p	GCTCTGACTTTATTGCACTACT	22	chr11	+	87113004	87113089	cctgctaacggctGCTCTGACTTTATTGCACTACTgtactttacagcgagCAGTGCAATAGTATTGTCAAAGCatccgcgagcagg	26	mmu-mir-301a,rno-mir-301a,cpo-mir-301a,pal-mir-301a,dno-mir-301a,ocu-mir-301a,cgr-mir-301a,hsa-mir-301a,eca-mir-301a,mml-mir-301a,bta-mir-301a,ptr-mir-301a,mdo-mir-301,chi-mir-301a,ppy-mir-301a,cja-mir-301a,ggo-mir-301a,nle-mir-301a,oga-mir-301a,mmr-mir-301a,cfa-mir-301a,ssc-mir-301,tgu-mir-301,xtr-mir-301-1,xla-mir-301-2,xla-mir-301-1,	mmu-mir-301a	cctgctaacggctGCTCTGACTTTATTGCACTACTgtactttacagcgagCAGTGCAATAGTATTGTCAAAGCatccgcgagcagg	mmu-miR-301a-5p	GCTCTGACTTTATTGCACTACT	5'	Yes	gp1a	((((((..(((.((((.((((.((((((((((.(((((...))))).....))))))))))....)))).)))).)))..))))))	86	48.8	-38	42	44	41	53	50	41	76.727	42.7364	44.7232	44.0655	40.8943	31.1565	middle
192	330	mmu-miR-301a-3p	CAGTGCAATAGTATTGTCAAAGC	23	chr11	+	87113004	87113089	cctgctaacggctGCTCTGACTTTATTGCACTACTgtactttacagcgagCAGTGCAATAGTATTGTCAAAGCatccgcgagcagg	26	mmu-mir-301a,rno-mir-301a,cpo-mir-301a,pal-mir-301a,dno-mir-301a,ocu-mir-301a,cgr-mir-301a,hsa-mir-301a,eca-mir-301a,mml-mir-301a,bta-mir-301a,ptr-mir-301a,mdo-mir-301,chi-mir-301a,ppy-mir-301a,cja-mir-301a,ggo-mir-301a,nle-mir-301a,oga-mir-301a,mmr-mir-301a,cfa-mir-301a,ssc-mir-301,tgu-mir-301,xtr-mir-301-1,xla-mir-301-2,xla-mir-301-1,	mmu-mir-301a	cctgctaacggctGCTCTGACTTTATTGCACTACTgtactttacagcgagCAGTGCAATAGTATTGTCAAAGCatccgcgagcagg	mmu-miR-301a-3p	CAGTGCAATAGTATTGTCAAAGC	3'	Yes	gp1a	((((((..(((.((((.((((.((((((((((.(((((...))))).....))))))))))....)))).)))).)))..))))))	86	48.8	-38	173	329	287	271	249	389	316.042	319.551	313.063	225.316	203.653	295.607	middle
193	331	mmu-miR-301b-5p	GCTCTGACTAGGTTGCACTACT	22	chr16	-	17124400	17124496	tttcctgctggctgcgggtGCTCTGACTAGGTTGCACTACTgtgctgtgagaagCAGTGCAATGGTATTGTCAAAGCatctgggaccagcctcgaag	3	mmu-mir-301b,rno-mir-301b,cgr-mir-301b,	mmu-mir-301b	tttcctgctggctgcgggtGCTCTGACTAGGTTGCACTACTgtgctgtgagaagCAGTGCAATGGTATTGTCAAAGCatctgggaccagcctcgaag	mmu-miR-301b-5p	GCTCTGACTAGGTTGCACTACT	5'	Yes	gp1a	.(((..(((((((.((((((((.((((........((((.((..((((.....))))..)).))))...)))).)))))))))).)))))...))).	95	53.6	-38	0	5	0	0	5	0	0	4.85641	0	0	4.08943	0	low
193	332	mmu-miR-301b-3p	CAGTGCAATGGTATTGTCAAAGC	23	chr16	-	17124400	17124496	tttcctgctggctgcgggtGCTCTGACTAGGTTGCACTACTgtgctgtgagaagCAGTGCAATGGTATTGTCAAAGCatctgggaccagcctcgaag	3	mmu-mir-301b,rno-mir-301b,cgr-mir-301b,	mmu-mir-301b	tttcctgctggctgcgggtGCTCTGACTAGGTTGCACTACTgtgctgtgagaagCAGTGCAATGGTATTGTCAAAGCatctgggaccagcctcgaag	mmu-miR-301b-3p	CAGTGCAATGGTATTGTCAAAGC	3'	Yes	gp1a	.(((..(((((((.((((((((.((((........((((.((..((((.....))))..)).))))...)))).)))))))))).)))))...))).	95	53.6	-38	26	26	35	50	20	43	47.4976	25.2533	38.1784	41.5712	16.3577	32.6763	middle
194	333	mmu-miR-302c-5p_L-2R+2	TTTAACATGGGGTTACCTGCTG	22	chr3	+	127545363	127545430	cctctgcTTTAACATGGGGTTACCTGCTGtgttaaacaaaagcaagtgcttccatgtttcagtggggg	1	mmu-mir-302c,	mmu-mir-302c	cctctGCTTTAACATGGGGTTACCTGCtgtgttaaacaaaagcAAGTGCTTCCATGTTTCAGTGGggg	mmu-miR-302c-5p	GCTTTAACATGGGGTTACCTGC	5'	Diff	gp1a	((((..((..((((((((..(((.((((.((.....))..)))).)))..))))))))..))..))))	68	47.1	-27.6	5	10	8	11	0	0	9.13416	9.71281	8.72648	9.14567	0	0	low
195	334	mmu-miR-302b-5p	ACTTTAACATGGGAATGCTTTCT	23	chr3	+	127545225	127545305	tgggttcccttcaACTTTAACATGGGAATGCTTTCTgtctcatcgaagagTAAGTGCTTCCATGTTTTAGTAGaagtgaat	5	mmu-mir-302b,hsa-mir-302b,ptr-mir-302b,ppy-mir-302b,cja-mir-302b,	mmu-mir-302b	gttcccttcaACTTTAACATGGGAATGCTTTCTgtctcatcgaagagTAAGTGCTTCCATGTTTTAGTAGaagt	mmu-miR-302b-5p	ACTTTAACATGGGAATGCTTTCT	5'	Yes	gp1a	...((((.((((.(((..(((((((((..((((.((.((.....))..)).))))..)))))))))..))).)))).))))	78	39.5	-27.4	5	0	0	0	0	0	9.13416	0	0	0	0	0	low
195	335	mmu-miR-302b-3p	TAAGTGCTTCCATGTTTTAGTAG	23	chr3	+	127545225	127545305	tgggttcccttcaACTTTAACATGGGAATGCTTTCTgtctcatcgaagagTAAGTGCTTCCATGTTTTAGTAGaagtgaat	5	mmu-mir-302b,hsa-mir-302b,ptr-mir-302b,ppy-mir-302b,cja-mir-302b,	mmu-mir-302b	gttcccttcaACTTTAACATGGGAATGCTTTCTgtctcatcgaagagTAAGTGCTTCCATGTTTTAGTAGaagt	mmu-miR-302b-3p	TAAGTGCTTCCATGTTTTAGTAG	3'	Yes	gp1a	...((((.((((.(((..(((((((((..((((.((.((.....))..)).))))..)))))))))..))).)))).))))	78	39.5	-27.4	5	0	0	0	0	0	9.13416	0	0	0	0	0	low
196	336	mmu-mir-320-p5_1ss4TG	CGGGTCTTCCCGGAGTCGGG	20	chr14	+	70443510	70443591	gcctcgccgccctccgccttctcttccCGGTTCTTCCCGGAGTCGGGAAAAGCTGGGTTGAGAGGGCGAaaaaggatgtggg	19	mmu-mir-320,rno-mir-320,cgr-mir-320a,hsa-mir-320a,ptr-mir-320a,ppy-mir-320a,mml-mir-320a,cja-mir-320-1,cfa-mir-320,pal-mir-320,ppa-mir-320a,nle-mir-320a,oga-mir-320a,mmr-mir-320a-4,mmr-mir-320a-1,mmr-mir-320a-3,efu-mir-320,ssc-mir-320,mmr-mir-320a-2,	mmu-mir-320	gcctcgccgccctccGCCTTCTCTTCCCGGTTCTTCCcggagtcgggAAAAGCTGGGTTGAGAGGGCGAaaaaggatgtggg	mmu-mir-320-p5	CGGTTCTTCCcggagtcggg	5'	New	gp1a	......(((((((.(((((((((..(((((((.((((((....)))))).)))))))..)))))))))....)))..)))).	75	63.4	-44.7	0	0	0	0	0	6	0	0	0	0	0	4.55948	low
196	337	mmu-miR-320-3p	AAAAGCTGGGTTGAGAGGGCGA	22	chr14	+	70443510	70443591	gcctcgccgccctccgccttctcttccCGGTTCTTCCCGGAGTCGGGAAAAGCTGGGTTGAGAGGGCGAaaaaggatgtggg	19	mmu-mir-320,rno-mir-320,cgr-mir-320a,hsa-mir-320a,ptr-mir-320a,ppy-mir-320a,mml-mir-320a,cja-mir-320-1,cfa-mir-320,pal-mir-320,ppa-mir-320a,nle-mir-320a,oga-mir-320a,mmr-mir-320a-4,mmr-mir-320a-1,mmr-mir-320a-3,efu-mir-320,ssc-mir-320,mmr-mir-320a-2,	mmu-mir-320	gcctcgccgccctccGCCTTCTCTTCCCGGTTCTTCCcggagtcgggAAAAGCTGGGTTGAGAGGGCGAaaaaggatgtggg	mmu-miR-320-3p	AAAAGCTGGGTTGAGAGGGCGA	3'	Yes	gp1a	......(((((((.(((((((((..(((((((.((((((....)))))).)))))))..)))))))))....)))..)))).	75	63.4	-44.7	7970	32419	35342	34701	22176	41293	14559.9	31488	38551.4	28851.3	18137.4	31379.1	high
197	338	mmu-miR-322-5p	CAGCAGCAATTCATGTTTTGGA	22	chrX	-	53054255	53054349	cctcgttgactccgaagggctgCAGCAGCAATTCATGTTTTGGAgtattgccaaggttcaAAACATGAAGCGCTGCAACAccccttcgtggggaa	4	mmu-mir-322,rno-mir-322-2,rno-mir-322-1,cgr-mir-322,	mmu-mir-322	cctcgttgactccgaagggctgCAGCAGCAATTCATGTTTTGGAgtattgccaaggttcaAAACATGAAGCGCTGCAACACcccttcgtggggaa	mmu-miR-322-5p	CAGCAGCAATTCATGTTTTGGA	5'	Yes	gp1a	.........((((((((((.((..(((((..(((((((((((((............)))))))))))))..)))))..)).))))))).)))...	83	51.6	-40.8	486	1041	588	502	901	831	887.841	1011.1	641.396	417.375	736.915	631.489	middle
197	339	mmu-miR-322-3p_R-1	AAACATGAAGCGCTGCAACA	20	chrX	-	53054255	53054349	cctcgttgactccgaagggctgCAGCAGCAATTCATGTTTTGGAgtattgccaaggttcaAAACATGAAGCGCTGCAACAccccttcgtggggaa	4	mmu-mir-322,rno-mir-322-2,rno-mir-322-1,cgr-mir-322,	mmu-mir-322	cctcgttgactccgaagggctgCAGCAGCAATTCATGTTTTGGAgtattgccaaggttcaAAACATGAAGCGCTGCAACACcccttcgtggggaa	mmu-miR-322-3p	AAACATGAAGCGCTGCAACAC	3'	Diff	gp1a	.........((((((((((.((..(((((..(((((((((((((............)))))))))))))..)))))..)).))))))).)))...	83	51.6	-40.8	947	3096	993	2012	2744	1685	1730.01	3007.09	1083.17	1672.83	2244.28	1280.46	middle
198	340	mmu-miR-323-5p	AGGTGGTCCGTGGCGCGTTCGC	22	chr12	+	109712497	109712601	actgctgctgcttggtacttggagagAGGTGGTCCGTGGCGCGTTCGCttcatttatggcgCACATTACACGGTCGACCTCTttgcggtatctaatcccgccttg	19	mmu-mir-323,rno-mir-323,cpo-mir-323a,hsa-mir-323a,bta-mir-323,eca-mir-323,ppy-mir-323,mml-mir-323a,ptr-mir-323,cfa-mir-323,pal-mir-323,ocu-mir-323a,ppa-mir-323,efu-mir-323,ssc-mir-323,ggo-mir-323a,dno-mir-323a,chi-mir-323a,oar-mir-323a,	mmu-mir-323	ttggtacttggagagAGGTGGTCCGTGGCGCGTTCGCttcatttatggcgCACATTACACGGTCGACCTCTttgcggtatctaatc	mmu-miR-323-5p	AGGTGGTCCGTGGCGCGTTCGC	5'	Yes	gp1a	...((....))..(((((.((.((((((((((.(((((....((.((((........)))).))....))))))).)))))))).))))))).............	79	55.2	-34.8	0	0	7	12	13	6	0	0	7.63567	9.97709	10.6325	4.55948	middle
198	341	mmu-miR-323-3p	CACATTACACGGTCGACCTCT	21	chr12	+	109712497	109712601	actgctgctgcttggtacttggagagAGGTGGTCCGTGGCGCGTTCGCttcatttatggcgCACATTACACGGTCGACCTCTttgcggtatctaatcccgccttg	19	mmu-mir-323,rno-mir-323,cpo-mir-323a,hsa-mir-323a,bta-mir-323,eca-mir-323,ppy-mir-323,mml-mir-323a,ptr-mir-323,cfa-mir-323,pal-mir-323,ocu-mir-323a,ppa-mir-323,efu-mir-323,ssc-mir-323,ggo-mir-323a,dno-mir-323a,chi-mir-323a,oar-mir-323a,	mmu-mir-323	ttggtacttggagagAGGTGGTCCGTGGCGCGTTCGCttcatttatggcgCACATTACACGGTCGACCTCTttgcggtatctaatc	mmu-miR-323-3p	CACATTACACGGTCGACCTCT	3'	Yes	gp1a	...((....))..(((((.((.((((((((((.(((((....((.((((........)))).))....))))))).)))))))).))))))).............	79	55.2	-34.8	52	101	60	196	170	134	94.9953	98.0994	65.4486	162.959	139.041	101.828	middle
199	342	mmu-miR-324-5p	CGCATCCCCTAGGGCATTGGTGT	23	chr11	+	70012042	70012149	gaactgactatgcctcctCGCATCCCCTAGGGCATTGGTGTaaagctggagacccACTGCCCCAGGTGCTGCTGGGggttgtagtctgacccaactgtgaagaaagcc	22	mmu-mir-324,rno-mir-324,cpo-mir-324,dno-mir-324,ocu-mir-324,cgr-mir-324,hsa-mir-324,eca-mir-324,ppy-mir-324,mml-mir-324,bta-mir-324,ptr-mir-324,cja-mir-324,cfa-mir-324,efu-mir-324,ssc-mir-324,ggo-mir-324,pal-mir-324,tch-mir-324,nle-mir-324,chi-mir-324,mmr-mir-324,	mmu-mir-324	aactgactatgcctcctCGCATCCCCTAGGGCATTGGTGTaaagctggagacCCACTGCCCCAGGTGCTGCTgggggttgtagtctgac	mmu-miR-324-5p	CGCATCCCCTAGGGCATTGGTGT	5'	Yes	gp1a	.....((((((..((((..(((...(((.(((((.(((.((..........))))).))))).)))...)))..))))..))))))......................	81	57.4	-36.2	1005	1646	2399	1782	2284	3139	1835.97	1598.73	2616.85	1481.6	1868.05	2385.37	middle
199	343	mmu-miR-324-3p_L-2R+3	ACTGCCCCAGGTGCTGCTGGT	21	chr11	+	70012042	70012149	gaactgactatgcctcctCGCATCCCCTAGGGCATTGGTGTaaagctggagacccACTGCCCCAGGTGCTGCTGGGggttgtagtctgacccaactgtgaagaaagcc	22	mmu-mir-324,rno-mir-324,cpo-mir-324,dno-mir-324,ocu-mir-324,cgr-mir-324,hsa-mir-324,eca-mir-324,ppy-mir-324,mml-mir-324,bta-mir-324,ptr-mir-324,cja-mir-324,cfa-mir-324,efu-mir-324,ssc-mir-324,ggo-mir-324,pal-mir-324,tch-mir-324,nle-mir-324,chi-mir-324,mmr-mir-324,	mmu-mir-324	aactgactatgcctcctCGCATCCCCTAGGGCATTGGTGTaaagctggagacCCACTGCCCCAGGTGCTGCTgggggttgtagtctgac	mmu-miR-324-3p	CCACTGCCCCAGGTGCTGCT	3'	Diff	gp1a	.....((((((..((((..(((...(((.(((((.(((.((..........))))).))))).)))...)))..))))..))))))......................	81	57.4	-36.2	464	858	1640	1677	1746	1972	847.65	833.359	1788.93	1394.3	1428.03	1498.55	middle
200	344	mmu-miR-325-3p	TTTATTGAGCACCTCCTATCAA	22	chrX	-	105379082	105379179	atatagtgcttggttcctagtaggtgctcagtaagtgtttgtgacataattcgTTTATTGAGCACCTCCTATCAAtcaagcactgtgctaggctctgg	8	mmu-mir-325,rno-mir-325,cgr-mir-325,hsa-mir-325,mml-mir-325,cfa-mir-325,ssc-mir-325,ocu-mir-325,	mmu-mir-325	atatagtgcttggttCCTAGTAGGTGCTCAGTAAGTGTttgtgacataattcgTTTATTGAGCACCTCCTATCAAtcaagcactgtgctaggctctgg	mmu-miR-325-3p	TTTATTGAGCACCTCCTATCAA	3'	Yes	gp1a	.((((((((((((((..(((.(((((((((((((..(.((((...))))..)..))))))))))))).)))..))))))))))))))...........	86	42.9	-41.6	0	5	0	5	0	0	0	4.85641	0	4.15712	0	0	low
201	345	chi-miR-326-5p_1ss5GA	CCTCATCTGTCTGTTGGGCT	20	chr7	+	99552265	99552363	gagCCTCATCTGTCTGTTGGGCTgggggcagggcctttgtgaaggcgggttatgctcagatcgCCTCTGGGCCCTTCCTCCAGTcccgaggcagattta	12	mmu-mir-326,rno-mir-326,cpo-mir-326,cgr-mir-326,hsa-mir-326,ppy-mir-326,bta-mir-326,ptr-mir-326,ssc-mir-326,ggo-mir-326,ocu-mir-326,chi-mir-326,	chi-mir-326	ggagCCTCGTCTGTCTGTTGGGCTggaggcagggcctttgtgaaggcgggttgtgctcagatcgCCTCTGGGCCCTTCCTCCAGCccagaggcggattcacc	chi-miR-326-5p	CCTCGTCTGTCTGTTGGGCT	5'	Diff	gp1a	.......((((((((...((((((((((.(((((((......((((((............))))))..))))))).))))))))))..))))))))...	89	60.6	-50.9	0	6	14	13	15	12	0	5.82769	15.2713	10.8085	12.2683	9.11897	middle
201	346	mmu-miR-326-3p	CCTCTGGGCCCTTCCTCCAGT	21	chr7	+	99552265	99552363	gagCCTCATCTGTCTGTTGGGCTgggggcagggcctttgtgaaggcgggttatgctcagatcgCCTCTGGGCCCTTCCTCCAGTcccgaggcagattta	12	mmu-mir-326,rno-mir-326,cpo-mir-326,cgr-mir-326,hsa-mir-326,ppy-mir-326,bta-mir-326,ptr-mir-326,ssc-mir-326,ggo-mir-326,ocu-mir-326,chi-mir-326,	mmu-mir-326	ctcatctgtctgttgggctGGGGGCAGGGCCTTTGTGAAGGCGggttatgctcagatcgCCTCTGGGCCCTTCCTCCAGTcccgaggcagattta	mmu-miR-326-3p	CCTCTGGGCCCTTCCTCCAGT	3'	Yes	gp1a	.......((((((((...((((((((((.(((((((......((((((............))))))..))))))).))))))))))..))))))))...	89	60.6	-50.9	3992	5517	13305	11344	11772	12292	7292.72	5358.56	14513.2	9431.68	9628.15	9340.86	high
202	347	mmu-miR-327	ACTTGAGGGGCATGAGGAT	19	chr14	-	44947443	44947511	tgcccttataACTTGAGGGGCATGAGGATagtcagtagtccaacatccctcttgatggcacattgcaca	1	mmu-mir-327,	mmu-mir-327	tgcccttataACTTGAGGGGCATGAGGATagtcagtagtccaacatccctcttgatggcacattgcaca	mmu-miR-327	ACTTGAGGGGCATGAGGAT	5'	Yes	gp1a	(((((((........)))))))........((((((.(((((.((.......)).))).)))))).)).	22	47.8	-17.2	0	0	0	0	6	0	0	0	0	0	4.90731	0	low
203	348	mmu-mir-328-p5	TGTCTCGGAGCCTGGGGCA	19	chr8	-	105308364	105308470	aagtcctgggcTGTCTCGGAGCCTGGGGCAggggggcaggaggggctcagggagaaagtatctacagcccCTGGCCCTCTCTGCCCTTCCGTcccctgtccccaagt	18	mmu-mir-328,rno-mir-328a,cgr-mir-328,hsa-mir-328,bta-mir-328,eca-mir-328,ptr-mir-328,ppy-mir-328,mml-mir-328,cja-mir-328,cfa-mir-328,ggo-mir-328,dno-mir-328,ocu-mir-328,chi-mir-328,tch-mir-328,ppa-mir-328,mmr-mir-328,	mmu-mir-328	ctgtctcggagcctggggcaGGGGGGCAGGAGGGGCTCAGGGagaaagtatctacagcccCTGGCCCTCTCTGCCCTTCCGTcccctgtccccaagt	mmu-mir-328-p5	tgtctcggagcctggggca	5'	New	gp1a	..(..(((((....)))))..).((((((((((((((((..(((((.((((((((.....))).....))))))))))..))))).......)))))).)))))...	20	66.4	-55.5	0	6	22	7	24	0	0	5.82769	23.9978	5.81997	19.6293	0	middle
203	349	mmu-miR-328-3p	CTGGCCCTCTCTGCCCTTCCGT	22	chr8	-	105308364	105308470	aagtcctgggcTGTCTCGGAGCCTGGGGCAggggggcaggaggggctcagggagaaagtatctacagcccCTGGCCCTCTCTGCCCTTCCGTcccctgtccccaagt	18	mmu-mir-328,rno-mir-328a,cgr-mir-328,hsa-mir-328,bta-mir-328,eca-mir-328,ptr-mir-328,ppy-mir-328,mml-mir-328,cja-mir-328,cfa-mir-328,ggo-mir-328,dno-mir-328,ocu-mir-328,chi-mir-328,tch-mir-328,ppa-mir-328,mmr-mir-328,	mmu-mir-328	ctgtctcggagcctggggcaGGGGGGCAGGAGGGGCTCAGGGagaaagtatctacagcccCTGGCCCTCTCTGCCCTTCCGTcccctgtccccaagt	mmu-miR-328-3p	CTGGCCCTCTCTGCCCTTCCGT	3'	Yes	gp1a	..(..(((((....)))))..).((((((((((((((((..(((((.((((((((.....))).....))))))))))..))))).......)))))).)))))...	20	66.4	-55.5	7994	19100	24772.5	15261	13233.5	20899	14603.7	18551.5	27022.1	12688.4	10823.5	15881.4	high
204	350	mmu-miR-329-5p_R+1	AGAGGTTTTCTGGGTCTCTGTTT	23	chr12	+	109713481	109713577	tgttcgcttctggtaccggaagAGAGGTTTTCTGGGTCTCTGTTTctttgatgagaatgaAACACACCCAGCTAACCTTTTTttcagtatcaaatcc	3	mmu-mir-329,rno-mir-329,mml-mir-329-2,	mmu-mir-329	tgttcgcttctggtaccggaagAGAGGTTTTCTGGGTCTCTGTTtctttgatgagaatgaAACACACCCAGCTAACCTTTTTttcagtatcaaatcc	mmu-miR-329-5p	AGAGGTTTTCTGGGTCTCTGTT	5'	Diff	gp1a	..........((((((.((((((((((((..((((((...(((((((((.....))).)))))).))))))..)))))))))))).)))))).....	82	42.3	-36.6	578	1532	1294	2248	2309	2930	1055.91	1488	1411.51	1869.04	1888.5	2226.55	middle
204	351	mmu-miR-329-3p	AACACACCCAGCTAACCTTTTT	22	chr12	+	109713481	109713577	tgttcgcttctggtaccggaagAGAGGTTTTCTGGGTCTCTGTTTctttgatgagaatgaAACACACCCAGCTAACCTTTTTttcagtatcaaatcc	3	mmu-mir-329,rno-mir-329,mml-mir-329-2,	mmu-mir-329	tgttcgcttctggtaccggaagAGAGGTTTTCTGGGTCTCTGTTtctttgatgagaatgaAACACACCCAGCTAACCTTTTTttcagtatcaaatcc	mmu-miR-329-3p	AACACACCCAGCTAACCTTTTT	3'	Yes	gp1a	..........((((((.((((((((((((..((((((...(((((((((.....))).)))))).))))))..)))))))))))).)))))).....	82	42.3	-36.6	227	570	466	469	1405	1202	414.691	553.63	508.318	389.938	1149.13	913.417	middle
205	352	mmu-miR-330-5p_R-1	TCTCTGGGCCTGTGTCTTAGG	21	chr7	+	19181454	19181567	tcgtgctgtgtgaccctttggcgatctctgccTCTCTGGGCCTGTGTCTTAGGctcttcaagatccaacgagCAAAGCACAGGGCCTGCAGAGAggtagcgctctgctccttac	14	mmu-mir-330,rno-mir-330,cgr-mir-330,hsa-mir-330,ppy-mir-330,mml-mir-330,bta-mir-330,eca-mir-330,ptr-mir-330,cfa-mir-330,efu-mir-330,ssc-mir-330,ggo-mir-330,chi-mir-330,	mmu-mir-330	gaccctttggcgatctctgccTCTCTGGGCCTGTGTCTTAGGCtcttcaagatccaacgaGCAAAGCACAGGGCCTGCAGAGAggtagcgctctgctc	mmu-miR-330-5p	TCTCTGGGCCTGTGTCTTAGGC	5'	Diff	gp1a	...................((((....(((((((((((((((((((.(((..((((.............)))).))))))).))))..)))))))))))))))...........	84	57	-41	95	230	321	373	269	227	173.549	223.395	350.15	310.121	220.011	172.501	middle
205	353	mmu-miR-330-3p_L-1	CAAAGCACAGGGCCTGCAGAGA	22	chr7	+	19181454	19181567	tcgtgctgtgtgaccctttggcgatctctgccTCTCTGGGCCTGTGTCTTAGGctcttcaagatccaacgagCAAAGCACAGGGCCTGCAGAGAggtagcgctctgctccttac	14	mmu-mir-330,rno-mir-330,cgr-mir-330,hsa-mir-330,ppy-mir-330,mml-mir-330,bta-mir-330,eca-mir-330,ptr-mir-330,cfa-mir-330,efu-mir-330,ssc-mir-330,ggo-mir-330,chi-mir-330,	mmu-mir-330	gaccctttggcgatctctgccTCTCTGGGCCTGTGTCTTAGGCtcttcaagatccaacgaGCAAAGCACAGGGCCTGCAGAGAggtagcgctctgctc	mmu-miR-330-3p	GCAAAGCACAGGGCCTGCAGAGA	3'	Diff	gp1a	...................((((....(((((((((((((((((((.(((..((((.............)))).))))))).))))..)))))))))))))))...........	84	57	-41	736	1889	2266	2682	1372	1952	1344.55	1834.75	2471.78	2229.88	1122.14	1483.35	middle
206	354	mmu-miR-331-5p_R-1	CTAGGTATGGTCCCAGGGATC	21	chr10	-	93963763	93963873	cactcccaaggagtctggttttgtttgggtttgttCTAGGTATGGTCCCAGGGATCccagatcaaaccagGCCCCTGGGCCTATCCTAGAAccaacctaaacccgtgcatc	21	mmu-mir-331,rno-mir-331,cpo-mir-331,cgr-mir-331,hsa-mir-331,bta-mir-331,cfa-mir-331,eca-mir-331,ptr-mir-331,ppy-mir-331,mml-mir-331,cja-mir-331,efu-mir-331,ssc-mir-331,ggo-mir-331,pal-mir-331,dno-mir-331,ocu-mir-331,chi-mir-331,nle-mir-331,aja-mir-331,	mmu-mir-331	gagtctggttttgtttgggtttgttCTAGGTATGGTCCCAGGGATCCcagatcaaaccagGCCCCTGGGCCTATCCTAGAAccaacctaaacccgt	mmu-miR-331-5p	CTAGGTATGGTCCCAGGGATCC	5'	Diff	gp1a	.(((((...)))))...((...(((((((((.((((((((.((((.(((((((..(.............)..))))))).)))))))))))).)))))))))....))...	91	53.2	-48.2	52	149	190	241	190	198	94.9953	144.721	207.254	200.373	155.398	150.463	middle
206	355	mmu-miR-331-3p	GCCCCTGGGCCTATCCTAGAA	21	chr10	-	93963763	93963873	cactcccaaggagtctggttttgtttgggtttgttCTAGGTATGGTCCCAGGGATCccagatcaaaccagGCCCCTGGGCCTATCCTAGAAccaacctaaacccgtgcatc	21	mmu-mir-331,rno-mir-331,cpo-mir-331,cgr-mir-331,hsa-mir-331,bta-mir-331,cfa-mir-331,eca-mir-331,ptr-mir-331,ppy-mir-331,mml-mir-331,cja-mir-331,efu-mir-331,ssc-mir-331,ggo-mir-331,pal-mir-331,dno-mir-331,ocu-mir-331,chi-mir-331,nle-mir-331,aja-mir-331,	mmu-mir-331	gagtctggttttgtttgggtttgttCTAGGTATGGTCCCAGGGATCCcagatcaaaccagGCCCCTGGGCCTATCCTAGAAccaacctaaacccgt	mmu-miR-331-3p	GCCCCTGGGCCTATCCTAGAA	3'	Yes	gp1a	.(((((...)))))...((...(((((((((.((((((((.((((.(((((((..(.............)..))))))).)))))))))))).)))))))))....))...	91	53.2	-48.2	2904	6459	10682	8227	6316	9519	5305.12	6273.5	11652	6840.13	5165.76	7233.62	high
207	356	mmu-miR-335-5p	TCAAGAGCAATAACGAAAAATGT	23	chr6	+	30741299	30741396	tcttttgggcgggggTCAAGAGCAATAACGAAAAATGTttgtttttcgtaaaccgTTTTTCATTATTGCTCCTGACCccctctcatgggttatagcca	14	mmu-mir-335,rno-mir-335,cpo-mir-335,cfa-mir-335,pal-mir-335,dno-mir-335,ocu-mir-335,tch-mir-335,bta-mir-335,eca-mir-335,cja-mir-335,efu-mir-335,ssc-mir-335,chi-mir-335,	mmu-mir-335	tcttttgggcgggggTCAAGAGCAATAACGAAAAATGTttgtttttcgtaaaccgTTTTTCATTATTGCTCCTGACCccctctcatgggttatagcca	mmu-miR-335-5p	TCAAGAGCAATAACGAAAAATGT	5'	Yes	gp1a	.....((((.((((((((.(((((((((.((((((((...((((.....)))))))))))).))))))))).)))))))).))))..(((....))).	80	42.9	-45.2	1206	2089	492	261	2231	1950	2203.16	2029.01	536.679	217.002	1824.7	1481.83	middle
207	357	mmu-miR-335-3p	TTTTTCATTATTGCTCCTGACC	22	chr6	+	30741299	30741396	tcttttgggcgggggTCAAGAGCAATAACGAAAAATGTttgtttttcgtaaaccgTTTTTCATTATTGCTCCTGACCccctctcatgggttatagcca	14	mmu-mir-335,rno-mir-335,cpo-mir-335,cfa-mir-335,pal-mir-335,dno-mir-335,ocu-mir-335,tch-mir-335,bta-mir-335,eca-mir-335,cja-mir-335,efu-mir-335,ssc-mir-335,chi-mir-335,	mmu-mir-335	tcttttgggcgggggTCAAGAGCAATAACGAAAAATGTttgtttttcgtaaaccgTTTTTCATTATTGCTCCTGACCccctctcatgggttatagcca	mmu-miR-335-3p	TTTTTCATTATTGCTCCTGACC	3'	Yes	gp1a	.....((((.((((((((.(((((((((.((((((((...((((.....)))))))))))).))))))))).)))))))).))))..(((....))).	80	42.9	-45.2	142	134	54	8	72	71	259.41	130.152	58.9038	6.6514	58.8878	53.9539	middle
208	358	mmu-miR-337-5p	CGGCGTCATGCAGGAGTTGATT	22	chr12	+	109585789	109585886	cagtgtagtgagaagttggggggtgggaaCGGCGTCATGCAGGAGTTGATTgcacagccaTTCAGCTCCTATATGATGCCTTTcttcacccccttcaa	3	mmu-mir-337,rno-mir-337,cpo-mir-337,	mmu-mir-337	cagtgtagtgagaagttggggggtgggaaCGGCGTCATGCAGGAGTTGATTgcacagccatTCAGCTCCTATATGATGCCTTTcttcacccccttca	mmu-miR-337-5p	CGGCGTCATGCAGGAGTTGATT	5'	Yes	gp1a	.................((((((((((((.((((((((..(((((((((.((......)).)))))))))..)))))))).))).)))))))))....	77	52	-49.2	1635	5404	2982	6638	7951	6824	2986.87	5248.8	3252.8	5519	6503.01	5185.65	middle
208	359	mmu-miR-337-3p_L+1_1ss22TC	TTCAGCTCCTATATGATGCCTCT	23	chr12	+	109585789	109585886	cagtgtagtgagaagttggggggtgggaaCGGCGTCATGCAGGAGTTGATTgcacagccaTTCAGCTCCTATATGATGCCTTTcttcacccccttcaa	3	mmu-mir-337,rno-mir-337,cpo-mir-337,	mmu-mir-337	cagtgtagtgagaagttggggggtgggaaCGGCGTCATGCAGGAGTTGATTgcacagccatTCAGCTCCTATATGATGCCTTTcttcacccccttca	mmu-miR-337-3p	TCAGCTCCTATATGATGCCTTT	3'	Diff	gp1a	.................((((((((((((.((((((((..(((((((((.((......)).)))))))))..)))))))).))).)))))))))....	77	52	-49.2	23	83	89	82	148	113	42.0171	80.6163	97.0821	68.1768	121.047	85.8703	middle
209	360	mmu-miR-338-5p_R-1	AACAATATCCTGGTGCTGAGT	21	chr11	-	120014764	120014868	cagctccaacgctgcacaggccgtcctccccAACAATATCCTGGTGCTGAGTgggtgcacagtgacTCCAGCATCAGTGATTTTGTTgaagagggcagctgccag	18	mmu-mir-338,rno-mir-338,cpo-mir-338,cgr-mir-338,hsa-mir-338,bta-mir-338,chi-mir-338,eca-mir-338,ptr-mir-338,mdo-mir-338,ppy-mir-338,mml-mir-338,cja-mir-338,cfa-mir-338,efu-mir-338,ssc-mir-338,ggo-mir-338,pal-mir-338,	mmu-mir-338	caacgctgcacaggccgtcctccccAACAATATCCTGGTGCTGAGTGggtgcacagtgacTCCAGCATCAGTGATTTTGTTGaagagggcagctgcca	mmu-miR-338-5p	AACAATATCCTGGTGCTGAGTG	5'	Diff	gp1a	((((......))))....(((.((((((..((((((.((((((((((((...((((........))))))))))))).))).))))))..)))))).))).....	82	57.1	-44.3	151	295	302	659	550	450	275.852	286.528	329.425	547.909	449.837	341.961	middle
209	361	mmu-miR-338-3p_R-1	TCCAGCATCAGTGATTTTGTT	21	chr11	-	120014764	120014868	cagctccaacgctgcacaggccgtcctccccAACAATATCCTGGTGCTGAGTgggtgcacagtgacTCCAGCATCAGTGATTTTGTTgaagagggcagctgccag	18	mmu-mir-338,rno-mir-338,cpo-mir-338,cgr-mir-338,hsa-mir-338,bta-mir-338,chi-mir-338,eca-mir-338,ptr-mir-338,mdo-mir-338,ppy-mir-338,mml-mir-338,cja-mir-338,cfa-mir-338,efu-mir-338,ssc-mir-338,ggo-mir-338,pal-mir-338,	mmu-mir-338	caacgctgcacaggccgtcctccccAACAATATCCTGGTGCTGAGTGggtgcacagtgacTCCAGCATCAGTGATTTTGTTGaagagggcagctgcca	mmu-miR-338-3p	TCCAGCATCAGTGATTTTGTTG	3'	Diff	gp1a	((((......))))....(((.((((((..((((((.((((((((((((...((((........))))))))))))).))).))))))..)))))).))).....	82	57.1	-44.3	16	66	55	86	77	94	29.2293	64.1046	59.9946	71.5025	62.9772	71.4319	middle
210	362	mmu-miR-339-5p	TCCCTGTCCTCCAGGAGCTCACG	23	chr5	-	139369650	139369745	acggggtggccactaTCCCTGTCCTCCAGGAGCTCACGtatgcctgcctgTGAGCGCCTCGGCGACAGAGCcggtgtccacccctgcactgtccac	4	mmu-mir-339,rno-mir-339,cpo-mir-339,cgr-mir-339,	mmu-mir-339	acggggtggccactaTCCCTGTCCTCCAGGAGCTCACGtatgcctgcctgTGAGCGCCTCGGCGACAGAGCCGgtgtccacccctgcactgtccac	mmu-miR-339-5p	TCCCTGTCCTCCAGGAGCTCACG	5'	Yes	gp1a	..(((((((.((((....(((((..(((((.(((((((((....)))..)))))).))).)).)))))....)))).)))))))............	82	66.7	-43.2	1974	3334	6897	8006	7830	7746	3606.17	3238.25	7523.32	6656.38	6404.04	5886.29	high
210	363	mmu-miR-339-3p_R-2	TGAGCGCCTCGGCGACAGAGC	21	chr5	-	139369650	139369745	acggggtggccactaTCCCTGTCCTCCAGGAGCTCACGtatgcctgcctgTGAGCGCCTCGGCGACAGAGCcggtgtccacccctgcactgtccac	4	mmu-mir-339,rno-mir-339,cpo-mir-339,cgr-mir-339,	mmu-mir-339	acggggtggccactaTCCCTGTCCTCCAGGAGCTCACGtatgcctgcctgTGAGCGCCTCGGCGACAGAGCCGgtgtccacccctgcactgtccac	mmu-miR-339-3p	TGAGCGCCTCGGCGACAGAGCCG	3'	Diff	gp1a	..(((((((.((((....(((((..(((((.(((((((((....)))..)))))).))).)).)))))....)))).)))))))............	82	66.7	-43.2	877	1519	1838	2658	2109	1739	1602.13	1475.38	2004.91	2209.93	1724.92	1321.49	middle
211	364	mmu-miR-340-5p	TTATAAAGCAATGAGACTGATT	22	chr11	+	50069702	50069811	caattgtacttggtgtgaTTATAAAGCAATGAGACTGATTgtcatatgtcgtttgtgggaTCCGTCTCAGTTACTTTATAGCcatacctggtatcttaacaccacagatc	25	mmu-mir-340,rno-mir-340-2,rno-mir-340-1,cpo-mir-340,cgr-mir-340,hsa-mir-340,bta-mir-340,eca-mir-340,ptr-mir-340,ppy-mir-340,mml-mir-340,cja-mir-340,cfa-mir-340,ssc-mir-340-2,ssc-mir-340-1,ggo-mir-340,pal-mir-340,dno-mir-340,ocu-mir-340,chi-mir-340,ppa-mir-340,nle-mir-340,dma-mir-340,oga-mir-340,mmr-mir-340,	mmu-mir-340	caattgtacttggtgtgaTTATAAAGCAATGAGACTGATTgtcatatgtcgtttgtgggaTCCGTCTCAGTTACTTTATAGCcatacctggtatctta	mmu-miR-340-5p	TTATAAAGCAATGAGACTGATT	5'	Yes	gp1a	.....((((..((((((..(((((((...((((((.(((...((((.......))))..))).))))))....)))))))..))))))..))))................	89	39.1	-31.3	5948	10752	8312	8281	4864	6927	10866	10443.2	9066.81	6885.03	3978.19	5263.93	high
211	365	mmu-miR-340-3p	TCCGTCTCAGTTACTTTATAGC	22	chr11	+	50069702	50069811	caattgtacttggtgtgaTTATAAAGCAATGAGACTGATTgtcatatgtcgtttgtgggaTCCGTCTCAGTTACTTTATAGCcatacctggtatcttaacaccacagatc	25	mmu-mir-340,rno-mir-340-2,rno-mir-340-1,cpo-mir-340,cgr-mir-340,hsa-mir-340,bta-mir-340,eca-mir-340,ptr-mir-340,ppy-mir-340,mml-mir-340,cja-mir-340,cfa-mir-340,ssc-mir-340-2,ssc-mir-340-1,ggo-mir-340,pal-mir-340,dno-mir-340,ocu-mir-340,chi-mir-340,ppa-mir-340,nle-mir-340,dma-mir-340,oga-mir-340,mmr-mir-340,	mmu-mir-340	caattgtacttggtgtgaTTATAAAGCAATGAGACTGATTgtcatatgtcgtttgtgggaTCCGTCTCAGTTACTTTATAGCcatacctggtatctta	mmu-miR-340-3p	TCCGTCTCAGTTACTTTATAGC	3'	Yes	gp1a	.....((((..((((((..(((((((...((((((.(((...((((.......))))..))).))))))....)))))))..))))))..))))................	89	39.1	-31.3	191	249	155	350	283	229	348.925	241.849	169.076	290.999	231.462	174.02	middle
212	366	mmu-miR-341-5p	CGGTCGGCCGATCGCTCGGTC	21	chr12	+	109611500	109611595	aaaatgatgatgtcagttggcCGGTCGGCCGATCGCTCGGTCtgtcagtcagtcggTCGGTCGATCGGTCGGTCGGTcagtcggcttcctgtcttc	2	mmu-mir-341,rno-mir-341,	mmu-mir-341	aaaatgatgatgtcagttggcCGGTCGGCCGATCGCTCGGTCtgtcagtcagtcggTCGGTCGATCGGTCGGTCGGTcagtcggcttcctgtcttc	mmu-miR-341-5p	CGGTCGGCCGATCGCTCGGTC	5'	Yes	gp1a	.....(((((.(((..(((((((..((((((((((..(((.(((.........))))))..))))))))))..)))))))..))).))..)))...	88	59.4	-45.6	0	15	5	0	7	7	0	14.5692	5.45405	0	5.7252	5.3194	middle
212	367	mmu-miR-341-3p	TCGGTCGATCGGTCGGTCGGT	21	chr12	+	109611500	109611595	aaaatgatgatgtcagttggcCGGTCGGCCGATCGCTCGGTCtgtcagtcagtcggTCGGTCGATCGGTCGGTCGGTcagtcggcttcctgtcttc	2	mmu-mir-341,rno-mir-341,	mmu-mir-341	aaaatgatgatgtcagttggcCGGTCGGCCGATCGCTCGGTCtgtcagtcagtcggTCGGTCGATCGGTCGGTCGGTcagtcggcttcctgtcttc	mmu-miR-341-3p	TCGGTCGATCGGTCGGTCGGT	3'	Yes	gp1a	.....(((((.(((..(((((((..((((((((((..(((.(((.........))))))..))))))))))..)))))))..))).))..)))...	88	59.4	-45.6	355	1199	1131	1758	1493	1913	648.526	1164.57	1233.71	1461.64	1221.1	1453.72	middle
213	368	mmu-miR-342-5p_R+1	AGGGGTGCTATCTGTGATTGAGG	23	chr12	+	108658616	108658718	ctgtgaaaatgggctcaaggtgAGGGGTGCTATCTGTGATTGAGGgacatggtcaatggaattgTCTCACACAGAAATCGCACCCGTcaccttggcctgctga	21	mmu-mir-342,rno-mir-342,cpo-mir-342,cgr-mir-342,hsa-mir-342,ppy-mir-342,mml-mir-342,eca-mir-342,ptr-mir-342,cja-mir-342,cfa-mir-342,efu-mir-342,ssc-mir-342,ggo-mir-342,pal-mir-342,dno-mir-342,ocu-mir-342,tch-mir-342,ppa-mir-342,oga-mir-342,mmr-mir-342,	mmu-mir-342	gaaaatgggctcaaggtgAGGGGTGCTATCTGTGATTGAGggacatggtcaatggaattgTCTCACACAGAAATCGCACCCGTcaccttggcctgctga	mmu-miR-342-5p	AGGGGTGCTATCTGTGATTGAG	5'	Diff	gp1a	..........((((.((((((((.((((((..((((((.....((((((...((....))..)))))).))))))....)))))).)))))))))))).....	88	51.5	-48.8	175	258	381	441	249	384	319.696	250.591	415.599	366.658	203.653	291.807	middle
213	369	mmu-miR-342-3p	TCTCACACAGAAATCGCACCCGT	23	chr12	+	108658616	108658718	ctgtgaaaatgggctcaaggtgAGGGGTGCTATCTGTGATTGAGGgacatggtcaatggaattgTCTCACACAGAAATCGCACCCGTcaccttggcctgctga	21	mmu-mir-342,rno-mir-342,cpo-mir-342,cgr-mir-342,hsa-mir-342,ppy-mir-342,mml-mir-342,eca-mir-342,ptr-mir-342,cja-mir-342,cfa-mir-342,efu-mir-342,ssc-mir-342,ggo-mir-342,pal-mir-342,dno-mir-342,ocu-mir-342,tch-mir-342,ppa-mir-342,oga-mir-342,mmr-mir-342,	mmu-mir-342	gaaaatgggctcaaggtgAGGGGTGCTATCTGTGATTGAGggacatggtcaatggaattgTCTCACACAGAAATCGCACCCGTcaccttggcctgctga	mmu-miR-342-3p	TCTCACACAGAAATCGCACCCGT	3'	Yes	gp1a	..........((((.((((((((.((((((..((((((.....((((((...((....))..)))))).))))))....)))))).)))))))))))).....	88	51.5	-48.8	10991	14437	18723	23547	28315	31330	20078.7	14022.4	20423.2	19577.6	23158.4	23808.1	high
214	370	mmu-mir-344g-p3	TAGCCAGGGGCTTGACTGCA	20	chr7	-	61982287	61982365	aatttctgccagtcaggctcctggcaggagtcctgctctcagctggttccaggctcTAGCCAGGGGCTTGACTGCAagc	2	mmu-mir-344g,rno-mir-344g,	mmu-mir-344g	tgccAGTCAGGCTCCTGGCAGGAGTcctgctctcagctggttcCAGGCTCTAGCCAGGGGCTTGActgcaa	mmu-mir-344g-p3	TAGCCAGGGGCTTGActgca	3'	New	gp1a	......((.((((((((((((((((..(((.((((...((....))...)))))))..))))))))))))))))))...	70	59.5	-44	0	0	0	7	0	0	0	0	0	5.81997	0	0	low
215	371	mmu-miR-344d-3-5p_R-2	AGTCAGGCTAGTGGTTATACT	21	chr7	-	61726249	61726328	agatttcatcAGTCAGGCTAGTGGTTATACTccaggacttatctggtcctgGATATAACCACTGCCAGACTGAatggtgc	1	mmu-mir-344d-3,	mmu-mir-344d-3	agatttcatcAGTCAGGCTAGTGGTTATACTCCaggacttatctggtcctgGATATAACCACTGCCAGACTGAatggtgc	mmu-miR-344d-3-5p	AGTCAGGCTAGTGGTTATACTCC	5'	Diff	gp1a	.....(((((((((.(((.((((((((((.(((((((((.....)))))))))))))))))))))).)))))).)))...	72	46.2	-45.2	0	0	0	5	0	0	0	0	0	4.15712	0	0	low
215	372	mmu-miR-344d-3p	GATATAACCACTGCCAGACTGA	22	chr7	-	61726249	61726328	agatttcatcAGTCAGGCTAGTGGTTATACTccaggacttatctggtcctgGATATAACCACTGCCAGACTGAatggtgc	1	mmu-mir-344d-3,	mmu-mir-344d-3	agatttcatcAGTCAGGCTAGTGGTTATACTCCaggacttatctggtcctgGATATAACCACTGCCAGACTGAatggtgc	mmu-miR-344d-3p	GATATAACCACTGCCAGACTGA	3'	Yes	gp1a	.....(((((((((.(((.((((((((((.(((((((((.....)))))))))))))))))))))).)))))).)))...	72	46.2	-45.2	0	0	2.33333	21.6667	29.3333	25.6667	0	0	2.54522	18.0142	23.9913	19.5045	middle
216	373	mmu-miR-344d-3p	GATATAACCACTGCCAGACTGA	22	chr7	-	61685272	61685351	agatttcattagtctggttgctggctatattccaggacttatctggtcctgGATATAACCACTGCCAGACTGAatggtgc	1	mmu-mir-344d-2,	mmu-mir-344d-2	agatttcattAGTCTGGTTGCTGGCTATATTCCAggacttatctggtcctgGATATAACCACTGCCAGACTGAatggtgc	mmu-miR-344d-3p	GATATAACCACTGCCAGACTGA	3'	Yes	gp1a	.....(((((((((((((...(((.(((((.((((((((.....))))))))))))).)))..)))))))))).)))...	72	45	-37.6	0	0	2.33333	21.6667	29.3333	25.6667	0	0	2.54522	18.0142	23.9913	19.5045	middle
217	374	mmu-miR-344b-3p	CATTTAGCCAAAGCCTGACTGT	22	chr7	-	61790519	61790581	atcagtcaggctcctggctaaagttcagctttcagctgCATTTAGCCAAAGCCTGACTGTaag	1	mmu-mir-344b,	mmu-mir-344b	atcAGTCAGGCTCCTGGCTAAAGTTCagctttcagctgCATTTAGCCAAAGCCTGACTGTaag	mmu-miR-344b-3p	CATTTAGCCAAAGCCTGACTGT	3'	Yes	gp1a	..((((((((((..((((((((...((((.....))))..)))))))).))))))))))....	57	47.6	-35.1	7	63	7	55	65	72	12.7878	61.1907	7.63567	45.7283	53.1626	54.7138	middle
218	375	mmu-miR-344d-3p	GATATAACCACTGCCAGACTGA	22	chr7	-	61683124	61683192	atcagtcaggctgctggctatacaccaggacttatctggtcctgGATATAACCACTGCCAGACTGAaag	1	mmu-mir-344d-1,	mmu-mir-344d-1	atcAGTCAGGCTGCTGGCTATACACCAggacttatctggtcctgGATATAACCACTGCCAGACTGAaag	mmu-miR-344d-3p	GATATAACCACTGCCAGACTGA	3'	Yes	gp1a	.((((((.(((...(((.((((..((((((((.....)))))))).)))).)))..))).))))))...	65	49.3	-32.6	0	0	2.33333	21.6667	29.3333	25.6667	0	0	2.54522	18.0142	23.9913	19.5045	middle
219	376	mmu-miR-344-5p_L-2R-2	TCAGGCTCCTGGCTAGATTCCA	22	chr7	-	61877770	61877864	ctgcagccagggtttttaccagTCAGGCTCCTGGCTAGATTCCAggtaccagctggtaccTGATCTAGCCAAAGCCTGACTGTaagccctgaaca	1	mmu-mir-344-1,	mmu-mir-344-1	ctgcagccagggtttttaccAGTCAGGCTCCTGGCTAGATTCCAGGtaccagctggtaccTGATCTAGCCAAAGCCTGACTGTaagccctgaaca	mmu-miR-344-5p	AGTCAGGCTCCTGGCTAGATTCCAGG	5'	Diff	gp1a	.......((((((((....((((((((((..(((((((((..((((((((....))))))))))))))))).)))))))))).))))))))....	84	53.7	-58.1	0	4	0	0	2.5	0	0	3.88512	0	0	2.04471	0	low
219	377	mmu-miR-344-3p	TGATCTAGCCAAAGCCTGACTGT	23	chr7	-	61877770	61877864	ctgcagccagggtttttaccagTCAGGCTCCTGGCTAGATTCCAggtaccagctggtaccTGATCTAGCCAAAGCCTGACTGTaagccctgaaca	1	mmu-mir-344-1,	mmu-mir-344-1	ctgcagccagggtttttaccAGTCAGGCTCCTGGCTAGATTCCAGGtaccagctggtaccTGATCTAGCCAAAGCCTGACTGTaagccctgaaca	mmu-miR-344-3p	TGATCTAGCCAAAGCCTGACTGT	3'	Yes	gp1a	.......((((((((....((((((((((..(((((((((..((((((((....))))))))))))))))).)))))))))).))))))))....	84	53.7	-58.1	9.5	19.5	17.5	34	34.5	29.5	17.3549	18.94	19.0892	28.2684	28.217	22.4175	middle
220	378	mmu-miR-344-5p_L-2R-2	TCAGGCTCCTGGCTAGATTCCA	22	chr7	-	61940010	61940116	gcagccagggtttttaccagTCAGGCTCCTGGCTAGATTCCAggtaccaactggtaccTGATCTAGCCAAAGCCTGACTGTaagctgcaaaagaaaaggaggactgc	4	mmu-mir-344-2,rno-mir-344a-1,rno-mir-344a-2,cgr-mir-344,	mmu-mir-344-2	tttttaccAGTCAGGCTCCTGGCTAGATTCCAGGtaccaactggtaccTGATCTAGCCAAAGCCTGACTGTaagctgcaa	mmu-miR-344-5p	AGTCAGGCTCCTGGCTAGATTCCAGG	5'	Diff	gp1a	(((((...(((....))).((((((((..(((((((((..((((((((....))))))))))))))))).)))))))).....)))))...................	59	51.4	-54.3	0	4	0	0	2.5	0	0	3.88512	0	0	2.04471	0	low
220	379	mmu-miR-344-3p	TGATCTAGCCAAAGCCTGACTGT	23	chr7	-	61940010	61940116	gcagccagggtttttaccagTCAGGCTCCTGGCTAGATTCCAggtaccaactggtaccTGATCTAGCCAAAGCCTGACTGTaagctgcaaaagaaaaggaggactgc	4	mmu-mir-344-2,rno-mir-344a-1,rno-mir-344a-2,cgr-mir-344,	mmu-mir-344-2	tttttaccAGTCAGGCTCCTGGCTAGATTCCAGGtaccaactggtaccTGATCTAGCCAAAGCCTGACTGTaagctgcaa	mmu-miR-344-3p	TGATCTAGCCAAAGCCTGACTGT	3'	Yes	gp1a	(((((...(((....))).((((((((..(((((((((..((((((((....))))))))))))))))).)))))))).....)))))...................	59	51.4	-54.3	9.5	19.5	17.5	34	34.5	29.5	17.3549	18.94	19.0892	28.2684	28.217	22.4175	middle
221	380	mmu-miR-345-5p_R-1	GCTGACCCCTAGTCCAGTGCT	21	chr12	+	108836973	108837068	acccaagtccaggcctGCTGACCCCTAGTCCAGTGCTtgtggtggctactgggcCCTGAACTAGGGGTCTGGAGAcctgggtttgatctccacagg	4	mmu-mir-345,rno-mir-345,cgr-mir-345,pal-mir-345,	mmu-mir-345	acccaagtccaggcctGCTGACCCCTAGTCCAGTGCTTgtggtggctactgggcCCTGAACTAGGGGTCTGGAGACctgggtttgatctccacagg	mmu-miR-345-5p	GCTGACCCCTAGTCCAGTGCTT	5'	Diff	gp1a	...(((..(((((.((.((((((((((((.(((.((..((((...))))...)).))).)))))))))).)))).)))))..)))...........	82	60.4	-43.6	494	694	966	942	1110	1057	902.455	674.069	1053.72	783.202	907.853	803.229	middle
221	381	mmu-miR-345-3p_R-1_1ss21AT	CCTGAACTAGGGGTCTGGAGT	21	chr12	+	108836973	108837068	acccaagtccaggcctGCTGACCCCTAGTCCAGTGCTtgtggtggctactgggcCCTGAACTAGGGGTCTGGAGAcctgggtttgatctccacagg	4	mmu-mir-345,rno-mir-345,cgr-mir-345,pal-mir-345,	mmu-mir-345	acccaagtccaggcctGCTGACCCCTAGTCCAGTGCTTgtggtggctactgggcCCTGAACTAGGGGTCTGGAGACctgggtttgatctccacagg	mmu-miR-345-3p	CCTGAACTAGGGGTCTGGAGAC	3'	Diff	gp1a	...(((..(((((.((.((((((((((((.(((.((..((((...))))...)).))).)))))))))).)))).)))))..)))...........	82	60.4	-43.6	254	465	509	978	571	760	464.015	451.646	555.222	813.133	467.013	577.535	middle
222	382	mmu-miR-346-5p	TGTCTGCCCGAGTGCCTGCCTCT	23	chr14	+	34894604	34894714	aggtctctgtgttgggcgtcTGTCTGCCCGAGTGCCTGCCTCTctgttgctctgaaggaggcaggggctgggcctgcagctgcctgggcagagctgctccttcgagggaca	14	mmu-mir-346,rno-mir-346,cpo-mir-346,ocu-mir-346,hsa-mir-346,eca-mir-346,ppy-mir-346,bta-mir-346,ptr-mir-346,mml-mir-346,cfa-mir-346,ggo-mir-346,pal-mir-346,chi-mir-346,	mmu-mir-346	tctgtgttgggcgtcTGTCTGCCCGAGTGCCTGCCTCTctgttgctctgaaggAGGCAGGGGCTGGGCCTGCAGCtgcctgggcagagctgctccttc	mmu-miR-346-5p	TGTCTGCCCGAGTGCCTGCCTCT	5'	Yes	gp1a	..((((((.....((((..((((..((((.((..((((((((.((..........))))))))))..))))))..))))..))))(((((....))))).....)))))).	72	64.9	-52.6	18	72	36	89	55	99	32.883	69.9322	39.2692	73.9968	44.9837	75.2315	middle
223	383	mmu-miR-350-5p_R+2	AAAGTGCATGCGCTTTGGGAC	21	chr1	-	176772325	176772423	agatgccttgctcctacaagagtAAAGTGCATGCGCTTTGGGACagtgaggaaaataatgTTCACAAAGCCCATACACTTTCaccctttaggagagttg	7	mmu-mir-350,rno-mir-350-1,rno-mir-350-2,cpo-mir-350,cgr-mir-350,cfa-mir-350,ocu-mir-350,	mmu-mir-350	agatgccttgctcctacaagagtAAAGTGCATGCGCTTTGGGacagtgaggaaaataatgTTCACAAAGCCCATACACTTTCaccctttaggagagttg	mmu-miR-350-5p	AAAGTGCATGCGCTTTGGG	5'	Diff	gp1a	..........((((((.(((.((((((((.(((.(((((((((((.............))))).)))))).))).)))))).)).))))))))).....	84	44.4	-32.1	288	434	437	1065	882	652	526.128	421.536	476.684	885.467	721.375	495.464	middle
223	384	mmu-miR-350-3p	TTCACAAAGCCCATACACTTTC	22	chr1	-	176772325	176772423	agatgccttgctcctacaagagtAAAGTGCATGCGCTTTGGGACagtgaggaaaataatgTTCACAAAGCCCATACACTTTCaccctttaggagagttg	7	mmu-mir-350,rno-mir-350-1,rno-mir-350-2,cpo-mir-350,cgr-mir-350,cfa-mir-350,ocu-mir-350,	mmu-mir-350	agatgccttgctcctacaagagtAAAGTGCATGCGCTTTGGGacagtgaggaaaataatgTTCACAAAGCCCATACACTTTCaccctttaggagagttg	mmu-miR-350-3p	TTCACAAAGCCCATACACTTTC	3'	Yes	gp1a	..........((((((.(((.((((((((.(((.(((((((((((.............))))).)))))).))).)))))).)).))))))))).....	84	44.4	-32.1	405	557	706	475	780	792	739.867	541.004	770.112	394.927	637.951	601.852	middle
224	385	mmu-miR-351-5p_R-1	TCCCTGAGGAGCCCTTTGAGCCT	23	chrX	-	53053255	53053353	catggcacctccgttTCCCTGAGGAGCCCTTTGAGCCTggagtgaaaaaaaaaaacaGGTCAAGAGGCGCCTGGGAACTggagaagagtgttaaacttc	3	mmu-mir-351,rno-mir-351-1,rno-mir-351-2,	mmu-mir-351	catggcacctccgttTCCCTGAGGAGCCCTTTGAGCCTGgagtgaaaaaaaaaaacaGGTCAAGAGGCGCCTGGGAACtggagaagagtgttaaacttc	mmu-miR-351-5p	TCCCTGAGGAGCCCTTTGAGCCTG	5'	Diff	gp1a	....((((((((..(((((..(((.(((..((((.((((................))))))))..))).))))))))..))))....))))........	87	50.5	-35.1	1514	5152	2809	5223	5874	4642	2765.82	5004.04	3064.09	4342.53	4804.26	3527.52	middle
224	386	mmu-miR-351-3p_R+1	GGTCAAGAGGCGCCTGGGAACT	22	chrX	-	53053255	53053353	catggcacctccgttTCCCTGAGGAGCCCTTTGAGCCTggagtgaaaaaaaaaaacaGGTCAAGAGGCGCCTGGGAACTggagaagagtgttaaacttc	3	mmu-mir-351,rno-mir-351-1,rno-mir-351-2,	mmu-mir-351	catggcacctccgttTCCCTGAGGAGCCCTTTGAGCCTGgagtgaaaaaaaaaaacaGGTCAAGAGGCGCCTGGGAACtggagaagagtgttaaacttc	mmu-miR-351-3p	GGTCAAGAGGCGCCTGGGAAC	3'	Diff	gp1a	....((((((((..(((((..(((.(((..((((.((((................))))))))..))).))))))))..))))....))))........	87	50.5	-35.1	109	371	141	187	207	271	199.125	360.345	153.804	155.476	169.302	205.937	middle
225	387	mmu-miR-361-5p	TTATCAGAATCTCCAGGGGTAC	22	chrX	-	113074810	113074894	ggaagcTTATCAGAATCTCCAGGGGTACttagtatttgaaaagtCCCCCAGGTGTGATTCTGATTTGTttccctctcctgctcct	20	mmu-mir-361,rno-mir-361,cpo-mir-361,cgr-mir-361,hsa-mir-361,ppy-mir-361,mml-mir-361,bta-mir-361,ptr-mir-361,cfa-mir-361,efu-mir-361,ssc-mir-361,pal-mir-361,dno-mir-361,ocu-mir-361,chi-mir-361,tch-mir-361,nle-mir-361,oga-mir-361,mmr-mir-361,	mmu-mir-361	gaagcTTATCAGAATCTCCAGGGGTACttagtatttgaaaagTCCCCCAGGTGTGATTCTGATTTGTttc	mmu-miR-361-5p	TTATCAGAATCTCCAGGGGTAC	5'	Yes	gp1a	((((((..(((((((((.((.((((.((((..........)))).)))).))...)))))))))..)))))).............	72	45.9	-32.2	1889	3492	2708	5725	5007	4945	3450.89	3391.71	2953.91	4759.9	4095.15	3757.78	middle
225	388	mmu-miR-361-3p_L-1	CCCCCAGGTGTGATTCTGATTTGT	24	chrX	-	113074810	113074894	ggaagcTTATCAGAATCTCCAGGGGTACttagtatttgaaaagtCCCCCAGGTGTGATTCTGATTTGTttccctctcctgctcct	20	mmu-mir-361,rno-mir-361,cpo-mir-361,cgr-mir-361,hsa-mir-361,ppy-mir-361,mml-mir-361,bta-mir-361,ptr-mir-361,cfa-mir-361,efu-mir-361,ssc-mir-361,pal-mir-361,dno-mir-361,ocu-mir-361,chi-mir-361,tch-mir-361,nle-mir-361,oga-mir-361,mmr-mir-361,	mmu-mir-361	gaagcTTATCAGAATCTCCAGGGGTACttagtatttgaaaagTCCCCCAGGTGTGATTCTGATTTGTttc	mmu-miR-361-3p	TCCCCCAGGTGTGATTCTGATTTGT	3'	Diff	gp1a	((((((..(((((((((.((.((((.((((..........)))).)))).))...)))))))))..)))))).............	72	45.9	-32.2	629	1402	1541	2499	1889	2165	1149.08	1361.74	1680.94	2077.73	1544.99	1645.21	middle
226	389	mmu-miR-362-5p	AATCCTTGGAACCTAGGTGTGAAT	24	chrX	-	7241972	7242069	gagccttcttgcttgctccccctctcgAATCCTTGGAACCTAGGTGTGAATgctgcttcagtgcAACACACCTGTTCAAGGATTCaaagaggctgagc	8	mmu-mir-362,rno-mir-362,cgr-mir-362,bta-mir-362,eca-mir-362,mml-mir-362,chi-mir-362,oar-mir-362,	mmu-mir-362	ctcgAATCCTTGGAACCTAGGTGTGAATgctgcttcagtgcAACACACCTGTTCAAGGATTCAaa	mmu-miR-362-5p	AATCCTTGGAACCTAGGTGTGAAT	5'	Yes	gp1a	((((......))))((((..(((((.(((((((((((...((((((((..(((.((....))))).)))))))))))))))))))..)))))..))))	84	52	-42.5	1531	1781	1643	2148	1928	2127	2796.88	1729.85	1792.2	1785.9	1576.88	1616.34	middle
226	390	mmu-miR-362-3p_R-1	AACACACCTGTTCAAGGATTC	21	chrX	-	7241972	7242069	gagccttcttgcttgctccccctctcgAATCCTTGGAACCTAGGTGTGAATgctgcttcagtgcAACACACCTGTTCAAGGATTCaaagaggctgagc	8	mmu-mir-362,rno-mir-362,cgr-mir-362,bta-mir-362,eca-mir-362,mml-mir-362,chi-mir-362,oar-mir-362,	mmu-mir-362	ctcgAATCCTTGGAACCTAGGTGTGAATgctgcttcagtgcAACACACCTGTTCAAGGATTCAaa	mmu-miR-362-3p	AACACACCTGTTCAAGGATTCA	3'	Diff	gp1a	((((......))))((((..(((((.(((((((((((...((((((((..(((.((....))))).)))))))))))))))))))..)))))..))))	84	52	-42.5	239	530	482	329	361	519	436.613	514.779	525.771	273.539	295.257	394.395	middle
227	391	mmu-miR-363-3p	AATTGCACGGTATCCATCTGTA	22	chrX	-	52741684	52741775	tgttttgctgttatcaggtggaacacgatgcaattttggttggtgtaataggaggaaAATTGCACGGTATCCATCTGTAaaccgcaggacct	18	mmu-mir-363,rno-mir-363,cpo-mir-363,hsa-mir-363,eca-mir-363,mdo-mir-363,ppy-mir-363,mml-mir-363,cfa-mir-363,ssc-mir-363-2,ssc-mir-363-1,pal-mir-363,dno-mir-363,tch-mir-363,ocu-mir-363,aca-mir-363,cli-mir-363,tgu-mir-363,	mmu-mir-363	tgttatCAGGTGGAACACGATGCAATTTtggttggtgtaataggaggaaAATTGCACGGTATCCATCTGTAaacc	mmu-miR-363-3p	AATTGCACGGTATCCATCTGTA	3'	Yes	gp1a	.((..(((.(((..((((((((((.((.(((((((((..((..........))..))))))))))))).))))))))..))).)))..))..	89	43.5	-31.1	9	24	0	20	13	12	16.4415	23.3107	0	16.6285	10.6325	9.11897	middle
228	392	mmu-miR-365-2-5p	AGGGACTTTCAGGGGCAGCTGTG	23	chr11	+	79726400	79726511	agagtgatcaaggacagcaagaaaaatgAGGGACTTTCAGGGGCAGCTGTGtttcctgactcagtcaTAATGCCCCTAAAAATCCTTATtgttcttgcagtgtgcatcggag	32	mmu-mir-365-2,rno-mir-365,cpo-mir-365-2,pal-mir-365b,dno-mir-365-2,oga-mir-365-2,cgr-mir-365-2,hsa-mir-365b,ppy-mir-365-2,cfa-mir-365-2,bta-mir-365-2,chi-mir-365,eca-mir-365-1,ptr-mir-365-2,mml-mir-365-2,cja-mir-365-2,efu-mir-365-2,ssc-mir-365-2,ocu-mir-365-2,tch-mir-365b,nle-mir-365-2,mmr-mir-365-2,gga-mir-365-2,oni-mir-365,gmo-mir-365,dre-mir-365-3,dre-mir-365-2,aca-mir-365,cli-mir-365-2,ccr-mi…	mmu-mir-365-2	agagtgatcaaggacagcaagaaaaatgAGGGACTTTCAGGGGCAGCTGTGtttcctgactcagtcaTAATGCCCCTAAAAATCCTTATtgttcttgcagtgtgcatcggag	mmu-miR-365-2-5p	AGGGACTTTCAGGGGCAGCTGTG	5'	Yes	gp1a	....((((((...((.(((((((.((((((((..(((.(((((((((((.(((....))).)))).....))))))))))..)))))))).))))))).)).)).))))...	105	45.5	-39.1	36	76	108	58	34	143	65.766	73.8174	117.808	48.2226	27.8081	108.668	middle
228	393	mmu-miR-365-3p	TAATGCCCCTAAAAATCCTTAT	22	chr11	+	79726400	79726511	agagtgatcaaggacagcaagaaaaatgAGGGACTTTCAGGGGCAGCTGTGtttcctgactcagtcaTAATGCCCCTAAAAATCCTTATtgttcttgcagtgtgcatcggag	32	mmu-mir-365-2,rno-mir-365,cpo-mir-365-2,pal-mir-365b,dno-mir-365-2,oga-mir-365-2,cgr-mir-365-2,hsa-mir-365b,ppy-mir-365-2,cfa-mir-365-2,bta-mir-365-2,chi-mir-365,eca-mir-365-1,ptr-mir-365-2,mml-mir-365-2,cja-mir-365-2,efu-mir-365-2,ssc-mir-365-2,ocu-mir-365-2,tch-mir-365b,nle-mir-365-2,mmr-mir-365-2,gga-mir-365-2,oni-mir-365,gmo-mir-365,dre-mir-365-3,dre-mir-365-2,aca-mir-365,cli-mir-365-2,ccr-mi…	mmu-mir-365-2	agagtgatcaaggacagcaagaaaaatgAGGGACTTTCAGGGGCAGCTGTGtttcctgactcagtcaTAATGCCCCTAAAAATCCTTATtgttcttgcagtgtgcatcggag	mmu-miR-365-3p	TAATGCCCCTAAAAATCCTTAT	3'	Yes	gp1a	....((((((...((.(((((((.((((((((..(((.(((((((((((.(((....))).)))).....))))))))))..)))))))).))))))).)).)).))))...	105	45.5	-39.1	983	1528.5	1705.5	3971.5	5456.5	4594.5	1795.78	1484.6	1860.38	3302	4462.79	3491.43	middle
229	394	mmu-miR-365-1-5p	AGGGACTTTTGGGGGCAGATGTG	23	chr16	+	13453825	13453935	gccagctgattggttaccgcagggaaaatgAGGGACTTTTGGGGGCAGATGTGtttccattccgctatcaTAATGCCCCTAAAAATCCTTATtgctcttgcagtattcctc	27	mmu-mir-365-1,cpo-mir-365-1,dno-mir-365-1,oga-mir-365-1,cgr-mir-365,hsa-mir-365a,eca-mir-365-2,ppy-mir-365-1,mml-mir-365-1,cfa-mir-365-1,bta-mir-365-1,ptr-mir-365-1,mdo-mir-365,cja-mir-365-1,efu-mir-365-1,ssc-mir-365-1,ggo-mir-365a,ocu-mir-365-1,tch-mir-365a-1,tch-mir-365a-2,nle-mir-365-1,mmr-mir-365-1,gga-mir-365-1,dre-mir-365-1,cli-mir-365-1,tgu-mir-365-1,xtr-mir-365-1,	mmu-mir-365-1	accgcagggaaaatgAGGGACTTTTGGGGGCAGATGTGtttccattccgctatcaTAATGCCCCTAAAAATCCTTATtgctcttgca	mmu-miR-365-1-5p	AGGGACTTTTGGGGGCAGATGTG	5'	Yes	gp1a	(((((....)))))(((.((((((..((((((((..(((((((((((..((((...............)))).))))))))))).))))))))..)))))).)))......	91	46.8	-39.1	14	31	16	0	16	31	25.5757	30.1097	17.453	0	13.0862	23.5573	middle
229	395	mmu-miR-365-3p	TAATGCCCCTAAAAATCCTTAT	22	chr16	+	13453825	13453935	gccagctgattggttaccgcagggaaaatgAGGGACTTTTGGGGGCAGATGTGtttccattccgctatcaTAATGCCCCTAAAAATCCTTATtgctcttgcagtattcctc	27	mmu-mir-365-1,cpo-mir-365-1,dno-mir-365-1,oga-mir-365-1,cgr-mir-365,hsa-mir-365a,eca-mir-365-2,ppy-mir-365-1,mml-mir-365-1,cfa-mir-365-1,bta-mir-365-1,ptr-mir-365-1,mdo-mir-365,cja-mir-365-1,efu-mir-365-1,ssc-mir-365-1,ggo-mir-365a,ocu-mir-365-1,tch-mir-365a-1,tch-mir-365a-2,nle-mir-365-1,mmr-mir-365-1,gga-mir-365-1,dre-mir-365-1,cli-mir-365-1,tgu-mir-365-1,xtr-mir-365-1,	mmu-mir-365-1	accgcagggaaaatgAGGGACTTTTGGGGGCAGATGTGtttccattccgctatcaTAATGCCCCTAAAAATCCTTATtgctcttgca	mmu-miR-365-3p	TAATGCCCCTAAAAATCCTTAT	3'	Yes	gp1a	(((((....)))))(((.((((((..((((((((..(((((((((((..((((...............)))).))))))))))).))))))))..)))))).)))......	91	46.8	-39.1	983	1528.5	1705.5	3971.5	5456.5	4594.5	1795.78	1484.6	1860.38	3302	4462.79	3491.43	middle
230	396	mmu-miR-369-5p	AGATCGACCGTGTTATATTCGC	22	chr12	+	109743411	109743512	ctctgctggtacttgaagggAGATCGACCGTGTTATATTCGCttggctgacttcgAATAATACATGGTTGATCTTTtctcagtatcaacgctcagcttggag	18	mmu-mir-369,rno-mir-369,cpo-mir-369,cgr-mir-369,hsa-mir-369,ppy-mir-369,mml-mir-369,bta-mir-369,ptr-mir-369,eca-mir-369,cja-mir-369,ggo-mir-369,pal-mir-369,tch-mir-369,ppa-mir-369,dno-mir-369,chi-mir-369,oar-mir-369,	mmu-mir-369	ggtacttgaagggAGATCGACCGTGTTATATTCGCttggctgacttcgAATAATACATGGTTGATCTTTtctcagtatc	mmu-miR-369-5p	AGATCGACCGTGTTATATTCGC	5'	Yes	gp1a	((((((((((((.((.((..(((((((((((((..((((((...((....)).))))))..)))))))))))).)..)))))))).......))))..))))	102	45.1	-34.2	96	160	64	114	217	178	175.376	155.405	69.8119	94.7824	177.481	135.265	middle
230	397	mmu-miR-369-3p	AATAATACATGGTTGATCTTT	21	chr12	+	109743411	109743512	ctctgctggtacttgaagggAGATCGACCGTGTTATATTCGCttggctgacttcgAATAATACATGGTTGATCTTTtctcagtatcaacgctcagcttggag	18	mmu-mir-369,rno-mir-369,cpo-mir-369,cgr-mir-369,hsa-mir-369,ppy-mir-369,mml-mir-369,bta-mir-369,ptr-mir-369,eca-mir-369,cja-mir-369,ggo-mir-369,pal-mir-369,tch-mir-369,ppa-mir-369,dno-mir-369,chi-mir-369,oar-mir-369,	mmu-mir-369	ggtacttgaagggAGATCGACCGTGTTATATTCGCttggctgacttcgAATAATACATGGTTGATCTTTtctcagtatc	mmu-miR-369-3p	AATAATACATGGTTGATCTTT	3'	Yes	gp1a	((((((((((((.((.((..(((((((((((((..((((((...((....)).))))))..)))))))))))).)..)))))))).......))))..))))	102	45.1	-34.2	101	350	159	175	343	341	184.51	339.948	173.439	145.499	280.535	259.131	middle
231	398	mmu-mir-370-p5	AGACCAGGTCACGTCTCTGCAGT	23	chr12	+	109618258	109618336	agacggagAGACCAGGTCACGTCTCTGCAGTtacacagctcatgagtGCCTGCTGGGGTGGAACCTGGTttgtctgtct	15	mmu-mir-370,rno-mir-370,cpo-mir-370,hsa-mir-370,ppy-mir-370,bta-mir-370,eca-mir-370,ptr-mir-370,mml-mir-370,cfa-mir-370,efu-mir-370,ssc-mir-370,pal-mir-370,ocu-mir-370,ppa-mir-370,	mmu-mir-370	agacggagagacCAGGTCACGTCTCTGCAGTTacacagctcatgagtGCCTGCTGGGGTGGAACCTGGTttgtctgtct	mmu-mir-370-p5	agacCAGGTCACGTCTCTGCAGT	5'	New	gp1a	(((((((.(((((((((..(..(((.((((..((.((.....)).))..)))).)))..)..))))))))).)))))))	79	55.7	-42.1	0	12	18	32	19	33	0	11.6554	19.6346	26.6056	15.5398	25.0772	middle
231	399	mmu-miR-370-3p	GCCTGCTGGGGTGGAACCTGGT	22	chr12	+	109618258	109618336	agacggagAGACCAGGTCACGTCTCTGCAGTtacacagctcatgagtGCCTGCTGGGGTGGAACCTGGTttgtctgtct	15	mmu-mir-370,rno-mir-370,cpo-mir-370,hsa-mir-370,ppy-mir-370,bta-mir-370,eca-mir-370,ptr-mir-370,mml-mir-370,cfa-mir-370,efu-mir-370,ssc-mir-370,pal-mir-370,ocu-mir-370,ppa-mir-370,	mmu-mir-370	agacggagagacCAGGTCACGTCTCTGCAGTTacacagctcatgagtGCCTGCTGGGGTGGAACCTGGTttgtctgtct	mmu-miR-370-3p	GCCTGCTGGGGTGGAACCTGGT	3'	Yes	gp1a	(((((((.(((((((((..(..(((.((((..((.((.....)).))..)))).)))..)..))))))))).)))))))	79	55.7	-42.1	928	3527	2882	3590	2430	3834	1695.3	3425.71	3143.72	2984.81	1987.46	2913.51	middle
232	400	mmu-miR-374c-5p_L+2R-1	ATATAATACAACCTGCTAAGT	21	chrX	-	103573058	103573154	gaagaaatcctactcgggtggATATAATACAACCTGCTAAGTgttctagcaCTTAGCAGGTTGTATTATCATTgtccgaggttatggctctcgtcta	14	mmu-mir-374b,rno-mir-374,cgr-mir-374,hsa-mir-374b,mml-mir-374b,bta-mir-374b,oar-mir-374b,eca-mir-374b,ptr-mir-374b,cja-mir-374b,ssc-mir-374b,ggo-mir-374b,ocu-mir-374b,chi-mir-374b,	mmu-mir-374b	gaagaaatcctactcgggtggatATAATACAACCTGCTAAGTGttctagcacttagcaGGTTGTATTATCATTGTCCGAGgttatggctctcgtc	mmu-miR-374c-5p	ATAATACAACCTGCTAAGTG	5'	Diff	gp1a	((.((...((..((((((..(..(((((((((((((((((((((....)))))))))))))))))))))..)..)))))).....))...)).))..	95	42.3	-46.9	561	1025	771	726	1534	735	1024.85	995.563	841.015	603.614	1254.64	558.537	middle
232	401	rno-miR-374-3p_2ss8CG19TC	CTTAGCAGGTTGTATTATCATT	22	chrX	-	103573058	103573154	gaagaaatcctactcgggtggATATAATACAACCTGCTAAGTgttctagcaCTTAGCAGGTTGTATTATCATTgtccgaggttatggctctcgtcta	14	mmu-mir-374b,rno-mir-374,cgr-mir-374,hsa-mir-374b,mml-mir-374b,bta-mir-374b,oar-mir-374b,eca-mir-374b,ptr-mir-374b,cja-mir-374b,ssc-mir-374b,ggo-mir-374b,ocu-mir-374b,chi-mir-374b,	rno-mir-374	ctcggatggATATAATACAACCTGCTAAGTGttctagcaCTTAGCACGTTGTATTATTATTgtccgag	rno-miR-374-3p	CTTAGCACGTTGTATTATTATT	3'	Diff	gp1a	((.((...((..((((((..(..(((((((((((((((((((((....)))))))))))))))))))))..)..)))))).....))...)).))..	95	42.3	-46.9	29	45	21	25	20	14	52.9781	43.7077	22.907	20.7856	16.3577	10.6388	middle
233	402	mmu-miR-375-3p	TTTGTTCGTTCGGCTCGCGTGA	22	chr1	-	74900641	74900749	ccgcccggccccgggtcttccgctccggccccgcgacgagcccctcgcacaaaccggacctgagcgtTTTGTTCGTTCGGCTCGCGTGAggcaggggcggcttctcagc	16	mmu-mir-375,hsa-mir-375,bta-mir-375,ppy-mir-375,mml-mir-375,rno-mir-375,cpo-mir-375,pal-mir-375,dno-mir-375,ocu-mir-375,ptr-mir-375,mdo-mir-375,cfa-mir-375,efu-mir-375,ssc-mir-375,ggo-mir-375,	mmu-mir-375	ccccGCGACGAGCCCCTCGCACAAACcggacctgagcgtTTTGTTCGTTCGGCTCGCGTGAggc	mmu-miR-375-3p	TTTGTTCGTTCGGCTCGCGTGA	3'	Yes	gp1a	..(((((....)))))...(((((((.(((.((((.((((((...((.(((((.((........)).))))).))...)))))))))).))).))))))).........	81	72.5	-54.1	14	7	5	37	24	14	25.5757	6.79897	5.45405	30.7627	19.6293	10.6388	middle
234	403	mmu-miR-376a-5p	GGTAGATTCTCCTTCTATGAGT	22	chr12	+	109723769	109723867	ttctttgatatttaaaaGGTAGATTCTCCTTCTATGAGTacaatattaatgactaATCGTAGAGGAAAATCCACGTtttcagtatcaaatgctgcttgg	13	mmu-mir-376a,rno-mir-376a,hsa-mir-376a-1,ppy-mir-376a-1,mml-mir-376a-1,bta-mir-376a,eca-mir-376a,ptr-mir-376a-1,cja-mir-376a-1,ssc-mir-376a,ggo-mir-376a,chi-mir-376a,oar-mir-376a,	mmu-mir-376a	taaaaGGTAGATTCTCCTTCTATGAGTacaatattaatgactaATCGTAGAGGAAAATCCACGTtttc	mmu-miR-376a-5p	GGTAGATTCTCCTTCTATGAGT	5'	Yes	gp1a	...(((((((((.((((.((.((((.((((.((((((...................)))))))))).)))).)).)))).)))))))))..........	86	32.3	-25.7	5	58	22	35	86	77	9.13416	56.3343	23.9978	29.0999	70.3382	58.5134	middle
234	404	mmu-miR-376a-3p	ATCGTAGAGGAAAATCCACGT	21	chr12	+	109723769	109723867	ttctttgatatttaaaaGGTAGATTCTCCTTCTATGAGTacaatattaatgactaATCGTAGAGGAAAATCCACGTtttcagtatcaaatgctgcttgg	13	mmu-mir-376a,rno-mir-376a,hsa-mir-376a-1,ppy-mir-376a-1,mml-mir-376a-1,bta-mir-376a,eca-mir-376a,ptr-mir-376a-1,cja-mir-376a-1,ssc-mir-376a,ggo-mir-376a,chi-mir-376a,oar-mir-376a,	mmu-mir-376a	taaaaGGTAGATTCTCCTTCTATGAGTacaatattaatgactaATCGTAGAGGAAAATCCACGTtttc	mmu-miR-376a-3p	ATCGTAGAGGAAAATCCACGT	3'	Yes	gp1a	...(((((((((.((((.((.((((.((((.((((((...................)))))))))).)))).)).)))).)))))))))..........	86	32.3	-25.7	22	64	12	23	22	48	40.1903	62.162	13.0897	19.1228	17.9935	36.4759	middle
235	405	mmu-miR-376b-5p_R-1	GTGGATATTCCTTCTATGGTT	21	chr12	+	109723456	109723541	tttggtatttaaaagGTGGATATTCCTTCTATGGTTacgtgcttcctggataATCATAGAGGAACATCCACTTtttcagtatcaaa	2	mmu-mir-376b,rno-mir-376b,	mmu-mir-376b	tggtatttaaaagGTGGATATTCCTTCTATGGTTAcgtgcttcctggataATCATAGAGGAACATCCACTTtttcagtatca	mmu-miR-376b-5p	GTGGATATTCCTTCTATGGTTA	5'	Diff	gp1a	(((((((((.(((((((((((.(((((.(((((((((.............)))))))))))))).))))))))))).)))))))))	86	34.9	-35	43	62	53	26	143	86	78.5538	60.2194	57.8129	21.617	116.958	65.3526	middle
235	406	mmu-miR-376b-3p	ATCATAGAGGAACATCCACTT	21	chr12	+	109723456	109723541	tttggtatttaaaagGTGGATATTCCTTCTATGGTTacgtgcttcctggataATCATAGAGGAACATCCACTTtttcagtatcaaa	2	mmu-mir-376b,rno-mir-376b,	mmu-mir-376b	tggtatttaaaagGTGGATATTCCTTCTATGGTTAcgtgcttcctggataATCATAGAGGAACATCCACTTtttcagtatca	mmu-miR-376b-3p	ATCATAGAGGAACATCCACTT	3'	Yes	gp1a	(((((((((.(((((((((((.(((((.(((((((((.............)))))))))))))).))))))))))).)))))))))	86	34.9	-35	123	422	188	161	340	376	224.7	409.881	205.072	133.859	278.081	285.728	middle
236	407	mmu-miR-376c-3p	AACATAGAGGAAATTTCACGT	21	chr12	+	109722718	109722803	tttggtatttaaaaggtggatattccttctatgtttatgctttttgtgattaAACATAGAGGAAATTTCACGTtttcagtgtcaaa	2	mmu-mir-376c,rno-mir-376c,	mmu-mir-376c	tttggtatttaaaagGTGGATATTCCTTCTATGTTTAtgctttttgtgattaAACATAGAGGAAATTTCACGTtttcagtgtcaaa	mmu-miR-376c-3p	AACATAGAGGAAATTTCACGT	3'	Yes	gp1a	((((..(((.((((.(((((..((((.((((((((((.((.....))...))))))))))))))..))))).)))).)))..))))	86	29.1	-28	94	338	211	155	385	392	171.722	328.293	230.161	128.871	314.886	297.886	middle
237	408	mmu-miR-377-5p	AGAGGTTGCCCTTGGTGAATTC	22	chr12	+	109740492	109740591	gtgctgacgtttgattcttgagcAGAGGTTGCCCTTGGTGAATTCgctttattgatgtTGAATCACACAAAGGCAACTTTTgtttgagtatcaaagcctg	15	mmu-mir-377,rno-mir-377,cpo-mir-377,cgr-mir-377,hsa-mir-377,bta-mir-377,eca-mir-377,ppy-mir-377,mml-mir-377,cfa-mir-377,ptr-mir-377,cja-mir-377,ggo-mir-377,pal-mir-377,ocu-mir-377,	mmu-mir-377	tgagcAGAGGTTGCCCTTGGTGAATTCgctttattgatgttgaATCACACAAAGGCAACTTTTGTttg	mmu-miR-377-5p	AGAGGTTGCCCTTGGTGAATTC	5'	Yes	gp1a	..(((.....(((((.((..(((((((((((((.(((((((.(((((.........).)))))))).))).)))))))))))))..)).))))))))...	95	42	-37.8	59	123	117	194	316	337	107.783	119.468	127.625	161.296	258.452	256.091	middle
237	409	mmu-miR-377-3p_L+3R-2	TGAATCACACAAAGGCAACTTTT	23	chr12	+	109740492	109740591	gtgctgacgtttgattcttgagcAGAGGTTGCCCTTGGTGAATTCgctttattgatgtTGAATCACACAAAGGCAACTTTTgtttgagtatcaaagcctg	15	mmu-mir-377,rno-mir-377,cpo-mir-377,cgr-mir-377,hsa-mir-377,bta-mir-377,eca-mir-377,ppy-mir-377,mml-mir-377,cfa-mir-377,ptr-mir-377,cja-mir-377,ggo-mir-377,pal-mir-377,ocu-mir-377,	mmu-mir-377	tgagcAGAGGTTGCCCTTGGTGAATTCgctttattgatgttgaATCACACAAAGGCAACTTTTGTttg	mmu-miR-377-3p	ATCACACAAAGGCAACTTTTGT	3'	Diff	gp1a	..(((.....(((((.((..(((((((((((((.(((((((.(((((.........).)))))))).))).)))))))))))))..)).))))))))...	95	42	-37.8	110	277	166	154	262	406	200.952	269.045	181.074	128.039	214.286	308.525	middle
238	410	mmu-miR-378d_1ss6CA	ACTGGACTTGGAGTCAGAAGGT	22	chr10	-	126710282	126710391	agatgctgggatagcACTGGCCTTGGAGTCAGAAGGTttgtgatttggtggcagctctgccatccaatatccctgtgatttttagggtgtcagtttccctttaagcaccg	1	mmu-mir-378d,	mmu-mir-378d	agatgctgggatagcACTGGCCTTGGAGTCAGAAGGTttgtgatttggtggcagctctgccatccaatatccctgtgatttttagggtgtcagtttccctttaagcaccg	mmu-miR-378d	ACTGGCCTTGGAGTCAGAAGGT	5'	Diff	gp1a	.......((((((.(((..(((((........)))))..)))..(((((((((....))))).)))))))))).(((.(((..((((.........))))..))))))..	28	49.1	-36.3	295.5	537	588.5	954.5	629.5	694	539.829	521.578	641.942	793.595	514.859	527.38	middle
239	411	mmu-miR-378a-5p	CTCCTGACTCCAGGTCCTGTGT	22	chr18	-	61397817	61397925	cagccagggggtgacagagccacccagggCTCCTGACTCCAGGTCCTGTGTgttacctcgaaatagcACTGGACTTGGAGTCAGAAGGCctgagtggagtcaccttccc	23	mmu-mir-378a,bta-mir-378-1,eca-mir-378,mml-mir-378a,rno-mir-378a,cpo-mir-378,cja-mir-378,cfa-mir-378,ocu-mir-378,tch-mir-378a,cgr-mir-378,hsa-mir-378a,ptr-mir-378a,ppy-mir-378a,efu-mir-378,ssc-mir-378-1,ggo-mir-378a,pal-mir-378,dno-mir-378,oga-mir-378,chi-mir-378,ppa-mir-378a,nle-mir-378a,	mmu-mir-378a	agggCTCCTGACTCCAGGTCCTGTGTgttacctcgaaatagcACTGGACTTGGAGTCAGAAGGcct	mmu-miR-378a-5p	CTCCTGACTCCAGGTCCTGTGT	5'	Yes	gp1a	......(..((((((....((((.((((.((.((((((((((((((...((((((........)))))).)))))))))))))).)).)))).)))).))))))..)..	101	59.6	-61.7	248	437	925	1043	951	1094	453.054	424.45	1009	867.176	777.809	831.346	middle
239	412	mmu-miR-378a-3p_R+1	ACTGGACTTGGAGTCAGAAGGC	22	chr18	-	61397817	61397925	cagccagggggtgacagagccacccagggCTCCTGACTCCAGGTCCTGTGTgttacctcgaaatagcACTGGACTTGGAGTCAGAAGGCctgagtggagtcaccttccc	23	mmu-mir-378a,bta-mir-378-1,eca-mir-378,mml-mir-378a,rno-mir-378a,cpo-mir-378,cja-mir-378,cfa-mir-378,ocu-mir-378,tch-mir-378a,cgr-mir-378,hsa-mir-378a,ptr-mir-378a,ppy-mir-378a,efu-mir-378,ssc-mir-378-1,ggo-mir-378a,pal-mir-378,dno-mir-378,oga-mir-378,chi-mir-378,ppa-mir-378a,nle-mir-378a,	mmu-mir-378a	agggCTCCTGACTCCAGGTCCTGTGTgttacctcgaaatagcACTGGACTTGGAGTCAGAAGGcct	mmu-miR-378a-3p	ACTGGACTTGGAGTCAGAAGG	3'	Diff	gp1a	......(..((((((....((((.((((.((.((((((((((((((...((((((........)))))).)))))))))))))).)).)))).)))).))))))..)..	101	59.6	-61.7	16065.2	30142.5	36182.2	52995.7	24699.5	32165.7	29348.4	29276.8	39467.9	44061.9	20201.4	24443.1	high
240	413	mmu-miR-378c_R-1	ACTGGACTTGGAGTCAGAAG	20	chr14	-	46954830	46954928	tatACTGGACTTGGAGTCAGAAGccttgggtttgaggactgggctagcctctcattagttgggtgtgttaaacccaacatgtagtctatctgatctgga	1	mmu-mir-378c,	mmu-mir-378c	tatACTGGACTTGGAGTCAGAAGCcttgggtttgaggactgggctagcctctcattagttgggtgtgttaaacccaacatgtagtctatctgatctgga	mmu-miR-378c	ACTGGACTTGGAGTCAGAAGC	5'	Diff	gp1a	.....((((((..(((.....(((((..((((....))))))))).....)))....(((((((.......)))))))....))))))...........	40	46.5	-28.1	447.667	959.5	927.667	1177.17	667	791.667	817.812	931.944	1011.91	978.725	545.53	601.599	middle
241	414	mmu-miR-378b_R-1	CTGGACTTGGAGTCAGAAG	19	chr11	+	88352773	88352864	tgtcctgggctatcccagtccaggcagtaccctcaggaggcaggtacgatggatagagagggaaccCTGGACTTGGAGTCAGAAGacctgag	1	mmu-mir-378b,	mmu-mir-378b	tgtcctgggctatcccagtccaggcagtaccctcaggaggcaggtacgatggatagagagggaaccCTGGACTTGGAGTCAGAAGAcctgag	mmu-miR-378b	CTGGACTTGGAGTCAGAAGA	3'	Diff	gp1a	.(((...(((..(((.((((((((..((.(((((......((.......))......))))).)))))))))).))))))....))).....	86	57.6	-30.6	8.66667	16	14.6667	14.6667	17	12.6667	15.8325	15.5405	15.9986	12.1942	13.9041	9.62558	middle
242	415	mmu-miR-379-5p	TGGTAGACTATGGAACGTAGG	21	chr12	+	109709027	109709151	ttctaggggtcaacaccgttccatggttcctgaagagaTGGTAGACTATGGAACGTAGGcgttatgtttttgaccTATGTAACATGGTCCACTAACtctcagtatccaatccatcctcggagggc	20	mmu-mir-379,rno-mir-379,cpo-mir-379,cgr-mir-379,hsa-mir-379,bta-mir-379,eca-mir-379,ptr-mir-379,ppy-mir-379,mml-mir-379,cja-mir-379,cfa-mir-379,pal-mir-379,dno-mir-379,efu-mir-379,ggo-mir-379,ocu-mir-379,ppa-mir-379,chi-mir-379,oar-mir-379,	mmu-mir-379	agagaTGGTAGACTATGGAACGTAGGcgttatgtttttgaccTATGTAACATGGTCCACTAACTct	mmu-miR-379-5p	TGGTAGACTATGGAACGTAGG	5'	Yes	gp1a	(((..(((((....(((((...)))))..(((.((((.((((.(((((((..(((((((((.........)).)))))))..))))))).)))).)))))))..........)))))..)))...	73	47.2	-42.1	6101	24615	10734	23841	22678	23587	11145.5	23908.1	11708.8	19822	18548	17924.1	high
242	416	mmu-miR-379-3p_R-1	TATGTAACATGGTCCACTAAC	21	chr12	+	109709027	109709151	ttctaggggtcaacaccgttccatggttcctgaagagaTGGTAGACTATGGAACGTAGGcgttatgtttttgaccTATGTAACATGGTCCACTAACtctcagtatccaatccatcctcggagggc	20	mmu-mir-379,rno-mir-379,cpo-mir-379,cgr-mir-379,hsa-mir-379,bta-mir-379,eca-mir-379,ptr-mir-379,ppy-mir-379,mml-mir-379,cja-mir-379,cfa-mir-379,pal-mir-379,dno-mir-379,efu-mir-379,ggo-mir-379,ocu-mir-379,ppa-mir-379,chi-mir-379,oar-mir-379,	mmu-mir-379	agagaTGGTAGACTATGGAACGTAGGcgttatgtttttgaccTATGTAACATGGTCCACTAACTct	mmu-miR-379-3p	TATGTAACATGGTCCACTAACT	3'	Diff	gp1a	(((..(((((....(((((...)))))..(((.((((.((((.(((((((..(((((((((.........)).)))))))..))))))).)))).)))))))..........)))))..)))...	73	47.2	-42.1	161	488	158.5	333	689.5	430	294.12	473.985	172.893	276.864	563.932	326.763	middle
243	417	mmu-miR-380-5p	ATGGTTGACCATAGAACATGCG	22	chr12	+	109711796	109711872	acctgaaaagATGGTTGACCATAGAACATGCGctacttctgtgtcgTATGTAGTATGGTCCACATCTtctcgttatc	7	mmu-mir-380,rno-mir-380,hsa-mir-380,bta-mir-380,ptr-mir-380,ppy-mir-380,mml-mir-380,	mmu-mir-380	aagATGGTTGACCATAGAACATGCGctacttctgtgtcgTATGTAGTATGGTCCACATCTT	mmu-miR-380-5p	ATGGTTGACCATAGAACATGCG	5'	Yes	gp1a	...(((.((((((...(((((((..(((((((..((....))..)))))))..)))))))..)))))).))).....	69	42.9	-28.6	71	172	77	129	150	191	129.705	167.06	83.9924	107.254	122.683	145.144	middle
243	418	mmu-miR-380-3p_R-1	TATGTAGTATGGTCCACATCT	21	chr12	+	109711796	109711872	acctgaaaagATGGTTGACCATAGAACATGCGctacttctgtgtcgTATGTAGTATGGTCCACATCTtctcgttatc	7	mmu-mir-380,rno-mir-380,hsa-mir-380,bta-mir-380,ptr-mir-380,ppy-mir-380,mml-mir-380,	mmu-mir-380	aagATGGTTGACCATAGAACATGCGctacttctgtgtcgTATGTAGTATGGTCCACATCTT	mmu-miR-380-3p	TATGTAGTATGGTCCACATCTT	3'	Diff	gp1a	...(((.((((((...(((((((..(((((((..((....))..)))))))..)))))))..)))))).))).....	69	42.9	-28.6	117	212	56	180	271	289	213.739	205.912	61.0854	149.656	221.647	219.615	middle
244	419	mmu-miR-381-5p	AGCGAGGTTGCCCTTTGTATATT	23	chr12	+	109726799	109726905	acctgccccatgctattgtttggtacttaaAGCGAGGTTGCCCTTTGTATATTcggtttattgacatggaaTATACAAGGGCAAGCTCTCTGTgagtatcaaacctt	23	mmu-mir-381,hsa-mir-381,ppy-mir-381,mml-mir-381,rno-mir-381,cpo-mir-381,cgr-mir-381,bta-mir-381,eca-mir-381,cfa-mir-381,ptr-mir-381,cja-mir-381,efu-mir-381,ssc-mir-381,ggo-mir-381,pal-mir-381,dno-mir-381,chi-mir-381,ppa-mir-381,nle-mir-381,oga-mir-381,mmr-mir-381,dma-mir-381,	mmu-mir-381	tacttaaAGCGAGGTTGCCCTTTGTATATTcggtttattgacatggaaTATACAAGGGCAAGCTCTCTGTgagta	mmu-miR-381-5p	AGCGAGGTTGCCCTTTGTATATT	5'	Yes	gp1a	.................((((((((((((.((.(((.((((((((.((((((((.(((....)))...)))))))))))))))).))).)).))))))))))))...	87	42.1	-44.2	0	0	10	12	22	5	0	0	10.9081	9.97709	17.9935	3.79957	middle
244	420	mmu-miR-381-3p	TATACAAGGGCAAGCTCTCTGT	22	chr12	+	109726799	109726905	acctgccccatgctattgtttggtacttaaAGCGAGGTTGCCCTTTGTATATTcggtttattgacatggaaTATACAAGGGCAAGCTCTCTGTgagtatcaaacctt	23	mmu-mir-381,hsa-mir-381,ppy-mir-381,mml-mir-381,rno-mir-381,cpo-mir-381,cgr-mir-381,bta-mir-381,eca-mir-381,cfa-mir-381,ptr-mir-381,cja-mir-381,efu-mir-381,ssc-mir-381,ggo-mir-381,pal-mir-381,dno-mir-381,chi-mir-381,ppa-mir-381,nle-mir-381,oga-mir-381,mmr-mir-381,dma-mir-381,	mmu-mir-381	tacttaaAGCGAGGTTGCCCTTTGTATATTcggtttattgacatggaaTATACAAGGGCAAGCTCTCTGTgagta	mmu-miR-381-3p	TATACAAGGGCAAGCTCTCTGT	3'	Yes	gp1a	.................((((((((((((.((.(((.((((((((.((((((((.(((....)))...)))))))))))))))).))).)).))))))))))))...	87	42.1	-44.2	226	530	397	446	548	503	412.864	514.779	433.052	370.815	448.201	382.237	middle
245	421	mmu-miR-382-5p	GAAGTTGTTCGTGGTGGATTCG	22	chr12	+	109733745	109733864	tctgtcttgtctctgcttttctgtggtacttgaagaGAAGTTGTTCGTGGTGGATTCGctttacttgtgacgAATCATTCACGGACAACACTTTtttcagtaccaaatgctacctctaag	21	mmu-mir-382,rno-mir-382,cpo-mir-382,dno-mir-382,ocu-mir-382,cgr-mir-382,hsa-mir-382,bta-mir-382,eca-mir-382,mml-mir-382,ptr-mir-382,ppy-mir-382,cja-mir-382,cfa-mir-382,efu-mir-382,ssc-mir-382,ggo-mir-382,ppa-mir-382,pal-mir-382,chi-mir-382,oar-mir-382,	mmu-mir-382	tacttgaagaGAAGTTGTTCGTGGTGGATTCGctttacttgtgacgaaTCATTCACGGACAACACTTTTTtcagta	mmu-miR-382-5p	GAAGTTGTTCGTGGTGGATTCG	5'	Yes	gp1a	..............((.......((((((.((((((((.(((((((((((..((((((..(((....)))))))))..)))))))))))..))))))))))))))...))..........	96	41.7	-37.5	1107	4104	1735	5150	4753	4845	2022.3	3986.14	1892.56	4281.84	3887.41	3681.78	middle
245	422	mmu-miR-382-3p_L+2R-2	AATCATTCACGGACAACACTTT	22	chr12	+	109733745	109733864	tctgtcttgtctctgcttttctgtggtacttgaagaGAAGTTGTTCGTGGTGGATTCGctttacttgtgacgAATCATTCACGGACAACACTTTtttcagtaccaaatgctacctctaag	21	mmu-mir-382,rno-mir-382,cpo-mir-382,dno-mir-382,ocu-mir-382,cgr-mir-382,hsa-mir-382,bta-mir-382,eca-mir-382,mml-mir-382,ptr-mir-382,ppy-mir-382,cja-mir-382,cfa-mir-382,efu-mir-382,ssc-mir-382,ggo-mir-382,ppa-mir-382,pal-mir-382,chi-mir-382,oar-mir-382,	mmu-mir-382	tacttgaagaGAAGTTGTTCGTGGTGGATTCGctttacttgtgacgaaTCATTCACGGACAACACTTTTTtcagta	mmu-miR-382-3p	TCATTCACGGACAACACTTTTT	3'	Diff	gp1a	..............((.......((((((.((((((((.(((((((((((..((((((..(((....)))))))))..)))))))))))..))))))))))))))...))..........	96	41.7	-37.5	157	705	370	474	632	649	286.813	684.753	403.6	394.095	516.904	493.184	middle
246	423	mmu-miR-383-5p	AGATCAGAAGGTGACTGTGGCT	22	chr8	-	38252109	38252219	ctccacgtcacctgctcctcAGATCAGAAGGTGACTGTGGCTttgggtggatattaatcagccacagcactgcctggtcagaaagagcaagtgtcctagccttttacctca	19	mmu-mir-383,rno-mir-383,hsa-mir-383,eca-mir-383,ppy-mir-383,mml-mir-383,bta-mir-383,ptr-mir-383,cja-mir-383a,cfa-mir-383,pal-mir-383,ssc-mir-383,ggo-mir-383,chi-mir-383,dno-mir-383,ocu-mir-383,gga-mir-383,aca-mir-383,xtr-mir-383,	mmu-mir-383	ctcAGATCAGAAGGTGACTGTGGCTttgggtggatattaatcagCCACAGCACTGCCTGGTCAGAaagag	mmu-miR-383-5p	AGATCAGAAGGTGACTGTGGCT	5'	Yes	gp1a	........(((.(((((.((.((((((..((((.((((((((...(((........)))))))))))))))..)))))).))..))))).)))..................	85	51.4	-39.1	15	38	7	25	21	26	27.4025	36.9087	7.63567	20.7856	17.1756	19.7578	middle
247	424	mmu-miR-384-3p	ATTCCTAGAAATTGTTCACAAT	22	chrX	-	105344282	105344369	tgttaaatcaggaattgtaaacaattcctaggcaatgtgtataatgttggtaagtcATTCCTAGAAATTGTTCACAATgcctgtaaca	6	mmu-mir-384,rno-mir-384,cgr-mir-384,eca-mir-384,cfa-mir-384,ocu-mir-384,	mmu-mir-384	tgttaaatcaggaatTGTAAACAATTCCTAGGCAATGTgtataatgttggtaagtcATTCCTAGAAATTGTTCACAATgcctgtaaca	mmu-miR-384-3p	ATTCCTAGAAATTGTTCACAAT	3'	Yes	gp1a	.((((...((((.(((((.(((((((.(((((.((((..(((.......)))...))))))))).))))))).))))).)))))))).	86	33	-28.1	0	0	0	5	0	0	0	0	0	4.15712	0	0	low
248	425	mmu-miR-409-5p	AGGTTACCCGAGCAACTTTGCAT	23	chr12	+	109743150	109743255	cctctccgtggtactcggagagAGGTTACCCGAGCAACTTTGCATctggaggacGAATGTTGCTCGGTGAACCCCTtttcggtatcaaatccctccagggaggcca	24	mmu-mir-409,rno-mir-409a,cgr-mir-409,hsa-mir-409,eca-mir-409,ppy-mir-409,mml-mir-409,bta-mir-409a,ptr-mir-409,cja-mir-409,cfa-mir-409,efu-mir-409,ggo-mir-409,pal-mir-409,ocu-mir-409,tch-mir-409,ppa-mir-409,nle-mir-409,oga-mir-409,mmr-mir-409,dma-mir-409,dno-mir-409,chi-mir-409,oar-mir-409,	mmu-mir-409	tggtactcggagagAGGTTACCCGAGCAACTTTGCATctggaggacGAATGTTGCTCGGTGAACCCCTtttcggtatca	mmu-miR-409-5p	AGGTTACCCGAGCAACTTTGCAT	5'	Yes	gp1a	((((((..((((((.(((((((.((((..(((((((((((((..((.....)))))).)))))))))..)))).)))))))))))))..........))))))...	103	55.7	-44.9	778	2062	1037	2296	2861	2708	1421.28	2002.78	1131.17	1908.95	2339.97	2057.85	middle
248	426	mmu-miR-409-3p	GAATGTTGCTCGGTGAACCCCT	22	chr12	+	109743150	109743255	cctctccgtggtactcggagagAGGTTACCCGAGCAACTTTGCATctggaggacGAATGTTGCTCGGTGAACCCCTtttcggtatcaaatccctccagggaggcca	24	mmu-mir-409,rno-mir-409a,cgr-mir-409,hsa-mir-409,eca-mir-409,ppy-mir-409,mml-mir-409,bta-mir-409a,ptr-mir-409,cja-mir-409,cfa-mir-409,efu-mir-409,ggo-mir-409,pal-mir-409,ocu-mir-409,tch-mir-409,ppa-mir-409,nle-mir-409,oga-mir-409,mmr-mir-409,dma-mir-409,dno-mir-409,chi-mir-409,oar-mir-409,	mmu-mir-409	tggtactcggagagAGGTTACCCGAGCAACTTTGCATctggaggacGAATGTTGCTCGGTGAACCCCTtttcggtatca	mmu-miR-409-3p	GAATGTTGCTCGGTGAACCCCT	3'	Yes	gp1a	((((((..((((((.(((((((.((((..(((((((((((((..((.....)))))).)))))))))..)))).)))))))))))))..........))))))...	103	55.7	-44.9	786	1758	1009	2979	2827	3071	1435.89	1707.51	1100.63	2476.81	2312.16	2333.7	middle
249	427	mmu-miR-410-5p	AGGTTGTCTGTGATGAGTTCG	21	chr12	+	109743715	109743795	gggtacttgaggagAGGTTGTCTGTGATGAGTTCGctttattaatgacgAATATAACACAGATGGCCTGTtttcaatacca	18	mmu-mir-410,rno-mir-410,cpo-mir-410,pal-mir-410,oga-mir-410,mmr-mir-410,cgr-mir-410,hsa-mir-410,ppy-mir-410,bta-mir-410,eca-mir-410,ptr-mir-410,mml-mir-410,cja-mir-410,cfa-mir-410,dno-mir-410,ppa-mir-410,nle-mir-410,	mmu-mir-410	gggtacttgaggagAGGTTGTCTGTGATGAGTTCGctttattaatgacgAATATAACACAGATGGCCTGTtttcaatacca	mmu-miR-410-5p	AGGTTGTCTGTGATGAGTTCG	5'	Yes	gp1a	.((((.((((..(.((((..((((((.((..((((.((.......))))))..)).))))))..)))).)..)))))))).	79	40.7	-33.3	0	0	0	23	0	22	0	0	0	19.1228	0	16.7181	middle
249	428	mmu-miR-410-3p	AATATAACACAGATGGCCTGT	21	chr12	+	109743715	109743795	gggtacttgaggagAGGTTGTCTGTGATGAGTTCGctttattaatgacgAATATAACACAGATGGCCTGTtttcaatacca	18	mmu-mir-410,rno-mir-410,cpo-mir-410,pal-mir-410,oga-mir-410,mmr-mir-410,cgr-mir-410,hsa-mir-410,ppy-mir-410,bta-mir-410,eca-mir-410,ptr-mir-410,mml-mir-410,cja-mir-410,cfa-mir-410,dno-mir-410,ppa-mir-410,nle-mir-410,	mmu-mir-410	gggtacttgaggagAGGTTGTCTGTGATGAGTTCGctttattaatgacgAATATAACACAGATGGCCTGTtttcaatacca	mmu-miR-410-3p	AATATAACACAGATGGCCTGT	3'	Yes	gp1a	.((((.((((..(.((((..((((((.((..((((.((.......))))))..)).))))))..)))).)..)))))))).	79	40.7	-33.3	485	1319	710	1318	1726	1514	886.014	1281.12	774.475	1095.82	1411.67	1150.51	middle
250	429	mmu-miR-411-5p	TAGTAGACCGTATAGCGTACG	21	chr12	+	109710149	109710279	cagcctttgtcctcggcgtctctgtgtggtacttggagagaTAGTAGACCGTATAGCGTACGctttatctgtgacgTATGTAACACGGTCCACTAACcctcagtatcaaatccatccccgaggcccctgga	22	mmu-mir-411,bta-mir-411a,eca-mir-411,mml-mir-411,rno-mir-411,ssc-mir-411,cpo-mir-411,pal-mir-411,dno-mir-411,ocu-mir-411,oga-mir-411a,mmr-mir-411a,hsa-mir-411,ppy-mir-411,ptr-mir-411,cja-mir-411,cfa-mir-411,ggo-mir-411,chi-mir-411a,tch-mir-411,ppa-mir-411a,oar-mir-411a,	mmu-mir-411	tggtacttggagagaTAGTAGACCGTATAGCGTACGctttatctgtgacgTATGTAACACGGTCCACTAACCctcagtatca	mmu-miR-411-5p	TAGTAGACCGTATAGCGTACG	5'	Yes	gp1a	...((.....((((((..........(((((((..(((...((((.((((((...(((((((.((.......)))))))))...)))))).))))...)))))))))).........)))))).....)).	82	51.9	-41.5	1966	7409	3329	7184	10152	7830	3591.55	7196.22	3631.31	5972.95	8303.17	5950.13	high
250	430	mmu-miR-411-3p_R-1	TATGTAACACGGTCCACTAAC	21	chr12	+	109710149	109710279	cagcctttgtcctcggcgtctctgtgtggtacttggagagaTAGTAGACCGTATAGCGTACGctttatctgtgacgTATGTAACACGGTCCACTAACcctcagtatcaaatccatccccgaggcccctgga	22	mmu-mir-411,bta-mir-411a,eca-mir-411,mml-mir-411,rno-mir-411,ssc-mir-411,cpo-mir-411,pal-mir-411,dno-mir-411,ocu-mir-411,oga-mir-411a,mmr-mir-411a,hsa-mir-411,ppy-mir-411,ptr-mir-411,cja-mir-411,cfa-mir-411,ggo-mir-411,chi-mir-411a,tch-mir-411,ppa-mir-411a,oar-mir-411a,	mmu-mir-411	tggtacttggagagaTAGTAGACCGTATAGCGTACGctttatctgtgacgTATGTAACACGGTCCACTAACCctcagtatca	mmu-miR-411-3p	TATGTAACACGGTCCACTAACC	3'	Diff	gp1a	...((.....((((((..........(((((((..(((...((((.((((((...(((((((.((.......)))))))))...)))))).))))...)))))))))).........)))))).....)).	82	51.9	-41.5	413	1074	342.5	858	1753.5	999	754.482	1043.16	373.603	713.362	1434.16	759.154	middle
251	431	mmu-miR-412-5p	TGGTCGACCAGCTGGAAAGTAAT	23	chr12	+	109743286	109743375	ctggggtatgggacggaTGGTCGACCAGCTGGAAAGTAATtgtttctaatgtaCTTCACCTGGTCCACTAGCCGtcggtgcccgctgcag	7	mmu-mir-412,rno-mir-412,cgr-mir-412,hsa-mir-412,ppy-mir-412,mml-mir-412,ptr-mir-412,	mmu-mir-412	gggtatgggacggaTGGTCGACCAGCTGGAAAGTAATtgtttctaatgtacTTCACCTGGTCCACTAGCCGtcggtgccc	mmu-miR-412-5p	TGGTCGACCAGCTGGAAAGTAAT	5'	Yes	gp1a	...((((((..(((((.((((.((((((.(((..((((((((....)))).))))))).)))))).)))).))))).)))))).......	80	55.6	-34.8	7	54	38	85	53	98	12.7878	52.4492	41.4508	70.6711	43.3479	74.4716	middle
251	432	mmu-miR-412-3p_L+1	CTTCACCTGGTCCACTAGCCG	21	chr12	+	109743286	109743375	ctggggtatgggacggaTGGTCGACCAGCTGGAAAGTAATtgtttctaatgtaCTTCACCTGGTCCACTAGCCGtcggtgcccgctgcag	7	mmu-mir-412,rno-mir-412,cgr-mir-412,hsa-mir-412,ppy-mir-412,mml-mir-412,ptr-mir-412,	mmu-mir-412	gggtatgggacggaTGGTCGACCAGCTGGAAAGTAATtgtttctaatgtacTTCACCTGGTCCACTAGCCGtcggtgccc	mmu-miR-412-3p	TTCACCTGGTCCACTAGCCG	3'	Diff	gp1a	...((((((..(((((.((((.((((((.(((..((((((((....)))).))))))).)))))).)))).))))).)))))).......	80	55.6	-34.8	0	0	7	23	0	5	0	0	7.63567	19.1228	0	3.79957	middle
252	433	mmu-miR-421-3p	ATCAACAGACATTAATTGGGCGC	23	chrX	-	103572906	103573018	tcacagtgcctaatccggtgcacattgtaggcctcattaaatgtttgttgaatgaaaaaatgaatcATCAACAGACATTAATTGGGCGCctgctctgtgatctccatgggctc	18	mmu-mir-421,rno-mir-421,hsa-mir-421,bta-mir-421,eca-mir-421,mml-mir-421,ptr-mir-421,ppy-mir-421,cja-mir-421,cfa-mir-421,pal-mir-421,ppa-mir-421,oga-mir-421,ssc-mir-421,ggo-mir-421,ocu-mir-421,nle-mir-421,chi-mir-421,	mmu-mir-421	cattgtaggcCTCATTAAATGTTTGTTGAATgaaaaaatgaatcATCAACAGACATTAATTGGGCGCctgctctgt	mmu-miR-421-3p	ATCAACAGACATTAATTGGGCGC	3'	Yes	gp1a	.......(((((....(((.((((..((((((((((...((((((((((((.(((.........)))))))))))))))...)))).))))))..)))))))....)))))..	104	43.4	-43.4	292	426	357	862	411	592	533.435	413.766	389.419	716.688	336.151	449.869	middle
253	434	mmu-miR-423-5p	TGAGGGGCAGAGAGCGAGACTTT	23	chr11	-	77078033	77078209	gtacatttttccaggttgcaagcccgaagtttgagaaacttgtgaggaaataaaggaagttaggcTGAGGGGCAGAGAGCGAGACTTTtctattttccaaaAGCTCGGTCTGAGGCCCCTCAGTcttgcttcctaccccgcgcttgagtttctcccggttggatgcgctcaggggca	25	mmu-mir-423,rno-mir-423,efu-mir-423,cpo-mir-423,cfa-mir-423a,pal-mir-423,dno-mir-423,ocu-mir-423,tch-mir-423,ppa-mir-423,nle-mir-423,oga-mir-423,dma-mir-423,sbo-mir-423,cgr-mir-423,hsa-mir-423,bta-mir-423,mml-mir-423,eca-mir-423,ptr-mir-423,ppy-mir-423,cja-mir-423,ssc-mir-423,ggo-mir-423,chi-mir-423,	mmu-mir-423	acttgtgaggaaataaaggaagttaggcTGAGGGGCAGAGAGCGAGACTTTtctattttccaaaAGCTCGGTCTGAGGCCCCTCAGTcttgcttcctaccccgcgcttg	mmu-miR-423-5p	TGAGGGGCAGAGAGCGAGACTTT	5'	Yes	gp1a	.....((..((((((((.(((((.....)))))...)))))).))..))....((((((..((((((((((((..(((.((((.(((((.........))))))))).)))...))))))))))))..)))))).....((.(((((((...(((.....)))...))))))).)).	81	51.4	-74.8	4193	10322	15367	11650	7673	13993	7659.91	10025.6	16762.5	9686.09	6275.64	10633.5	high
253	435	mmu-miR-423-3p	AGCTCGGTCTGAGGCCCCTCAGT	23	chr11	-	77078033	77078209	gtacatttttccaggttgcaagcccgaagtttgagaaacttgtgaggaaataaaggaagttaggcTGAGGGGCAGAGAGCGAGACTTTtctattttccaaaAGCTCGGTCTGAGGCCCCTCAGTcttgcttcctaccccgcgcttgagtttctcccggttggatgcgctcaggggca	25	mmu-mir-423,rno-mir-423,efu-mir-423,cpo-mir-423,cfa-mir-423a,pal-mir-423,dno-mir-423,ocu-mir-423,tch-mir-423,ppa-mir-423,nle-mir-423,oga-mir-423,dma-mir-423,sbo-mir-423,cgr-mir-423,hsa-mir-423,bta-mir-423,mml-mir-423,eca-mir-423,ptr-mir-423,ppy-mir-423,cja-mir-423,ssc-mir-423,ggo-mir-423,chi-mir-423,	mmu-mir-423	acttgtgaggaaataaaggaagttaggcTGAGGGGCAGAGAGCGAGACTTTtctattttccaaaAGCTCGGTCTGAGGCCCCTCAGTcttgcttcctaccccgcgcttg	mmu-miR-423-3p	AGCTCGGTCTGAGGCCCCTCAGT	3'	Yes	gp1a	.....((..((((((((.(((((.....)))))...)))))).))..))....((((((..((((((((((((..(((.((((.(((((.........))))))))).)))...))))))))))))..)))))).....((.(((((((...(((.....)))...))))))).)).	81	51.4	-74.8	8486	17949	22711	29065	12845	20169	15502.5	17433.5	24773.4	24165.4	10505.7	15326.7	high
254	436	mmu-miR-425-5p	AATGACACGATCACTCCCGTTGA	23	chr9	+	108568776	108568862	gaaagtgctttggAATGACACGATCACTCCCGTTGAgtgggcacccaagaagcCATCGGGAATGTCGTGTCCGCCcagtgctctttc	18	mmu-mir-425,rno-mir-425,cpo-mir-425,cfa-mir-425,cgr-mir-425,hsa-mir-425,ppy-mir-425,bta-mir-425,ptr-mir-425,mdo-mir-425,mml-mir-425,ssc-mir-425,pal-mir-425,dno-mir-425,ocu-mir-425,chi-mir-425,tch-mir-425,mmr-mir-425,	mmu-mir-425	aaagtgctttggAATGACACGATCACTCCCGTTGAgtgggcacccaagaagccATCGGGAATGTCGTGTCCGCCcagtgctcttt	mmu-miR-425-5p	AATGACACGATCACTCCCGTTGA	5'	Yes	gp1a	(((((.((..(((...(((((((.((.(((((.((..(((....)))......)).))))).)))))))))...)))..)).)))))	87	55.2	-35.6	1616	2158	2278	2989	4295	3088	2952.16	2096.02	2484.87	2485.13	3512.82	2346.61	middle
254	437	mmu-miR-425-3p_L+1	CATCGGGAATGTCGTGTCCGCC	22	chr9	+	108568776	108568862	gaaagtgctttggAATGACACGATCACTCCCGTTGAgtgggcacccaagaagcCATCGGGAATGTCGTGTCCGCCcagtgctctttc	18	mmu-mir-425,rno-mir-425,cpo-mir-425,cfa-mir-425,cgr-mir-425,hsa-mir-425,ppy-mir-425,bta-mir-425,ptr-mir-425,mdo-mir-425,mml-mir-425,ssc-mir-425,pal-mir-425,dno-mir-425,ocu-mir-425,chi-mir-425,tch-mir-425,mmr-mir-425,	mmu-mir-425	aaagtgctttggAATGACACGATCACTCCCGTTGAgtgggcacccaagaagccATCGGGAATGTCGTGTCCGCCcagtgctcttt	mmu-miR-425-3p	ATCGGGAATGTCGTGTCCGCC	3'	Diff	gp1a	(((((.((..(((...(((((((.((.(((((.((..(((....)))......)).))))).)))))))))...)))..)).)))))	87	55.2	-35.6	424	575	703	1449	1347	982	774.577	558.487	766.84	1204.73	1101.69	746.236	middle
255	438	mmu-miR-429-3p	TAATACTGTCTGGTAATGCCGT	22	chr4	-	156053905	156053992	actgccctgctgatggatgtcttaccagacatggttagatctggatgcatctgtcTAATACTGTCTGGTAATGCCGTccatccacggc	14	mmu-mir-429,rno-mir-429,cpo-mir-429,cgr-mir-429,bta-mir-429,chi-mir-429,eca-mir-429,cfa-mir-429,efu-mir-429,pal-mir-429,dno-mir-429,gmo-mir-429,xla-mir-429,xla-mir-429-2,	mmu-mir-429	cctgctgatggatGTCTTACCAGACATGGTTAGAtctggatgcatctgtcTAATACTGTCTGGTAATGCCGTccatccacggc	mmu-miR-429-3p	TAATACTGTCTGGTAATGCCGT	3'	Yes	gp1a	...(((.((..((((((((..((((((((((..(((((((..(((....))))))))))..))))))))))...)))))))))).)))	85	50	-37.1	5	17	0	9	6	0	9.13416	16.5118	0	7.48282	4.90731	0	middle
256	439	mmu-miR-431-5p_R-1	TGTCTTGCAGGCCGTCATGC	20	chr12	+	109590440	109590553	tcctgcgcgtcctgcgaggTGTCTTGCAGGCCGTCATGCaggccacactgacggtaacgtTGCAGGTCGTCTTGCAGGGCTTCtcgcaagacgacatcttcatccccaacgacg	10	mmu-mir-431,rno-mir-431,cpo-mir-431,hsa-mir-431,ppy-mir-431,mml-mir-431,bta-mir-431,eca-mir-431,ptr-mir-431,oar-mir-431,	mmu-mir-431	cgtcctgcgaggTGTCTTGCAGGCCGTCATGCAggccacactgacggtaacgttgCAGGTCGTCTTGCAGGGCTTCTcgcaagacgacatc	mmu-miR-431-5p	TGTCTTGCAGGCCGTCATGCA	5'	Diff	gp1a	..((((((((((((((((....))))))))((((((((.......)).))))))..))).)))))((((((((((..(....)..))))))))))...................	20	60.5	-45.2	233	694	419	844	1396	1295	425.652	674.069	457.049	701.722	1141.77	984.089	middle
256	440	mmu-miR-431-3p_L+2R-1	TGCAGGTCGTCTTGCAGGGCTTC	23	chr12	+	109590440	109590553	tcctgcgcgtcctgcgaggTGTCTTGCAGGCCGTCATGCaggccacactgacggtaacgtTGCAGGTCGTCTTGCAGGGCTTCtcgcaagacgacatcttcatccccaacgacg	10	mmu-mir-431,rno-mir-431,cpo-mir-431,hsa-mir-431,ppy-mir-431,mml-mir-431,bta-mir-431,eca-mir-431,ptr-mir-431,oar-mir-431,	mmu-mir-431	cgtcctgcgaggTGTCTTGCAGGCCGTCATGCAggccacactgacggtaacgttgCAGGTCGTCTTGCAGGGCTTCTcgcaagacgacatc	mmu-miR-431-3p	CAGGTCGTCTTGCAGGGCTTCT	3'	Diff	gp1a	..((((((((((((((((....))))))))((((((((.......)).))))))..))).)))))((((((((((..(....)..))))))))))...................	20	60.5	-45.2	175	324	358	608	358	649	319.696	314.695	390.51	505.506	292.803	493.184	middle
257	441	mmu-miR-433-5p	TACGGTGAGCCTGTCATTATTC	22	chr12	+	109591709	109591838	acccaatgcccggggagaagTACGGTGAGCCTGTCATTATTCagagaggctagatcctctgtgttgagaaggATCATGATGGGCTCCTCGGTGTtctccaggtagcggcaccacaccatgaaggcagccc	16	mmu-mir-433,rno-mir-433,hsa-mir-433,ppy-mir-433,cpo-mir-433,cfa-mir-433,bta-mir-433,eca-mir-433,ptr-mir-433,mml-mir-433,ggo-mir-433,pal-mir-433,dno-mir-433,ocu-mir-433,chi-mir-433,oar-mir-433,	mmu-mir-433	tgcccggggagaagTACGGTGAGCCTGTCATTATTCagagaggctagatcctctgtgttgagaaggATCATGATGGGCTCCTCGGTGTtctccaggtagcggcaccacaccatgaaggcagccc	mmu-miR-433-5p	TACGGTGAGCCTGTCATTATTC	5'	Yes	gp1a	......((((...((((((...((..(((((..((((.(((((.(((((......))))).))........))).))))..)))))..))...)))))).(((......)))..........))))....	86	56.2	-44.4	54	159	81	150	172	176	98.649	154.434	88.3556	124.714	140.676	133.745	middle
257	442	mmu-miR-433-3p	ATCATGATGGGCTCCTCGGTGT	22	chr12	+	109591709	109591838	acccaatgcccggggagaagTACGGTGAGCCTGTCATTATTCagagaggctagatcctctgtgttgagaaggATCATGATGGGCTCCTCGGTGTtctccaggtagcggcaccacaccatgaaggcagccc	16	mmu-mir-433,rno-mir-433,hsa-mir-433,ppy-mir-433,cpo-mir-433,cfa-mir-433,bta-mir-433,eca-mir-433,ptr-mir-433,mml-mir-433,ggo-mir-433,pal-mir-433,dno-mir-433,ocu-mir-433,chi-mir-433,oar-mir-433,	mmu-mir-433	tgcccggggagaagTACGGTGAGCCTGTCATTATTCagagaggctagatcctctgtgttgagaaggATCATGATGGGCTCCTCGGTGTtctccaggtagcggcaccacaccatgaaggcagccc	mmu-miR-433-3p	ATCATGATGGGCTCCTCGGTGT	3'	Yes	gp1a	......((((...((((((...((..(((((..((((.(((((.(((((......))))).))........))).))))..)))))..))...)))))).(((......)))..........))))....	86	56.2	-44.4	2634	7825	5649	7846	6575	9419	4811.88	7600.27	6161.99	6523.36	5377.6	7157.63	high
258	443	mmu-miR-434-5p_R-1	GCTCGACTCATGGTTTGAACC	21	chr12	+	109594506	109594599	tcgactctgggtttgaaccaaaGCTCGACTCATGGTTTGAACCattacttaattcgtggTTTGAACCATCACTCGACTCCTggttcgaaccatc	3	mmu-mir-434,rno-mir-434-1,rno-mir-434-2,	mmu-mir-434	tcgactctgggtttgaaccaaaGCTCGACTCATGGTTTGAACCAttacttaattcgtggTTTGAACCATCACTCGACTCCTggttcgaaccatc	mmu-miR-434-5p	GCTCGACTCATGGTTTGAACCA	5'	Diff	gp1a	.........(((((((((((.((.((((...((((((..((((((..........))))))..))))))...))))))..)))))))))))...	82	45.7	-38.8	1649	3892	2381	3971	6334	5361	3012.45	3780.23	2597.22	3301.59	5180.49	4073.9	middle
258	444	mmu-miR-434-3p	TTTGAACCATCACTCGACTCCT	22	chr12	+	109594506	109594599	tcgactctgggtttgaaccaaaGCTCGACTCATGGTTTGAACCattacttaattcgtggTTTGAACCATCACTCGACTCCTggttcgaaccatc	3	mmu-mir-434,rno-mir-434-1,rno-mir-434-2,	mmu-mir-434	tcgactctgggtttgaaccaaaGCTCGACTCATGGTTTGAACCAttacttaattcgtggTTTGAACCATCACTCGACTCCTggttcgaaccatc	mmu-miR-434-3p	TTTGAACCATCACTCGACTCCT	3'	Yes	gp1a	.........(((((((((((.((.((((...((((((..((((((..........))))))..))))))...))))))..)))))))))))...	82	45.7	-38.8	1676	4301	3221	6091	12503	8912	3061.77	4177.48	3513.5	5064.21	10226	6772.35	high
259	445	mmu-miR-448-3p	TTGCATATGTAGGATGTCCCAT	22	chrX	+	147158210	147158321	acgaggaggttgaacatcctgcatagtgctgccaggaaatccctacttcatactaagagggggctggctggTTGCATATGTAGGATGTCCCATctcctggcccacttcgtca	11	mmu-mir-448,rno-mir-448,hsa-mir-448,ppy-mir-448,bta-mir-448,eca-mir-448,ptr-mir-448,mml-mir-448,cja-mir-448,cfa-mir-448,ggo-mir-448,	mmu-mir-448	acgaggaggttGAACATCCTGCATAGTGCTGCCaggaaatccctacttcatactaagagggggctggctggTTGCATATGTAGGATGTCCCATctcctggcccacttcgtca	mmu-miR-448-3p	TTGCATATGTAGGATGTCCCAT	3'	Yes	gp1a	...(((((((...((((((((((((.(((..((((....(((((.(((......)))))))).....))))..)))))))))))))))...)))))))..............	95	52.7	-46.5	14	16	6	11	9	15	25.5757	15.5405	6.54486	9.14567	7.36097	11.3987	middle
260	446	mmu-miR-449c-5p_R+4	AGGCAGTGCATTGCTAGCTGGCTGT	25	chr13	+	113035983	113036091	aggatgaagtgtgggtgtgtcaggcAGGCAGTGCATTGCTAGCTGGCTGTtagaactttatcccaacagttgctagctgcactaccctctgctgcactcagaagcatgc	2	mmu-mir-449c,rno-mir-449c,	mmu-mir-449c	aggatgaagtgtgggtgtgtcaggcAGGCAGTGCATTGCTAGCTGGctgttagaactttatcccaaCAGTTGCTAGCTGCACTACCCTctgctgcactcagaagcatgc	mmu-miR-449c-5p	AGGCAGTGCATTGCTAGCTGG	5'	Diff	gp1a	...(((.....(((((((..((((..((.((((((..((((((...(((((.((......))..)))))..)))))))))))).)).))))..)))))))....)))..	104	52.3	-38.8	0	0	5	0	6	0	0	0	5.45405	0	4.90731	0	low
261	447	mmu-miR-449a-5p	TGGCAGTGTATTGTTAGCTGGT	22	chr13	+	113037534	113037624	ctgtgtgtgatggctTGGCAGTGTATTGTTAGCTGGTtgagtatgtgagcggcaccagctaacatgcgactgctctcctattgcacacaca	13	mmu-mir-449a,rno-mir-449a,hsa-mir-449a,bta-mir-449a,chi-mir-449a,eca-mir-449a,mdo-mir-449a,ppy-mir-449a,mml-mir-449a,cja-mir-449a,cfa-mir-449a,efu-mir-449,pal-mir-449a,	mmu-mir-449a	ctgtgtgtgatggctTGGCAGTGTATTGTTAGCTGGTtgagtatgtgagcggcacCAGCTAACATGCGACTGCTCTCctattgcacacaca	mmu-miR-449a-5p	TGGCAGTGTATTGTTAGCTGGT	5'	Yes	gp1a	.((((((..((((...(((((((((.(((((((((((...((......))...)))))))))))))).))))))...))))..))))))..	88	50.5	-45	10	96	22	28	63	35	18.2683	93.243	23.9978	23.2799	51.5268	26.597	middle
262	448	mmu-miR-450a-5p	TTTTGCGATGTGTTCCTAATAT	22	chrX	-	53048283	53048375	aagatgctgaactatTTTTGCGATGTGTTCCTAATATgtactatgagtatattggggatgctttgcattcatggttctgcatccatcatatgg	6	mmu-mir-450a-2,rno-mir-450b-2,rno-mir-450b-1,hsa-mir-450a-2,mml-mir-450a-2,ppa-mir-450a-2,	mmu-mir-450a-2	gaactatTTTTGCGATGTGTTCCTAATATgtactatgagtatATTGGGGATGCTTTGCATTCATggttc	mmu-miR-450a-5p	TTTTGCGATGTGTTCCTAATAT	5'	Yes	gp1a	..(((((.(((((((...(((((.(..(((((((((((.........)))))))))))..).)))))...))))))).)))))..........	81	37.6	-35.8	332.5	797.5	357	488.5	665	543.5	607.422	774.597	389.419	406.151	543.894	413.013	middle
263	449	mmu-miR-450a-5p	TTTTGCGATGTGTTCCTAATAT	22	chrX	-	53048154	53048249	ccaaagagagatactgagctgtTTTTGCGATGTGTTCCTAATATgtgctataattatATTGGGAACATTTTGCATAAATagctttgtgtcaataca	6	mmu-mir-450a-1,cgr-mir-450a,hsa-mir-450a-1,ptr-mir-450a-1,ptr-mir-450a-2,ocu-mir-450a-1,	mmu-mir-450a-1	gagagatactgagctgtTTTTGCGATGTGTTCCTAATATgtgctataattatATTGGGAACATTTTGCATAAATagctttgtgtcaataca	mmu-miR-450a-5p	TTTTGCGATGTGTTCCTAATAT	5'	Yes	gp1a	.........(((((..((((((((.(((((..(((((((((((((.........)))))))))))))..))))).))))))))..)))))......	81	33.3	-40	332.5	797.5	357	488.5	665	543.5	607.422	774.597	389.419	406.151	543.894	413.013	middle
263	450	mmu-miR-450a-1-3p_2ss19AG20AC	ATTGGGAACATTTTGCATGCAT	22	chrX	-	53048154	53048249	ccaaagagagatactgagctgtTTTTGCGATGTGTTCCTAATATgtgctataattatATTGGGAACATTTTGCATAAATagctttgtgtcaataca	6	mmu-mir-450a-1,cgr-mir-450a,hsa-mir-450a-1,ptr-mir-450a-1,ptr-mir-450a-2,ocu-mir-450a-1,	mmu-mir-450a-1	gagagatactgagctgtTTTTGCGATGTGTTCCTAATATgtgctataattatATTGGGAACATTTTGCATAAATagctttgtgtcaataca	mmu-miR-450a-1-3p	ATTGGGAACATTTTGCATAAAT	3'	Diff	gp1a	.........(((((..((((((((.(((((..(((((((((((((.........)))))))))))))..))))).))))))))..)))))......	81	33.3	-40	41.5	102.5	34	73.5	64.5	55.5	75.8135	99.5563	37.0875	61.1097	52.7536	42.1752	middle
264	451	mmu-miR-450b-5p_R+1	TTTTGCAGTATGTTCCTGAATAC	23	chrX	-	53047997	53048078	gatacagaattatTTTTGCAGTATGTTCCTGAATACataacataagcgtATTGGGAACATTTTGCATGCATaattttgtatc	2	mmu-mir-450b,cgr-mir-450b,	mmu-mir-450b	gatacagaattatTTTTGCAGTATGTTCCTGAATAcataacataagcgtATTGGGAACATTTTGCATGCATaattttgtatc	mmu-miR-450b-5p	TTTTGCAGTATGTTCCTGAATA	5'	Diff	gp1a	(((((((((((((...((((..((((((((.(((((...........)))))))))))))..))))...)))))))))))))	82	30.5	-30.6	27	53	57	50	41	44	49.3245	51.4779	62.1762	41.5712	33.5333	33.4362	middle
264	452	mmu-miR-450b-3p	ATTGGGAACATTTTGCATGCAT	22	chrX	-	53047997	53048078	gatacagaattatTTTTGCAGTATGTTCCTGAATACataacataagcgtATTGGGAACATTTTGCATGCATaattttgtatc	2	mmu-mir-450b,cgr-mir-450b,	mmu-mir-450b	gatacagaattatTTTTGCAGTATGTTCCTGAATAcataacataagcgtATTGGGAACATTTTGCATGCATaattttgtatc	mmu-miR-450b-3p	ATTGGGAACATTTTGCATGCAT	3'	Yes	gp1a	(((((((((((((...((((..((((((((.(((((...........)))))))))))))..))))...)))))))))))))	82	30.5	-30.6	41.5	102.5	34	73.5	64.5	55.5	75.8135	99.5563	37.0875	61.1097	52.7536	42.1752	middle
265	453	mmu-miR-451a_R+1	AAACCGTTACCATTACTGAGTTT	23	chr11	+	78073170	78073241	cttgggaatggcgaggAAACCGTTACCATTACTGAGTTTagtaatggtaacggttctcttgctgctcccaca	15	mmu-mir-451a,rno-mir-451,cpo-mir-451,cgr-mir-451a,hsa-mir-451a,ppy-mir-451,bta-mir-451,chi-mir-451,ptr-mir-451,mml-mir-451,cja-mir-451,cfa-mir-451,ssc-mir-451,ocu-mir-451,xtr-mir-451,	mmu-mir-451a	cttgggaatggcgaggAAACCGTTACCATTACTGAGTTtagtaatggtaacggttctcttgctgctcccaca	mmu-miR-451a	AAACCGTTACCATTACTGAGTT	5'	Diff	gp1a	..(((((..((((((..(((((((((((((((((....)))))))))))))))))..))))))..)))))..	68	47.2	-45.7	0	0	0	0	5	0	0	0	0	0	4.08943	0	low
266	454	mmu-miR-452-5p_L+3R-3	AACTGTTTGCAGAGGAAACTGA	22	chrX	-	72262212	72262309	tgctaagcagttacAACTGTTTGCAGAGGAAACTGAgactttataactatgtcTCAGTCTCATCTGCAAAGAGGtaagtgctttgccaagccccttga	15	mmu-mir-452,rno-mir-452,cpo-mir-452,hsa-mir-452,ppy-mir-452,mml-mir-452,bta-mir-452,ptr-mir-452,cja-mir-452,cfa-mir-452,efu-mir-452,ssc-mir-452,ggo-mir-452,pal-mir-452,ocu-mir-452,	mmu-mir-452	gctaagcagttacaacTGTTTGCAGAGGAAACTGAGACtttataactatgtcTCAGTCTCATCTGCAAAGAGGTaagtgctttgc	mmu-miR-452-5p	TGTTTGCAGAGGAAACTGAGAC	5'	Diff	gp1a	.((.(((((.((((..((.((((((((.((.((((((((...........)))))))).)).)))))))).)))))).))))).))............	85	42.9	-40.5	41	45	31	42	26	24	74.9001	43.7077	33.8151	34.9198	21.265	18.2379	middle
266	455	mmu-miR-452-3p_R-1_1ss20GA	TCAGTCTCATCTGCAAAGAAG	21	chrX	-	72262212	72262309	tgctaagcagttacAACTGTTTGCAGAGGAAACTGAgactttataactatgtcTCAGTCTCATCTGCAAAGAGGtaagtgctttgccaagccccttga	15	mmu-mir-452,rno-mir-452,cpo-mir-452,hsa-mir-452,ppy-mir-452,mml-mir-452,bta-mir-452,ptr-mir-452,cja-mir-452,cfa-mir-452,efu-mir-452,ssc-mir-452,ggo-mir-452,pal-mir-452,ocu-mir-452,	mmu-mir-452	gctaagcagttacaacTGTTTGCAGAGGAAACTGAGACtttataactatgtcTCAGTCTCATCTGCAAAGAGGTaagtgctttgc	mmu-miR-452-3p	TCAGTCTCATCTGCAAAGAGGT	3'	Diff	gp1a	.((.(((((.((((..((.((((((((.((.((((((((...........)))))))).)).)))))))).)))))).))))).))............	85	42.9	-40.5	0	0	0	0	6	0	0	0	0	0	4.90731	0	low
267	456	mmu-miR-455-5p_R+1	TATGTGCCTTTGGACTACATCGT	23	chr4	+	63256851	63256934	ctccctggtgtgagcgTATGTGCCTTTGGACTACATCGTgaacgcagcaccatGCAGTCCACGGGCATATACACTtgcctcaag	3	mmu-mir-455,rno-mir-455,cgr-mir-455,	mmu-mir-455	ctccctggtgtgagcgTATGTGCCTTTGGACTACATCGtgaacgcagcaccatGCAGTCCACGGGCATATACACttgcctca	mmu-miR-455-5p	TATGTGCCTTTGGACTACATCG	5'	Diff	gp1a	.....((..(..((.(((((((((..((((((.(((.(((.......))).))).))))))..))))))))).))..)..))..	77	54.8	-37.9	63	234	93	76	217	197	115.09	227.28	101.445	63.1883	177.481	149.703	middle
267	457	mmu-miR-455-3p_R+1	GCAGTCCACGGGCATATACACT	22	chr4	+	63256851	63256934	ctccctggtgtgagcgTATGTGCCTTTGGACTACATCGTgaacgcagcaccatGCAGTCCACGGGCATATACACTtgcctcaag	3	mmu-mir-455,rno-mir-455,cgr-mir-455,	mmu-mir-455	ctccctggtgtgagcgTATGTGCCTTTGGACTACATCGtgaacgcagcaccatGCAGTCCACGGGCATATACACttgcctca	mmu-miR-455-3p	GCAGTCCACGGGCATATACAC	3'	Diff	gp1a	.....((..(..((.(((((((((..((((((.(((.(((.......))).))).))))))..))))))))).))..)..))..	77	54.8	-37.9	1233	6632	2612	3748	6157	4864	2252.48	6441.54	2849.2	3116.18	5035.72	3696.22	middle
268	458	mmu-miR-463-3p	TGATAGACACCATATAAGGTAG	22	chrX	-	66799223	66799303	accctgctttacctaatttgttgtccatcatgtaaaacataaatgaTGATAGACACCATATAAGGTAGaggaaggttcact	2	mmu-mir-463,rno-mir-463,	mmu-mir-463	cttTACCTAATTTGTTGTCCATCATgtaaaacataaatgaTGATAGACACCATATAAGGTAGaggaaggttcact	mmu-miR-463-3p	TGATAGACACCATATAAGGTAG	3'	Yes	gp1a	..(((.((((((((.((.((.((((((((((...........))))))...)))).)).)).))))))))..)))......	73	35.8	-23.7	0	0	0	5	6	0	0	0	0	4.15712	4.90731	0	low
269	459	mmu-miR-465b-3p	GATCAGGGCCTTTCTAAGTAGA	22	chrX	-	66839052	66839125	gccctatttagaatggcactgatgtgataaaataaaaaattGATCAGGGCCTTTCTAAGTAGAgtaaggcttac	1	mmu-mir-465a,	mmu-mir-465a	gcccTATTTAGAATGGCACTGATGTGAtaaaataaaaaattGATCAGGGCCTTTCTAAGTAGAgtaaggcttac	mmu-miR-465b-3p	GATCAGGGCCTTTCTAAGTAGA	3'	Yes	gp1a	(((((((((((((.(((.(((((...................))))).))).)))))))))).....)))....	70	36.5	-23.3	2.33333	3.66667	1.66667	0	0	1.66667	4.26261	3.56136	1.81802	0	0	1.26652	low
270	460	mmu-miR-465d-5p_R-1	TATTTAGAATGGTACTGATGTG	22	chrX	-	66822656	66822713	TATTTAGAATGGTACTGATGTGatgaaataaaaaattgatcagggcctttctgagtaa	1	mmu-mir-465d,	mmu-mir-465d	TATTTAGAATGGTACTGATGTGAtgaaataaaaaatTGATCAGGGCCTTTCTGAGTAA	mmu-miR-465d-5p	TATTTAGAATGGTACTGATGTGA	5'	Diff	gp1a	(((((((((.((..(((((...................)))))..)).))))))))).	57	31	-16.6	9	9	8	11	8	8	16.4415	8.74153	8.72648	9.14567	6.54308	6.07931	middle
271	461	mmu-miR-465c-5p	TATTTAGAATGGCGCTGATCTG	22	chrX	-	66825955	66826035	tgcaatgcccTATTTAGAATGGCGCTGATCTGatgaataaaaaaaaaatGATCAGGGCCTTTCTAAGTAGAgtaaggctta	2	mmu-mir-465c-1,mmu-mir-465c-2,	mmu-mir-465c-1	tgcaatgcccTATTTAGAATGGCGCTGATCTGatgaataaaaaaaaaatGATCAGGGCCTTTCTAAGTAGAgtaaggctta	mmu-miR-465c-5p	TATTTAGAATGGCGCTGATCTG	5'	Yes	gp1a	.((..(((.((((((((((.(((.((((((...................)))))).))).)))))))))).)))..))...	77	37	-32	7	5	6	10	0	0	12.7878	4.85641	6.54486	8.31424	0	0	middle
271	462	mmu-miR-465b-3p	GATCAGGGCCTTTCTAAGTAGA	22	chrX	-	66825955	66826035	tgcaatgcccTATTTAGAATGGCGCTGATCTGatgaataaaaaaaaaatGATCAGGGCCTTTCTAAGTAGAgtaaggctta	2	mmu-mir-465c-1,mmu-mir-465c-2,	mmu-mir-465c-1	tgcaatgcccTATTTAGAATGGCGCTGATCTGatgaataaaaaaaaaatGATCAGGGCCTTTCTAAGTAGAgtaaggctta	mmu-miR-465b-3p	GATCAGGGCCTTTCTAAGTAGA	3'	Yes	gp1a	.((..(((.((((((((((.(((.((((((...................)))))).))).)))))))))).)))..))...	77	37	-32	2.33333	3.66667	1.66667	0	0	1.66667	4.26261	3.56136	1.81802	0	0	1.26652	low
272	463	mmu-miR-465b-5p	TATTTAGAATGGTGCTGATCTG	22	chrX	-	66829202	66829280	tgcaatgcccTATTTAGAATGGTGCTGATCTGatgaaataaaaaattGATCAGGGCCTTTCTAAGTAGAgtaaggctta	2	mmu-mir-465b-2,mmu-mir-465b-1,	mmu-mir-465b-2	tgcaatgcccTATTTAGAATGGTGCTGATCTGatgaaataaaaaattGATCAGGGCCTTTCTAAGTAGAgtaaggctta	mmu-miR-465b-5p	TATTTAGAATGGTGCTGATCTG	5'	Yes	gp1a	.((..(((.((((((((((.((..((((((.................))))))..)).)))))))))).)))..))...	75	36.7	-28	0	0	0	7	0	5	0	0	0	5.81997	0	3.79957	low
272	464	mmu-miR-465b-3p	GATCAGGGCCTTTCTAAGTAGA	22	chrX	-	66829202	66829280	tgcaatgcccTATTTAGAATGGTGCTGATCTGatgaaataaaaaattGATCAGGGCCTTTCTAAGTAGAgtaaggctta	2	mmu-mir-465b-2,mmu-mir-465b-1,	mmu-mir-465b-2	tgcaatgcccTATTTAGAATGGTGCTGATCTGatgaaataaaaaattGATCAGGGCCTTTCTAAGTAGAgtaaggctta	mmu-miR-465b-3p	GATCAGGGCCTTTCTAAGTAGA	3'	Yes	gp1a	.((..(((.((((((((((.((..((((((.................))))))..)).)))))))))).)))..))...	75	36.7	-28	2.33333	3.66667	1.66667	0	0	1.66667	4.26261	3.56136	1.81802	0	0	1.26652	low
273	465	mmu-mir-466f-2-p5	TGTGTGCATGTGCATGTGTGTAT	23	chr2	+	10468675	10468768	aatgtgtgtttacgtgTGTGTGCATGTGCATGTGTGTATatgaatatatgtatacATACACACACACATACACACTcatgtaacacacacacac	1	mmu-mir-466f-2,	mmu-mir-466f-2	aatgtgtgttTACGTGTGTGTGCATGTGCATGtgtgtatatgaatatatgtataCATACACACACACATACACACtcatgtaacacacacacac	mmu-mir-466f-2-p5	TGTGTGCATGTGCATGtgtgtat	5'	New	gp1a	..((((((((((((((.(((((.(((((..(((((((((((........)))))))))))....))))).))))).))))))).)))))))...	89	37.2	-42.2	2.95	0.5	6.4	2.1	0	4.44545	5.38916	0.485641	6.98119	1.74599	0	3.37816	low
273	466	mmu-miR-466f-3p_L-1R+1	ATACACACACACATACACACT	21	chr2	+	10468675	10468768	aatgtgtgtttacgtgTGTGTGCATGTGCATGTGTGTATatgaatatatgtatacATACACACACACATACACACTcatgtaacacacacacac	1	mmu-mir-466f-2,	mmu-mir-466f-2	aatgtgtgttTACGTGTGTGTGCATGTGCATGtgtgtatatgaatatatgtataCATACACACACACATACACACtcatgtaacacacacacac	mmu-miR-466f-3p	CATACACACACACATACACAC	3'	Diff	gp1a	..((((((((((((((.(((((.(((((..(((((((((((........)))))))))))....))))).))))).))))))).)))))))...	89	37.2	-42.2	63	87.5	278.167	77	81	243	115.09	84.9871	303.427	64.0197	66.2487	184.659	middle
274	467	mmu-miR-466i-5p_L-1R-1	GTGTGTGTGTGTGTGTGT	18	chr13	+	17747473	17747593	agagatcatgtcagtgaactgccacatttttgatatatattatgtatgtatGTGTGTGTGTGTGTGTGTgtgtatatatATACACACACACATACACACTacatgtatgcaacatatatac	1	mmu-mir-466i,	mmu-mir-466i	agagatcatgtcagtgaactgccacatttttgatatatattatgtatgtaTGTGTGTGTGTGTGTGTGTGtgtatatatATACACACACACATACACACTAcatgtatgcaacatatatac	mmu-miR-466i-5p	TGTGTGTGTGTGTGTGTGTG	5'	Diff	gp1a	((((((..((.(((....))).)).))))))..(((((((..(((((..(((((((((((((((((((((((((....))))))))))))))))))))).))))..)))))..))))))).	87	33.1	-52.8	5.33333	26.8333	19.0833	2.5	4	7.91667	9.74311	26.0627	20.8163	2.07856	3.27154	6.01599	middle
274	468	mmu-miR-466i-3p_R-1	ATACACACACACATACACACT	21	chr13	+	17747473	17747593	agagatcatgtcagtgaactgccacatttttgatatatattatgtatgtatGTGTGTGTGTGTGTGTGTgtgtatatatATACACACACACATACACACTacatgtatgcaacatatatac	1	mmu-mir-466i,	mmu-mir-466i	agagatcatgtcagtgaactgccacatttttgatatatattatgtatgtaTGTGTGTGTGTGTGTGTGTGtgtatatatATACACACACACATACACACTAcatgtatgcaacatatatac	mmu-miR-466i-3p	ATACACACACACATACACACTA	3'	Diff	gp1a	((((((..((.(((....))).)).))))))..(((((((..(((((..(((((((((((((((((((((((((....))))))))))))))))))))).))))..)))))..))))))).	87	33.1	-52.8	63	87.5	278.167	77	81	243	115.09	84.9871	303.427	64.0197	66.2487	184.659	middle
275	469	mmu-mir-466k-p5	TGTGTGTGTGTGTGTGTG	18	chr3	+	85467377	85467498	atataTGTGTGTGTGTGTGTGTGtgtgtacatgtacatgtgagtatgtgtgtgtatatgtttgtacatgtgcatgtgtgtgagtatgtgaatatatgtgtatatgtgtgcatgtgcatgtgt	1	mmu-mir-466k,	mmu-mir-466k	atatatgtgtgtgtgtgtgTGTGTGTGTACATGTACATGTGAgtatgtgtgtgtatatgtttgtacatgtgcatgtgtgtgagtatgtgaatatatgtgtatatgtgtgcatgtgcatgtgt	mmu-mir-466k-p5	tgtgtgtgtgTGTGTGTG	5'	New	gp1a	..(((..(((..(((..(..(((((..((.((((.((..((..((..(..((((((((((....))))))))))..)..))..))..)).)))).))..)))))..)..)))..)))..)))	120	36.9	-43.3	25.2	50.1667	80.8333	15.3333	17.6667	64.4167	46.0362	48.7259	88.1738	12.7485	14.4493	48.9511	middle
276	470	mmu-miR-466f-5p_L-1R+1	ACGTGTGTGTGCATGTGCATGT	22	chr13	+	71107089	71107209	catctgcatctgtgtgtctACGTGTGTGTGCATGTGCATGTgtgtgtatctgtatgtgagtgtgtgcatgcatgtgtgtgcatctatatctgtgtgtctacttgtgtgtgaatgtgcatat	1	mmu-mir-466f-4,	mmu-mir-466f-4	catctgcatctgtgtgtcTACGTGTGTGTGCATGTGCATGtgtgtgtatctgtatgtgagtgtgtgcatgcatgtgtgtgcatctatatctgtgtgtctacttgtgtgtgaatgtgcatat	mmu-miR-466f-5p	TACGTGTGTGTGCATGTGCATG	5'	Diff	gp1a	(((..((((....(((..((((((((..(((((..(((((..((..(((((.......)).)))..))..)))))..)))))..)))))....)))..)))....))))..))).......	114	43.8	-33.8	0	0	1.25	0	0	2	0	0	1.36351	0	0	1.51983	low
277	471	mmu-mir-466f-1-p5	TGTGTGCATGTGCATGTGTGTAT	23	chr2	+	10466944	10467037	catgtgtgtttacgtgTGTGTGCATGTGCATGTGTGTATatgaatatacATACACATACACACACACATACacacacatgcaacacacacatat	3	mmu-mir-466f-1,rno-mir-466b-3,rno-mir-466b-1,	mmu-mir-466f-1	catgtgtgttTACGTGTGTGTGCATGTGCATGtgtgtatatgaatatacatacaCATACACACACACATACACACacatgcaacacacacatat	mmu-mir-466f-1-p5	TGTGTGCATGTGCATGtgtgtat	5'	New	gp1a	(((((((((.((.(((((((((.(((((.((((((((......)))))))).))))).))))))))).)).)))))))))..............	80	38.3	-42.8	2.95	0.5	6.4	2.1	0	4.44545	5.38916	0.485641	6.98119	1.74599	0	3.37816	low
277	472	mmu-mir-466f-1-p3	ATACACATACACACACACATAC	22	chr2	+	10466944	10467037	catgtgtgtttacgtgTGTGTGCATGTGCATGTGTGTATatgaatatacATACACATACACACACACATACacacacatgcaacacacacatat	3	mmu-mir-466f-1,rno-mir-466b-3,rno-mir-466b-1,	mmu-mir-466f-1	catgtgtgttTACGTGTGTGTGCATGTGCATGtgtgtatatgaatatacatacaCATACACACACACATACACACacatgcaacacacacatat	mmu-mir-466f-1-p3	atacaCATACACACACACATAC	3'	New	gp1a	(((((((((.((.(((((((((.(((((.((((((((......)))))))).))))).))))))))).)).)))))))))..............	80	38.3	-42.8	0	0	16.1667	2.5	0	18.5	0	0	17.6348	2.07856	0	14.0584	middle
278	473	mmu-mir-466f-3-p5	TGTGTGCATGTGCATGTGTGTAT	23	chr2	+	10471953	10472046	catgtgtgtttacgtgTGTGTGCATGTGCATGTGTGTATatgaatatatgtatacATACACACACACATACACACGCacgcaacacacacacac	1	mmu-mir-466f-3,	mmu-mir-466f-3	catgtgtgttTACGTGTGTGTGCATGTGCATGtgtgtatatgaatatatgtataCATACACACACACATACACACgcacgcaacacacacacac	mmu-mir-466f-3-p5	TGTGTGCATGTGCATGtgtgtat	5'	New	gp1a	..((((((((..((((((((((.(((((..(((((((((((........)))))))))))....))))).)))))))))).)))))))).....	87	41.5	-43.7	2.95	0.5	6.4	2.1	0	4.44545	5.38916	0.485641	6.98119	1.74599	0	3.37816	low
278	474	mmu-miR-466f-3p_L-1R+2	ATACACACACACATACACACGC	22	chr2	+	10471953	10472046	catgtgtgtttacgtgTGTGTGCATGTGCATGTGTGTATatgaatatatgtatacATACACACACACATACACACGCacgcaacacacacacac	1	mmu-mir-466f-3,	mmu-mir-466f-3	catgtgtgttTACGTGTGTGTGCATGTGCATGtgtgtatatgaatatatgtataCATACACACACACATACACACgcacgcaacacacacacac	mmu-miR-466f-3p	CATACACACACACATACACAC	3'	Diff	gp1a	..((((((((..((((((((((.(((((..(((((((((((........)))))))))))....))))).)))))))))).)))))))).....	87	41.5	-43.7	44	26	141.167	51	9	120.5	80.3806	25.2533	153.986	42.4026	7.36097	91.5697	middle
279	475	mmu-miR-466d-5p_L-1R+1	GTGTGTGCGTACATGTACATGT	22	chr2	+	10511967	10512062	catgtgtgtttGTGTGTGCGTACATGTACATGTgtgtatatgaatatacaTATACATACACGCACACATAGAtacgcacgcacacacacacacagg	1	mmu-mir-466d,	mmu-mir-466d	catgtgtgttTGTGTGTGCGTACATGTACATGtgtgtatatgaatatacatatacatacacgcacacatagaTACGCACGCACACACACACacagg	mmu-miR-466d-5p	TGTGTGTGCGTACATGTACATG	5'	Diff	gp1a	..(((((((.((((((((((((.((((...((((((((((((......)))))))))))).....))))...)))))))))))).)))))))....	90	41.7	-45.4	0	0	3.5	0	0	2.5	0	0	3.81784	0	0	1.89979	low
279	476	mmu-mir-466d-p3_1ss22AT	TATACATACACGCACACATAGT	22	chr2	+	10511967	10512062	catgtgtgtttGTGTGTGCGTACATGTACATGTgtgtatatgaatatacaTATACATACACGCACACATAGAtacgcacgcacacacacacacagg	1	mmu-mir-466d,	mmu-mir-466d	catgtgtgttTGTGTGTGCGTACATGTACATGtgtgtatatgaatatacatatacatacacgcacacatagaTACGCACGCACACACACACacagg	mmu-mir-466d-p3	tatacatacacgcacacataga	3'	New	gp1a	..(((((((.((((((((((((.((((...((((((((((((......)))))))))))).....))))...)))))))))))).)))))))....	90	41.7	-45.4	69.5	94	251.107	178.893	135.071	394.393	126.965	91.3004	273.91	148.736	110.473	299.705	middle
280	477	mmu-miR-466d-5p_L-1R+1	GTGTGTGCGTACATGTACATGT	22	chr2	+	10513741	10513834	gtatgtgcatgtgtgtttGTGTGTGCGTACATGTACATGTgtgtatatgaatatgcaTATACATGAGAGCATACATAGAcacacgtgcatgtgc	1	mmu-mir-466n,	mmu-mir-466n	gtatgtgcatgtgtgttTGTGTGTGCGTACATGTACATGtgtgtatatgaatatgcaTATACATGAGAGCATACATAGAcacacgtgcatgtgc	mmu-miR-466d-5p	TGTGTGTGCGTACATGTACATG	5'	Diff	gp1a	(((..(((((((((((((((((((((...((((((.(((..(((......)))..))).))))))...)))))))))))))))))))))..)))	94	40.4	-53.7	0	0	3.5	0	0	2.5	0	0	3.81784	0	0	1.89979	low
280	478	mmu-miR-466n-3p	TATACATGAGAGCATACATAGA	22	chr2	+	10513741	10513834	gtatgtgcatgtgtgtttGTGTGTGCGTACATGTACATGTgtgtatatgaatatgcaTATACATGAGAGCATACATAGAcacacgtgcatgtgc	1	mmu-mir-466n,	mmu-mir-466n	gtatgtgcatgtgtgttTGTGTGTGCGTACATGTACATGtgtgtatatgaatatgcaTATACATGAGAGCATACATAGAcacacgtgcatgtgc	mmu-miR-466n-3p	TATACATGAGAGCATACATAGA	3'	Yes	gp1a	(((..(((((((((((((((((((((...((((((.(((..(((......)))..))).))))))...)))))))))))))))))))))..)))	94	40.4	-53.7	13	9	9	0	6	0	23.7488	8.74153	9.81729	0	4.90731	0	middle
281	479	mmu-miR-466b-5p	TGATGTGTGTGTACATGTACAT	22	chr2	+	10476628	10476713	gtgtgtatgtgtTGATGTGTGTGTACATGTACATatgtgaatatgatatacatATACATACACGCACACATAAGAcacatatgagc	2	mmu-mir-466b-8,mmu-mir-466e,	mmu-mir-466e	gtgtatgtgtTGATGTGTGTGTACATGTACATatgtgaatatgatatacaTATACATACACGCACACATAAGAcacatatgagc	mmu-miR-466b-5p	TGATGTGTGTGTACATGTACAT	5'	Yes	gp1a	((((.((((((.((.((((((((((.((((((((((....)))))...))))).))))))))))))))))))..))))........	78	34.9	-32.5	0	0.833333	2.8	2.25	1	1	0	0.809401	3.05427	1.8707	0.817885	0.759914	low
281	480	mmu-miR-466e-3p_L-1	ATACATACACGCACACATAAGA	22	chr2	+	10476628	10476713	gtgtgtatgtgtTGATGTGTGTGTACATGTACATatgtgaatatgatatacatATACATACACGCACACATAAGAcacatatgagc	2	mmu-mir-466b-8,mmu-mir-466e,	mmu-mir-466e	gtgtatgtgtTGATGTGTGTGTACATGTACATatgtgaatatgatatacaTATACATACACGCACACATAAGAcacatatgagc	mmu-miR-466e-3p	TATACATACACGCACACATAAGA	3'	Diff	gp1a	((((.((((((.((.((((((((((.((((((((((....)))))...))))).))))))))))))))))))..))))........	78	34.9	-32.5	17.0714	17.2857	51.7262	46.2262	30.7619	107.607	31.1866	16.7893	56.4235	38.4336	25.1597	81.7722	middle
282	481	mmu-mir-466j-p3_1ss18CG	GTATGTATGTGTGTGTGG	18	chr10	+	60960723	60960844	gtgtgtgtgtgtgtgcattcgtgtgtttgtgcatgtgtgtatgtgtgcacatttatgtgtgtgcatgtGTATGTATGTGTGTGTGCatgtgcatgtgtgtaattgtgtatatatgtgcatac	1	mmu-mir-466j,	mmu-mir-466j	gtgtgtgtgtgtgtgcattcgtgtgtttgtgcatgtgtgtatgtgtgcacatttatgtgtgtgcatgtgtatgtatgtgTGTGTGCATGTGCATGTGTGTAAttgtgtatatatgtgcatac	mmu-mir-466j-p3	gtatgtatgtgTGTGTGC	3'	New	gp1a	((((((..((((((((((...........(((((..(((((..((..(((((..(..((..(((....)))..))..))))))..))..)))))..)))))...))))))))))..))))))	72	41	-49.5	0	0	2.5	0	0	0	0	0	2.72703	0	0	0	low
283	482	mmu-miR-466i-5p_L-2	TGTGTGTGTGTGTGTGTG	18	chr3	+	28419945	28420018	gTGTGTGTGTGTGTGTGTGtgtgtgtatgtgtgtgtagtataTGTGCACACACACACATACGTacccatgcatg	1	mmu-mir-466q,	mmu-mir-466q	gTGTGTGTGTGTGTGTGTGTGtgtgtgtatgtgtgtgtagtatatGTGCACACACACACATACGTacccatgcatg	mmu-miR-466i-5p	TGTGTGTGTGTGTGTGTGTG	5'	Diff	gp1a	(..((.((..(((((((((((((((((..((((.....))))..)))))))))))))))))..)).))..)...	71	45.9	-41.7	25.2	50.1667	80.8333	15.3333	17.6667	64.4167	46.0362	48.7259	88.1738	12.7485	14.4493	48.9511	middle
283	483	mmu-miR-466q_L+1	TGTGCACACACACACATACGT	21	chr3	+	28419945	28420018	gTGTGTGTGTGTGTGTGTGtgtgtgtatgtgtgtgtagtataTGTGCACACACACACATACGTacccatgcatg	1	mmu-mir-466q,	mmu-mir-466q	gTGTGTGTGTGTGTGTGTGTGtgtgtgtatgtgtgtgtagtatatGTGCACACACACACATACGTacccatgcatg	mmu-miR-466q	GTGCACACACACACATACGT	3'	Diff	gp1a	(..((.((..(((((((((((((((((..((((.....))))..)))))))))))))))))..)).))..)...	71	45.9	-41.7	0	0	5	0	0	5	0	0	5.45405	0	0	3.79957	low
284	484	mmu-miR-466b-5p	TGATGTGTGTGTACATGTACAT	22	chr2	+	10503565	10503645	tatatgtgtTGATGTGTGTGTACATGTACATgtgtgaatatgatatacaaATACATACACGCACACATAAGAcacatatga	1	mmu-mir-466b-3,	mmu-mir-466b-3	tatatgtgtTGATGTGTGTGTACATGTACATgtgtgaatatgatatacaaATACATACACGCACACATAAGAcacatatga	mmu-miR-466b-5p	TGATGTGTGTGTACATGTACAT	5'	Yes	gp1a	((((((((((.((((((((((..(((((..((((((.......))))))..)))))..))))))))))..)))))))))).	80	32.1	-32.4	0	0.833333	2.8	2.25	1	1	0	0.809401	3.05427	1.8707	0.817885	0.759914	low
284	485	mmu-miR-466p-3p	ATACATACACGCACACATAAGA	22	chr2	+	10503565	10503645	tatatgtgtTGATGTGTGTGTACATGTACATgtgtgaatatgatatacaaATACATACACGCACACATAAGAcacatatga	1	mmu-mir-466b-3,	mmu-mir-466b-3	tatatgtgtTGATGTGTGTGTACATGTACATgtgtgaatatgatatacaaATACATACACGCACACATAAGAcacatatga	mmu-miR-466p-3p	ATACATACACGCACACATAAGA	3'	Yes	gp1a	((((((((((.((((((((((..(((((..((((((.......))))))..)))))..))))))))))..)))))))))).	80	32.1	-32.4	17.0714	17.2857	51.7262	46.2262	30.7619	107.607	31.1866	16.7893	56.4235	38.4336	25.1597	81.7722	middle
285	486	mmu-miR-466e-3p_L-1	ATACATACACGCACACATAAGA	22	chr2	+	10507918	10507990	tatatgtgtttatgtgtgtgtacatgtacatatgtgaatatgatatccatATACATACACGCACACATAAGAc	1	mmu-mir-466a,	mmu-mir-466a	tatatgtgttTATGTGTGTGTACATGTACATatgtgaatatgatatccaTATACATACACGCACACATAAGAc	mmu-miR-466e-3p	TATACATACACGCACACATAAGA	3'	Diff	gp1a	..(((((((...((((((((((.((((((((((....))))).))..))).)))))))))).)))))))....	67	31.5	-22.4	17.0714	17.2857	51.7262	46.2262	30.7619	107.607	31.1866	16.7893	56.4235	38.4336	25.1597	81.7722	middle
286	487	mmu-miR-466h-5p_R+1	TGTGTGCATGTGCTTGTGTGTAT	23	chr2	+	10514891	10514971	tgtatatttgTGTGTGCATGTGCTTGTGTGTATgtgaatatatatatcaTACGCACGCACACACACACACAaatgcaagca	1	mmu-mir-466h,	mmu-mir-466h	tgtatatttgTGTGTGCATGTGCTTGTGTGTAtgtgaatatatatatcaTACGCACGCACACACACACacaaatgcaagca	mmu-miR-466h-5p	TGTGTGCATGTGCTTGTGTGTA	5'	Diff	gp1a	(((((..(((((((((..(((((..(((((((((.............))))))))))))))..))))))))))))))....	77	38.3	-34.1	8	15	32	25	23	57.5455	14.6147	14.5692	34.9059	20.7856	18.8114	43.7296	middle
286	488	mmu-miR-466h-3p_R+3	TACGCACGCACACACACACACA	22	chr2	+	10514891	10514971	tgtatatttgTGTGTGCATGTGCTTGTGTGTATgtgaatatatatatcaTACGCACGCACACACACACACAaatgcaagca	1	mmu-mir-466h,	mmu-mir-466h	tgtatatttgTGTGTGCATGTGCTTGTGTGTAtgtgaatatatatatcaTACGCACGCACACACACACacaaatgcaagca	mmu-miR-466h-3p	TACGCACGCACACACACAC	3'	Diff	gp1a	(((((..(((((((((..(((((..(((((((((.............))))))))))))))..))))))))))))))....	77	38.3	-34.1	23.5	27	98.5	24	18.5	116	42.9306	26.2246	107.445	19.9542	15.1309	88.15	middle
287	489	mmu-miR-466b-5p	TGATGTGTGTGTACATGTACAT	22	chr2	+	10498685	10498766	tgtatgtgtTGATGTGTGTGTACATGTACATgtctgaatatgatatacatATACATACACGCACACATAAGAcacatatgag	1	mmu-mir-466b-2,	mmu-mir-466b-2	tgtatgtgtTGATGTGTGTGTACATGTACATgtctgaatatgatatacaTATACATACACGCACACATAAGAcacatatgag	mmu-miR-466b-5p	TGATGTGTGTGTACATGTACAT	5'	Yes	gp1a	.(((((((((.((((((((((..(((((.((((.............)))).)))))..))))))))))..)))))))))...	78	34.1	-29.5	0	0.833333	2.8	2.25	1	1	0	0.809401	3.05427	1.8707	0.817885	0.759914	low
287	490	mmu-miR-466e-3p_L-1	ATACATACACGCACACATAAGA	22	chr2	+	10498685	10498766	tgtatgtgtTGATGTGTGTGTACATGTACATgtctgaatatgatatacatATACATACACGCACACATAAGAcacatatgag	1	mmu-mir-466b-2,	mmu-mir-466b-2	tgtatgtgtTGATGTGTGTGTACATGTACATgtctgaatatgatatacaTATACATACACGCACACATAAGAcacatatgag	mmu-miR-466e-3p	TATACATACACGCACACATAAGA	3'	Diff	gp1a	.(((((((((.((((((((((..(((((.((((.............)))).)))))..))))))))))..)))))))))...	78	34.1	-29.5	17.0714	17.2857	51.7262	46.2262	30.7619	107.607	31.1866	16.7893	56.4235	38.4336	25.1597	81.7722	middle
288	491	mmu-miR-466c-5p_R-2	TGATGTGTGTGTGCATGTACAT	22	chr2	+	10481531	10481620	tgtgtatatgtgtTGATGTGTGTGTGCATGTACATatgtgaatatgatatacatATACATACACGCACACATAAGAcacatatgagcaca	3	mmu-mir-466c-3,mmu-mir-466c-2,mmu-mir-466c-1,	mmu-mir-466c-1	gtatatgtgtTGATGTGTGTGTGCATGTACATATgtgaatatgatatacaTATACATACACGCACACATAAGAcacatatgagc	mmu-miR-466c-5p	TGATGTGTGTGTGCATGTACATAT	5'	Diff	gp1a	.(((((((((((((.(((((((((((.(((((..((((((.........))))))))))).)))))))))))..)))))))))..)))).	88	34.4	-37.8	17	20	109	40	38	94	31.0562	19.4256	118.898	33.257	31.0796	71.4319	middle
288	492	mmu-miR-466e-3p_L-1	ATACATACACGCACACATAAGA	22	chr2	+	10481531	10481620	tgtgtatatgtgtTGATGTGTGTGTGCATGTACATatgtgaatatgatatacatATACATACACGCACACATAAGAcacatatgagcaca	3	mmu-mir-466c-3,mmu-mir-466c-2,mmu-mir-466c-1,	mmu-mir-466c-1	gtatatgtgtTGATGTGTGTGTGCATGTACATATgtgaatatgatatacaTATACATACACGCACACATAAGAcacatatgagc	mmu-miR-466e-3p	TATACATACACGCACACATAAGA	3'	Diff	gp1a	.(((((((((((((.(((((((((((.(((((..((((((.........))))))))))).)))))))))))..)))))))))..)))).	88	34.4	-37.8	17.0714	17.2857	51.7262	46.2262	30.7619	107.607	31.1866	16.7893	56.4235	38.4336	25.1597	81.7722	middle
289	493	mmu-miR-466p-5p_L-2R+4	TGTGTGTGTACATGTACATGTGT	23	chr2	+	10506006	10506094	tgtgtatatgtgtttaTGTGTGTGTACATGTACATGTGTgaatatgatgatatATACATACACGCACACATAAGAcacatatgagcaca	1	mmu-mir-466p,	mmu-mir-466p	tgtgtatatgtgttTATGTGTGTGTACATGTACATgtgtgaatatgatgataTATACATACACGCACACATAAGAcacatatgagcaca	mmu-miR-466p-5p	TATGTGTGTGTACATGTACAT	5'	Diff	gp1a	.((((((((((((((((((((((((..((((((((((....)))))........)))))..))))))))))).)))))))))..)))).	87	33.7	-34.2	0	0.833333	0	2.25	0	0	0	0.809401	0	1.8707	0	0	low
289	494	mmu-miR-466e-3p_L-1	ATACATACACGCACACATAAGA	22	chr2	+	10506006	10506094	tgtgtatatgtgtttaTGTGTGTGTACATGTACATGTGTgaatatgatgatatATACATACACGCACACATAAGAcacatatgagcaca	1	mmu-mir-466p,	mmu-mir-466p	tgtgtatatgtgttTATGTGTGTGTACATGTACATgtgtgaatatgatgataTATACATACACGCACACATAAGAcacatatgagcaca	mmu-miR-466e-3p	TATACATACACGCACACATAAGA	3'	Diff	gp1a	.((((((((((((((((((((((((..((((((((((....)))))........)))))..))))))))))).)))))))))..)))).	87	33.7	-34.2	17.0714	17.2857	51.7262	46.2262	30.7619	107.607	31.1866	16.7893	56.4235	38.4336	25.1597	81.7722	middle
290	495	mmu-miR-466b-5p	TGATGTGTGTGTACATGTACAT	22	chr2	+	10472540	10472623	tgtgtgtatgtgtTGATGTGTGTGTACATGTACATgtgtgaatatgatatacatacatgcacacataagacacatatgagcaca	1	mmu-mir-466o,	mmu-mir-466o	tgtgtgtatgtgtTGATGTGTGTGTACATGTACATgtgtgaatatgataTACATACATGCACACATAAGACacatatgagcaca	mmu-miR-466b-5p	TGATGTGTGTGTACATGTACAT	5'	Yes	gp1a	.(((((((((((((..((((((((((.((((((((((....)))))...)))))...)))))))))).)))))))))..)))).	82	35.7	-32.8	0	0.833333	2.8	2.25	1	1	0	0.809401	3.05427	1.8707	0.817885	0.759914	low
291	496	mmu-miR-466b-5p	TGATGTGTGTGTACATGTACAT	22	chr2	+	10474215	10474304	tgtgtgtatgtgtTGATGTGTGTGTACATGTACATgtgtgaatatgatatacatATACATACACGCACACATAAGAcacatatgagcaca	5	mmu-mir-466b-4,mmu-mir-466b-6,mmu-mir-466b-5,mmu-mir-466b-7,mmu-mir-466b-1,	mmu-mir-466b-1	tgtatgtgtTGATGTGTGTGTACATGTACATgtgtgaatatgatatacaTATACATACACGCACACATAAGAcacatatgag	mmu-miR-466b-5p	TGATGTGTGTGTACATGTACAT	5'	Yes	gp1a	.(((((((((((((.((((((((((..(((((.(((((((.......))))))).)))))..))))))))))..)))))))))..)))).	88	35.6	-38	0	0.833333	2.8	2.25	1	1	0	0.809401	3.05427	1.8707	0.817885	0.759914	low
291	497	mmu-miR-466e-3p_L-1	ATACATACACGCACACATAAGA	22	chr2	+	10474215	10474304	tgtgtgtatgtgtTGATGTGTGTGTACATGTACATgtgtgaatatgatatacatATACATACACGCACACATAAGAcacatatgagcaca	5	mmu-mir-466b-4,mmu-mir-466b-6,mmu-mir-466b-5,mmu-mir-466b-7,mmu-mir-466b-1,	mmu-mir-466b-1	tgtatgtgtTGATGTGTGTGTACATGTACATgtgtgaatatgatatacaTATACATACACGCACACATAAGAcacatatgag	mmu-miR-466e-3p	TATACATACACGCACACATAAGA	3'	Diff	gp1a	.(((((((((((((.((((((((((..(((((.(((((((.......))))))).)))))..))))))))))..)))))))))..)))).	88	35.6	-38	17.0714	17.2857	51.7262	46.2262	30.7619	107.607	31.1866	16.7893	56.4235	38.4336	25.1597	81.7722	middle
292	498	mmu-miR-466m-5p	TGTGTGCATGTGCATGTGTGTAT	23	chr2	+	10466663	10466746	tgtgtgtgttcttgTGTGTGCATGTGCATGTGTGTATatgaatatacataTACATACACACATACACACGCACgtacacacaca	1	mmu-mir-466m,	mmu-mir-466m	tgtgtgtgttcttgTGTGTGCATGTGCATGTGTGTATatgaatatacataTACATACACACATACACACGCAcgtacacacaca	mmu-miR-466m-5p	TGTGTGCATGTGCATGTGTGTAT	5'	Yes	gp1a	.((((((((...((((((((.(((((..((((((((((((......))))))))))))))))).))))))))...)))))))).	82	39.3	-45.4	2.95	0.5	6.4	2.1	0	4.44545	5.38916	0.485641	6.98119	1.74599	0	3.37816	low
292	499	mmu-miR-466m-3p_R+1	TACATACACACATACACACGCAT	23	chr2	+	10466663	10466746	tgtgtgtgttcttgTGTGTGCATGTGCATGTGTGTATatgaatatacataTACATACACACATACACACGCACgtacacacaca	1	mmu-mir-466m,	mmu-mir-466m	tgtgtgtgttcttgTGTGTGCATGTGCATGTGTGTATatgaatatacataTACATACACACATACACACGCAcgtacacacaca	mmu-miR-466m-3p	TACATACACACATACACACGCA	3'	Diff	gp1a	.((((((((...((((((((.(((((..((((((((((((......))))))))))))))))).))))))))...)))))))).	82	39.3	-45.4	0	0	11	6	0	14	0	0	11.9989	4.98855	0	10.6388	middle
293	500	mmu-miR-466g_1ss21AT	ATACAGACACATGCACACACT	21	chr2	+	10514595	10514674	tgtgttttcgtgtgtgtgcatgtggatgtatgtatatgattttgcatATACAGACACATGCACACACAtgcggcacacac	1	mmu-mir-466g,	mmu-mir-466g	tgtgttttcgtgtgtgtgcatgtggatgtatgtatatgattttgcatATACAGACACATGCACACACAtgcggcacacac	mmu-miR-466g	ATACAGACACATGCACACACA	3'	Diff	gp1a	((((((..((((((((((((((((..(((((((..(......)..)))))))..))))))))))))))))..).))))).	79	42.5	-41.5	16	0	13	36	5	56	29.2293	0	14.1805	29.9313	4.08943	42.5552	middle
294	501	mmu-mir-467f-p5_1ss12GT	GTGTGTGTGTATGTGTGTGTGTGTGT	26	chr11	-	69635400	69635519	acggctacatagagaaatcctgtacccagaaatcgaacgggggtggGTGTGTGTGTAGGTGTGTGTGTGTGTATGTATGTAtatacacacacacacctacacacagcttttttggaattt	1	mmu-mir-467f,	mmu-mir-467f	acggctacatagagaaatcctgtacccagaaatcgaacgggggtgggtgtgtgtgtaggtgtgtgtgtgtgtatgtatgtATATACACACACACACCTACAcacagcttttttggaattt	mmu-mir-467f-p5	gtgtgtgtgtaggtgtgtgtgtgtgt	5'	New	gp1a	....(((...((((..((((....(((...........)))...)))).((((((((((((((((((((((((((....)))))))))))))))))))))))))).))))..))).....	56	44.2	-53.5	0	3	0	0	0	2.5	0	2.91384	0	0	0	1.89979	low
294	502	mmu-mir-467f-p3_1ss1GT	TGTGTGTGTGTGTGTATGTATGTA	24	chr11	-	69635400	69635519	acggctacatagagaaatcctgtacccagaaatcgaacgggggtggGTGTGTGTGTAGGTGTGTGTGTGTGTATGTATGTAtatacacacacacacctacacacagcttttttggaattt	1	mmu-mir-467f,	mmu-mir-467f	acggctacatagagaaatcctgtacccagaaatcgaacgggggtgggtgtgtgtgtaggtgtgtgtgtgtgtatgtatgtATATACACACACACACCTACAcacagcttttttggaattt	mmu-mir-467f-p3	ggtgtgtgtgtgtgtatgtatgtA	3'	New	gp1a	....(((...((((..((((....(((...........)))...)))).((((((((((((((((((((((((((....)))))))))))))))))))))))))).))))..))).....	56	44.2	-53.5	0	0	1.25	0	0	6	0	0	1.36351	0	0	4.55948	low
295	503	mmu-miR-467b-5p_L-1R+1	TAAGTGCCTGCATGTATATGC	21	chr2	+	10481248	10481320	ccgtgtgcgTAAGTGCCTGCATGTATATGCgtgtatattttatgcatatacatacacacaccaacacacacat	1	mmu-mir-467b,	mmu-mir-467b	ccgtgtgcGTAAGTGCCTGCATGTATATGcgtgtatattttatgcATATACATACACACACCAACACacacat	mmu-miR-467b-5p	GTAAGTGCCTGCATGTATATG	5'	Diff	gp1a	..(((((.((..(((..((.(((((((((((((.......))))))))))))).))..)))..)).)))))..	69	41.1	-29.4	24	33	28.25	35.75	43.15	29.75	43.844	32.0523	30.8154	29.7234	35.2918	22.6074	middle
296	504	mmu-miR-467d-5p_L+1R-1	ATAAGTGCGCGCATGTATATGC	22	chr2	+	10507630	10507714	cctgtgtgcATAAGTGCGCGCATGTATATGCgtgtatattttatgcATATACATACACACACCTACACacacatgcacacagaca	1	mmu-mir-467d,	mmu-mir-467d	cctgtgtgcaTAAGTGCGCGCATGTATATGCGtgtatattttatgcATATACATACACACACCTACACacacatgcacacagaca	mmu-miR-467d-5p	TAAGTGCGCGCATGTATATGCG	5'	Diff	gp1a	.((((((((((..(((.....(((((((((((((.......))))))))))))).............)))..))))))))))...	33	42.4	-31.1	23	23	54	92	125	126	42.0171	22.3395	58.9038	76.491	102.236	95.7492	middle
296	505	mmu-miR-467d-3p	ATATACATACACACACCTACAC	22	chr2	+	10507630	10507714	cctgtgtgcATAAGTGCGCGCATGTATATGCgtgtatattttatgcATATACATACACACACCTACACacacatgcacacagaca	1	mmu-mir-467d,	mmu-mir-467d	cctgtgtgcaTAAGTGCGCGCATGTATATGCGtgtatattttatgcATATACATACACACACCTACACacacatgcacacagaca	mmu-miR-467d-3p	ATATACATACACACACCTACAC	3'	Yes	gp1a	.((((((((((..(((.....(((((((((((((.......))))))))))))).............)))..))))))))))...	33	42.4	-31.1	11.25	9.75	40	41.25	31.75	83.25	20.5519	9.46999	43.6324	34.2963	25.9679	63.2629	middle
297	506	mmu-miR-467c-5p	TAAGTGCGTGCATGTATATGTG	22	chr2	+	10473931	10474027	cctttgtgcaTAAGTGCGTGCATGTATATGTGtgtatattttatgcATATACATACACACACCTATacacacatgcacacagacatgcgagaatggc	1	mmu-mir-467c,	mmu-mir-467c	cctttgtgcaTAAGTGCGTGCATGTATATGTGtgtatattttatgcATATACATACACACACCTATACacacatgcacacagacatgcgagaatggc	mmu-miR-467c-5p	TAAGTGCGTGCATGTATATGTG	5'	Yes	gp1a	((((..(((((..(((((((..(((((((((((((((...............)))))))))..))))))..)))))))......)))))..)).)).	96	40.2	-29.3	84	60	94	126	83.4	104	153.454	58.2769	102.536	104.759	68.2116	79.0311	middle
297	507	mmu-miR-467c-3p_R-2	ATATACATACACACACCTAT	20	chr2	+	10473931	10474027	cctttgtgcaTAAGTGCGTGCATGTATATGTGtgtatattttatgcATATACATACACACACCTATacacacatgcacacagacatgcgagaatggc	1	mmu-mir-467c,	mmu-mir-467c	cctttgtgcaTAAGTGCGTGCATGTATATGTGtgtatattttatgcATATACATACACACACCTATACacacatgcacacagacatgcgagaatggc	mmu-miR-467c-3p	ATATACATACACACACCTATAC	3'	Diff	gp1a	((((..(((((..(((((((..(((((((((((((((...............)))))))))..))))))..)))))))......)))))..)).)).	96	40.2	-29.3	0	3	0	0	0	0	0	2.91384	0	0	0	0	low
298	508	mmu-miR-467b-5p_L-1R+1	TAAGTGCCTGCATGTATATGC	21	chr2	+	10476346	10476418	ctgtgtgcgTAAGTGCCTGCATGTATATGCgtgtatattttatgcATATACATACACACACCTACACacacat	1	mmu-mir-467a-1,	mmu-mir-467a-1	ctgtgtgcGTAAGTGCCTGCATGTATATGcgtgtatattttatgcATATACATACACACACCTACACacacat	mmu-miR-467b-5p	GTAAGTGCCTGCATGTATATG	5'	Diff	gp1a	.((((((.(((.(((..((.(((((((((((((.......))))))))))))).))..))).))).)))))).	71	39.7	-32.2	24	33	28.25	35.75	43.15	29.75	43.844	32.0523	30.8154	29.7234	35.2918	22.6074	middle
298	509	mmu-miR-467d-3p	ATATACATACACACACCTACAC	22	chr2	+	10476346	10476418	ctgtgtgcgTAAGTGCCTGCATGTATATGCgtgtatattttatgcATATACATACACACACCTACACacacat	1	mmu-mir-467a-1,	mmu-mir-467a-1	ctgtgtgcGTAAGTGCCTGCATGTATATGcgtgtatattttatgcATATACATACACACACCTACACacacat	mmu-miR-467d-3p	ATATACATACACACACCTACAC	3'	Yes	gp1a	.((((((.(((.(((..((.(((((((((((((.......))))))))))))).))..))).))).)))))).	71	39.7	-32.2	11.25	9.75	40	41.25	31.75	83.25	20.5519	9.46999	43.6324	34.2963	25.9679	63.2629	middle
299	510	mmu-miR-467e-5p	ATAAGTGTGAGCATGTATATGT	22	chr2	+	10505721	10505807	gcctgtgtgcATAAGTGTGAGCATGTATATGTgtgtatattttatgcATATACATACACACACCTATatacacatgcacacagacat	1	mmu-mir-467e,	mmu-mir-467e	gcctgtgtgcATAAGTGTGAGCATGTATATGTgtgtatattttatgcATATACATACACACACCTATATacacatgcacacagacat	mmu-miR-467e-5p	ATAAGTGTGAGCATGTATATGT	5'	Yes	gp1a	..((((((((((..(((((...(((((((((..((.......))..)))))))))...)))))..........))))))))))....	81	36.8	-32.4	45	57	83	123	77	83	82.2075	55.363	90.5372	102.265	62.9772	63.0729	middle
299	511	mmu-miR-467e-3p_R-2	ATATACATACACACACCTAT	20	chr2	+	10505721	10505807	gcctgtgtgcATAAGTGTGAGCATGTATATGTgtgtatattttatgcATATACATACACACACCTATatacacatgcacacagacat	1	mmu-mir-467e,	mmu-mir-467e	gcctgtgtgcATAAGTGTGAGCATGTATATGTgtgtatattttatgcATATACATACACACACCTATATacacatgcacacagacat	mmu-miR-467e-3p	ATATACATACACACACCTATAT	3'	Diff	gp1a	..((((((((((..(((((...(((((((((..((.......))..)))))))))...)))))..........))))))))))....	81	36.8	-32.4	0	3	0	0	0	0	0	2.91384	0	0	0	0	low
300	512	mmu-miR-467b-5p_L-1R+1	TAAGTGCCTGCATGTATATGC	21	chr2	+	10483678	10483760	tgtgcccgtgtgcgTAAGTGCCTGCATGTATATGCgtgtatattttatgcATATACATACACACACCTACACacacatgcaca	3	mmu-mir-467a-10,mmu-mir-467a-6,mmu-mir-467a-3,	mmu-mir-467a-10	tgtgcccgtgtgcGTAAGTGCCTGCATGTATATGcgtgtatattttatgcATATACATACACACACCTACACacacatgcaca	mmu-miR-467b-5p	GTAAGTGCCTGCATGTATATG	5'	Diff	gp1a	.((((..(((((.(((.(((..((.(((((((((((((.......))))))))))))).))..))).))).)))))..)))).	81	43.4	-37.5	24	33	28.25	35.75	43.15	29.75	43.844	32.0523	30.8154	29.7234	35.2918	22.6074	middle
300	513	mmu-miR-467d-3p	ATATACATACACACACCTACAC	22	chr2	+	10483678	10483760	tgtgcccgtgtgcgTAAGTGCCTGCATGTATATGCgtgtatattttatgcATATACATACACACACCTACACacacatgcaca	3	mmu-mir-467a-10,mmu-mir-467a-6,mmu-mir-467a-3,	mmu-mir-467a-10	tgtgcccgtgtgcGTAAGTGCCTGCATGTATATGcgtgtatattttatgcATATACATACACACACCTACACacacatgcaca	mmu-miR-467d-3p	ATATACATACACACACCTACAC	3'	Yes	gp1a	.((((..(((((.(((.(((..((.(((((((((((((.......))))))))))))).))..))).))).)))))..)))).	81	43.4	-37.5	11.25	9.75	40	41.25	31.75	83.25	20.5519	9.46999	43.6324	34.2963	25.9679	63.2629	middle
301	514	mmu-miR-467b-5p_L-1R+1	TAAGTGCCTGCATGTATATGC	21	chr2	+	10478798	10478880	tgtgcctgtgtgcgTAAGTGCCTGCATGTATATGCgtgtatattttatgcATATACATACACACACCTACACacacatgcaca	6	mmu-mir-467a-4,mmu-mir-467a-5,mmu-mir-467a-2,mmu-mir-467a-8,mmu-mir-467a-9,mmu-mir-467a-7,	mmu-mir-467a-4	tgtgcctgtgtgcGTAAGTGCCTGCATGTATATGcgtgtatattttatgcATATACATACACACACCTACACacacatgcaca	mmu-miR-467b-5p	GTAAGTGCCTGCATGTATATG	5'	Diff	gp1a	.((((.((((((.(((.(((..((.(((((((((((((.......))))))))))))).))..))).))).)))))).)))).	81	42.2	-40.2	24	33	28.25	35.75	43.15	29.75	43.844	32.0523	30.8154	29.7234	35.2918	22.6074	middle
301	515	mmu-miR-467d-3p	ATATACATACACACACCTACAC	22	chr2	+	10478798	10478880	tgtgcctgtgtgcgTAAGTGCCTGCATGTATATGCgtgtatattttatgcATATACATACACACACCTACACacacatgcaca	6	mmu-mir-467a-4,mmu-mir-467a-5,mmu-mir-467a-2,mmu-mir-467a-8,mmu-mir-467a-9,mmu-mir-467a-7,	mmu-mir-467a-4	tgtgcctgtgtgcGTAAGTGCCTGCATGTATATGcgtgtatattttatgcATATACATACACACACCTACACacacatgcaca	mmu-miR-467d-3p	ATATACATACACACACCTACAC	3'	Yes	gp1a	.((((.((((((.(((.(((..((.(((((((((((((.......))))))))))))).))..))).))).)))))).)))).	81	42.2	-40.2	11.25	9.75	40	41.25	31.75	83.25	20.5519	9.46999	43.6324	34.2963	25.9679	63.2629	middle
302	516	mmu-miR-468-3p	TATGACTGATGTGCGTGTGTCTG	23	chr6	-	81896599	81896676	ataagaaacttggcgtgtcgtgactgatgtactgataagaaactcagtgtgaTATGACTGATGTGCGTGTGTCTGtct	1	mmu-mir-468,	mmu-mir-468	ataagaaacttggcgtgtcgtGACTGATGTACTGATAAGAAACTCAGTgtgaTATGACTGATGTGCGTGTGTCTGtct	mmu-miR-468-3p	TATGACTGATGTGCGTGTGTCTG	3'	Yes	gp1a	...(((.((...(((..(((.........((((((........)))))).........)))..)))..)).)))....	71	42.3	-14.7	11	24	17	19	16	11	20.0952	23.3107	18.5438	15.7971	13.0862	8.35906	middle
303	517	mmu-miR-470-5p	TTCTTGGACTGGCACTGGTGAGT	23	chrX	-	66813951	66814025	cagtgctcTTCTTGGACTGGCACTGGTGAGTtaaactaaatacaaccagtacctttctgagaagagtaaagctca	1	mmu-mir-470,	mmu-mir-470	cagtgctcTTCTTGGACTGGCACTGGTGAGTtaaactaaatacAACCAGTACCTTTCTGAGAAGAgtaaagctca	mmu-miR-470-5p	TTCTTGGACTGGCACTGGTGAGT	5'	Yes	gp1a	...(((((((((..((..((.((((((..(((......)))...)))))).))..))..))))))))).......	65	42.7	-29.7	7	7	11	12	8	10	12.7878	6.79897	11.9989	9.97709	6.54308	7.59914	middle
304	518	mmu-miR-471-5p	TACGTAGTATAGTGCTTTTCAC	22	chrX	-	66792588	66792665	agcagtgcttTACGTAGTATAGTGCTTTTCACattaaacaaaaagtgaaaggtgccatactatgtataggaaggctta	2	mmu-mir-471,rno-mir-471,	mmu-mir-471	gtgcttTACGTAGTATAGTGCTTTTCACattaaacaaaaagTGAAAGGTGCCATACTATGTATagga	mmu-miR-471-5p	TACGTAGTATAGTGCTTTTCAC	5'	Yes	gp1a	(((....((.((((((((((.(..((((((((.((......)).))))))))..).)))))))))).))....)))..	76	35.9	-28.7	14	17	12	15	12	11	25.5757	16.5118	13.0897	12.4714	9.81463	8.35906	middle
305	519	mmu-miR-483-5p	AAGACGGGAGAAGAGAAGGGAG	22	chr7	-	142654924	142654996	gagggggAAGACGGGAGAAGAGAAGGGAGtggtttttgggtgcctCACTCCTCCCCTCCCGTCTTGTtctctc	3	mmu-mir-483,rno-mir-483,cpo-mir-483,	mmu-mir-483	gagggggAAGACGGGAGAAGAGAAGGGAGtggtttttgggtgccTCACTCCTCCCCTCCCGTCTTgttctctc	mmu-miR-483-5p	AAGACGGGAGAAGAGAAGGGAG	5'	Yes	gp1a	(((((..((((((((((..((....((((((((........)))..)))))))..))))))))))...)))))	73	58.9	-31.2	8	23	19	0	7	12	14.6147	22.3395	20.7254	0	5.7252	9.11897	middle
305	520	mmu-miR-483-3p_L-1R+2	CACTCCTCCCCTCCCGTCTTGT	22	chr7	-	142654924	142654996	gagggggAAGACGGGAGAAGAGAAGGGAGtggtttttgggtgcctCACTCCTCCCCTCCCGTCTTGTtctctc	3	mmu-mir-483,rno-mir-483,cpo-mir-483,	mmu-mir-483	gagggggAAGACGGGAGAAGAGAAGGGAGtggtttttgggtgccTCACTCCTCCCCTCCCGTCTTgttctctc	mmu-miR-483-3p	TCACTCCTCCCCTCCCGTCTT	3'	Diff	gp1a	(((((..((((((((((..((....((((((((........)))..)))))))..))))))))))...)))))	73	58.9	-31.2	0	18	12	0	7	23	0	17.4831	13.0897	0	5.7252	17.478	middle
306	521	mmu-miR-484	TCAGGCTCAGTCCCCTCCCGAT	22	chr16	+	14159597	14159692	gggggggcggggcctcgcggccctgcagcctcgTCAGGCTCAGTCCCCTCCCGATaaacctcaaaatagggtcttacctagggggctggcggcgta	2	mmu-mir-484,rno-mir-484,	mmu-mir-484	ctcgTCAGGCTCAGTCCCCTCCCGATaaacctcaaaatagggtcttacctagggggctggcggcgta	mmu-miR-484	TCAGGCTCAGTCCCCTCCCGAT	5'	Yes	gp1a	((((..((((((((....))))))))..)))).....((.(((((((((.........(((......))).........)))))))))))......	53	67.7	-46.7	14283	20807	29500	45213	32908	32513	26092.6	20209.4	32178.9	37591.2	26915	24707.1	high
307	522	mmu-miR-485-5p_R+1	AGAGGCTGGCCGTGATGAATTCG	23	chr12	+	109734891	109734994	tcatgtgtgatacttggagAGAGGCTGGCCGTGATGAATTCGattcatctaaacgaGTCATACACGGCTCTCCTCTCTtctagtgtcaaactctgcctcagagg	16	mmu-mir-485,rno-mir-485,hsa-mir-485,ppy-mir-485,mml-mir-485,bta-mir-485,eca-mir-485,ptr-mir-485,cja-mir-485,cfa-mir-485,pal-mir-485,dno-mir-485,ppa-mir-485,efu-mir-485,ggo-mir-485,ocu-mir-485,	mmu-mir-485	acttggagAGAGGCTGGCCGTGATGAATTCgattcatctaaacgAGTCATACACGGCTCTCCTCTCttctagt	mmu-miR-485-5p	AGAGGCTGGCCGTGATGAATTC	5'	Diff	gp1a	.......(((((((.(((((((((..(((((((((((.((((...........)))))))).)))))))..))))))))).)))))))..(((((...))))).	81	48.1	-47.8	335	1444	1109	1309	1343	1994	611.989	1402.53	1209.71	1088.33	1098.42	1515.27	middle
307	523	mmu-miR-485-3p_L-1R+1	GTCATACACGGCTCTCCTCTCT	22	chr12	+	109734891	109734994	tcatgtgtgatacttggagAGAGGCTGGCCGTGATGAATTCGattcatctaaacgaGTCATACACGGCTCTCCTCTCTtctagtgtcaaactctgcctcagagg	16	mmu-mir-485,rno-mir-485,hsa-mir-485,ppy-mir-485,mml-mir-485,bta-mir-485,eca-mir-485,ptr-mir-485,cja-mir-485,cfa-mir-485,pal-mir-485,dno-mir-485,ppa-mir-485,efu-mir-485,ggo-mir-485,ocu-mir-485,	mmu-mir-485	acttggagAGAGGCTGGCCGTGATGAATTCgattcatctaaacgAGTCATACACGGCTCTCCTCTCttctagt	mmu-miR-485-3p	AGTCATACACGGCTCTCCTCTC	3'	Diff	gp1a	.......(((((((.(((((((((..(((((((((((.((((...........)))))))).)))))))..))))))))).)))))))..(((((...))))).	81	48.1	-47.8	494	1564	1399	1532	2431	3018	902.455	1519.08	1526.04	1273.74	1988.28	2293.42	middle
308	524	mmu-miR-486b-5p	TCCTGTACTGAGCTGCCCCGAG	22	chr8	+	23142555	23142682	cagccagctctgatctcgccctccctgaggggTCCTGTACTGAGCTGCCCCGAGgtccttcactgtgctcagctCGGGGCAGCTCAGTACAGGATGcgtcagggtgggagacaacggggaacaagcca	10	mmu-mir-486a,cgr-mir-486,hsa-mir-486-1,ppy-mir-486,eca-mir-486,ptr-mir-486,pal-mir-486a-1,tch-mir-486,ppa-mir-486-1,sbo-mir-486a,	mmu-mir-486a	cagccagctctgatctcgccctccctgaggggTCCTGTACTGAGCTGCCCCGAGgtccttcactgtgctcagctCGGGGCAGCTCAGTACAGGATgcgtcagggtgggagacaacggggaacaagcca	mmu-miR-486b-5p	TCCTGTACTGAGCTGCCCCGAG	5'	Yes	gp1a	..((...(((((...((.(((.((((((...(((((((((((((((((((((((........(((....))))))))))))))))))))))))))...)))))).))).))...))))).....))..	124	63.3	-74.7	223.5	622.5	722.5	569	466	477	408.297	604.622	788.11	473.08	381.135	362.479	middle
308	525	mmu-miR-486a-3p_R+1	CGGGGCAGCTCAGTACAGGATG	22	chr8	+	23142555	23142682	cagccagctctgatctcgccctccctgaggggTCCTGTACTGAGCTGCCCCGAGgtccttcactgtgctcagctCGGGGCAGCTCAGTACAGGATGcgtcagggtgggagacaacggggaacaagcca	10	mmu-mir-486a,cgr-mir-486,hsa-mir-486-1,ppy-mir-486,eca-mir-486,ptr-mir-486,pal-mir-486a-1,tch-mir-486,ppa-mir-486-1,sbo-mir-486a,	mmu-mir-486a	cagccagctctgatctcgccctccctgaggggTCCTGTACTGAGCTGCCCCGAGgtccttcactgtgctcagctCGGGGCAGCTCAGTACAGGATgcgtcagggtgggagacaacggggaacaagcca	mmu-miR-486a-3p	CGGGGCAGCTCAGTACAGGAT	3'	Diff	gp1a	..((...(((((...((.(((.((((((...(((((((((((((((((((((((........(((....))))))))))))))))))))))))))...)))))).))).))...))))).....))..	124	63.3	-74.7	0	4	7	5	7.5	3.5	0	3.88512	7.63567	4.15712	6.13414	2.6597	low
309	526	mmu-miR-486b-5p	TCCTGTACTGAGCTGCCCCGAG	22	chr8	-	23142573	23142662	cccaccctgacgcaTCCTGTACTGAGCTGCCCCGAGctgagcacagtgaaggacctCGGGGCAGCTCAGTACAGGACCcctcagggaggg	9	mmu-mir-486b,rno-mir-486,hsa-mir-486-2,ppa-mir-486-2,sbo-mir-486b,mml-mir-486,cfa-mir-486,efu-mir-486,pal-mir-486a-2,	mmu-mir-486b	cccaccctgacgcaTCCTGTACTGAGCTGCCCCGAGctgagcacagtgaaggacctCGGGGCAGCTCAGTACAGGAcccctcagggaggg	mmu-miR-486b-5p	TCCTGTACTGAGCTGCCCCGAG	5'	Yes	gp1a	(((.((((((....((((((((((((((((((((((((..((...))..))...))))))))))))))))))))))....)))))).)))	90	65.6	-62.8	223.5	622.5	722.5	569	466	477	408.297	604.622	788.11	473.08	381.135	362.479	middle
309	527	mmu-miR-486b-3p_R+2	CGGGGCAGCTCAGTACAGGATG	22	chr8	-	23142573	23142662	cccaccctgacgcaTCCTGTACTGAGCTGCCCCGAGctgagcacagtgaaggacctCGGGGCAGCTCAGTACAGGACCcctcagggaggg	9	mmu-mir-486b,rno-mir-486,hsa-mir-486-2,ppa-mir-486-2,sbo-mir-486b,mml-mir-486,cfa-mir-486,efu-mir-486,pal-mir-486a-2,	mmu-mir-486b	cccaccctgacgcaTCCTGTACTGAGCTGCCCCGAGctgagcacagtgaaggacctCGGGGCAGCTCAGTACAGGAcccctcagggaggg	mmu-miR-486b-3p	CGGGGCAGCTCAGTACAGGA	3'	Diff	gp1a	(((.((((((....((((((((((((((((((((((((..((...))..))...))))))))))))))))))))))....)))))).)))	90	65.6	-62.8	0	4	7	5	7.5	3.5	0	3.88512	7.63567	4.15712	6.13414	2.6597	low
310	528	mmu-miR-487b-3p	AATCGTACAGGGTCATCCACTT	22	chr12	+	109727330	109727425	ctttggtacttggagagtggttatccctgtcctcttcgcttcactcatgccgAATCGTACAGGGTCATCCACTTtttcagtatcaagtgcgcagac	10	mmu-mir-487b,rno-mir-487b,hsa-mir-487b,ppy-mir-487b,bta-mir-487b,eca-mir-487b,ptr-mir-487b,mml-mir-487b,ssc-mir-487b,oar-mir-487b,	mmu-mir-487b	tggtacttggagagTGGTTATCCCTGTCCTCTTCGcttcactcatgccgAATCGTACAGGGTCATCCACTTtttcagtatca	mmu-miR-487b-3p	AATCGTACAGGGTCATCCACTT	3'	Yes	gp1a	.(((((((((..((((((((....((((((....(((((.........).))))....))))))....))))))))..))))))))).........	86	49	-33.6	60	169	69	124	224	187	109.61	164.147	75.2659	103.097	183.206	142.104	middle
311	529	mmu-miR-488-5p_1ss11AG	CCCAGATAATGGCACTCTCAA	21	chr1	+	158505625	158505740	ttcgggtgagagtgagaatcctctctCCCAGATAATAGCACTCTCAAacaagtttccatgttgtTTGAAAGGCTGTTTCTTGGTCAgaagactctcaatttcttctggaagactca	4	mmu-mir-488,rno-mir-488,bta-mir-488,ggo-mir-488,	mmu-mir-488	ttcgggtgagagtgagaatcctctctCCCAGATAATAGCACTCTCAAacaagtttccatgttgtTTGAAAGGCTGTTTCTTGGTCagaagactctcaatttcttctgga	mmu-miR-488-5p	CCCAGATAATAGCACTCTCAA	5'	Diff	gp1a	(((((..((((.(((((.((.(((..((.(((.((((((.((.((((((((.........)))))))).))))))))))).))..))).)).))))).))))..))))).......	109	42.2	-38.9	28	27	29	26	26	19	51.1513	26.2246	31.6335	21.617	21.265	14.4384	middle
311	530	mmu-miR-488-3p_R+1	TTGAAAGGCTGTTTCTTGGTCT	22	chr1	+	158505625	158505740	ttcgggtgagagtgagaatcctctctCCCAGATAATAGCACTCTCAAacaagtttccatgttgtTTGAAAGGCTGTTTCTTGGTCAgaagactctcaatttcttctggaagactca	4	mmu-mir-488,rno-mir-488,bta-mir-488,ggo-mir-488,	mmu-mir-488	ttcgggtgagagtgagaatcctctctCCCAGATAATAGCACTCTCAAacaagtttccatgttgtTTGAAAGGCTGTTTCTTGGTCagaagactctcaatttcttctgga	mmu-miR-488-3p	TTGAAAGGCTGTTTCTTGGTC	3'	Diff	gp1a	(((((..((((.(((((.((.(((..((.(((.((((((.((.((((((((.........)))))))).))))))))))).))..))).)).))))).))))..))))).......	109	42.2	-38.9	8	7	12	7	7	0	14.6147	6.79897	13.0897	5.81997	5.7252	0	middle
312	531	mmu-miR-490-3p	CAACCTGGAGGACTCCATGCTG	22	chr6	+	36421725	36421851	tggaagcctggctgatttggaaagttcattgttcgacaccatggatctccaggtgggtcacgtttagatatacacCAACCTGGAGGACTCCATGCTGttgagctgttcacaagcagcggaacttcta	22	mmu-mir-490,rno-mir-490,cpo-mir-490,hsa-mir-490,mml-mir-490,bta-mir-490,eca-mir-490,ptr-mir-490,ppy-mir-490,cfa-mir-490,efu-mir-490,ssc-mir-490-2,ssc-mir-490-1,ggo-mir-490,pal-mir-490,dno-mir-490,ocu-mir-490,chi-mir-490,gga-mir-490,cli-mir-490,tgu-mir-490-1,tgu-mir-490-2,	mmu-mir-490	tggaaagttcattgttcgacaCCATGGATCTCCAGGTGGGTcacgtttagatatacacCAACCTGGAGGACTCCATGCTGttga	mmu-miR-490-3p	CAACCTGGAGGACTCCATGCTG	3'	Yes	gp1a	((((((((..((((.(((((((........((((((((.(((((((((((((((.(((...((........))))).)))))))))..)))))).))))))))..))).))))))))))..))))))	127	48.8	-49.7	30	14	21	22	23	13	54.805	13.5979	22.907	18.2913	18.8114	9.87888	middle
313	532	mmu-miR-491-5p	AGTGGGGAACCCTTCCATGAGG	22	chr4	+	88122037	88122138	gggaattgacttagctgggaAGTGGGGAACCCTTCCATGAGGagtagaacactccttatgcaagattcccttctacctgactgagttgaagtcatatcctgc	15	mmu-mir-491,cpo-mir-491,hsa-mir-491,ppy-mir-491,mml-mir-491,bta-mir-491,eca-mir-491,ptr-mir-491,cja-mir-491,ssc-mir-491,ggo-mir-491,dno-mir-491,tch-mir-491,ocu-mir-491,chi-mir-491,	mmu-mir-491	aattgacttagctgggaAGTGGGGAACCCTTCCATGAGGagtagaacactcCTTATGCAAGATTCCCTTCTACctgactgagttga	mmu-miR-491-5p	AGTGGGGAACCCTTCCATGAGG	5'	Yes	gp1a	.((..(..((((((..(((.((..(((((..(((.((((((((((.....)))))))))).))).)))))..)).)))..))))))..)..)).........	92	48	-42	10	27	53	32	75	76	18.2683	26.2246	57.8129	26.6056	61.3414	57.7535	middle
314	533	mmu-miR-493-5p_R+3	TTGTACATGGTAGGCTTTCATT	22	chr12	+	109580219	109580332	gggctcactctggccgccagggccTTGTACATGGTAGGCTTTCATTcattttttgcacattcggTGAAGGTCCTACTGTGTGCCAGGccctgtgccaggcatcgtgtagatgga	15	mmu-mir-493,rno-mir-493,hsa-mir-493,ppy-mir-493,mml-mir-493,bta-mir-493,eca-mir-493b,cja-mir-493,efu-mir-493,ssc-mir-493,ggo-mir-493,pal-mir-493,chi-mir-493,oar-mir-493,ppa-mir-493,	mmu-mir-493	cgccagggccTTGTACATGGTAGGCTTTCattcattttttgcacattcggTGAAGGTCCTACTGTGTGCCAGGccctgtgcca	mmu-miR-493-5p	TTGTACATGGTAGGCTTTC	5'	Diff	gp1a	.........(((((...((((((((.(((((..((((((((((((..................))))))).)))))..))))).)))))))).))))).((((.....))))..	89	55.3	-53.9	67	177	114	282	454	275	122.398	171.917	124.352	234.462	371.32	208.976	middle
314	534	mmu-miR-493-3p	TGAAGGTCCTACTGTGTGCCAGG	23	chr12	+	109580219	109580332	gggctcactctggccgccagggccTTGTACATGGTAGGCTTTCATTcattttttgcacattcggTGAAGGTCCTACTGTGTGCCAGGccctgtgccaggcatcgtgtagatgga	15	mmu-mir-493,rno-mir-493,hsa-mir-493,ppy-mir-493,mml-mir-493,bta-mir-493,eca-mir-493b,cja-mir-493,efu-mir-493,ssc-mir-493,ggo-mir-493,pal-mir-493,chi-mir-493,oar-mir-493,ppa-mir-493,	mmu-mir-493	cgccagggccTTGTACATGGTAGGCTTTCattcattttttgcacattcggTGAAGGTCCTACTGTGTGCCAGGccctgtgcca	mmu-miR-493-3p	TGAAGGTCCTACTGTGTGCCAGG	3'	Yes	gp1a	.........(((((...((((((((.(((((..((((((((((((..................))))))).)))))..))))).)))))))).))))).((((.....))))..	89	55.3	-53.9	54	71	48	124	142	153	98.649	68.961	52.3589	103.097	116.14	116.267	middle
315	535	mmu-miR-494-5p	AGGTTGTCCGTGTTGTCTTCTC	22	chr12	+	109715309	109715410	cagtgctaattgatacttgaaggagAGGTTGTCCGTGTTGTCTTCTCtttatttatgaTGAAACATACACGGGAAACCTCTtttttagtatcaaatcccacc	17	mmu-mir-494,rno-mir-494,cpo-mir-494,dno-mir-494,ppa-mir-494,hsa-mir-494,eca-mir-494,ppy-mir-494,cfa-mir-494,bta-mir-494,ptr-mir-494,mml-mir-494,cja-mir-494,efu-mir-494,ssc-mir-494,ggo-mir-494,oar-mir-494,	mmu-mir-494	ttgatacttgaaggagAGGTTGTCCGTGTTGTCTTCTCtttatttatgaTGAAACATACACGGGAAACCTCttttttagtatcaa	mmu-miR-494-5p	AGGTTGTCCGTGTTGTCTTCTC	5'	Yes	gp1a	..(((....((((((((.(((..(((((((..(((((((((.(((((.........)).)))))).))))))..)))))))..)))))))))))....))).	99	38.2	-38.5	5	0	6	5	15	5	9.13416	0	6.54486	4.15712	12.2683	3.79957	middle
315	536	mmu-miR-494-3p_R+1	TGAAACATACACGGGAAACCTCT	23	chr12	+	109715309	109715410	cagtgctaattgatacttgaaggagAGGTTGTCCGTGTTGTCTTCTCtttatttatgaTGAAACATACACGGGAAACCTCTtttttagtatcaaatcccacc	17	mmu-mir-494,rno-mir-494,cpo-mir-494,dno-mir-494,ppa-mir-494,hsa-mir-494,eca-mir-494,ppy-mir-494,cfa-mir-494,bta-mir-494,ptr-mir-494,mml-mir-494,cja-mir-494,efu-mir-494,ssc-mir-494,ggo-mir-494,oar-mir-494,	mmu-mir-494	ttgatacttgaaggagAGGTTGTCCGTGTTGTCTTCTCtttatttatgaTGAAACATACACGGGAAACCTCttttttagtatcaa	mmu-miR-494-3p	TGAAACATACACGGGAAACCTC	3'	Diff	gp1a	..(((....((((((((.(((..(((((((..(((((((((.(((((.........)).)))))).))))))..)))))))..)))))))))))....))).	99	38.2	-38.5	764	1662	918	1807	2371	1925	1395.7	1614.27	1001.36	1502.38	1939.21	1462.83	middle
316	537	mmu-miR-495-5p	GAAGTTGCCCATGTTATTTTTCG	23	chr12	+	109718744	109718827	tggtacctgaaaaGAAGTTGCCCATGTTATTTTTCGcttttatttgtgacgAAACAAACATGGTGCACTTCTTtttcgatatca	13	mmu-mir-495,rno-mir-495,cpo-mir-495,hsa-mir-495,mml-mir-495,cja-mir-495,eca-mir-495,ptr-mir-495,ppy-mir-495,cfa-mir-495,pal-mir-495,dno-mir-495,ocu-mir-495,	mmu-mir-495	aaaGAAGTTGCCCATGTTATTTTTCGcttttatttgtgacgAAACAAACATGGTGCACTTCTT	mmu-miR-495-5p	GAAGTTGCCCATGTTATTTTTCG	5'	Yes	gp1a	.((((...((((((((((.(((((((((.((((((((........)))).))))..))))))).))))))))))))...)))).	82	35.7	-28.1	0	0	0	0	5	6	0	0	0	0	4.08943	4.55948	low
316	538	mmu-miR-495-3p	AAACAAACATGGTGCACTTCTT	22	chr12	+	109718744	109718827	tggtacctgaaaaGAAGTTGCCCATGTTATTTTTCGcttttatttgtgacgAAACAAACATGGTGCACTTCTTtttcgatatca	13	mmu-mir-495,rno-mir-495,cpo-mir-495,hsa-mir-495,mml-mir-495,cja-mir-495,eca-mir-495,ptr-mir-495,ppy-mir-495,cfa-mir-495,pal-mir-495,dno-mir-495,ocu-mir-495,	mmu-mir-495	aaaGAAGTTGCCCATGTTATTTTTCGcttttatttgtgacgAAACAAACATGGTGCACTTCTT	mmu-miR-495-3p	AAACAAACATGGTGCACTTCTT	3'	Yes	gp1a	.((((...((((((((((.(((((((((.((((((((........)))).))))..))))))).))))))))))))...)))).	82	35.7	-28.1	498	1454	588	706	1382	1728	909.763	1412.24	641.396	586.986	1130.32	1313.13	middle
317	539	mmu-miR-496a-5p	AGGTTGCCCATGGTGTGTTCA	21	chr12	+	109739111	109739211	cgaaatcaagtgttcgaatggAGGTTGCCCATGGTGTGTTCAttttatttatgatgAGTATTACATGGCCAATCTCCtttcggcactaaaatcttcctggg	13	mmu-mir-496a,rno-mir-496,cpo-mir-496,ocu-mir-496,cgr-mir-496,hsa-mir-496,bta-mir-496,eca-mir-496,ptr-mir-496,ppy-mir-496,mml-mir-496,cfa-mir-496,dno-mir-496,	mmu-mir-496a	agtgttcgaatggAGGTTGCCCATGGTGTGTTCAttttatttatgaTGAGTATTACATGGCCAATCTCctttcggcact	mmu-miR-496a-5p	AGGTTGCCCATGGTGTGTTCA	5'	Yes	gp1a	........((((.(((((.((((((((.(((((..((..(((((........)))))..))..))))).)))))))).)))))))))..............	79	41.6	-36.2	0	0	0	5	6	17	0	0	0	4.15712	4.90731	12.9185	middle
317	540	mmu-miR-496a-3p_L-2R+1	AGTATTACATGGCCAATCTCC	21	chr12	+	109739111	109739211	cgaaatcaagtgttcgaatggAGGTTGCCCATGGTGTGTTCAttttatttatgatgAGTATTACATGGCCAATCTCCtttcggcactaaaatcttcctggg	13	mmu-mir-496a,rno-mir-496,cpo-mir-496,ocu-mir-496,cgr-mir-496,hsa-mir-496,bta-mir-496,eca-mir-496,ptr-mir-496,ppy-mir-496,mml-mir-496,cfa-mir-496,dno-mir-496,	mmu-mir-496a	agtgttcgaatggAGGTTGCCCATGGTGTGTTCAttttatttatgaTGAGTATTACATGGCCAATCTCctttcggcact	mmu-miR-496a-3p	TGAGTATTACATGGCCAATCTC	3'	Diff	gp1a	........((((.(((((.((((((((.(((((..((..(((((........)))))..))..))))).)))))))).)))))))))..............	79	41.6	-36.2	83	234	124	202	475	322	151.627	227.28	135.26	167.948	388.496	244.692	middle
[truncated: 1,419 more rows]
