# Supplementary figures and images for: miR-344d-3p regulates osteogenic and adipogenic differentiation of mouse mandibular bone marrow mesenchymal stem cells
Source: PeerJ journal article supplement (doi:10.7717/peerj.14838), 2023-02-14

OhevsShe p<0.01

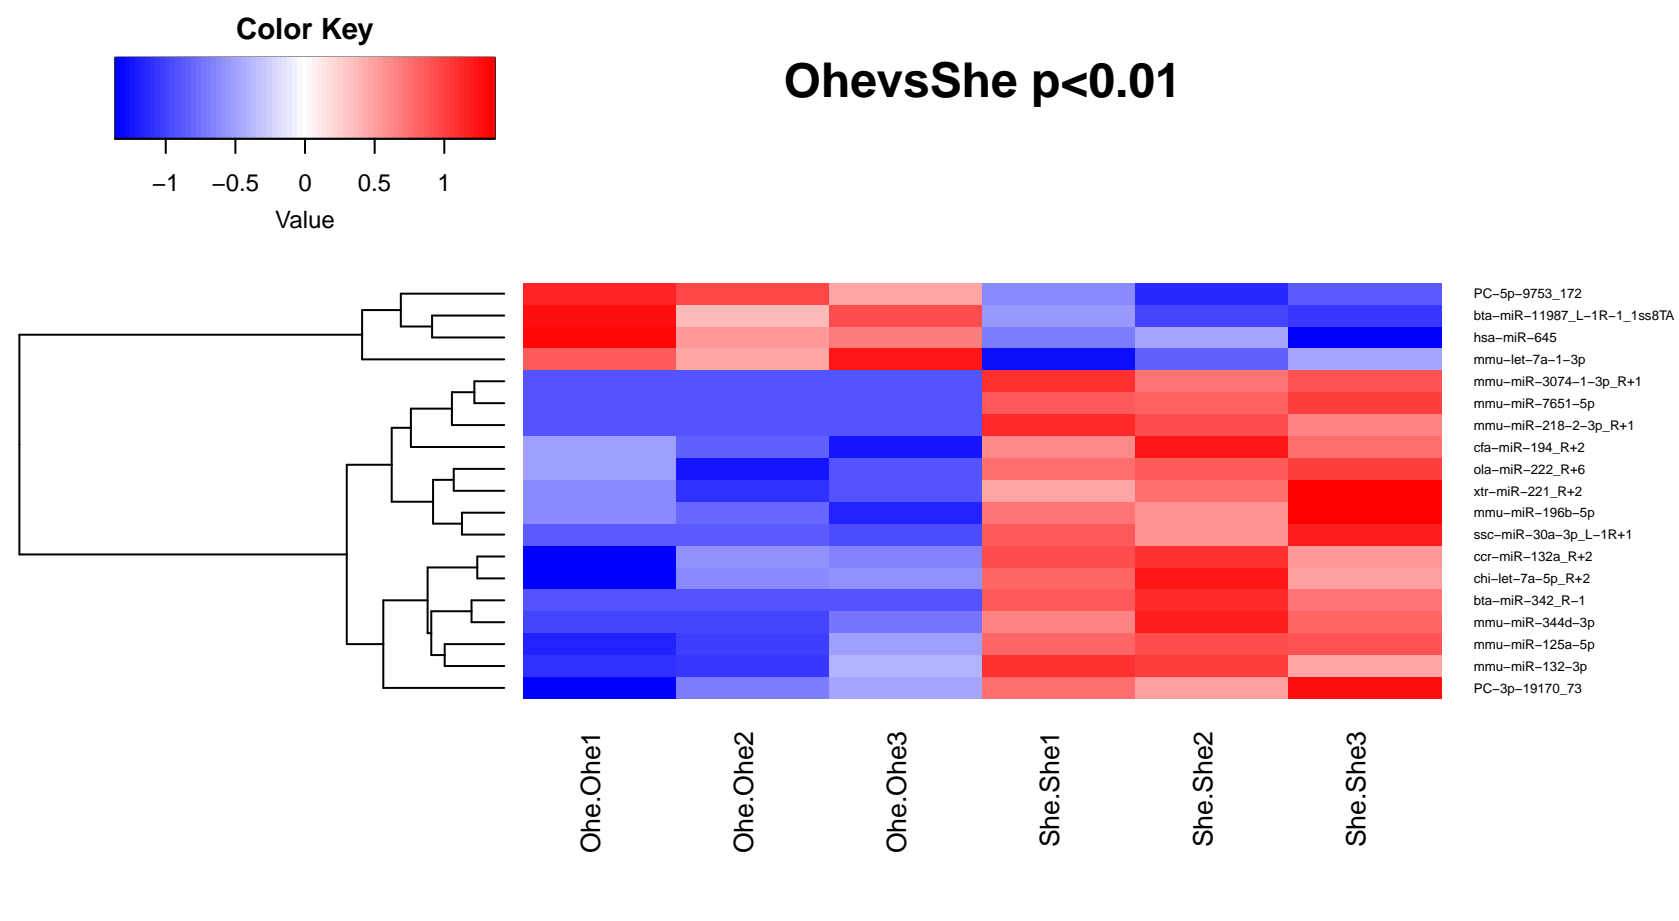

Color Key

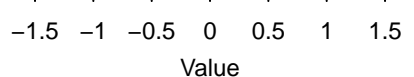

OhevsShe p<0.05

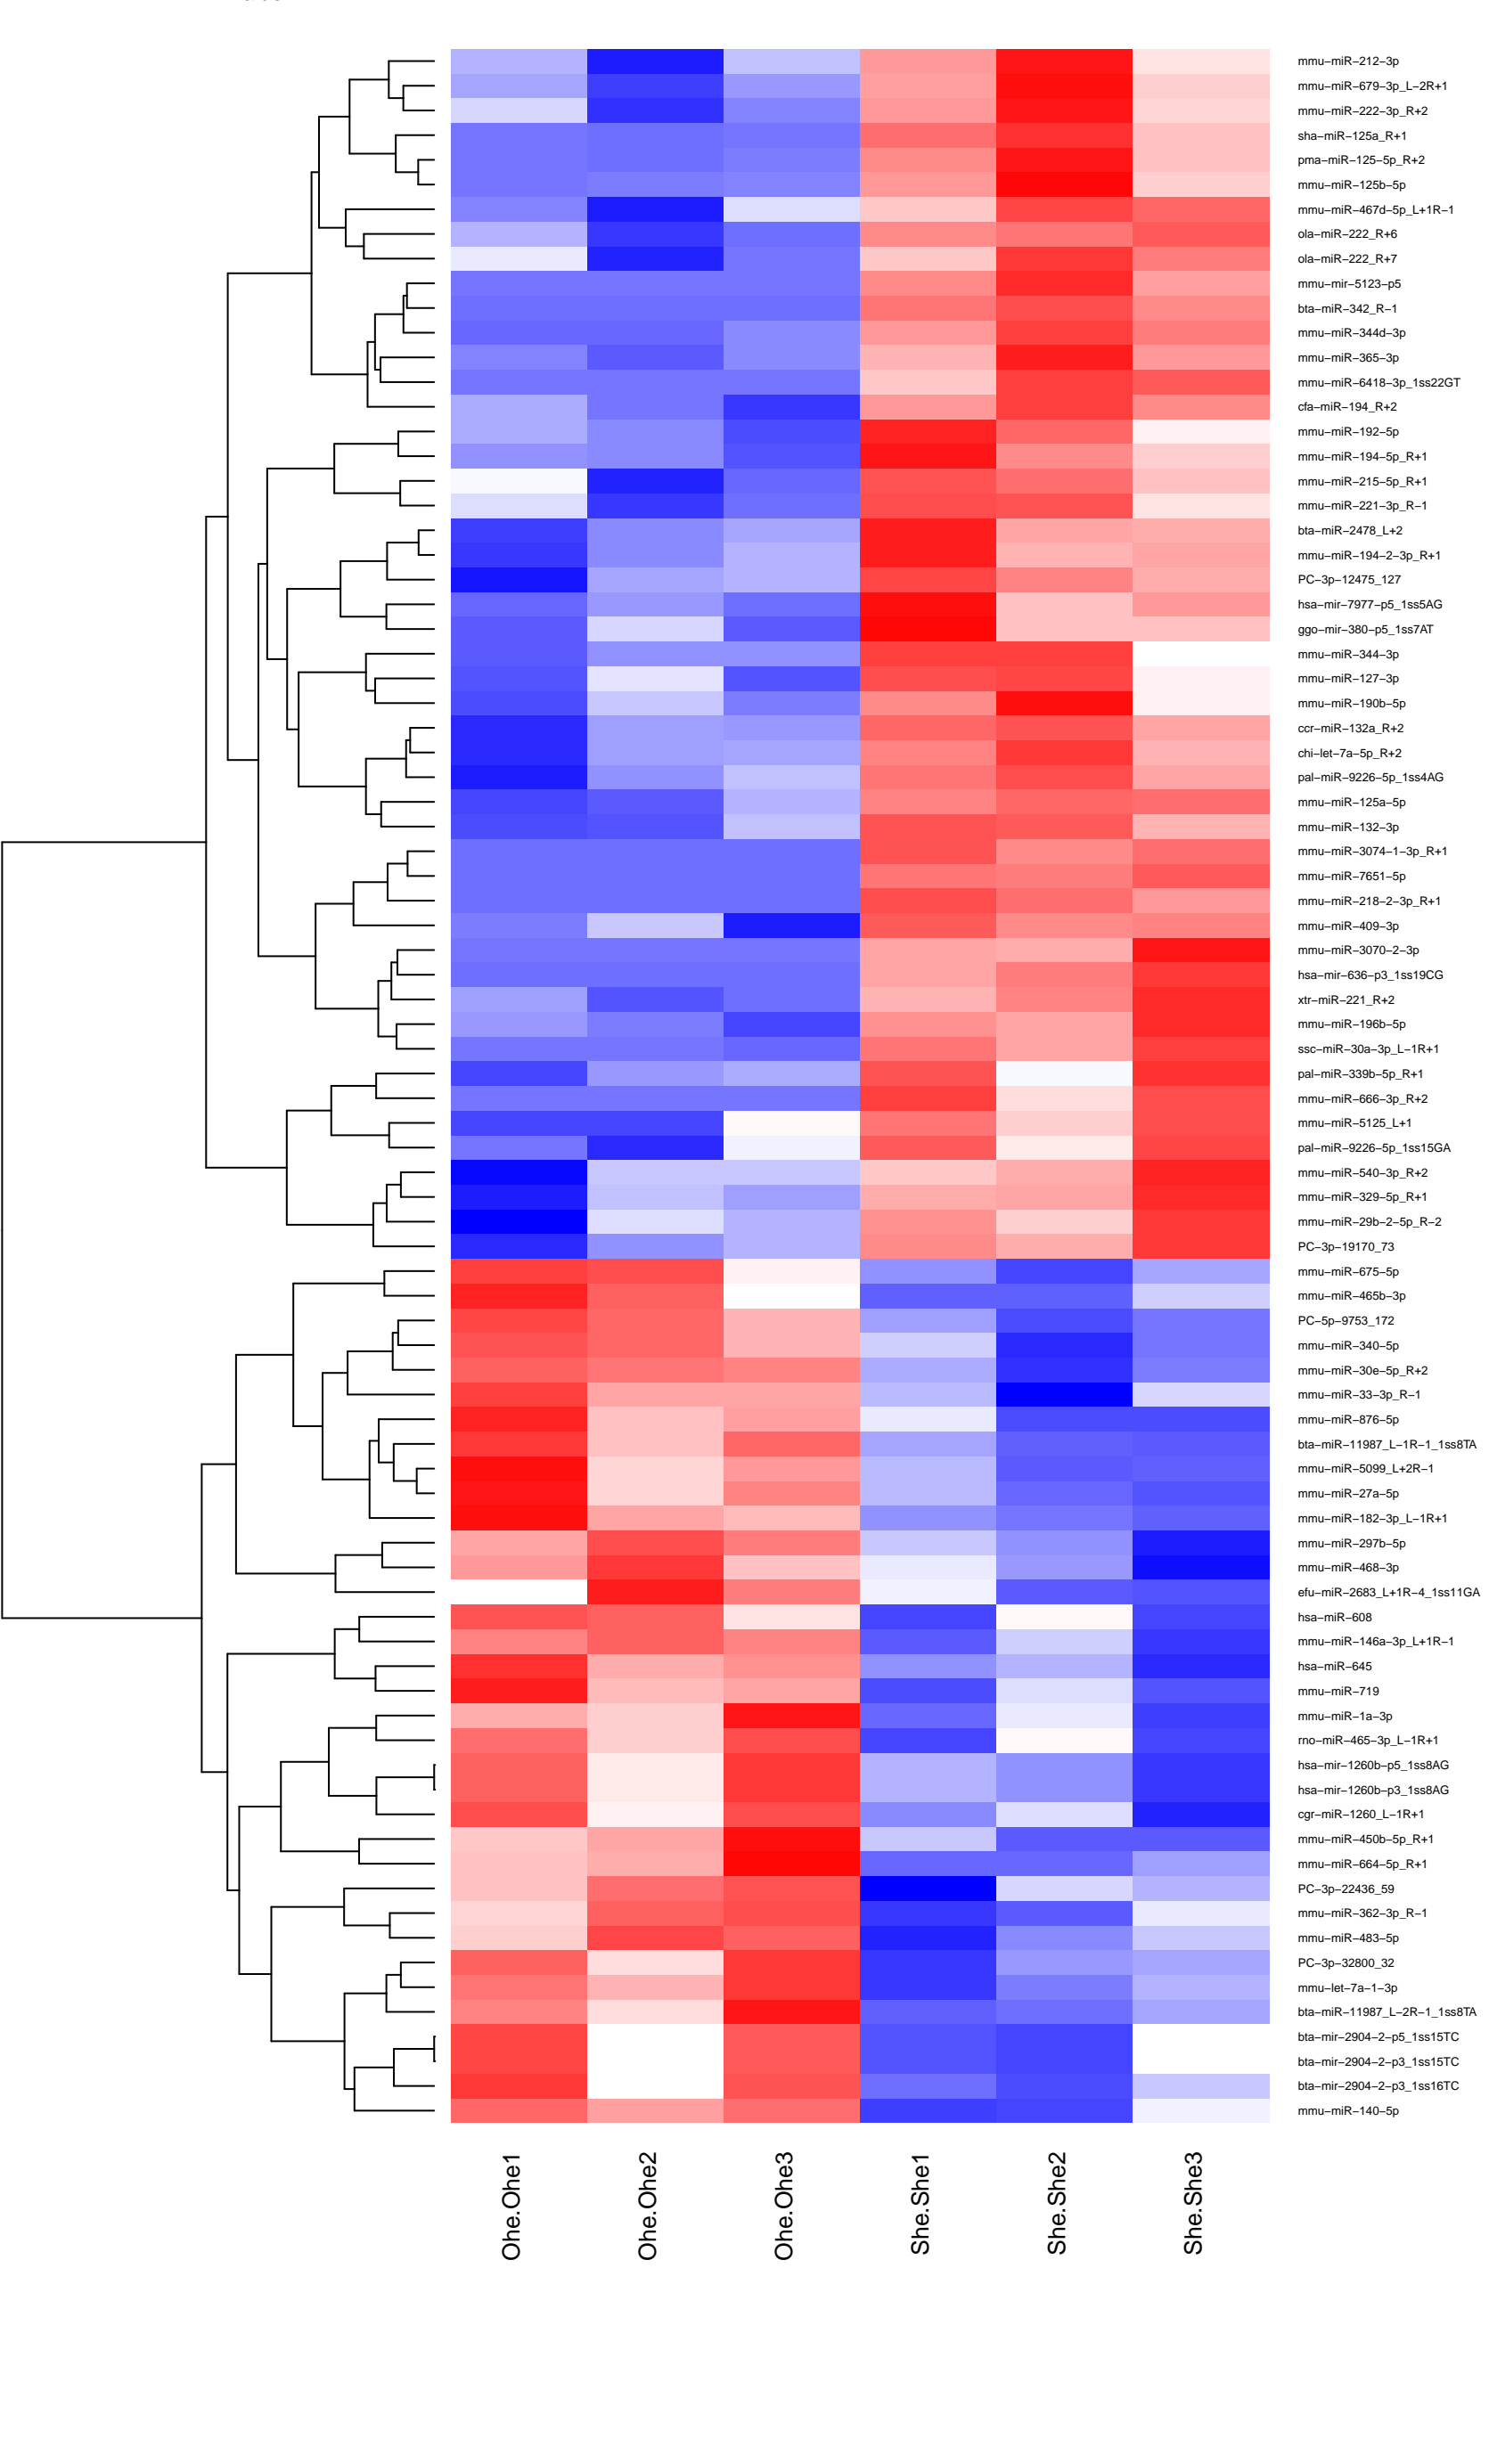

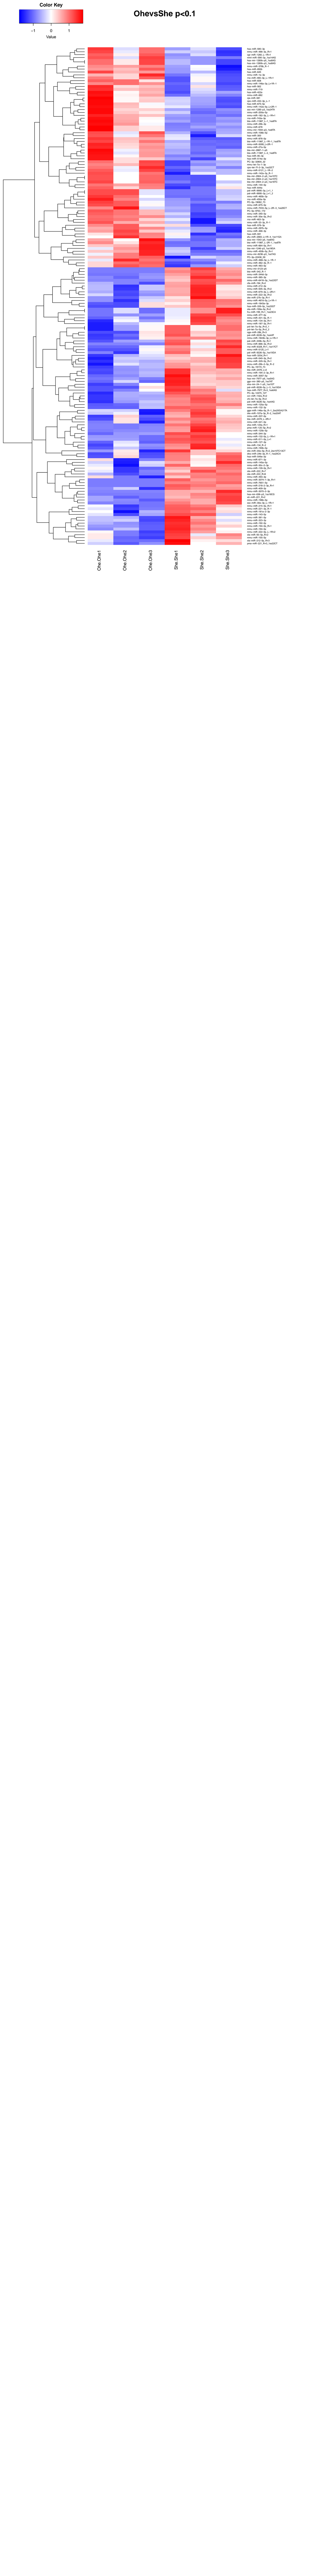

Supplement: Figure_2.zip [file Figure_2.zip]
